# Supplementary material for: Whole-Genome Resequencing of Seven Eggplant (Solanum melongena) and One Wild Relative (S. incanum) Accessions Provides New Insights and Breeding Tools for Eggplant Enhancement
Source: PubMed Central journal article supplement (PMC6791922; doi:10.3389/fpls.2019.01220), 2019-10-08

**Supplementary data S9.** Transposable elements organized by class identified in the seven *S. melongena* and one *S. incanum* (MM577) accessions.

Class//LTR/Copia

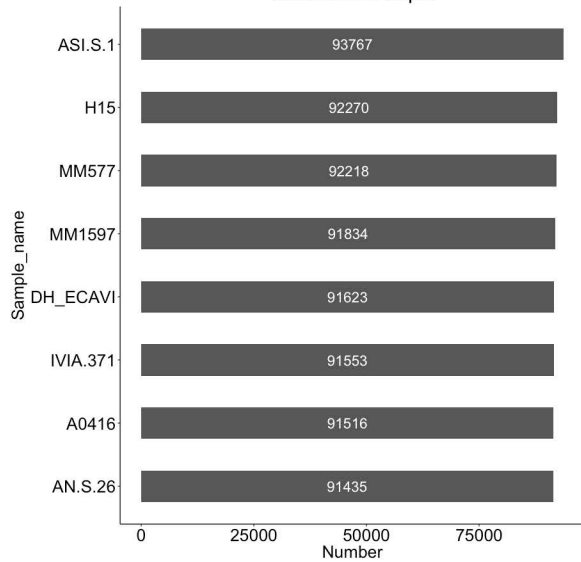

Class//LTR/ltr\_Others

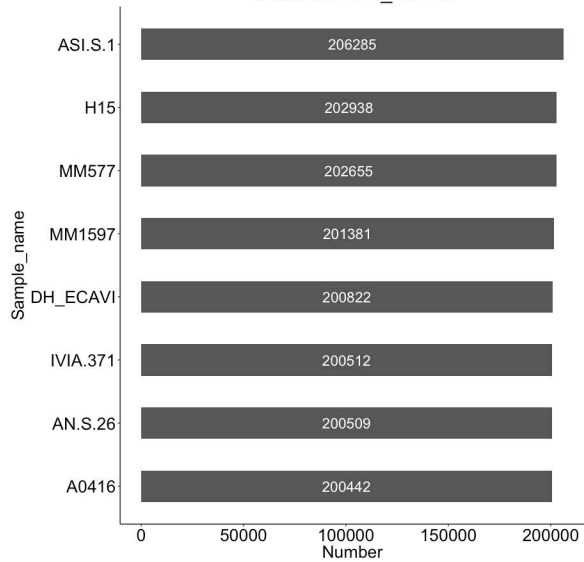

Class//LTR/Gypsy

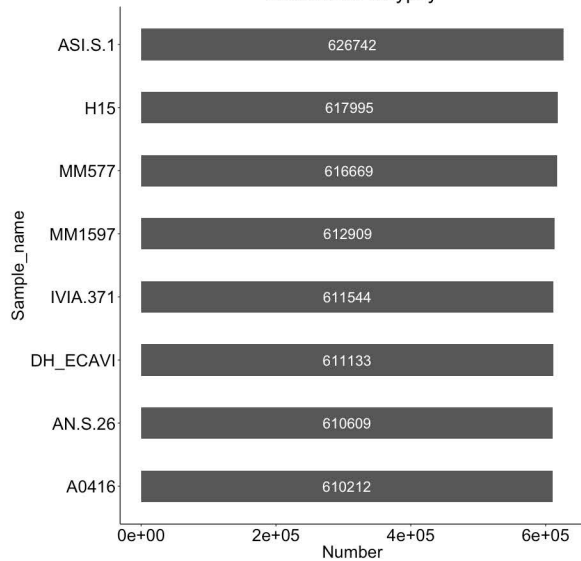

Class//LTR/Caulimovirus

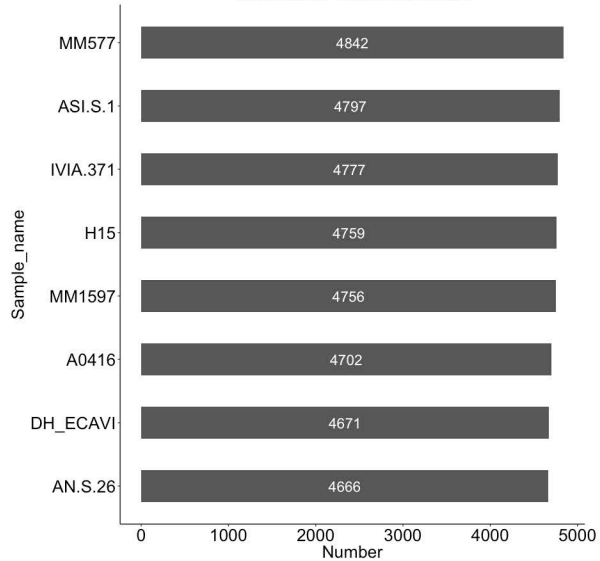

ClassII//DNA\_MITE/hAT

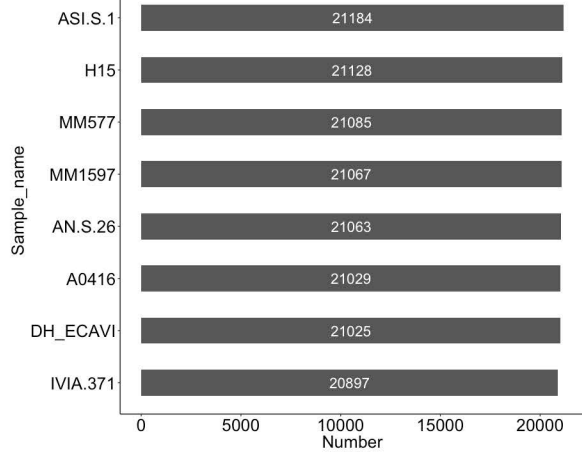

ClassII//DNA\_MITE/MuDR

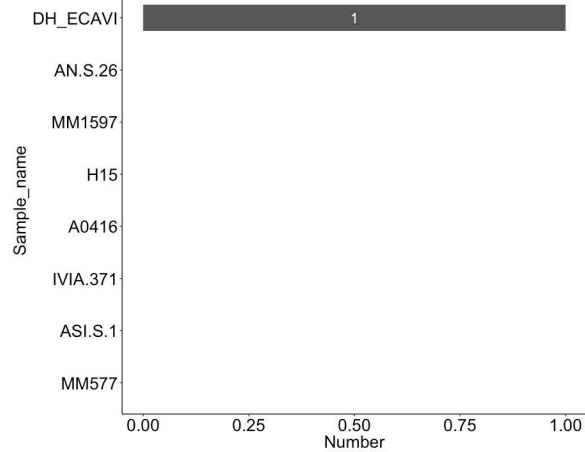

ClassII//DNA\_nMITE/Harbinger

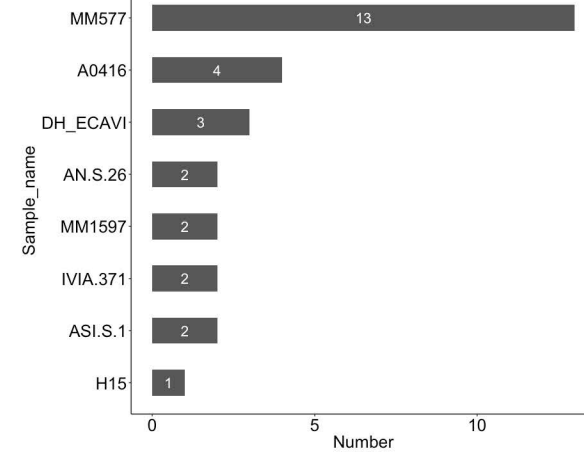

ClassII//DNA\_MITE/Tc

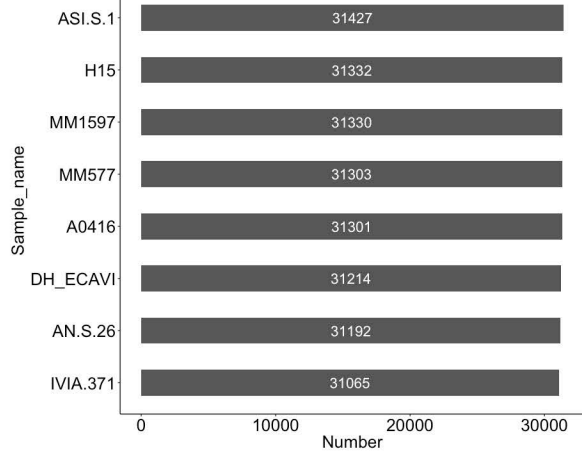

ClassII//DNA\_nMITE/MuDR

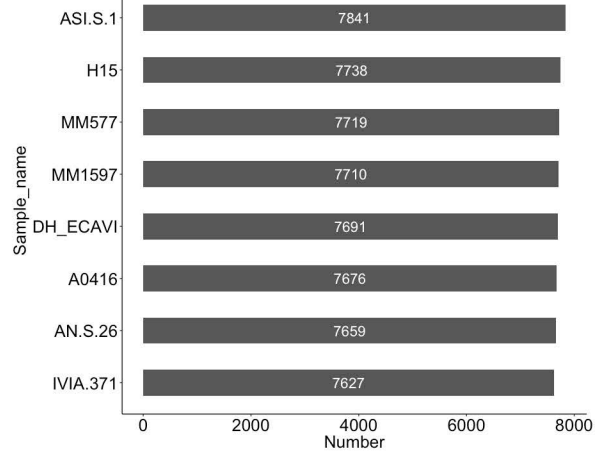

ClassII//DNA\_MITE/mites\_Others

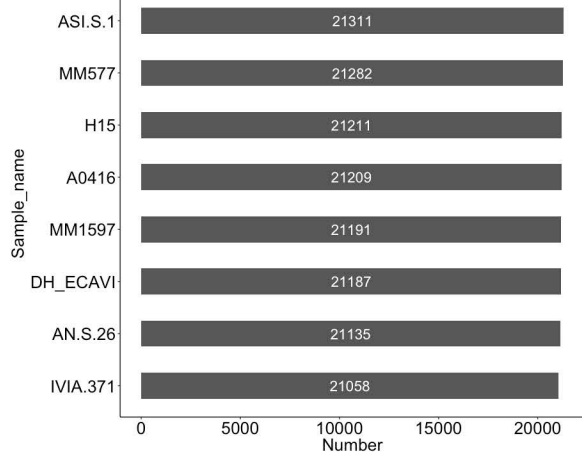

ClassII//DNA\_nMITE/EnSpm

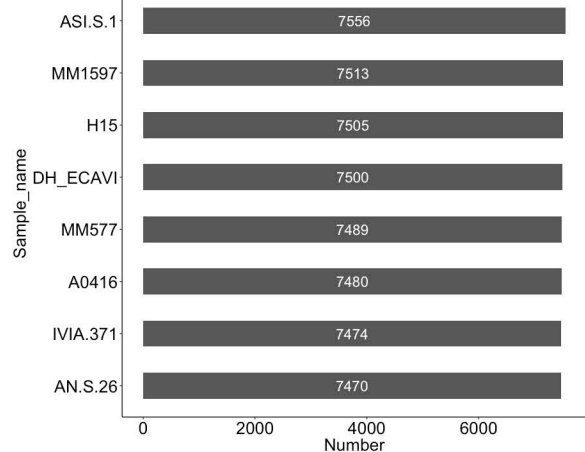

Class//nLTR/LINE

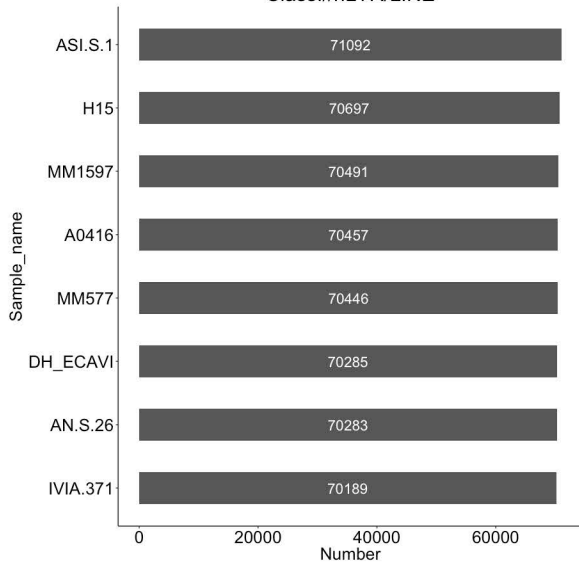

Class//nLTR/SINE

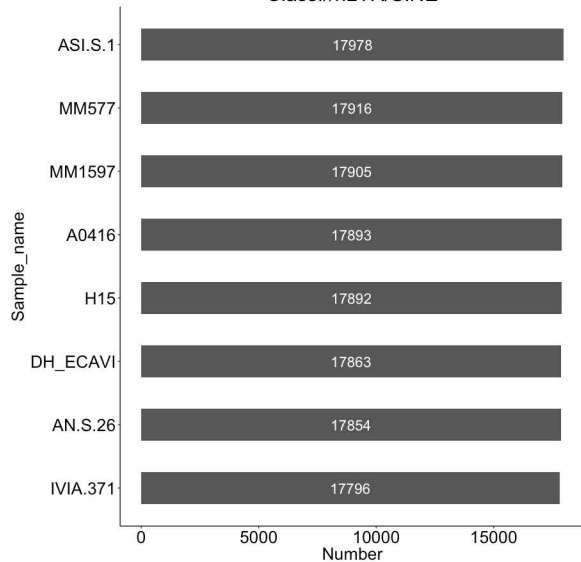

Supplement: DataSheet_9.pdf [file DataSheet_9.pdf]
