# Supplementary material for: Whole-Genome Resequencing of Seven Eggplant (Solanum melongena) and One Wild Relative (S. incanum) Accessions Provides New Insights and Breeding Tools for Eggplant Enhancement
Source: PubMed Central journal article supplement (PMC6791922; doi:10.3389/fpls.2019.01220), 2019-10-08
Supplement: DataSheet_3.pdf [file DataSheet_3.pdf]

**Supplementary data S3.** Distribution of homozygous (red) and heterozygous (blue) polymorphisms along all the chromosomes for the seven *S. melongena* and one *S. incanum* (MM577) accessions resequenced identified using the *S. melongena* accession "67/3" as a reference genome (Barchi et al., 2019a). The peaks represent high frequencies of polymorphisms in a window size of 10 Mbp. The dashed lines of the same colour indicate similar patterns of polymorphisms distribution.

# Chromosome 1 homozygous variants

MM577

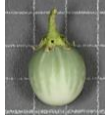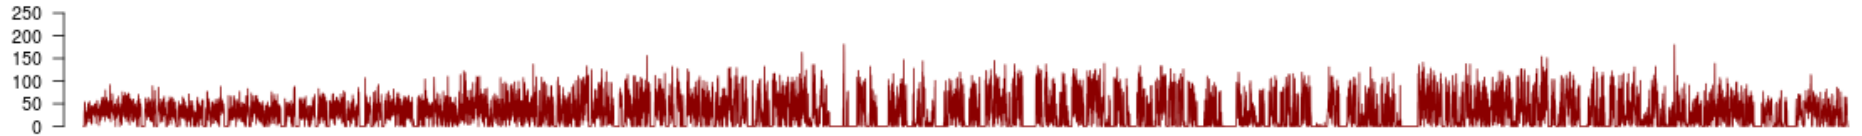

MM1597

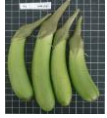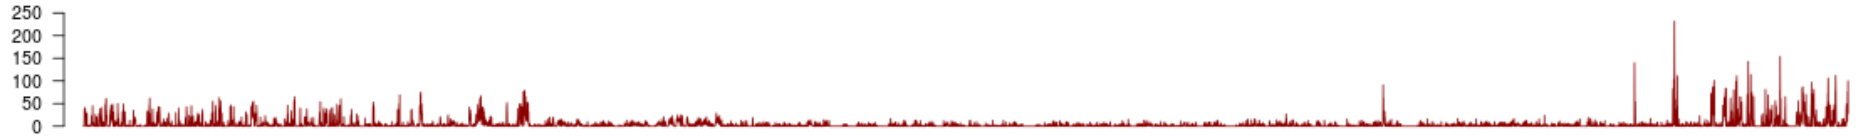

DH ECAVI

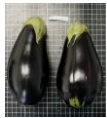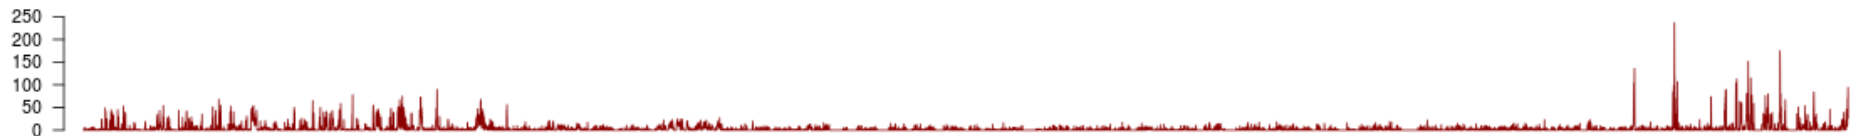

AN-S-26

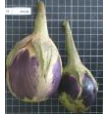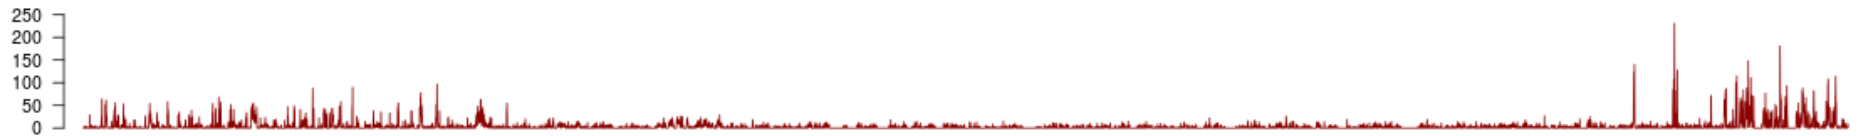

H15

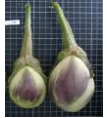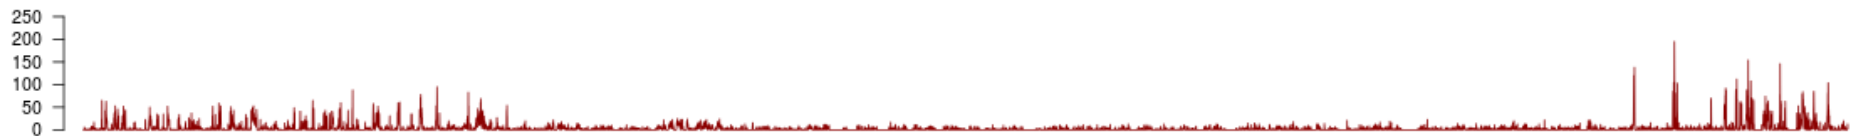

A0416

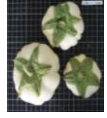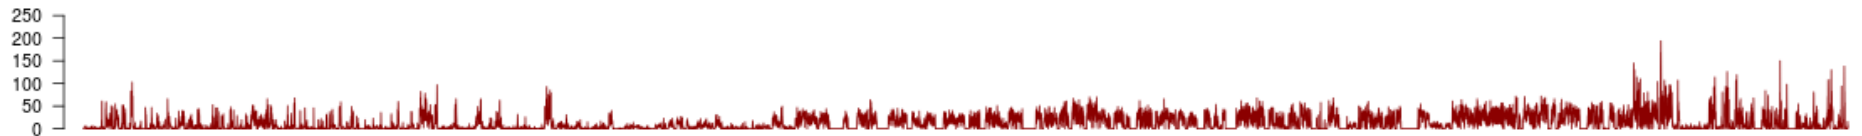

IVIA-371

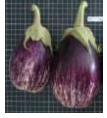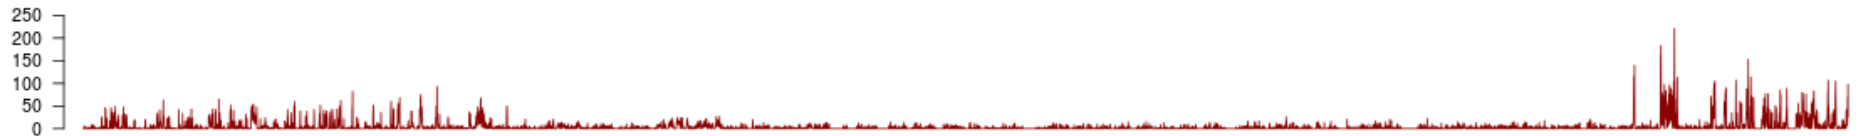

ASI-S-1

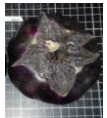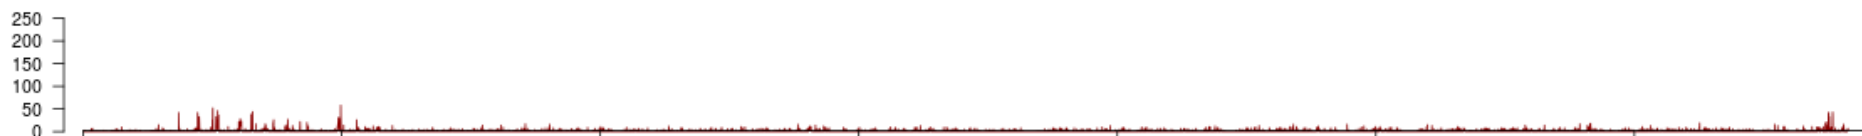

0 20 40 60 80 100 120 140

# Chromosome 2 homozygous variants

MM577

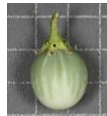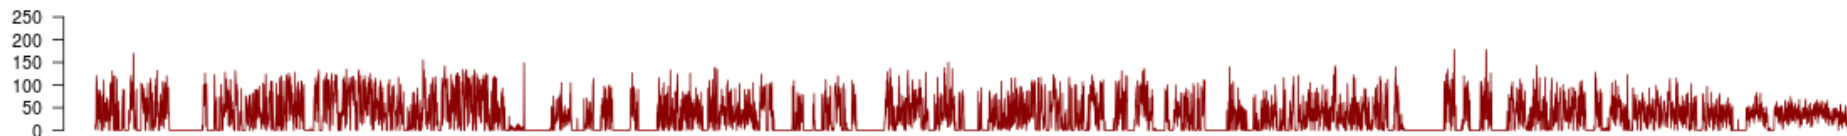

MM1597

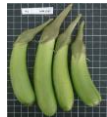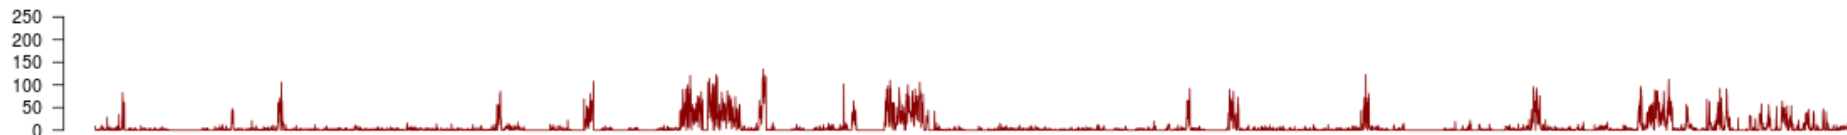

DH ECAVI

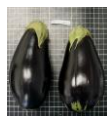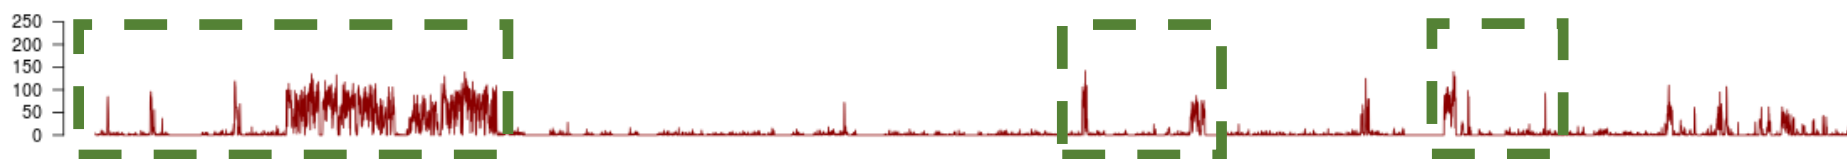

AN-S-26

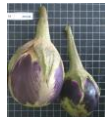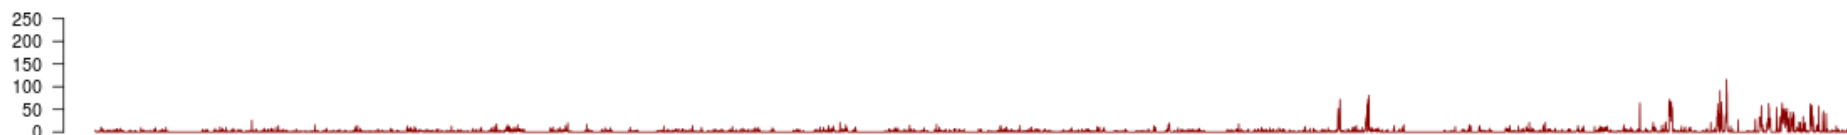

H15

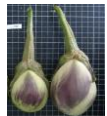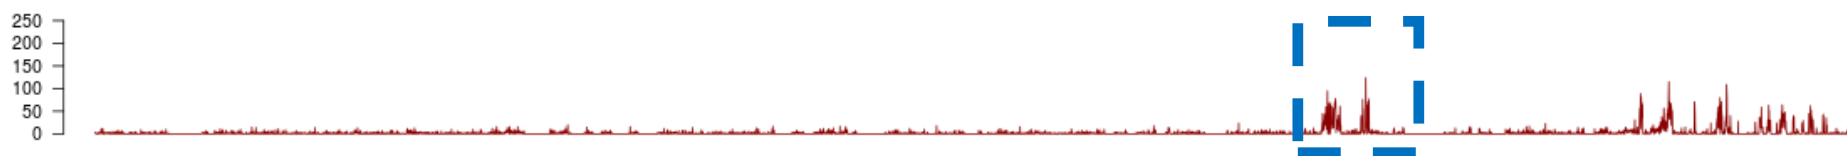

A0416

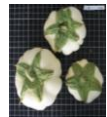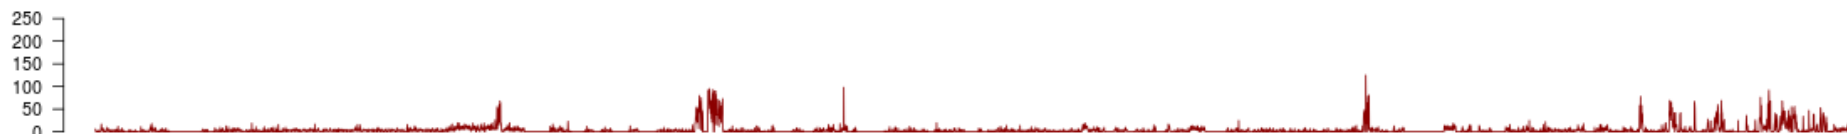

IVIA-371

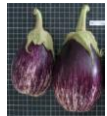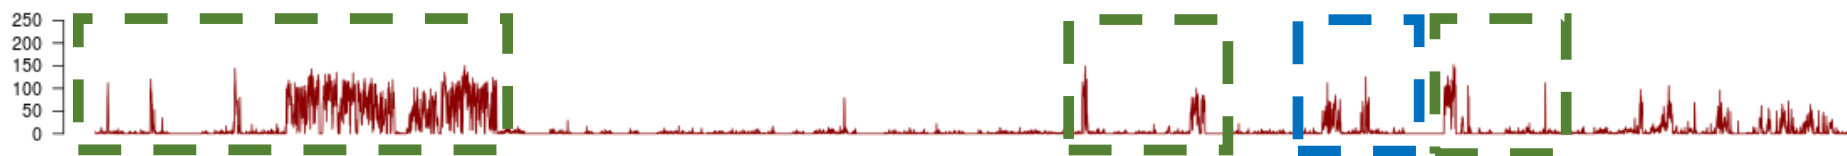

ASI-S-1

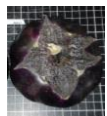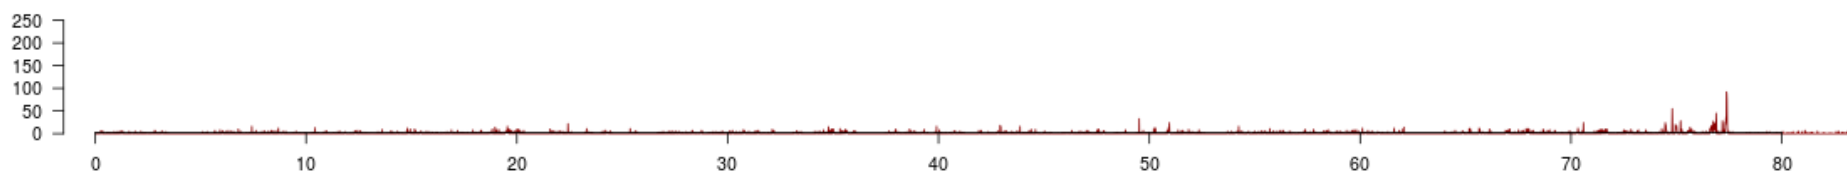

# Chromosome 3 homozygous variants

MM577

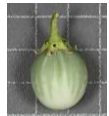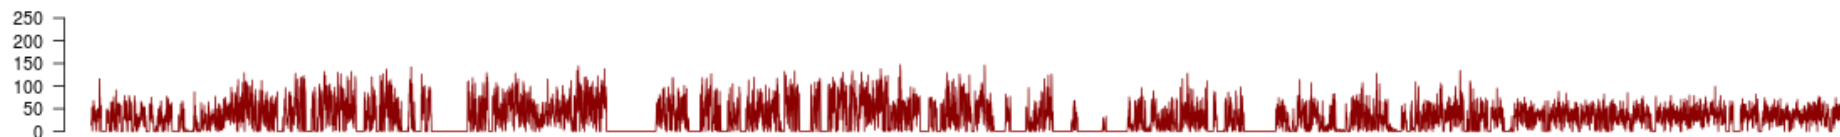

MM1597

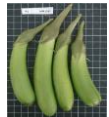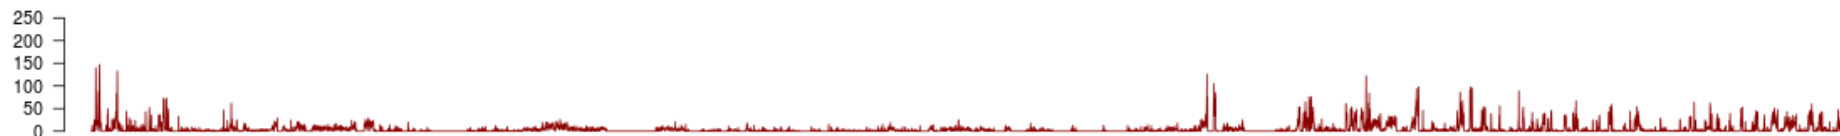

DH ECAVI

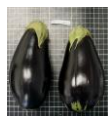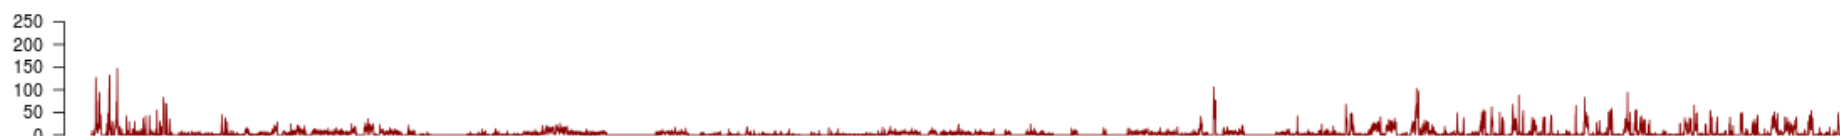

AN-S-26

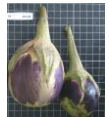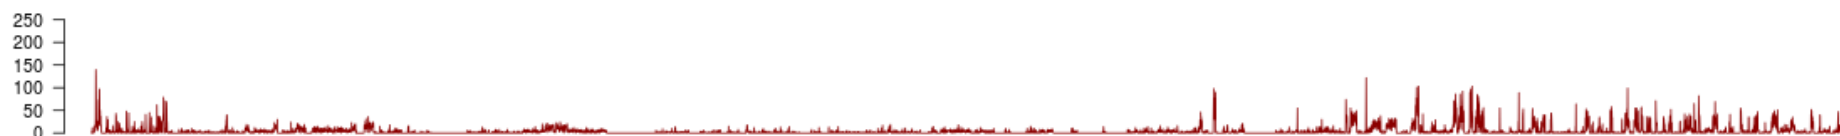

H15

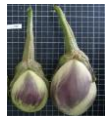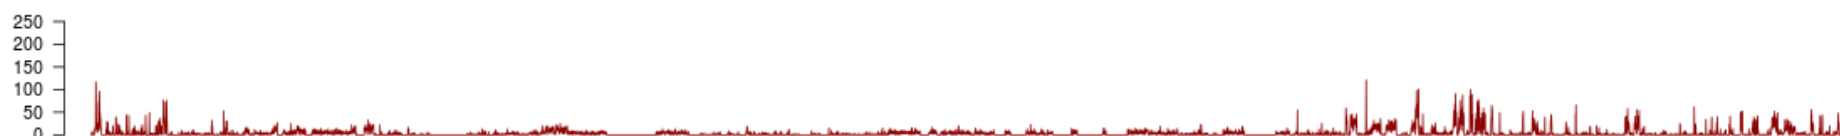

A0416

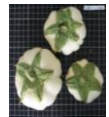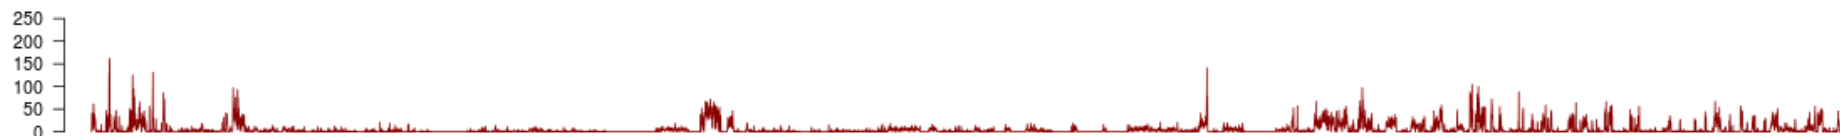

IVIA-371

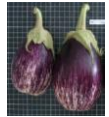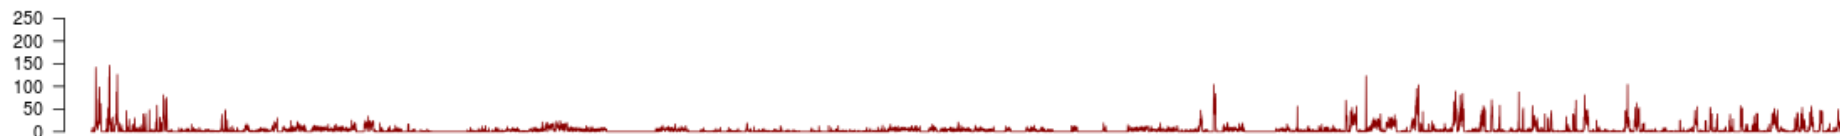

ASI-S-1

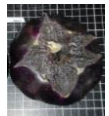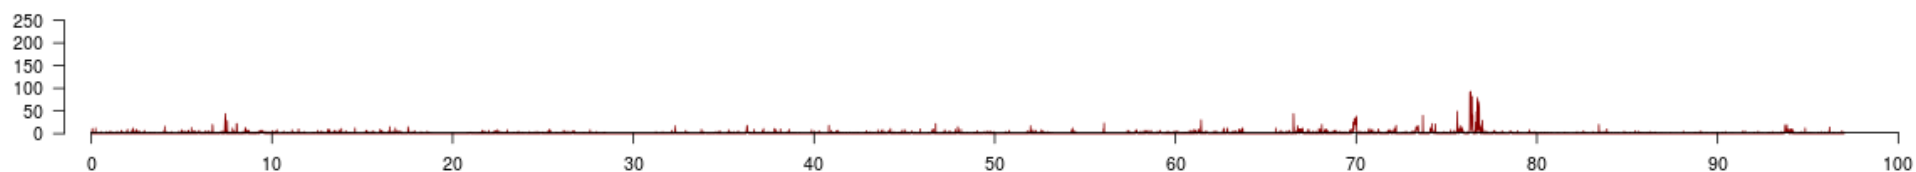

# Chromosome 4 homozygous variants

MM577

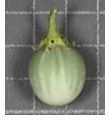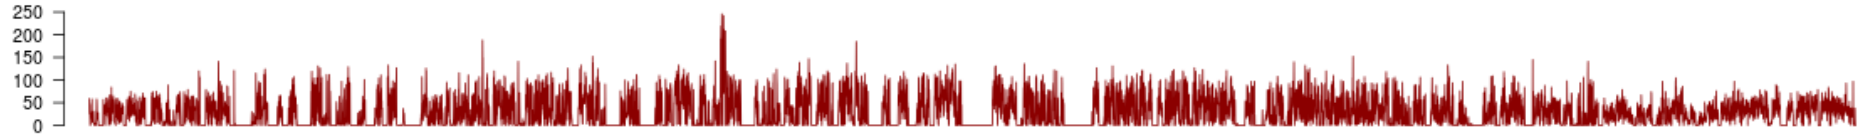

MM1597

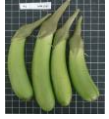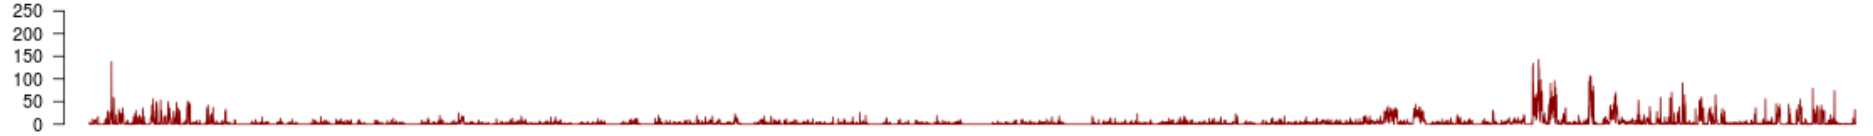

DH ECAVI

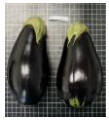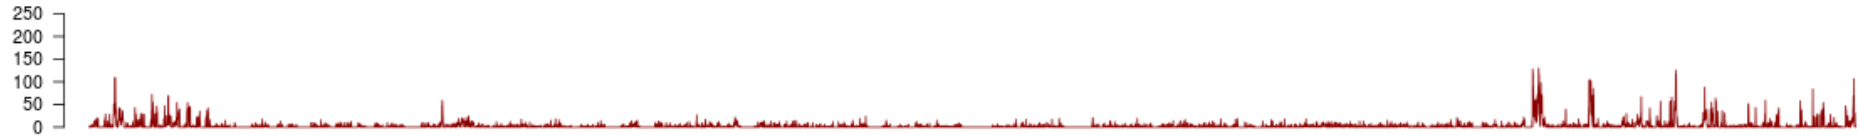

AN-S-26

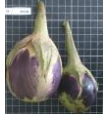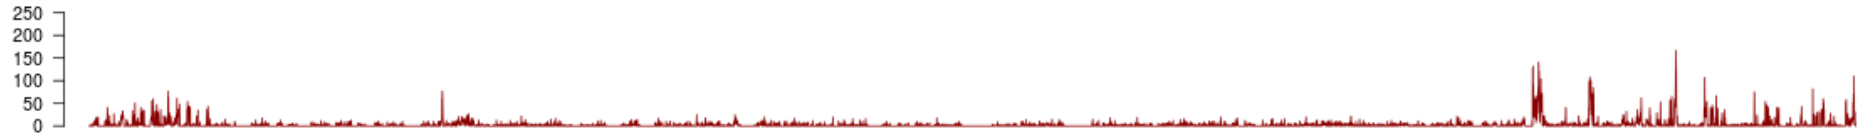

H15

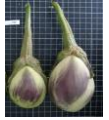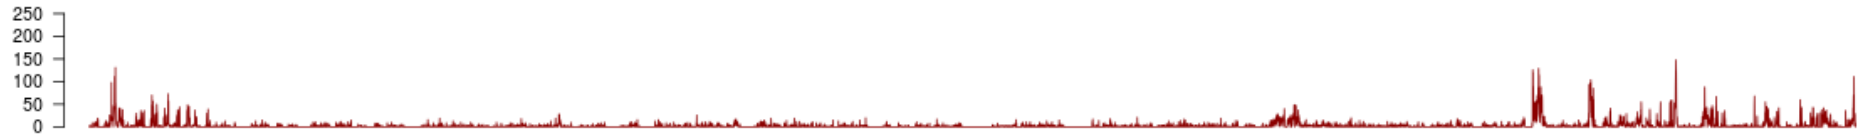

A0416

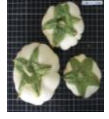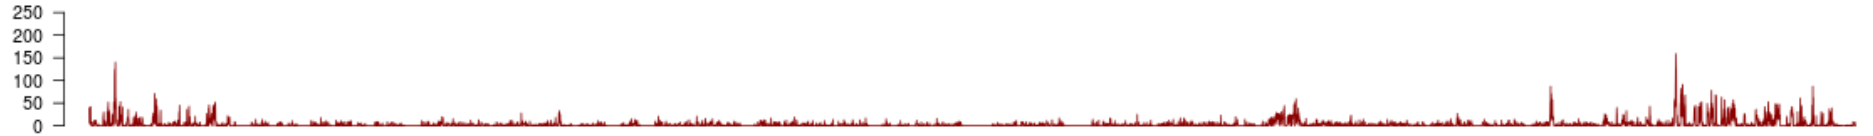

IVIA-371

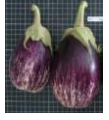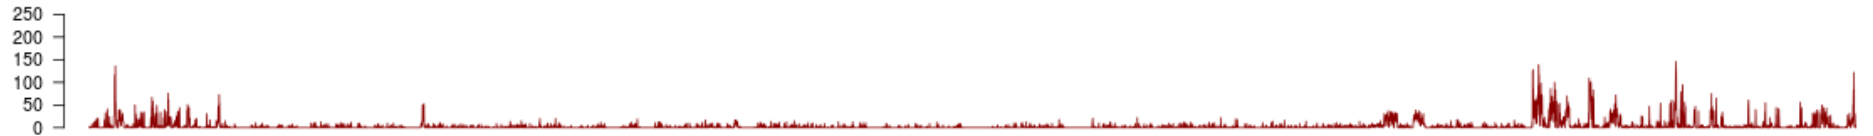

ASI-S-1

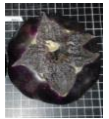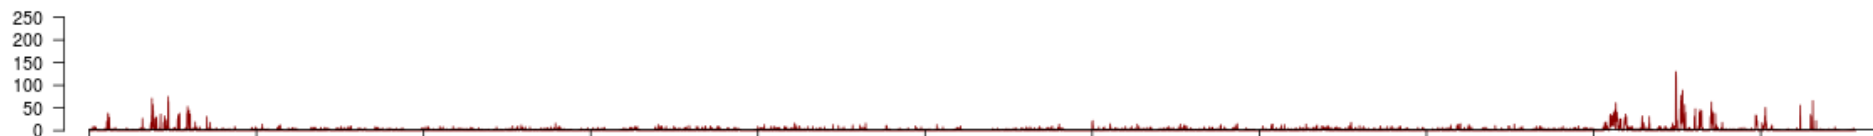

0 10 20 30 40 50 60 70 80 90 100 110

# Chromosome 5 homozygous variants

**MM577**

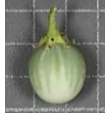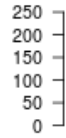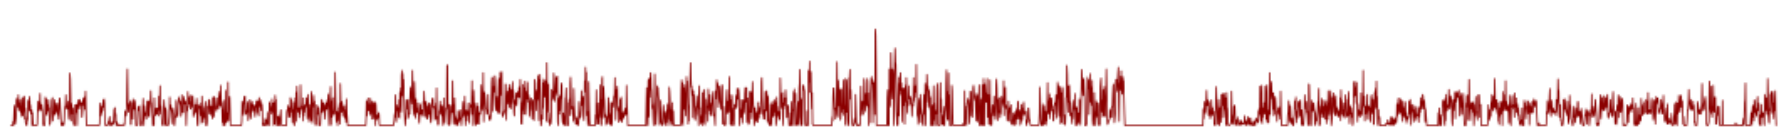

**MM1597**

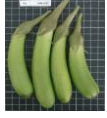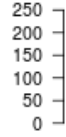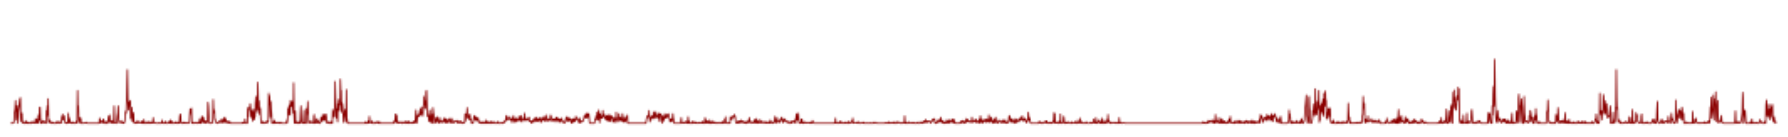

**DH ECAVI**

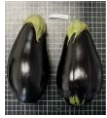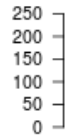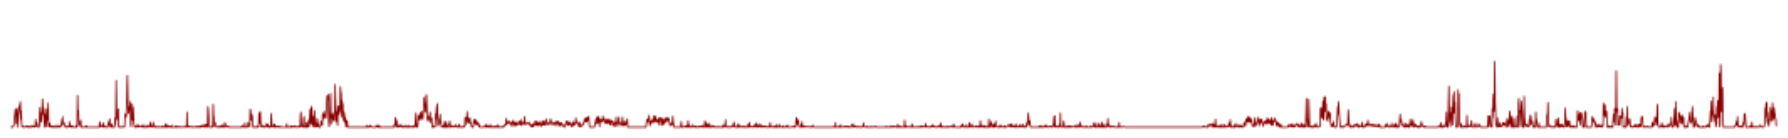

**AN-S-26**

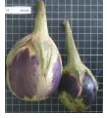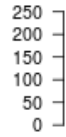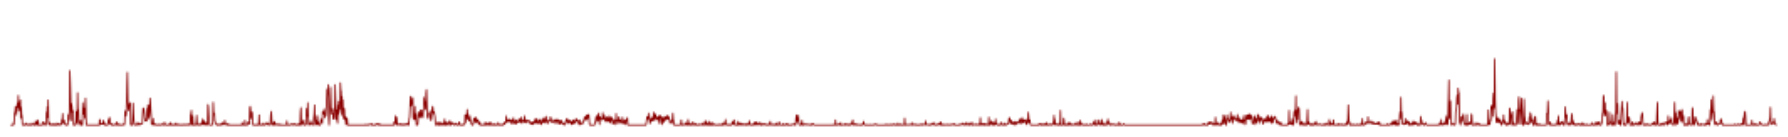

**H15**

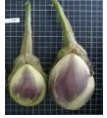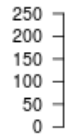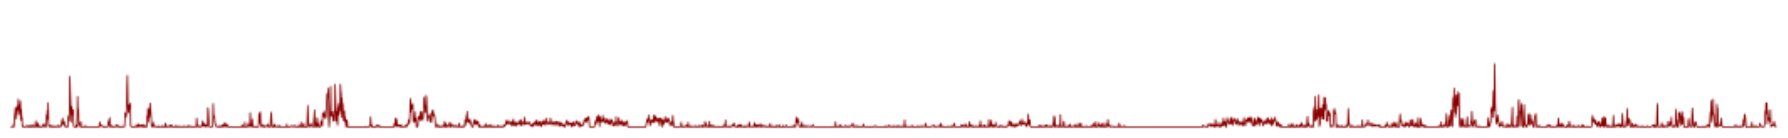

**A0416**

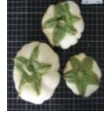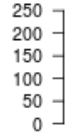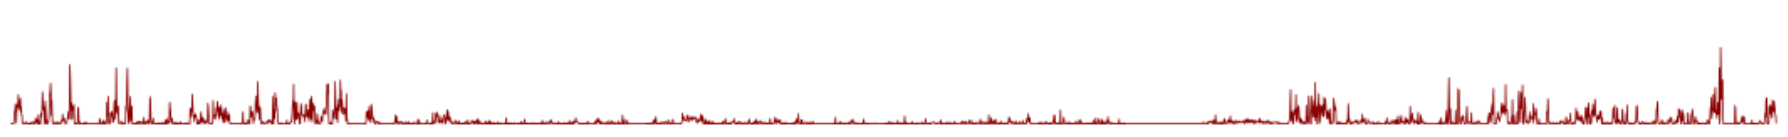

**IVIA-371**

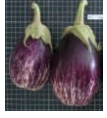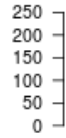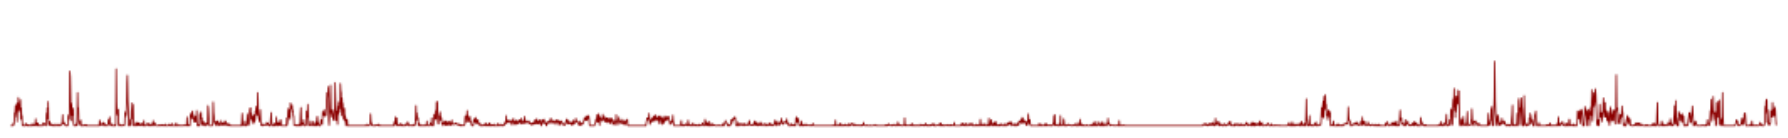

**ASI-S-1**

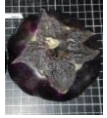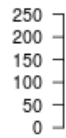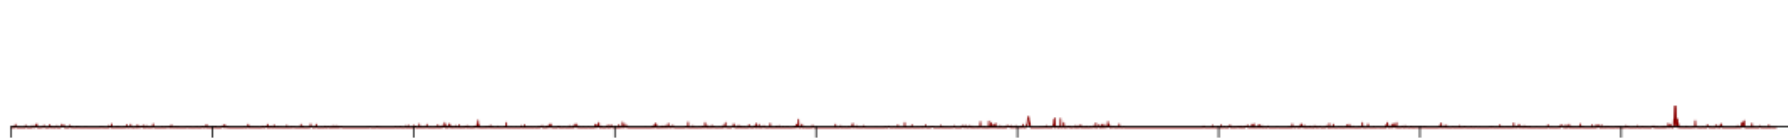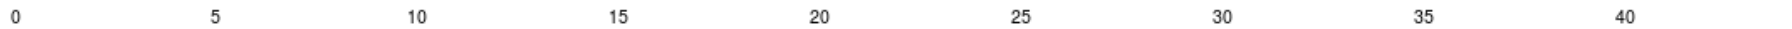

# Chromosome 6 homozygous variants

MM577

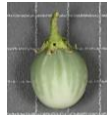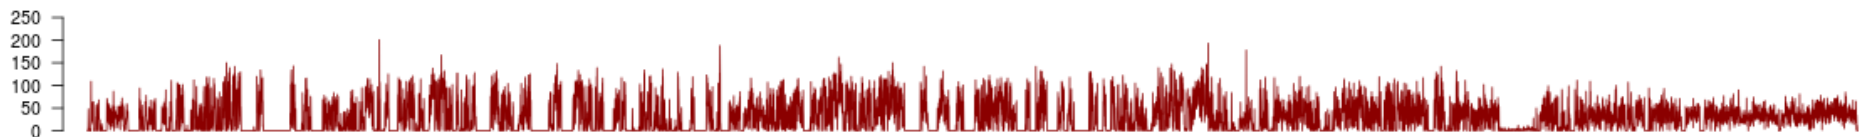

MM1597

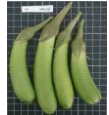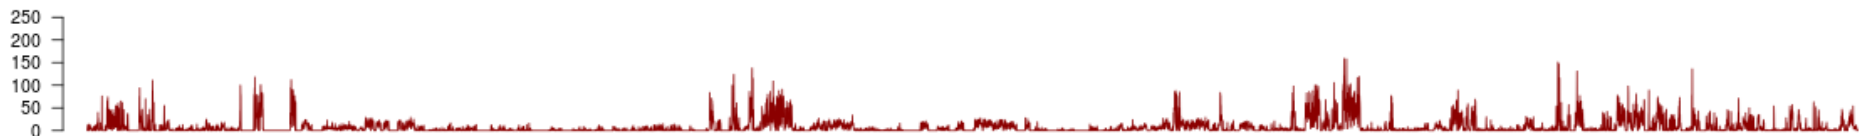

DH ECAVI

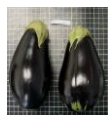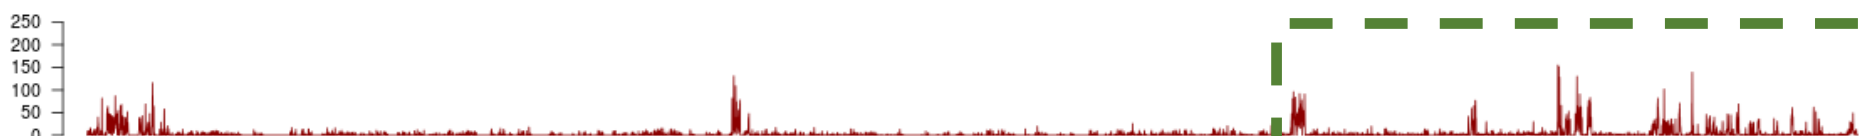

AN-S-26

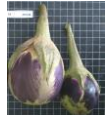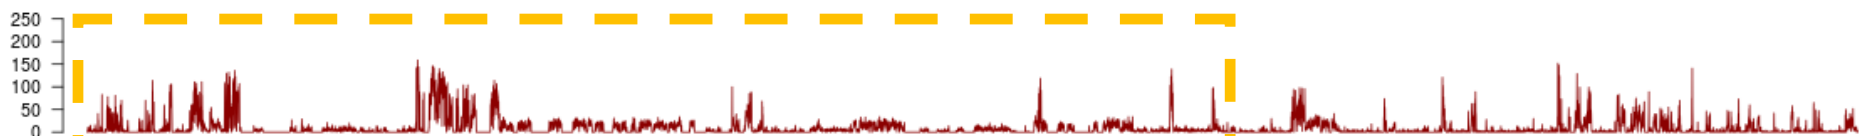

H15

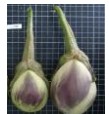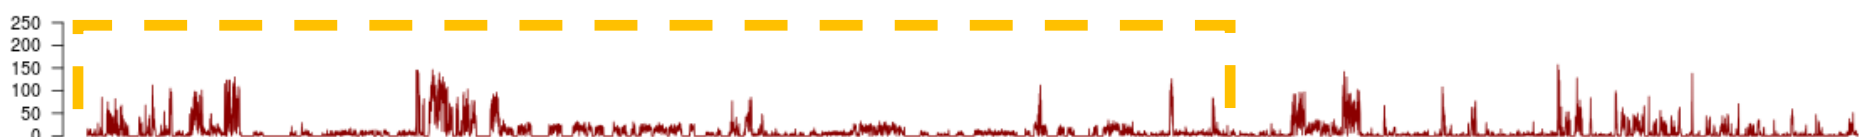

A0416

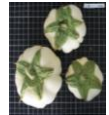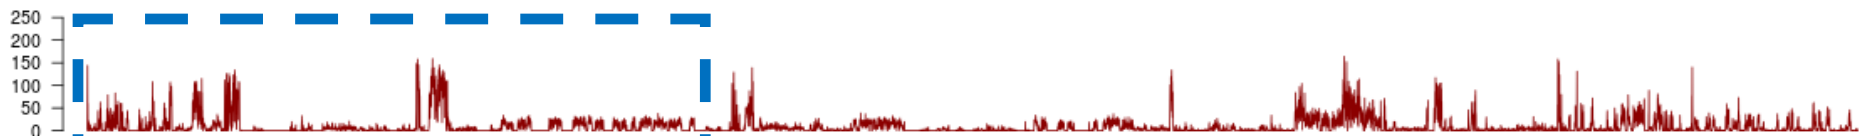

IVIA-371

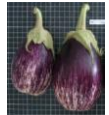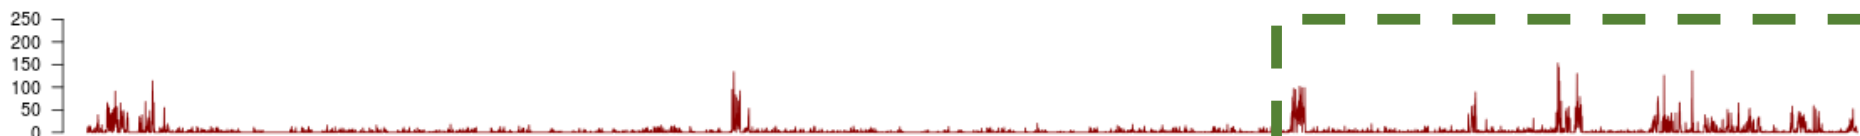

ASI-S-1

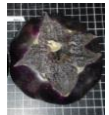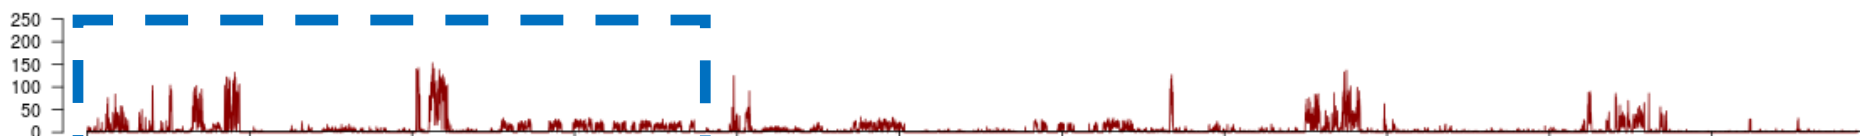

0 10 20 30 40 50 60 70 80 90 100 110

# Chromosome 7 homozygous variants

MM577

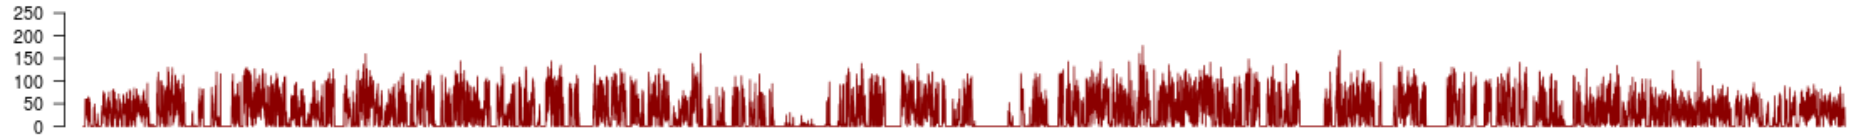

MM1597

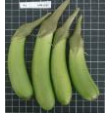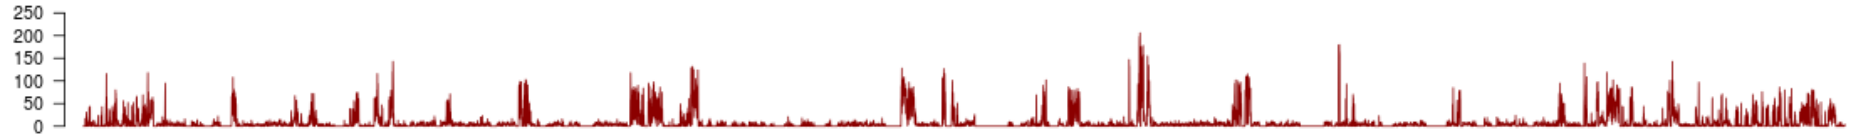

DH ECAVI

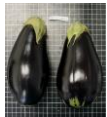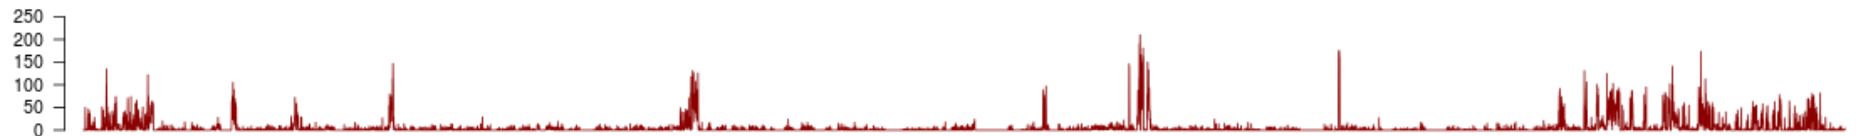

AN-S-26

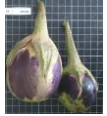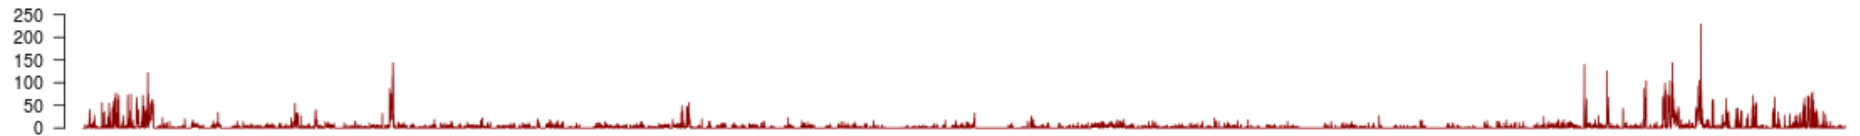

H15

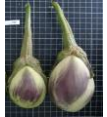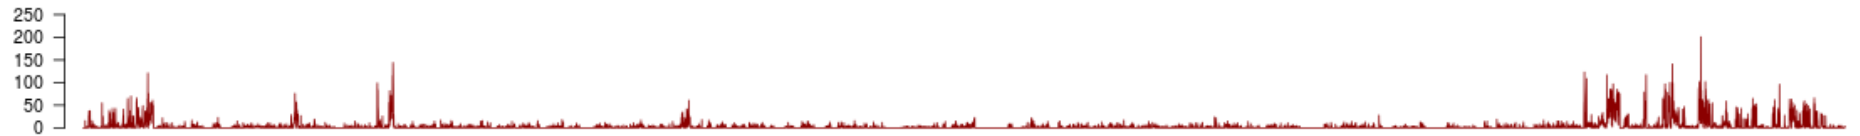

A0416

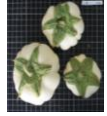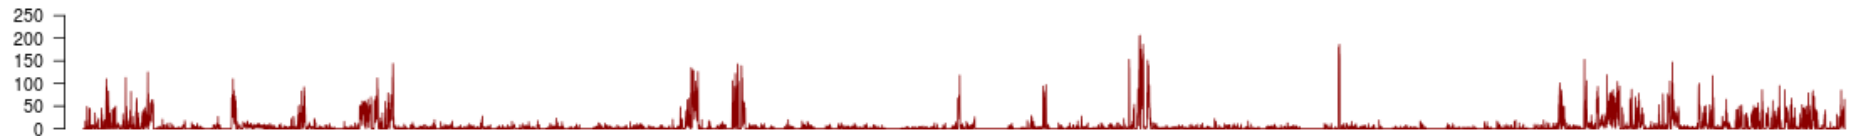

IVIA-371

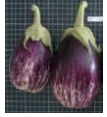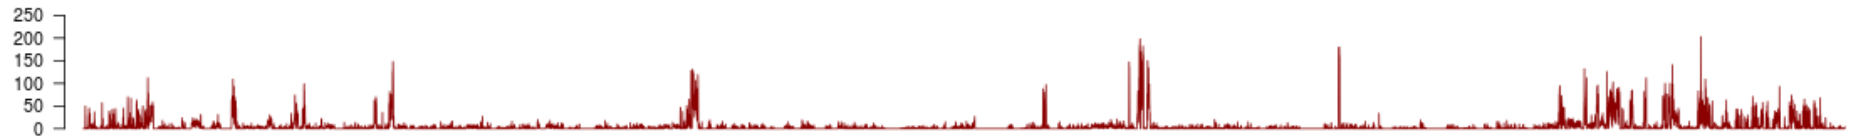

ASI-S-1

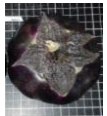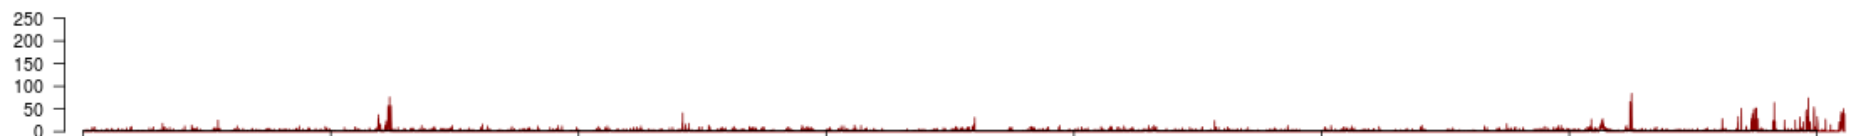

0 20 40 60 80 100 120 140



# Chromosome 8 homozygous variants

MM577

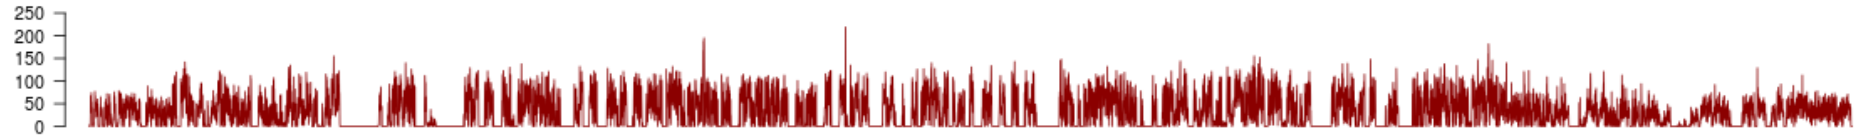

MM1597

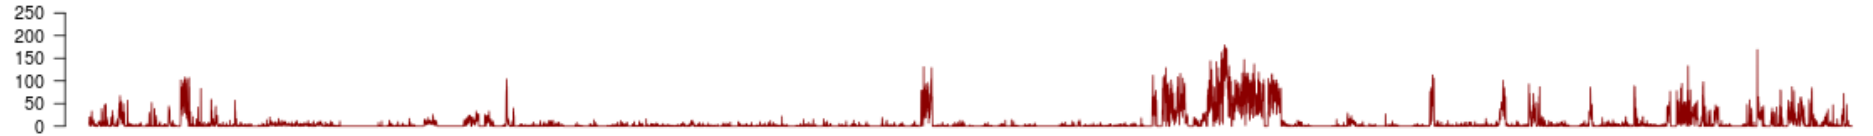

DH ECAVI

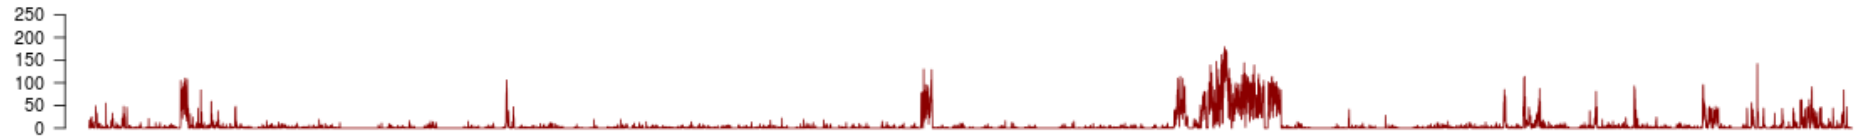

AN-S-26

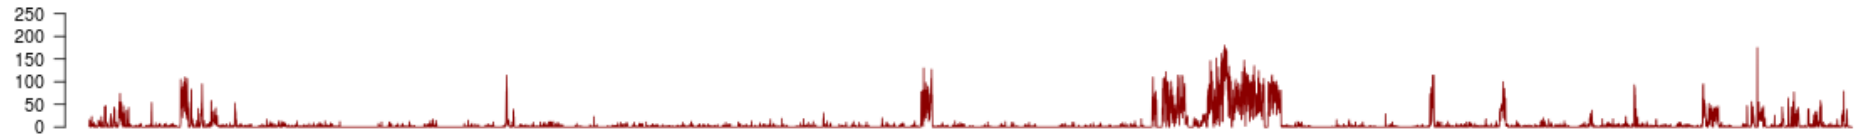

H15

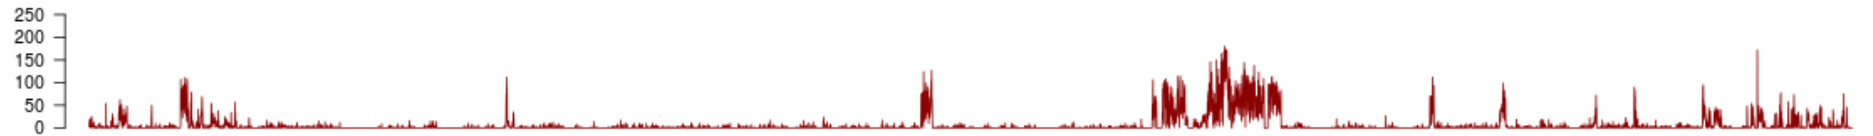

A0416

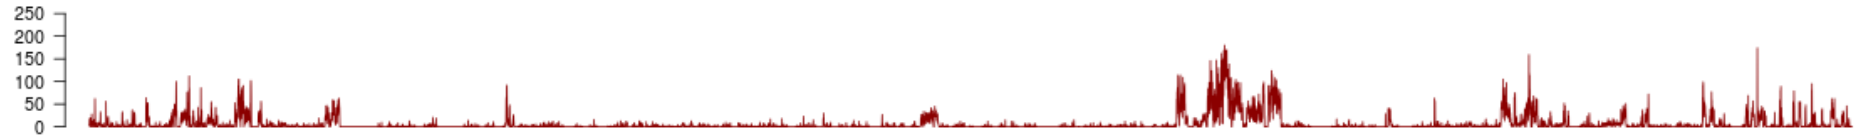

IVIA-371

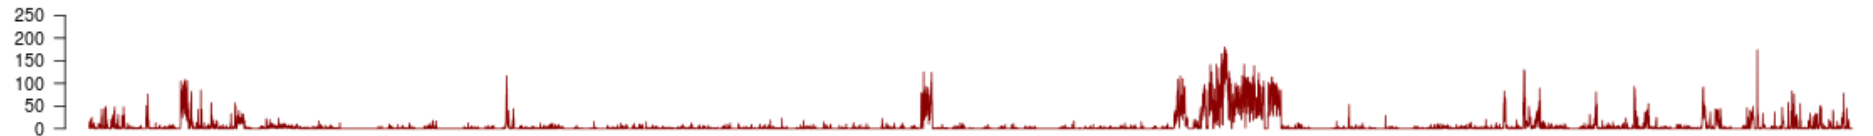

ASI-S-1

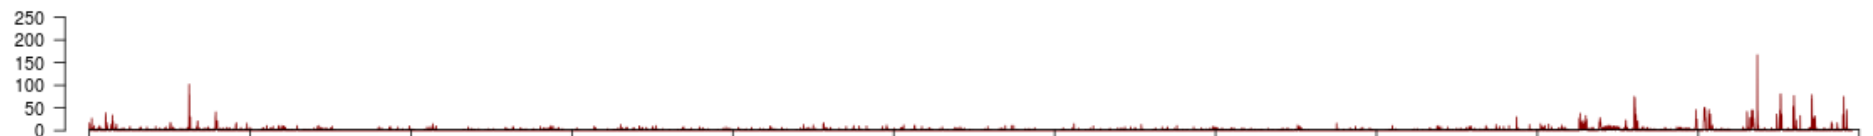

0 10 20 30 40 50 60 70 80 90 100 110

# Chromosome 9 homozygous variants

MM577

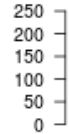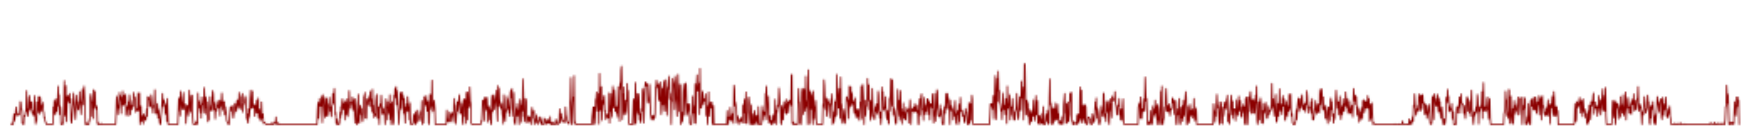

MM1597

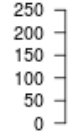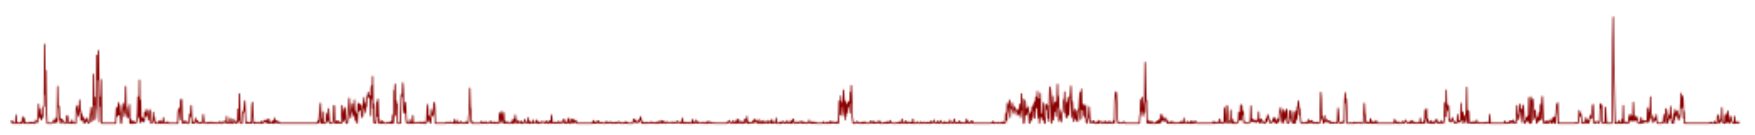

DH ECAVI

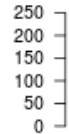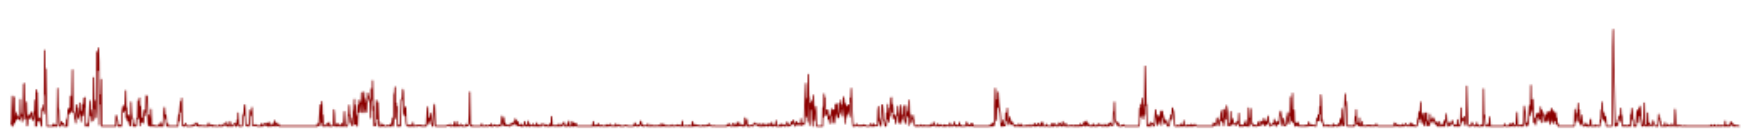

AN-S-26

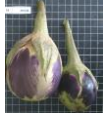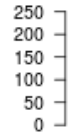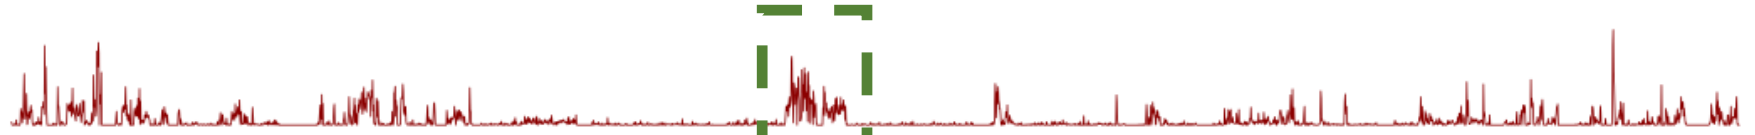

H15

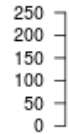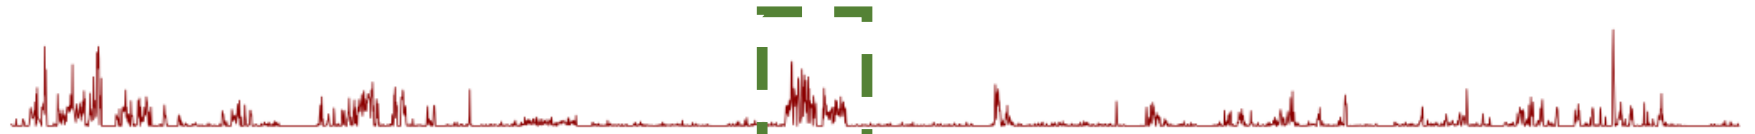

A0416

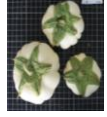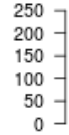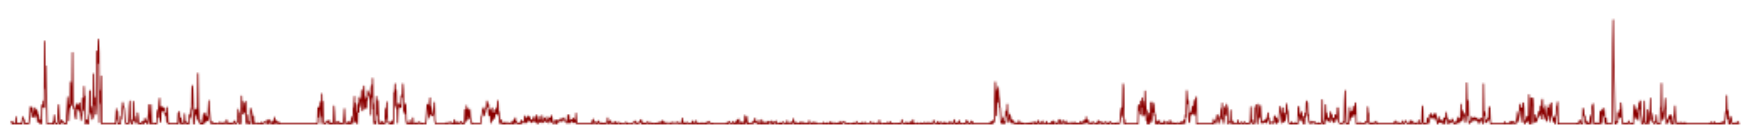

IVIA-371

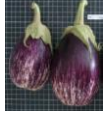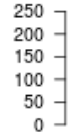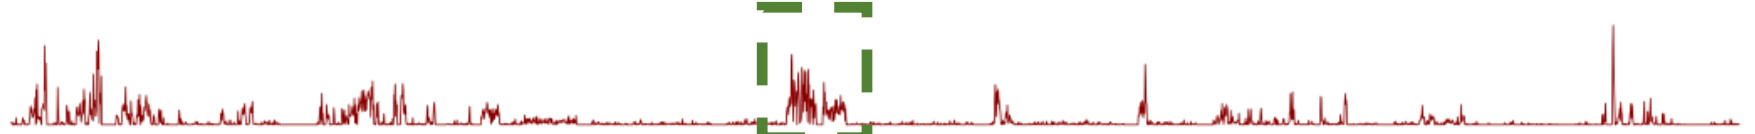

ASI-S-1

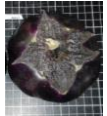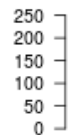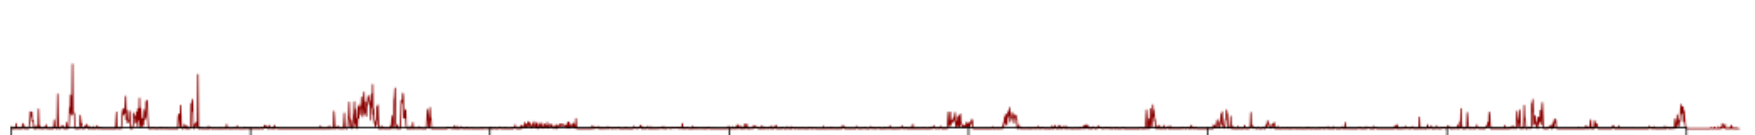

0 5 10 15 20 25 30 35

# Chromosome 10 homozygous variants

**MM577**

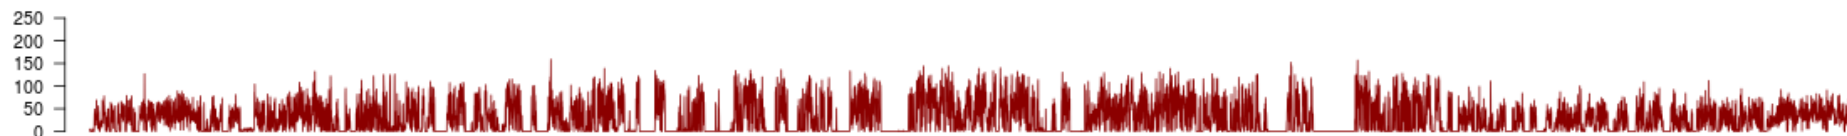

**MM1597**

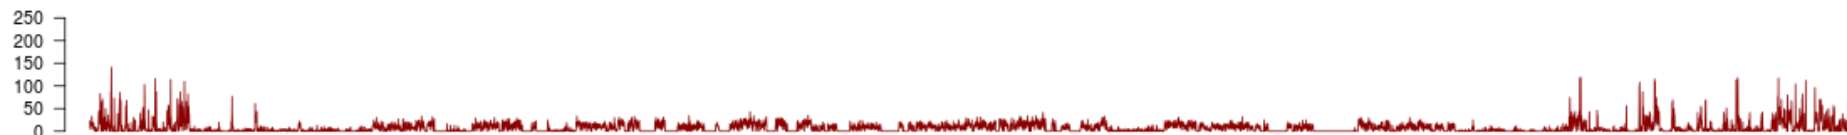

**DH ECAVI**

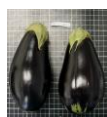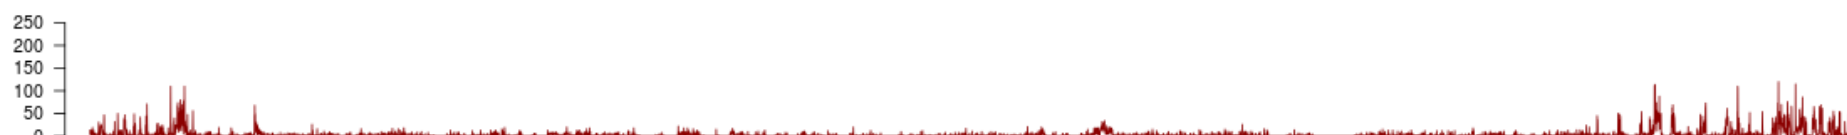

**AN-S-26**

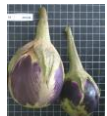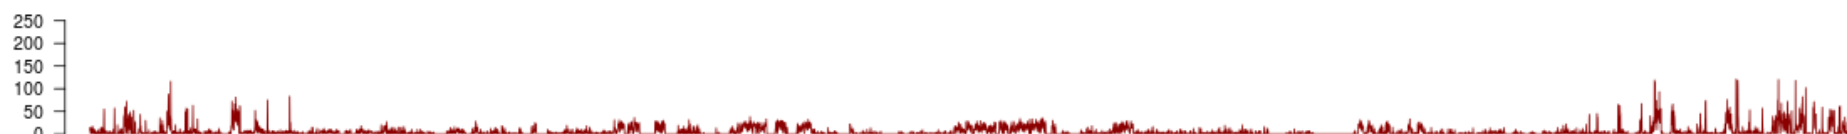

**H15**

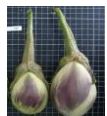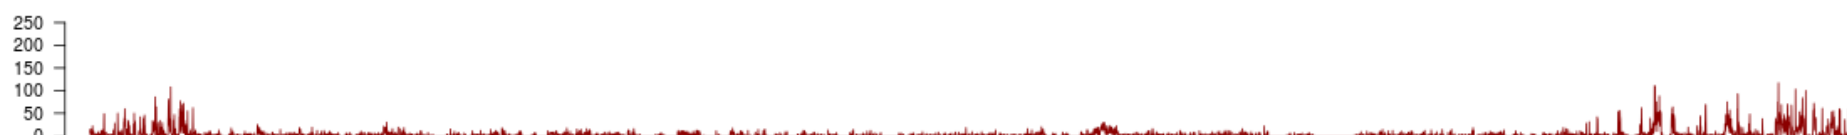

**A0416**

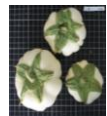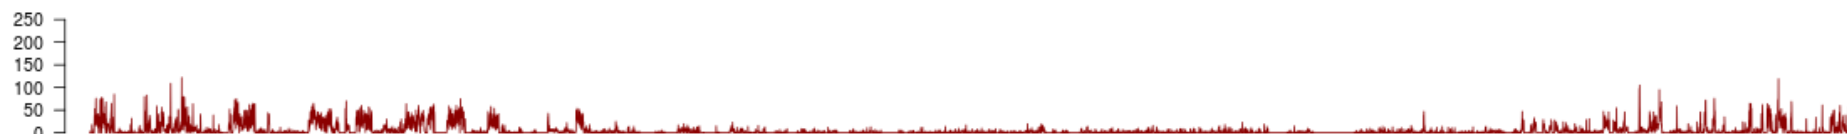

**IVIA-371**

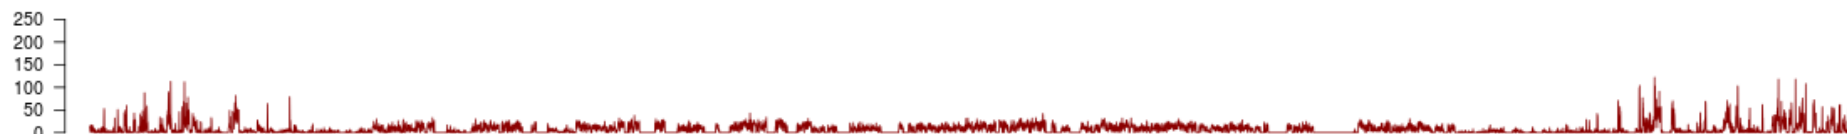

**ASI-S-1**

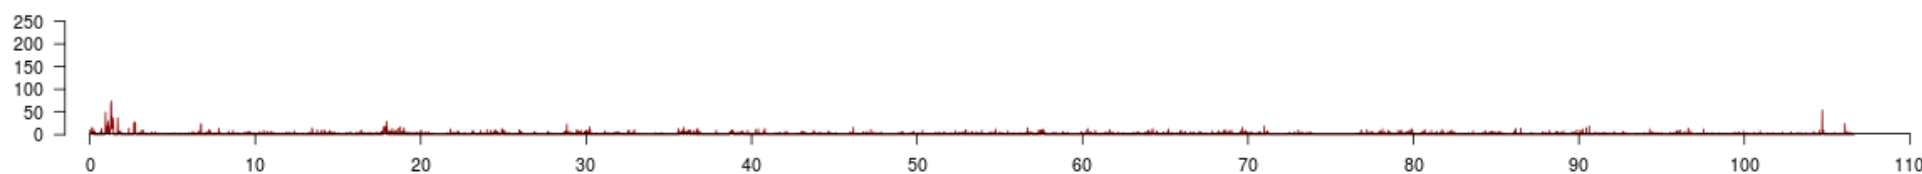

# Chromosome 11 homozygous variants

MM577

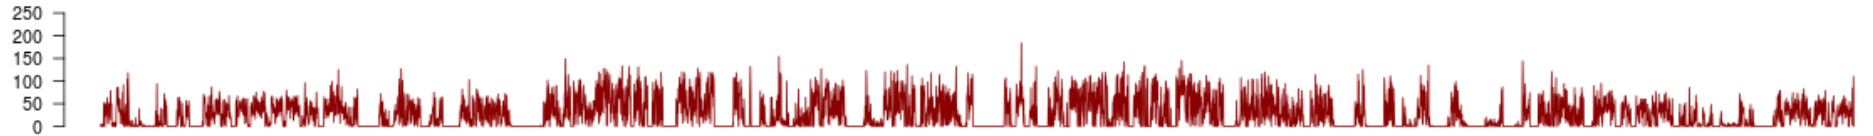

MM1597

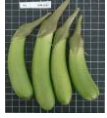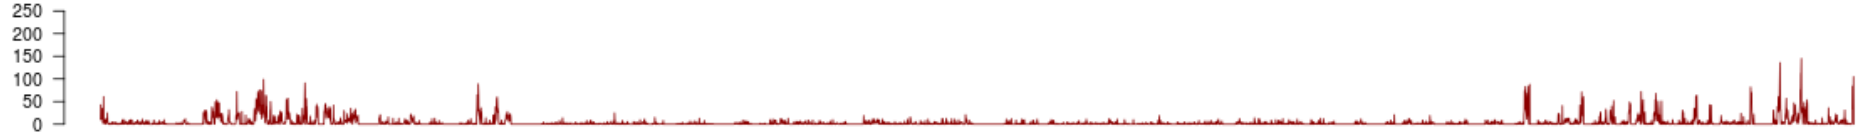

DH ECAVI

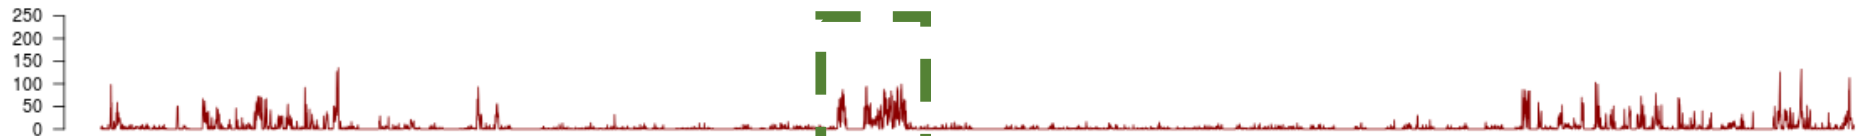

AN-S-26

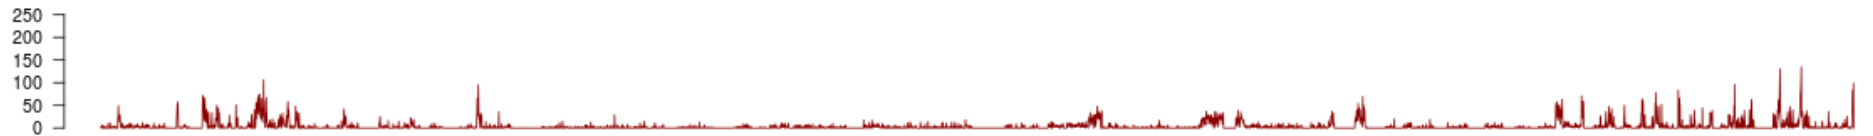

H15

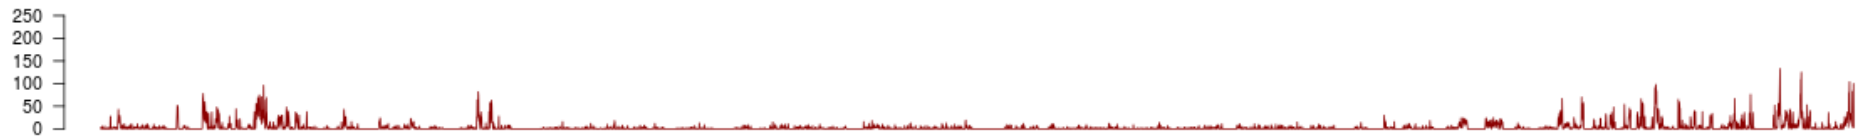

A0416

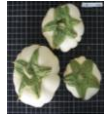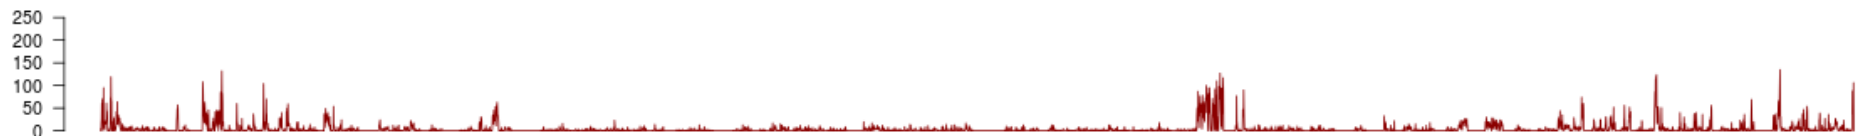

IVIA-371

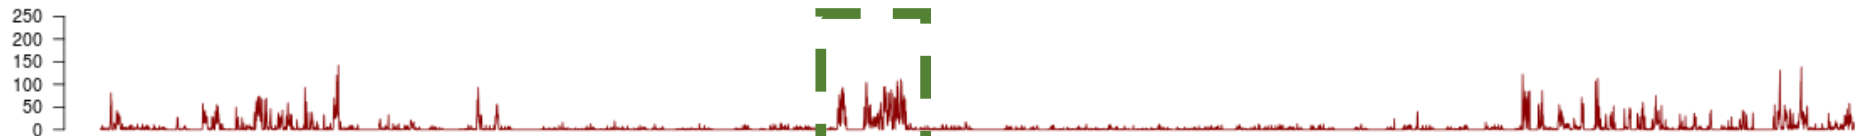

ASI-S-1

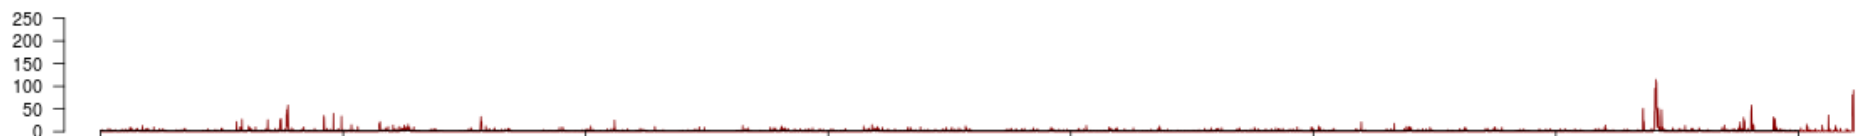

0 10 20 30 40 50 60 70

# Chromosome 12 homozygous variants

MM577

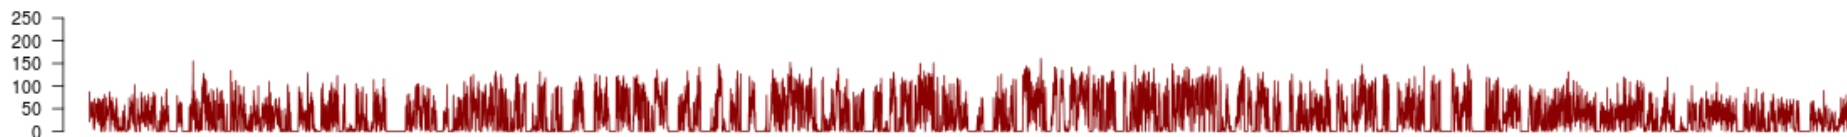

MM1597

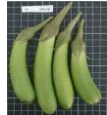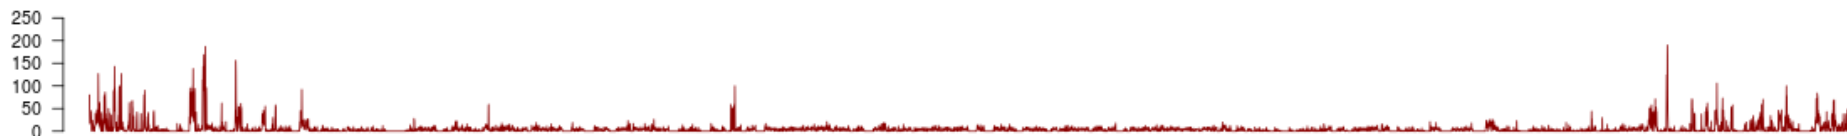

DH ECAVI

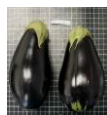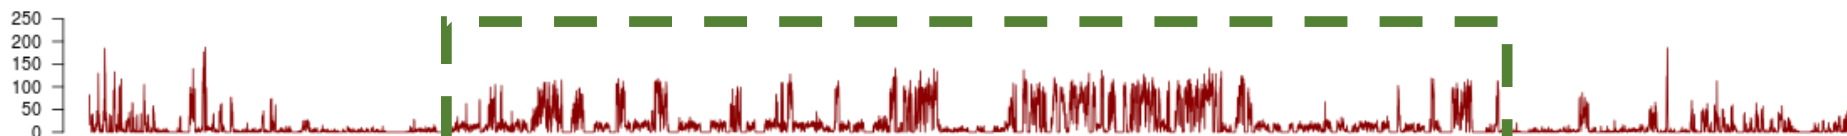

AN-S-26

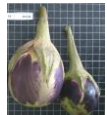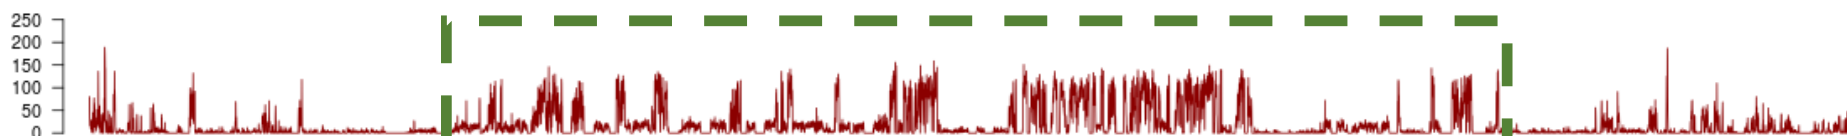

H15

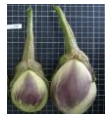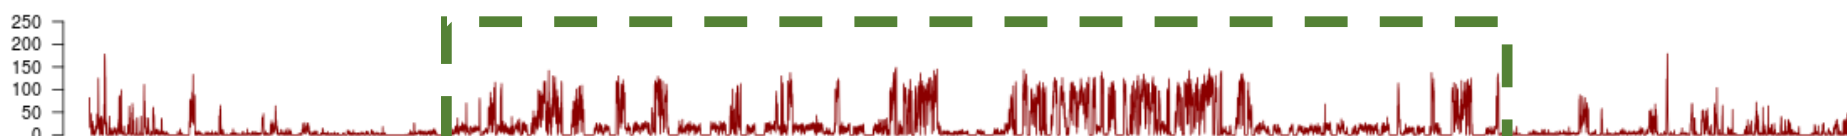

A0416

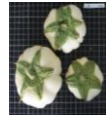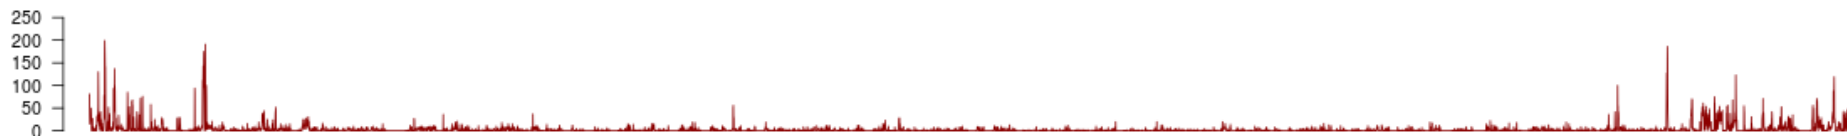

IVIA-371

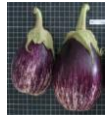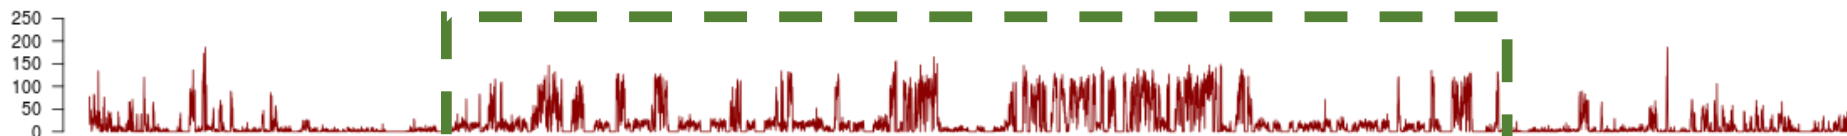

ASI-S-1

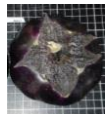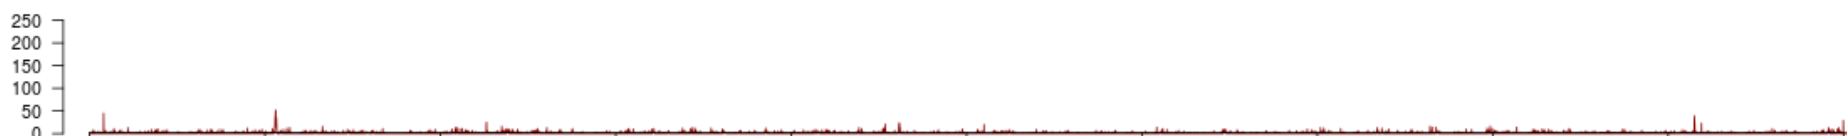

0 10 20 30 40 50 60 70 80 90 100

# Chromosome 1 heterozygous variants

**MM577**

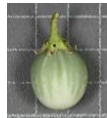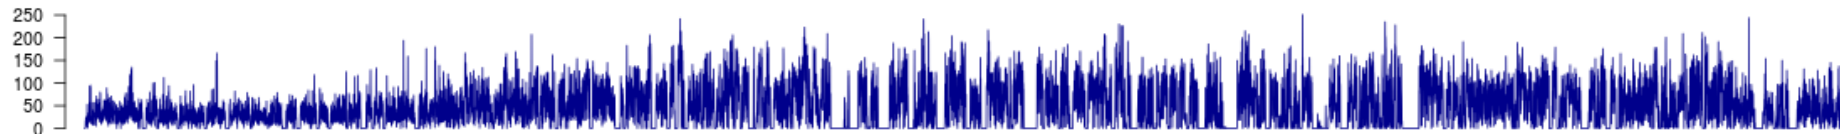

**MM1597**

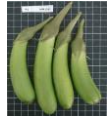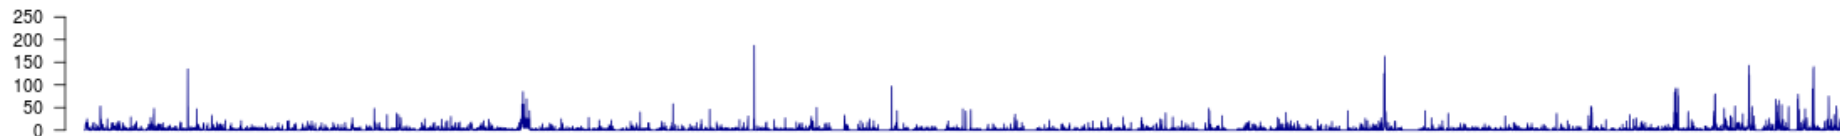

**DH ECAVI**

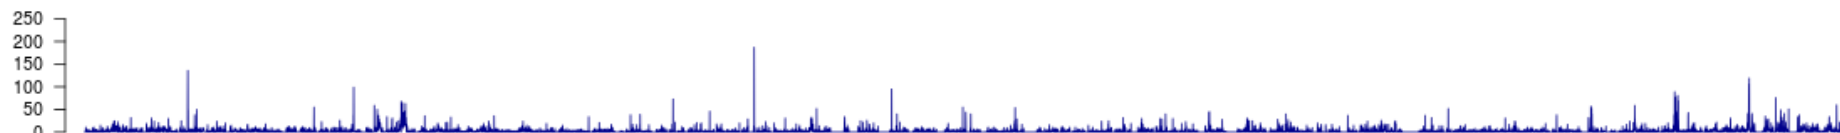

**AN-S-26**

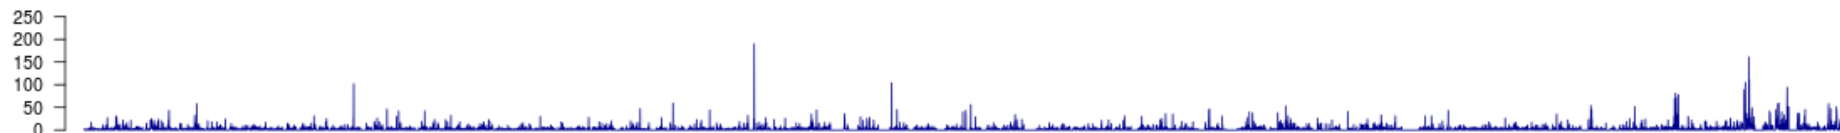

**H15**

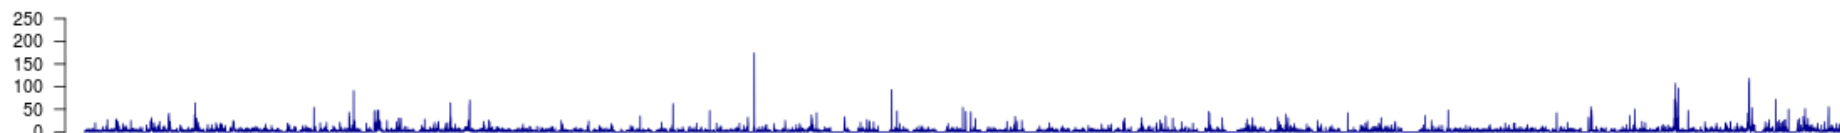

**A0416**

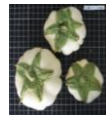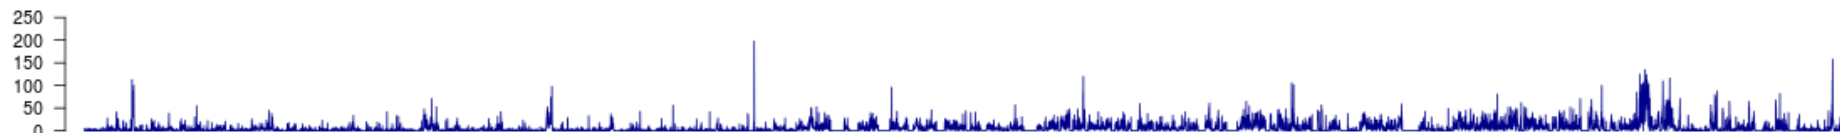

**IVIA-371**

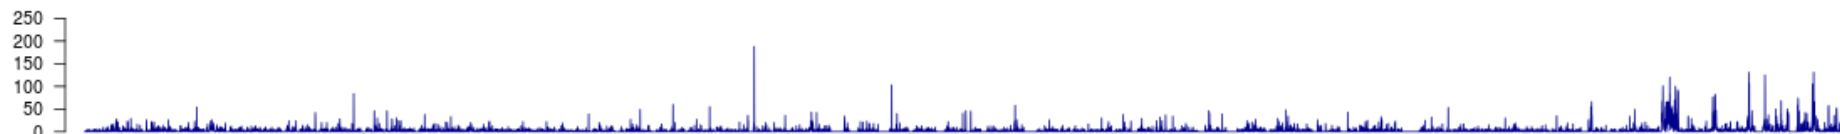

**ASI-S-1**

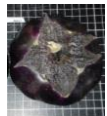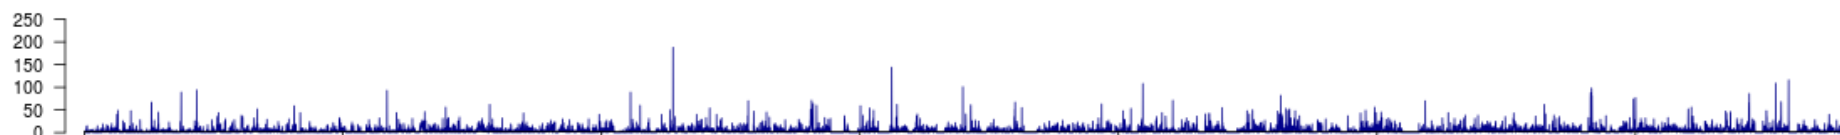

0 20 40 60 80 100 120 140

# Chromosome 2 heterozygous variants

MM577

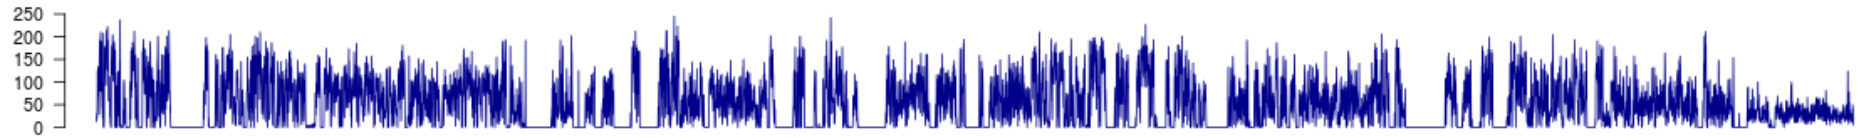

MM1597

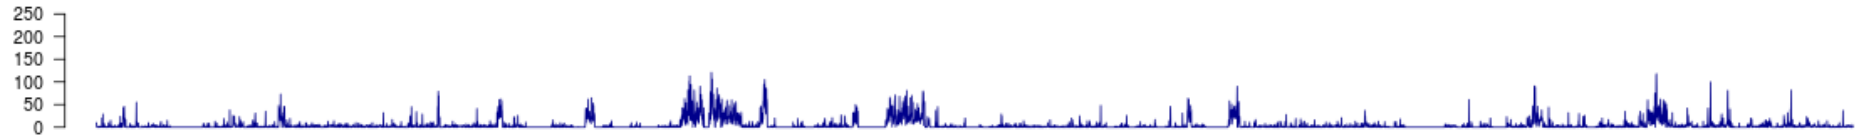

DH ECAVI

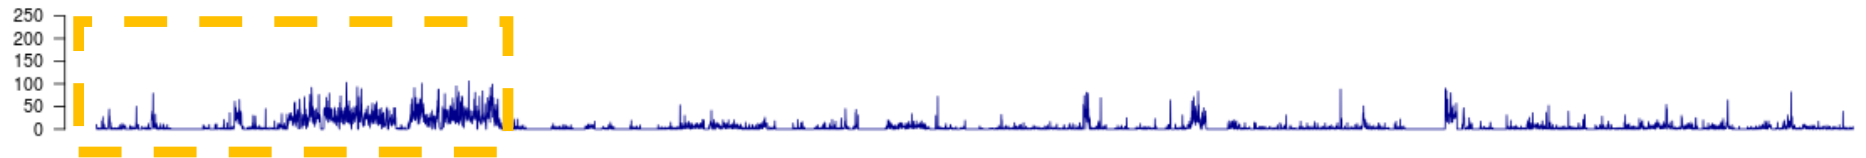

AN-S-26

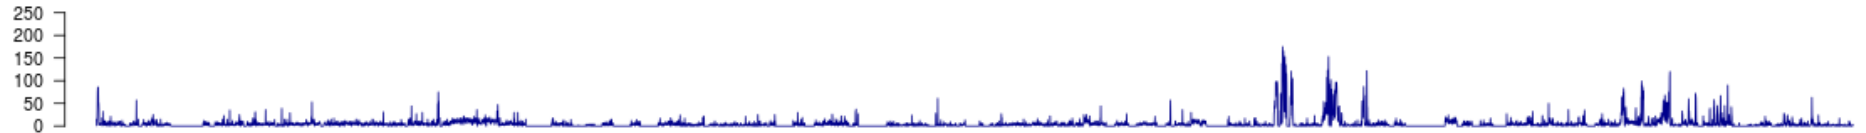

H15

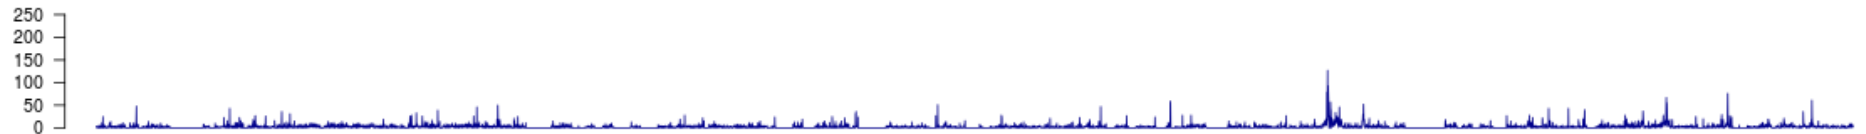

A0416

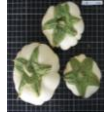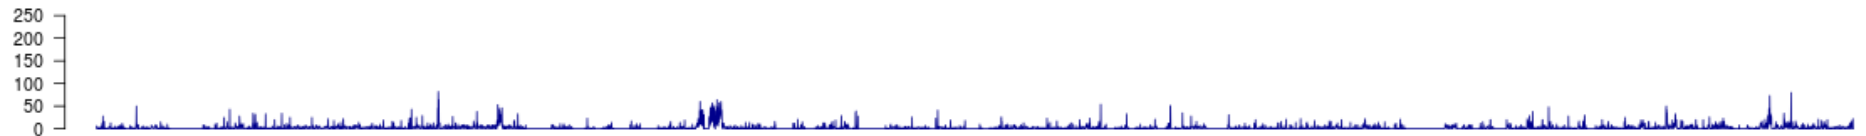

IVIA-371

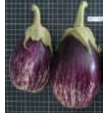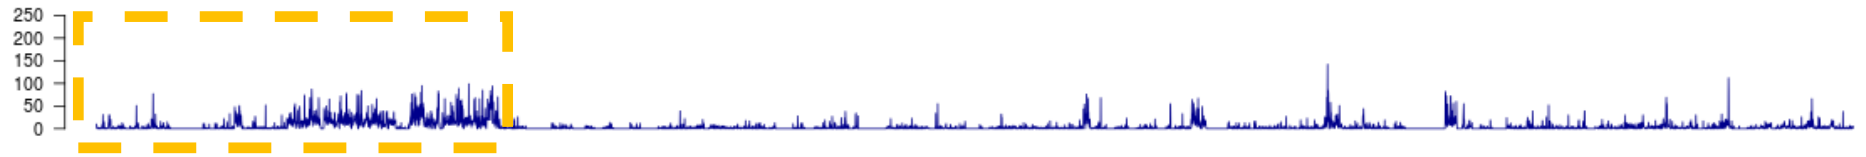

ASI-S-1

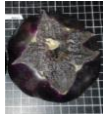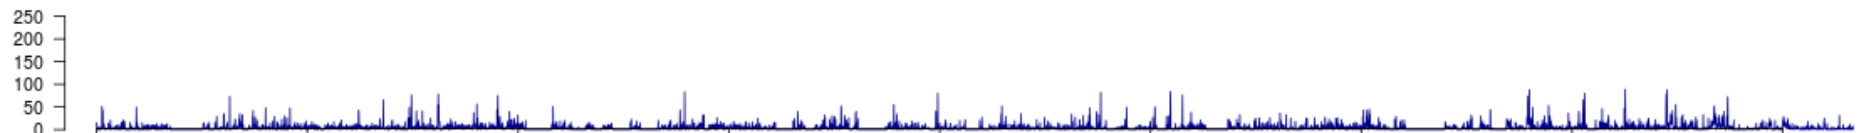

0 10 20 30 40 50 60 70 80

# Chromosome 3 heterozygous variants

MM577

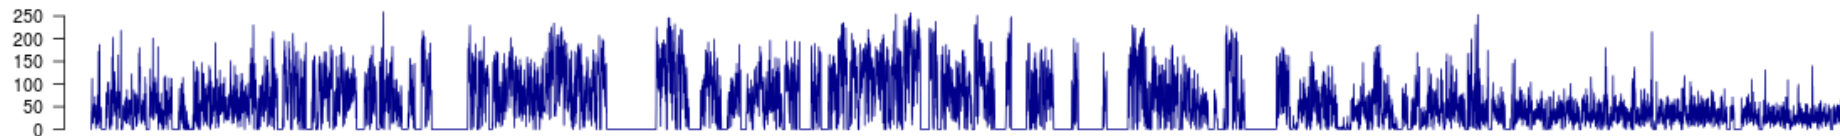

MM1597

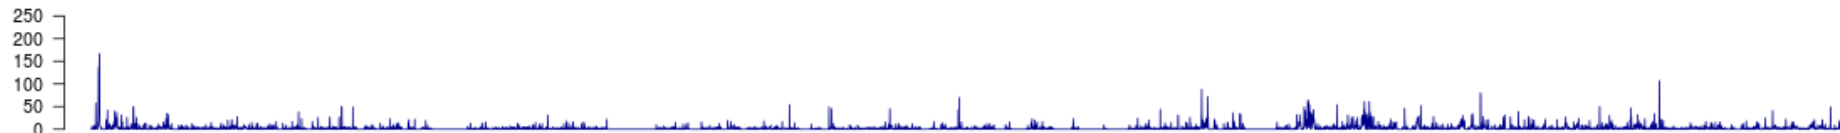

DH ECAVI

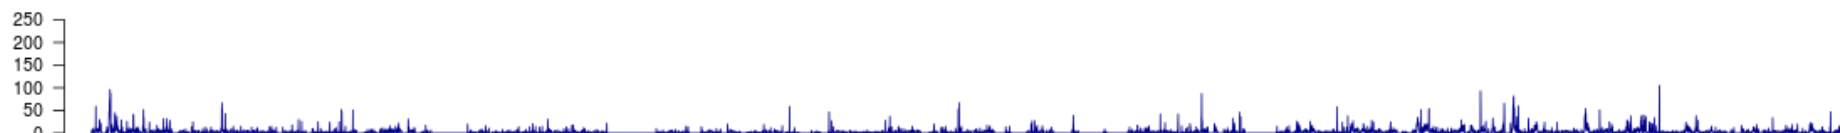

AN-S-26

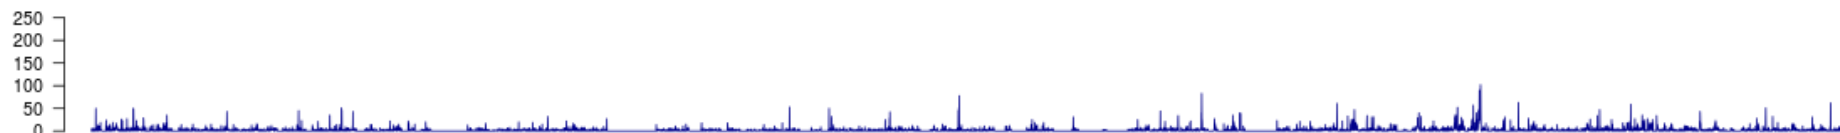

H15

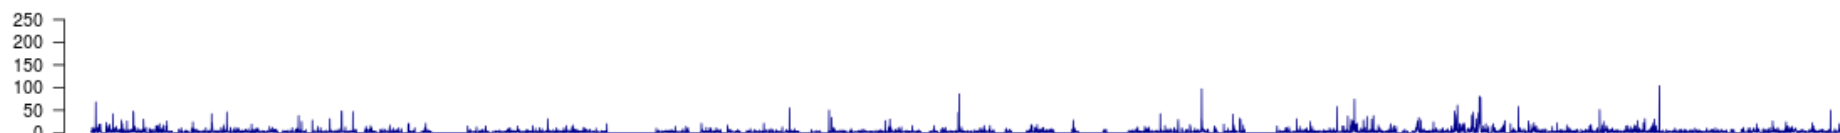

A0416

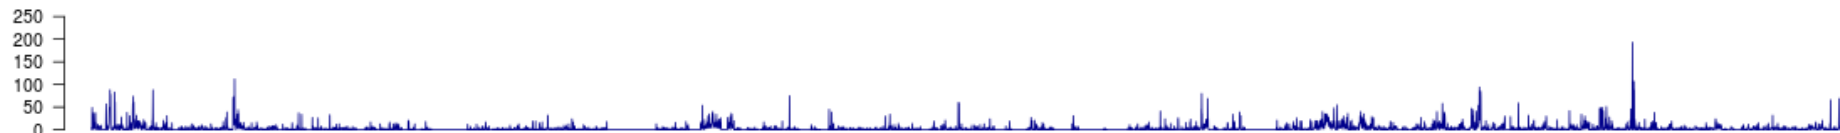

IVIA-371

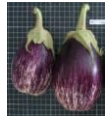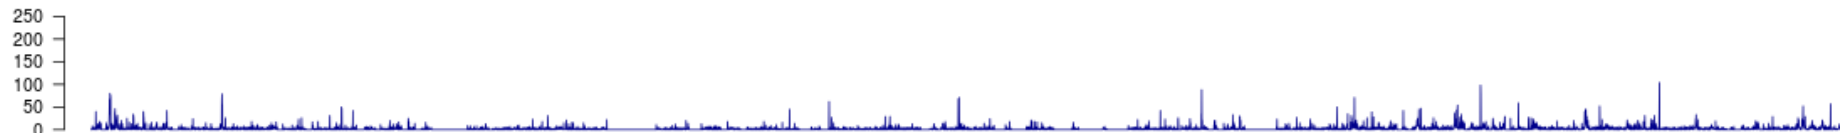

ASI-S-1

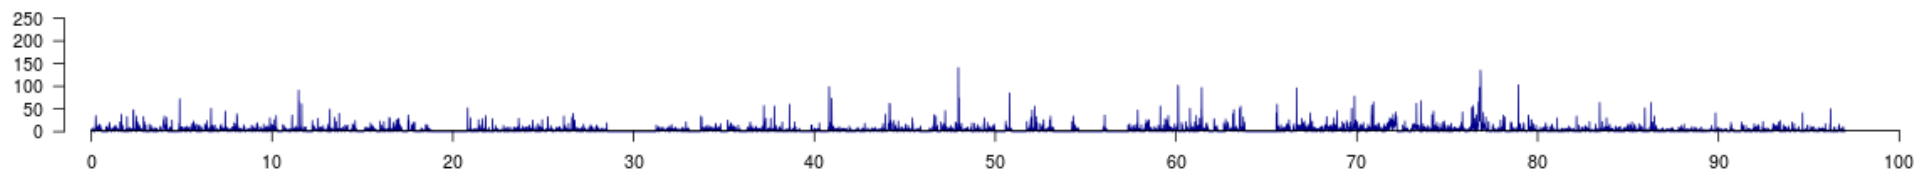



# Chromosome 4 heterozygous variants

MM577

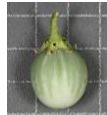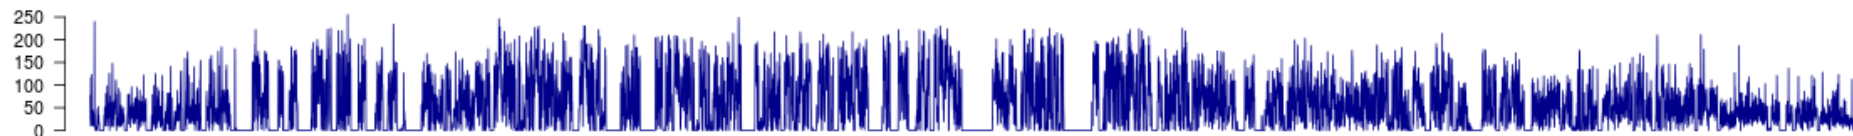

MM1597

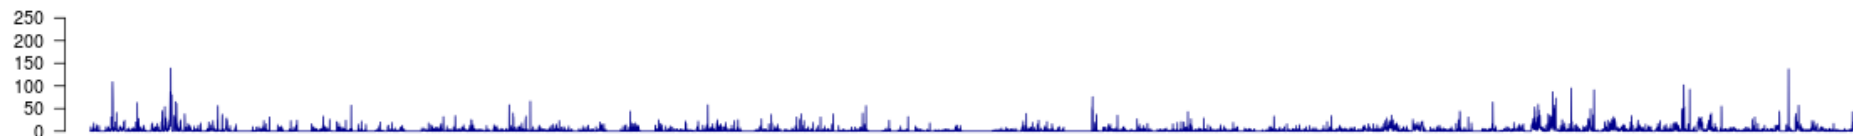

DH ECAVI

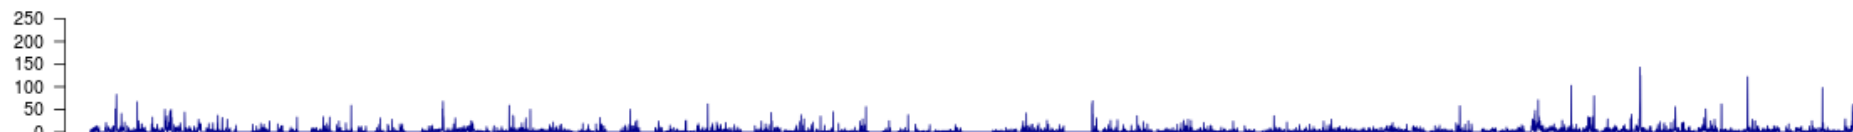

AN-S-26

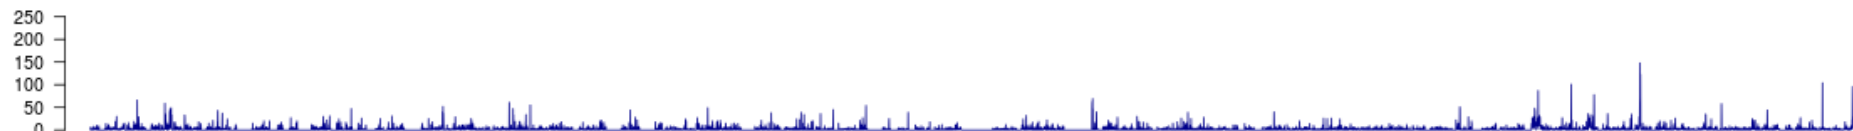

H15

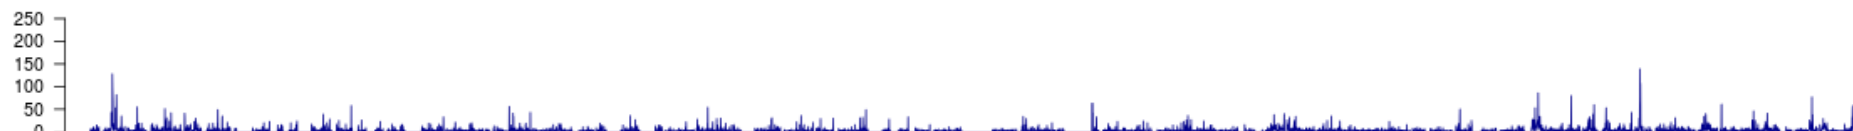

A0416

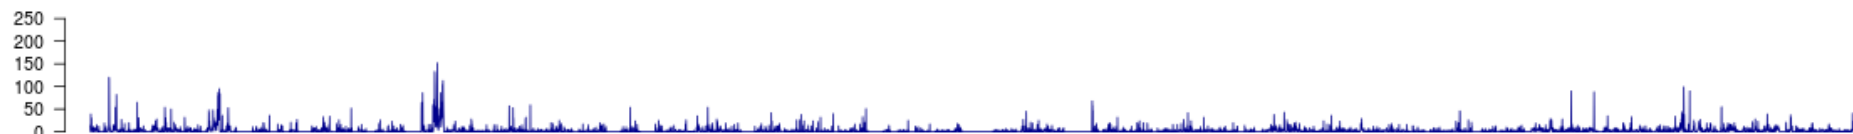

IVIA-371

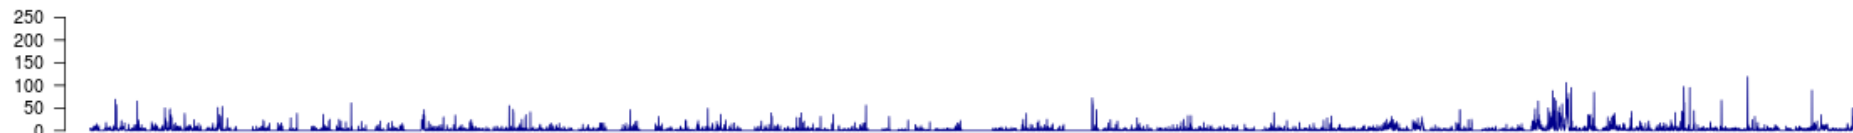

ASI-S-1

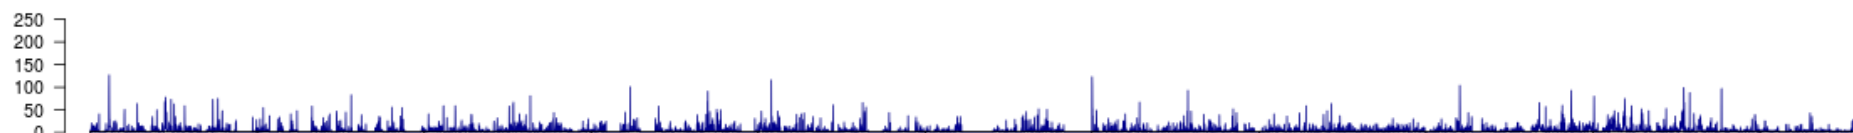

0 10 20 30 40 50 60 70 80 90 100 110

# Chromosome 5 heterozygous variants

**MM577**

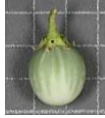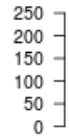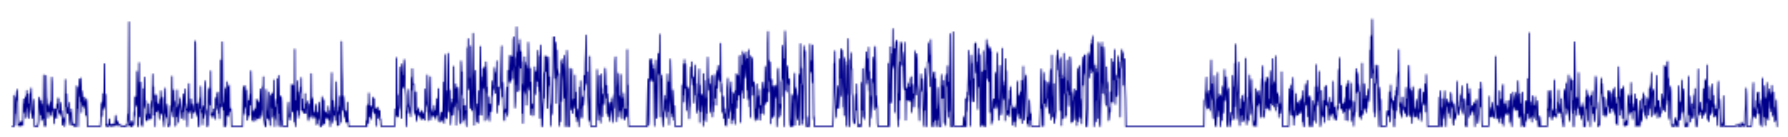

**MM1597**

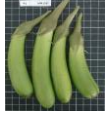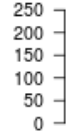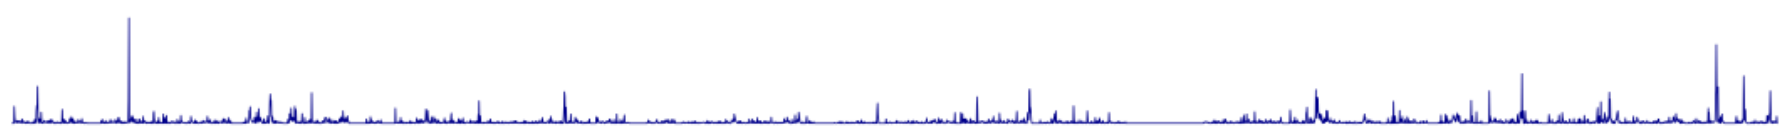

**DH ECAVI**

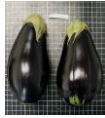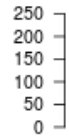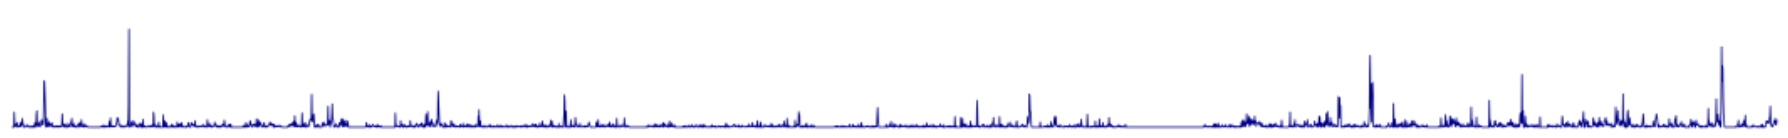

**AN-S-26**

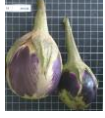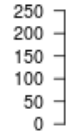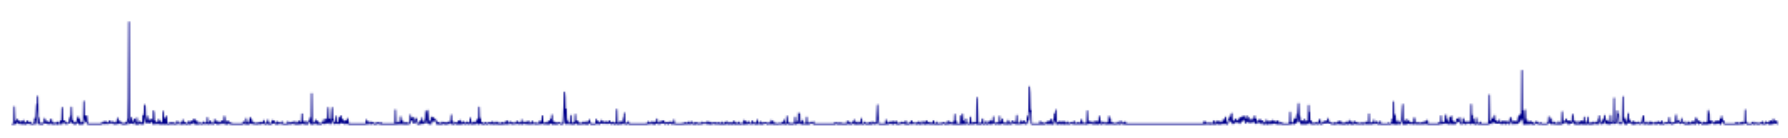

**H15**

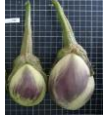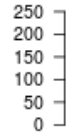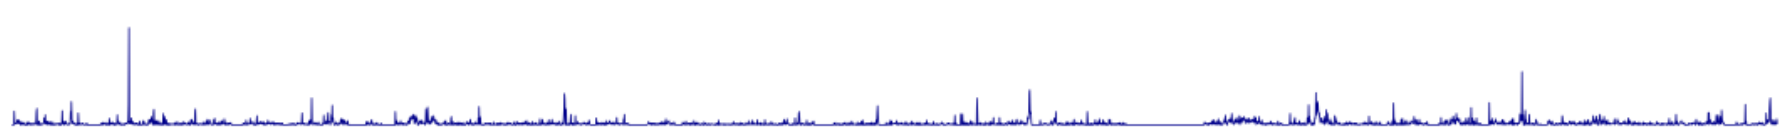

**A0416**

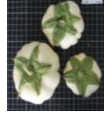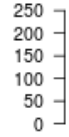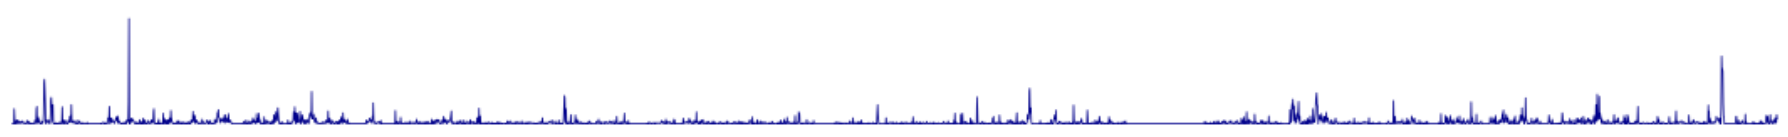

**IVIA-371**

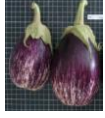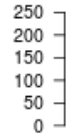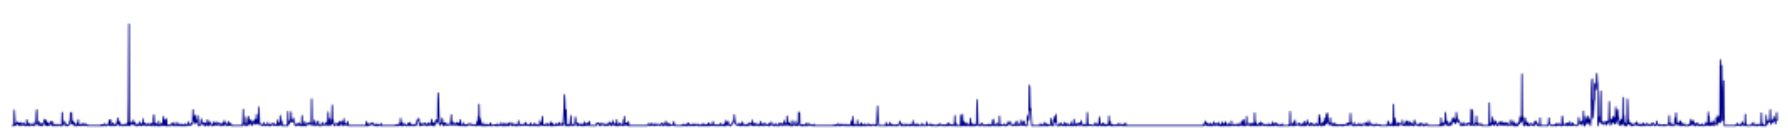

**ASI-S-1**

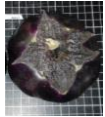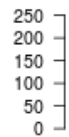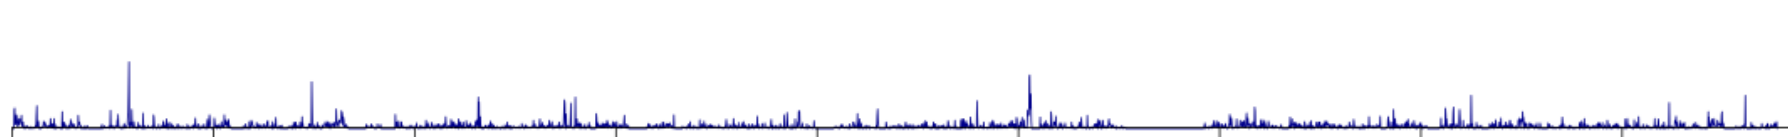

0 5 10 15 20 25 30 35 40

# Chromosome 6 heterozygous variants

MM577

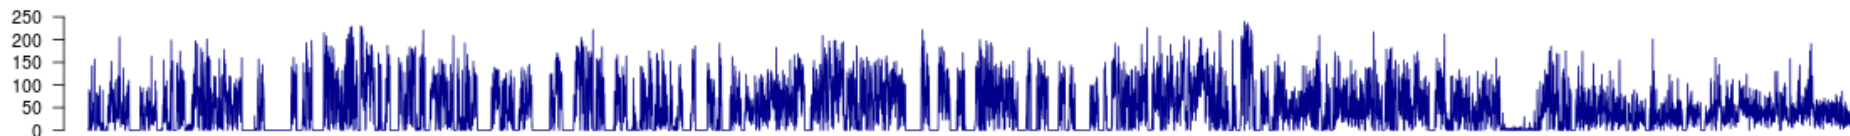

MM1597

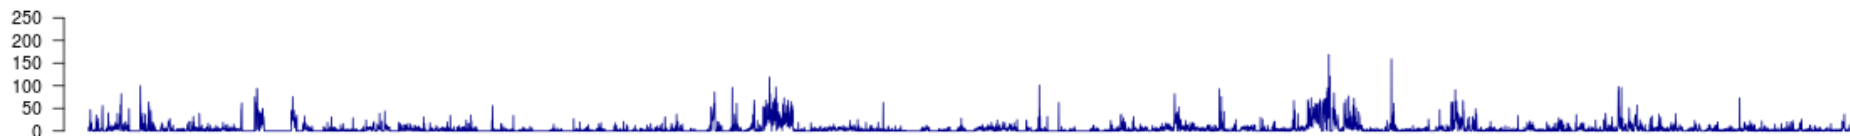

DH ECAVI

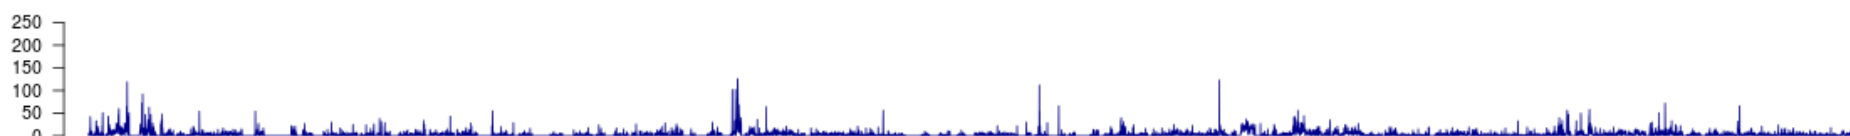

AN-S-26

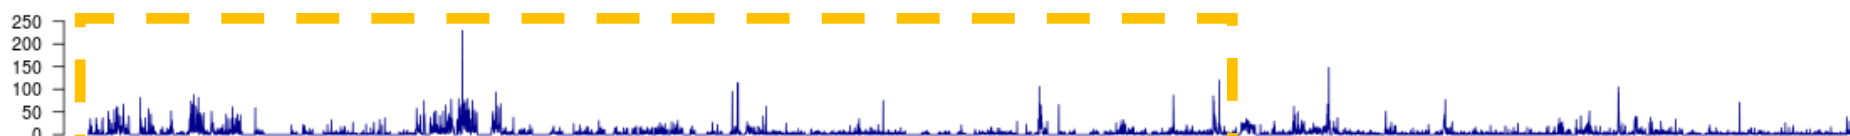

H15

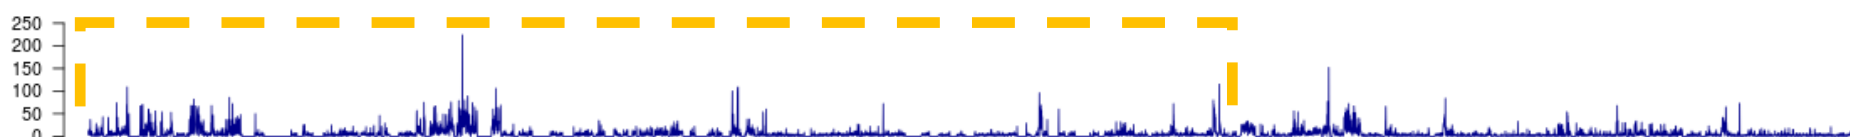

A0416

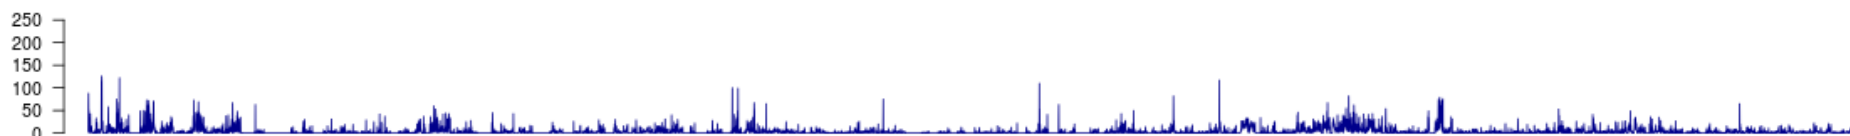

IVIA-371

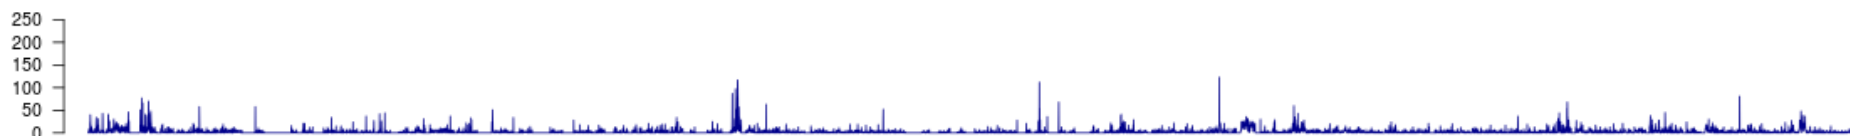

ASI-S-1

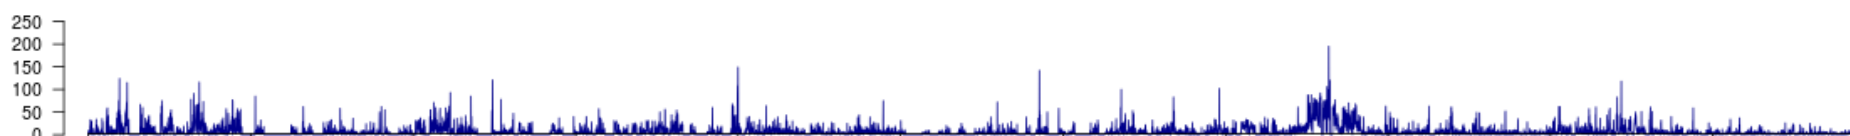

0 10 20 30 40 50 60 70 80 90 100 110

# Chromosome 7 heterozygous variants

MM577

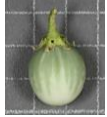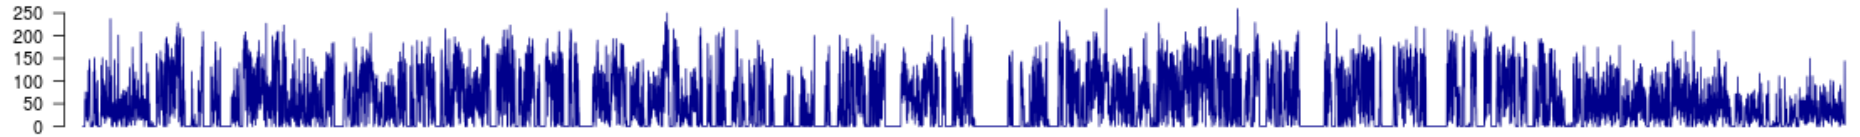

MM1597

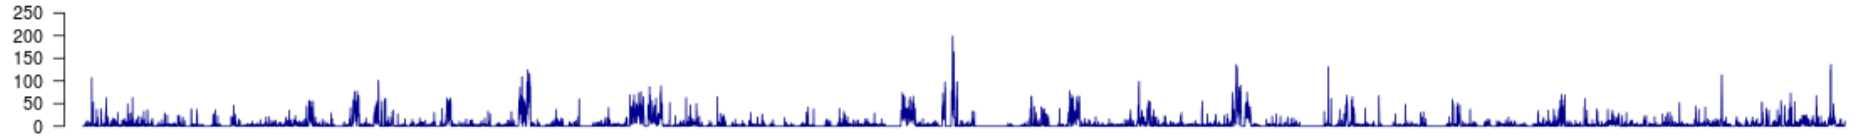

DH ECAVI

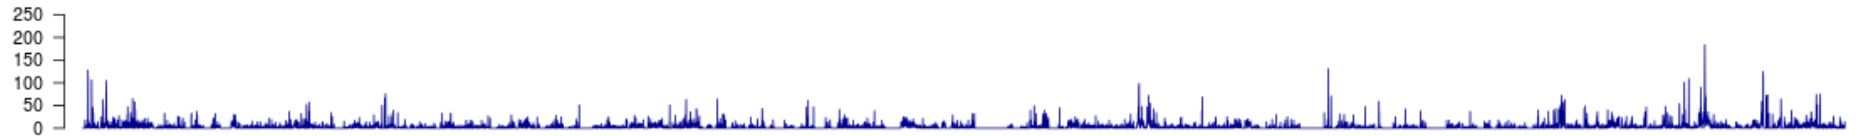

AN-S-26

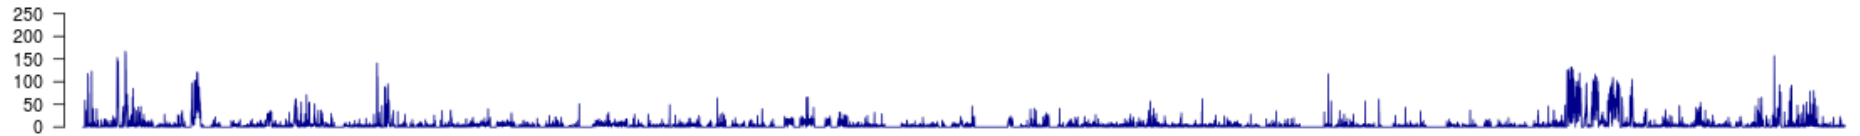

H15

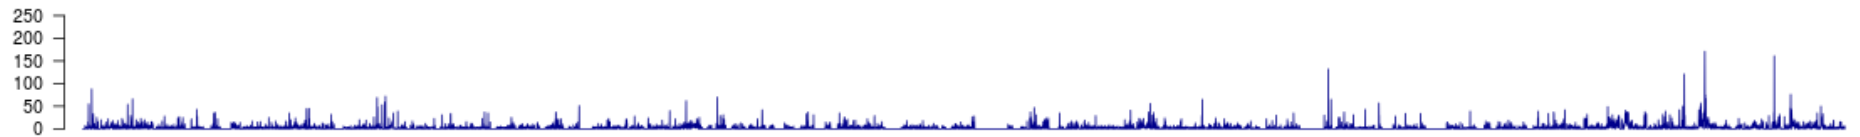

A0416

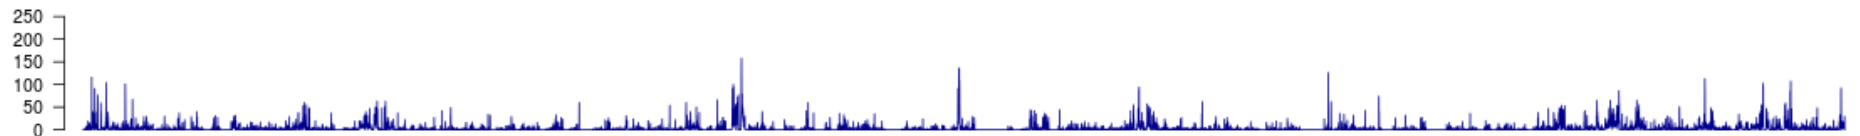

IVIA-371

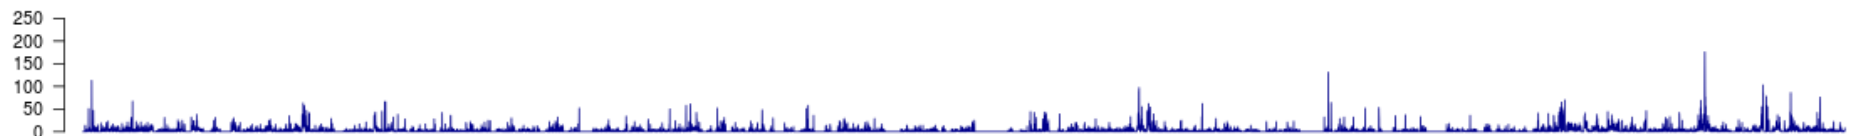

ASI-S-1

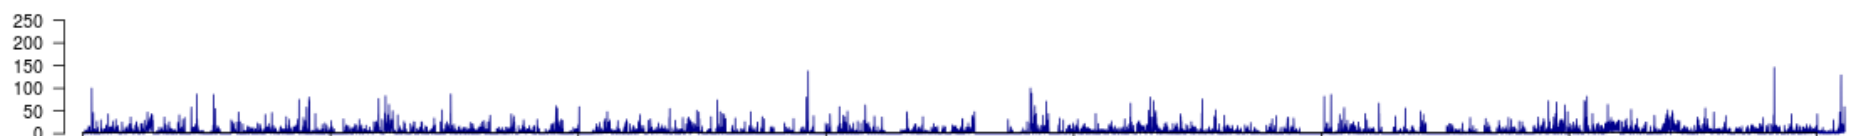

0 20 40 60 80 100 120 140

# Chromosome 8 heterozygous variants

MM577

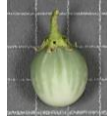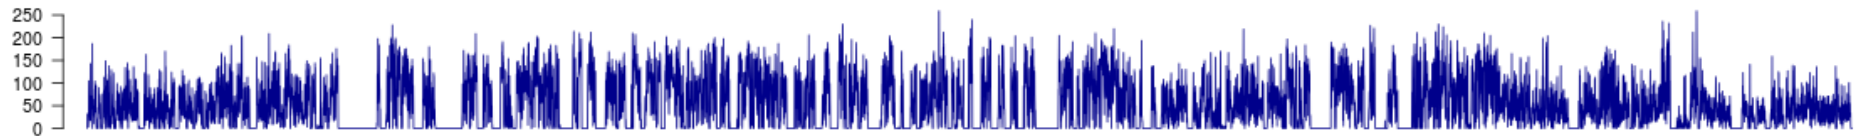

MM1597

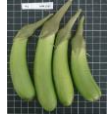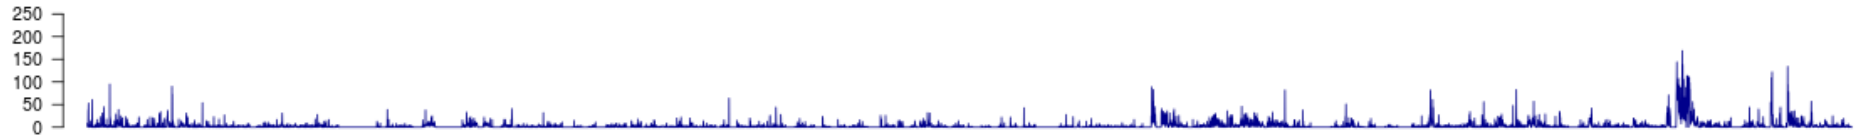

DH ECAVI

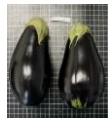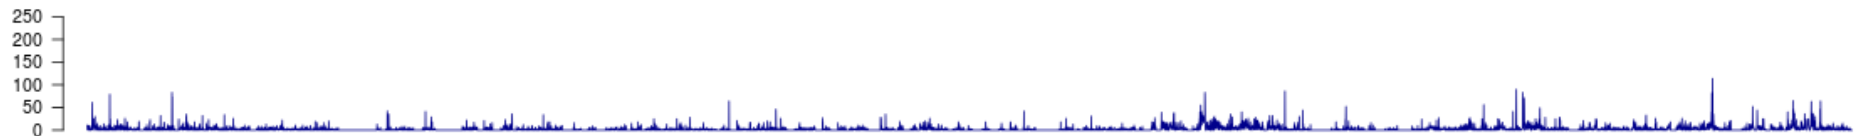

AN-S-26

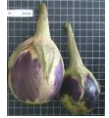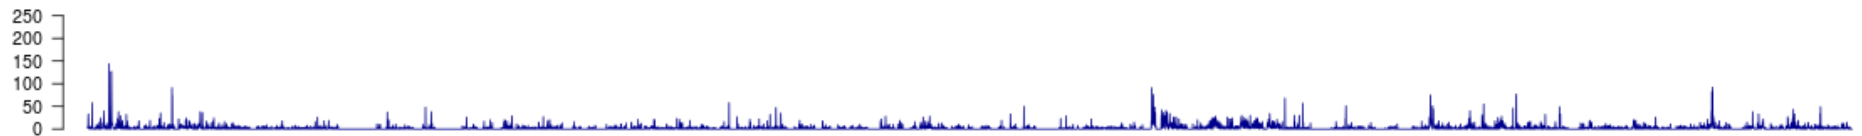

H15

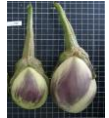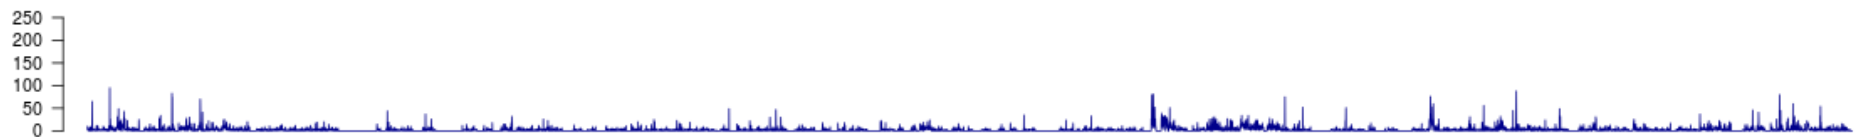

A0416

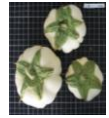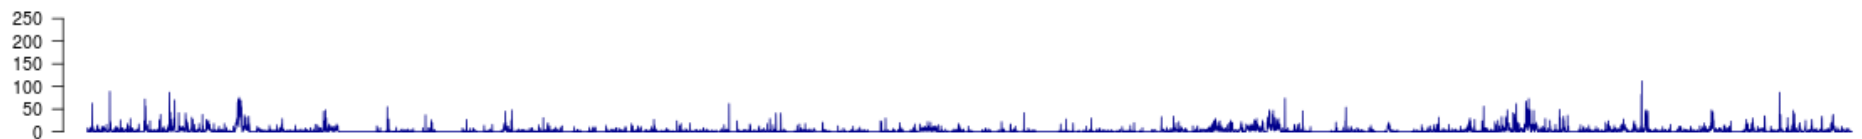

IVIA-371

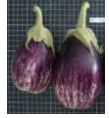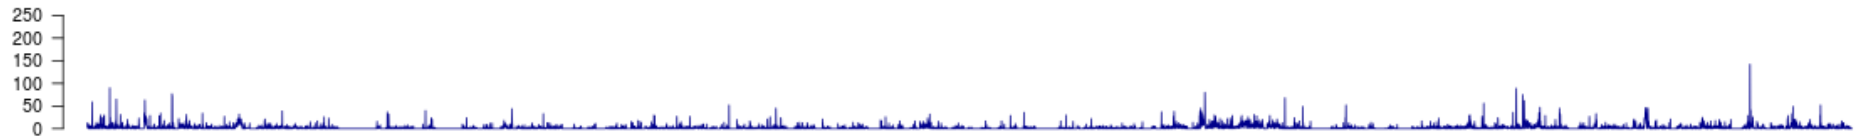

ASI-S-1

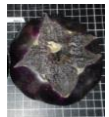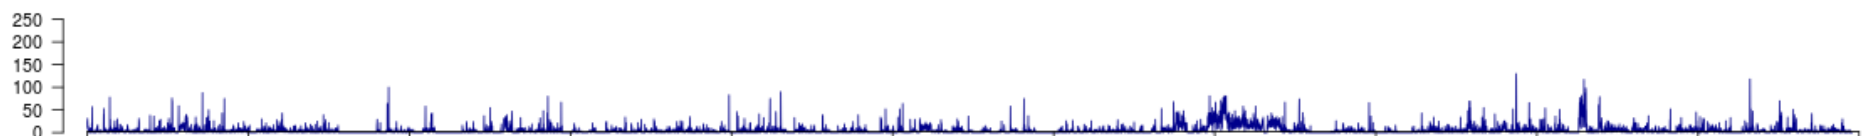

0 10 20 30 40 50 60 70 80 90 100 110

# Chromosome 9 heterozygous variants

MM577

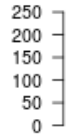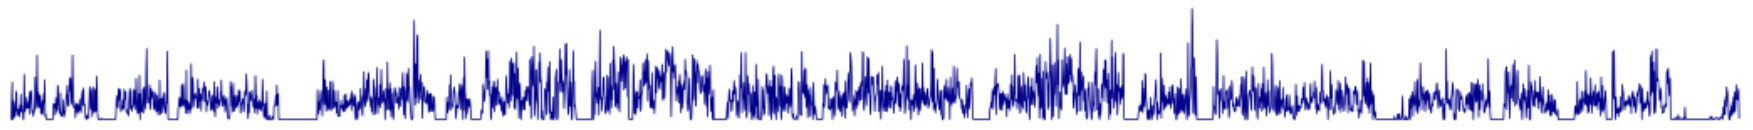

MM1597

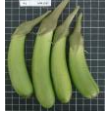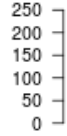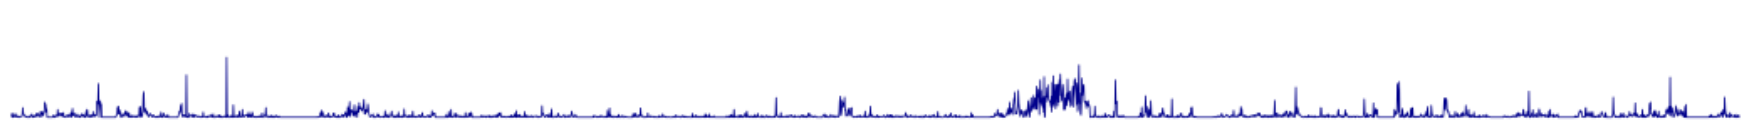

DH ECAVI

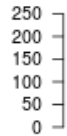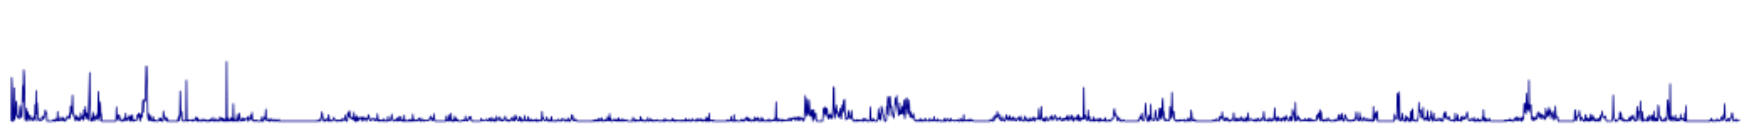

AN-S-26

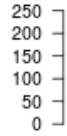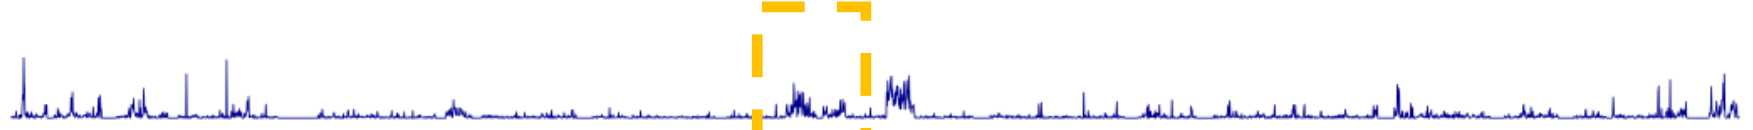

H15

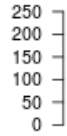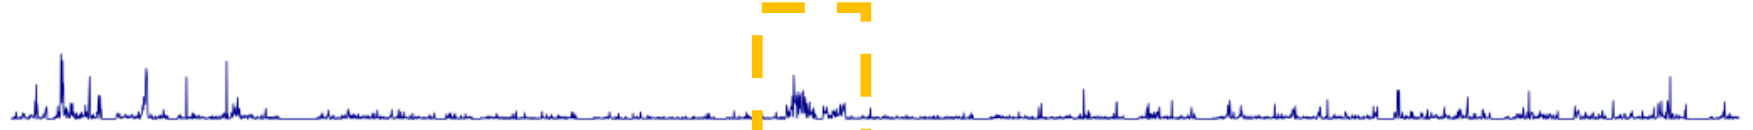

A0416

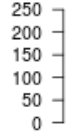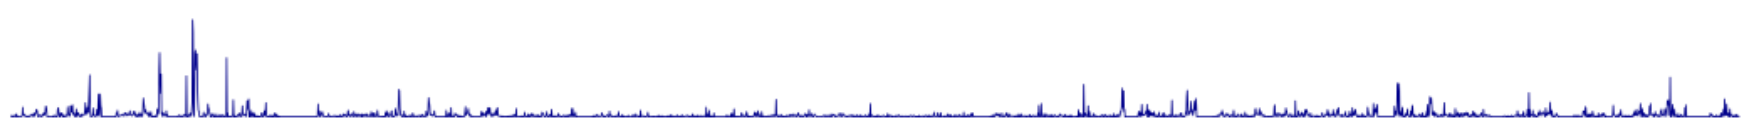

IVIA-371

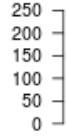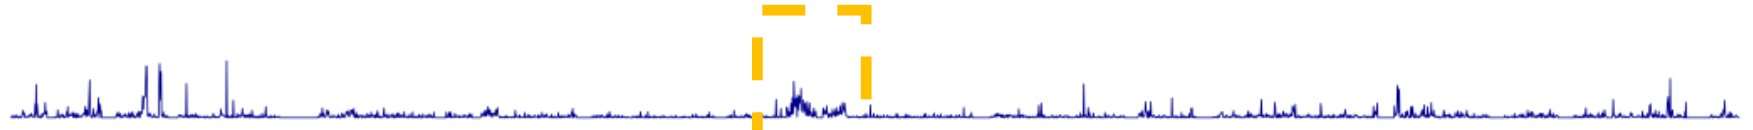

ASI-S-1

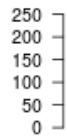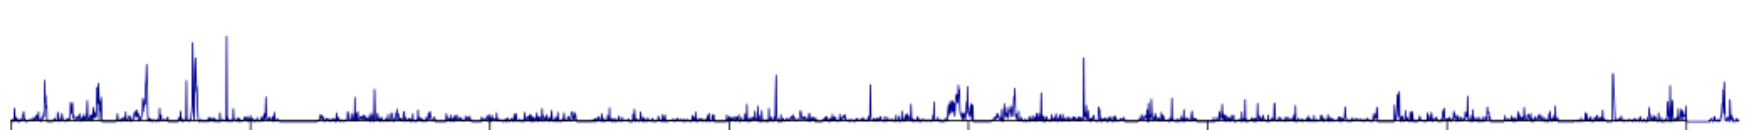

0 5 10 15 20 25 30 35

# Chromosome 10 heterozygous variants

**MM577**

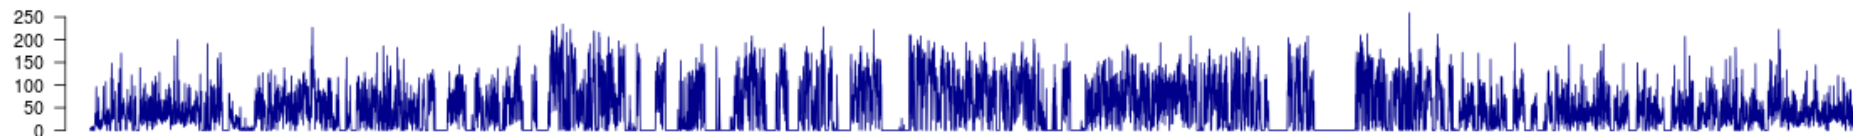

**MM1597**

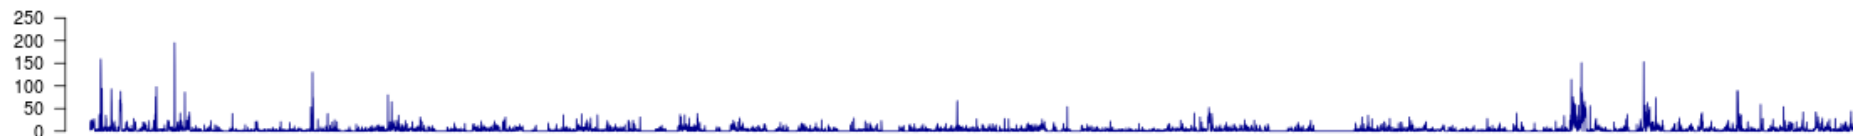

**DH ECAVI**

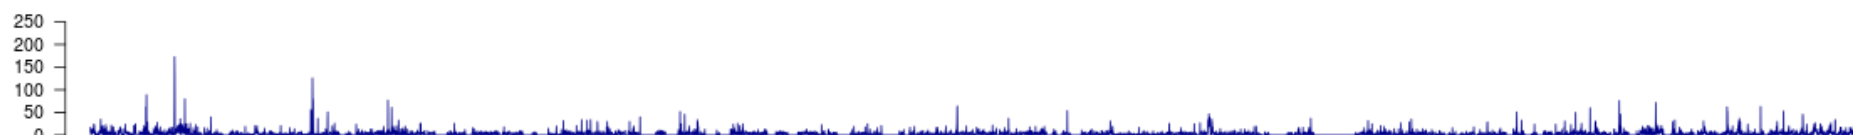

**AN-S-26**

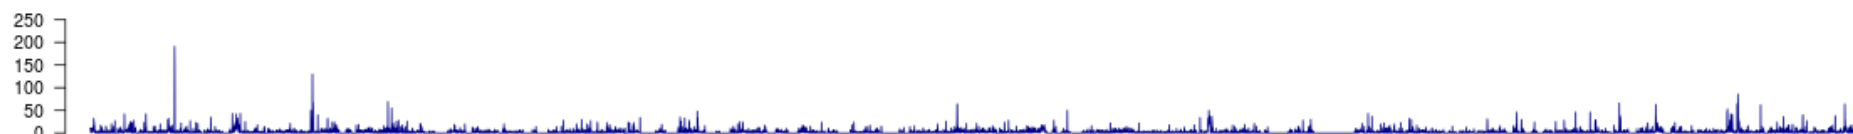

**H15**

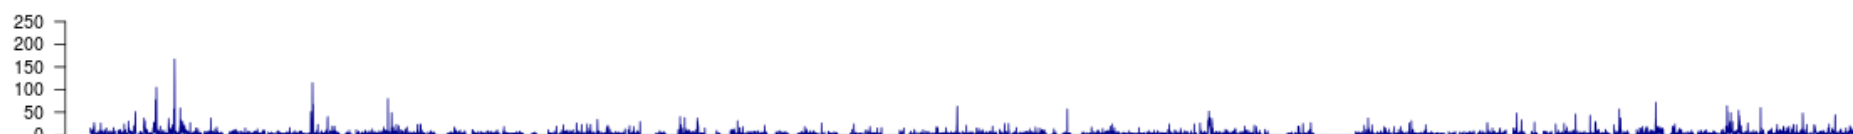

**A0416**

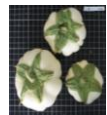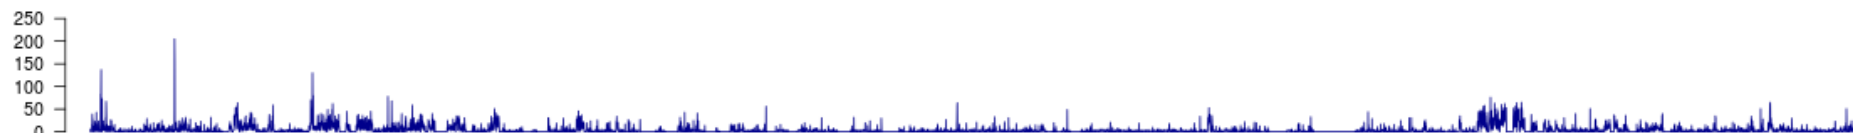

**IVIA-371**

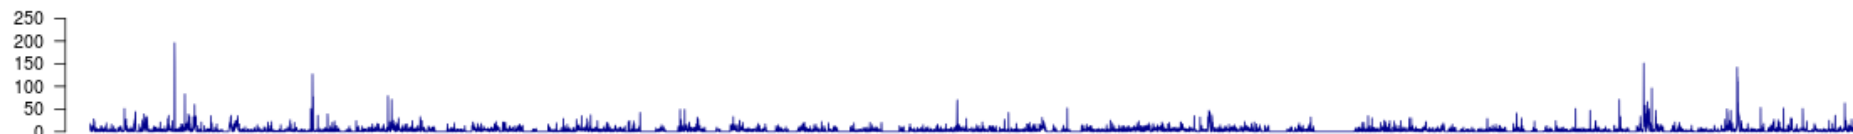

**ASI-S-1**

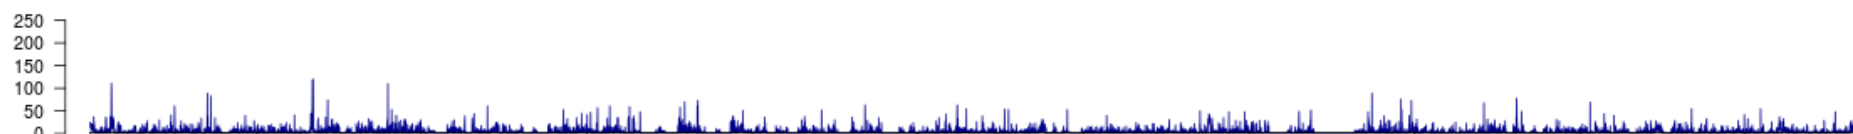

0

10

20

30

40

50

60

70

80

90

100

110

# Chromosome 11 heterozygous variants

MM577

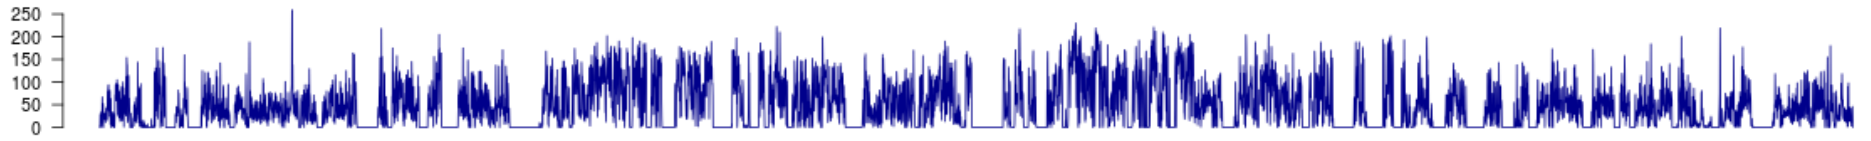

MM1597

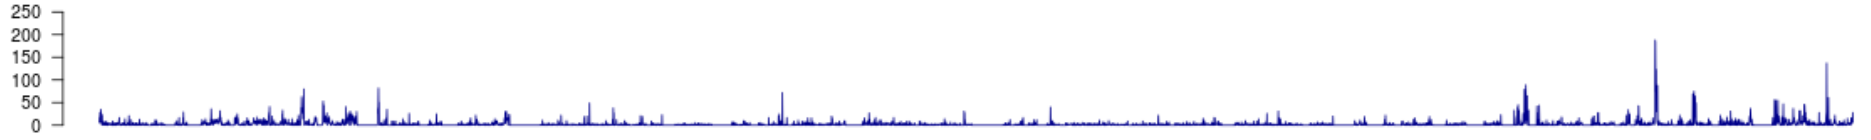

DH ECAVI

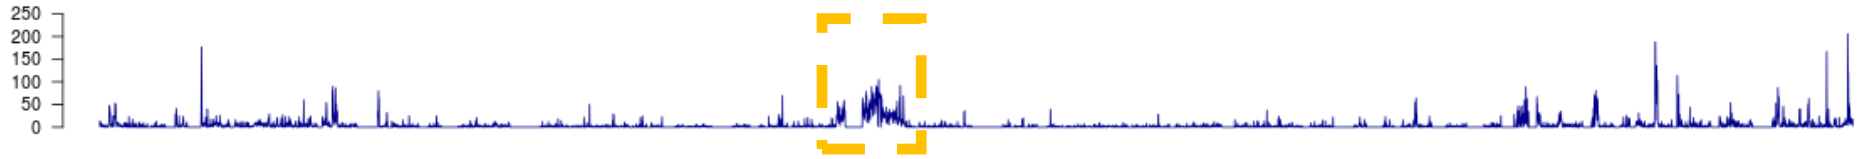

AN-S-26

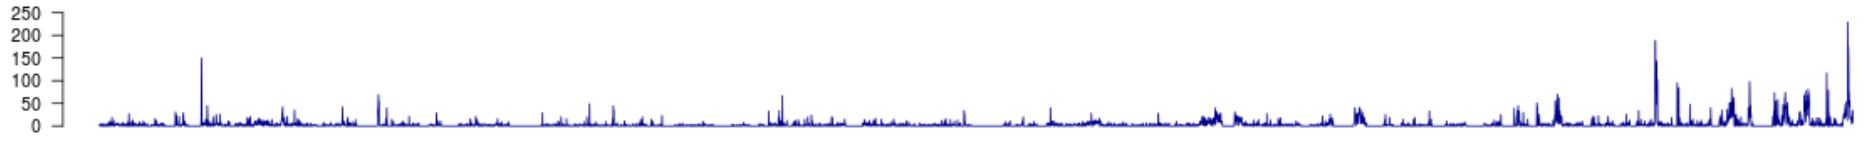

H15

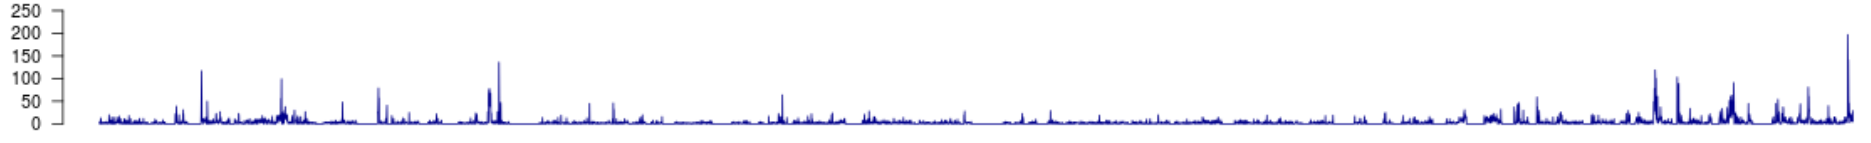

A0416

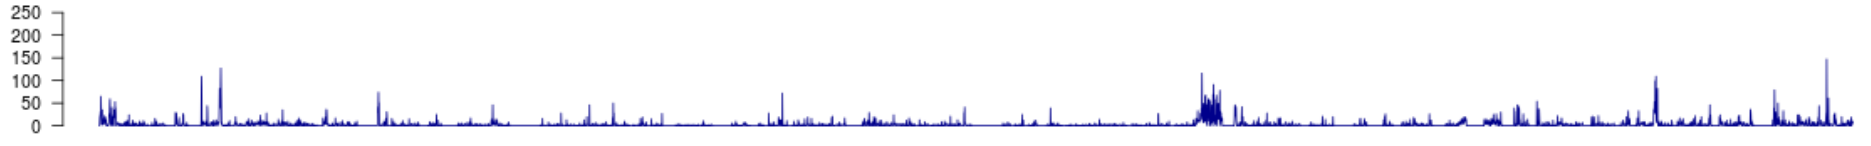

IVIA-371

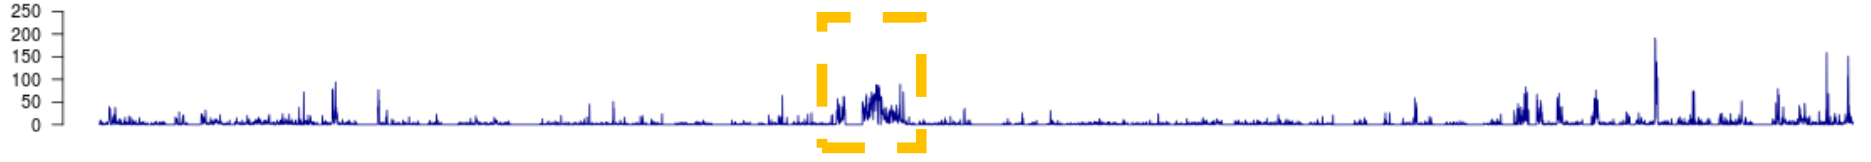

ASI-S-1

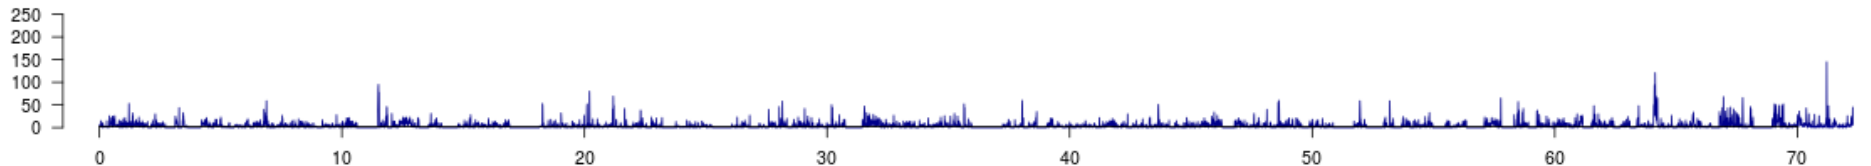



# Chromosome 12 heterozygous variants

MM577

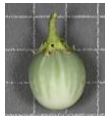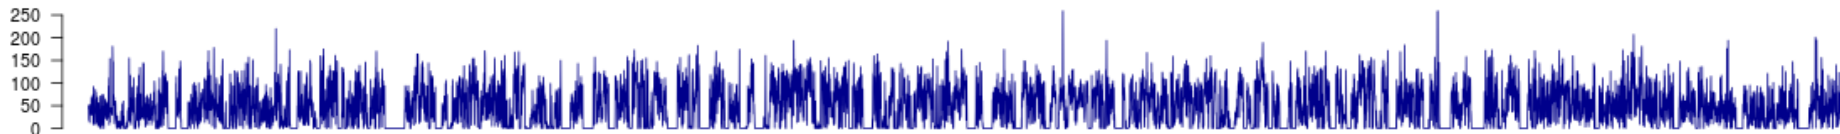

MM1597

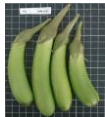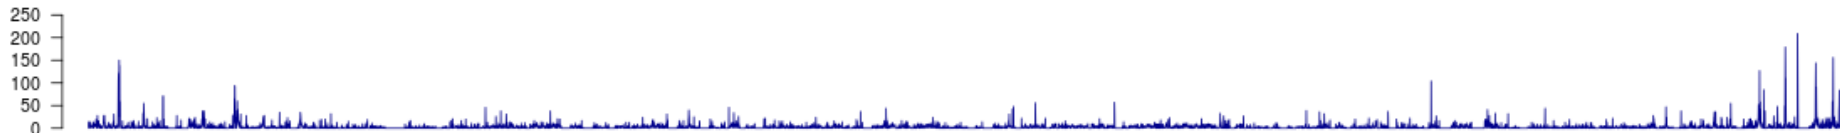

DH ECAVI

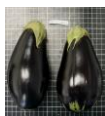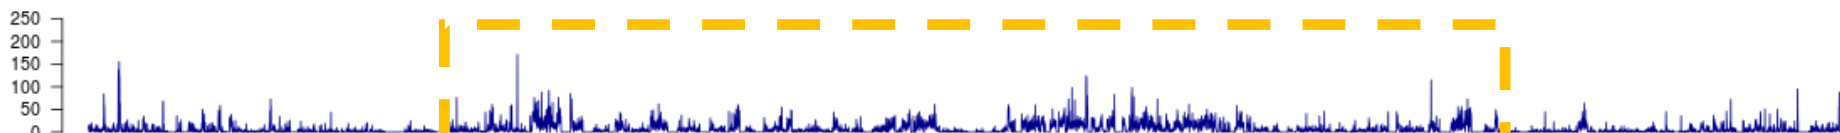

AN-S-26

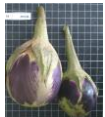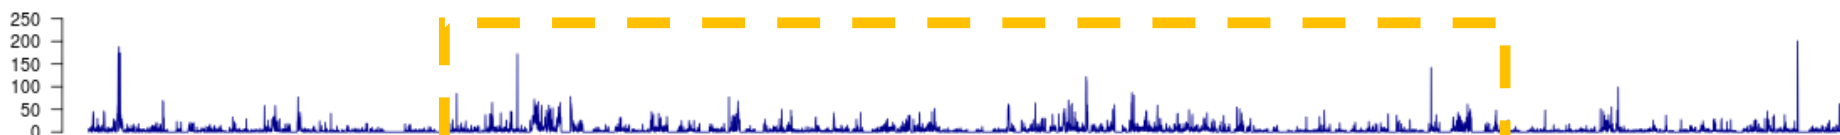

H15

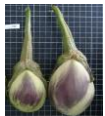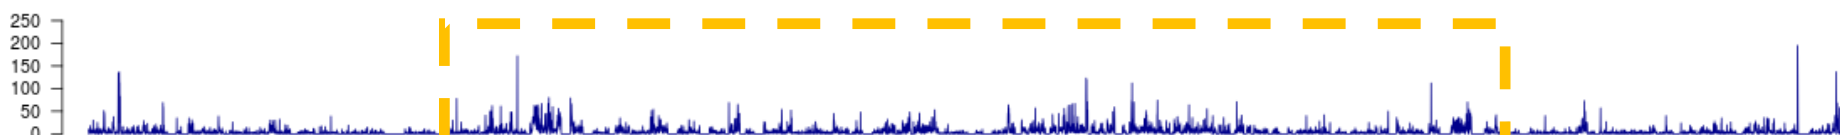

A0416

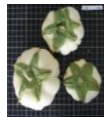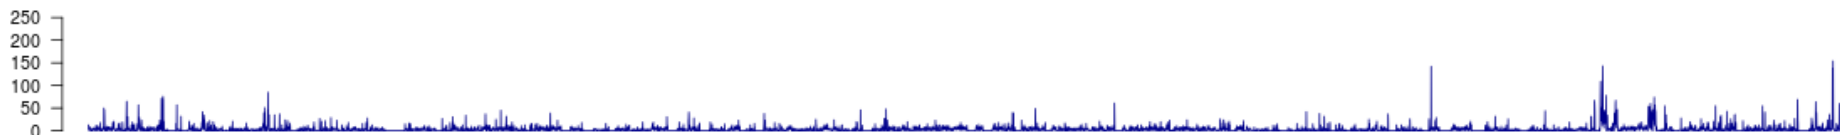

IVIA-371

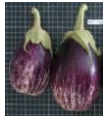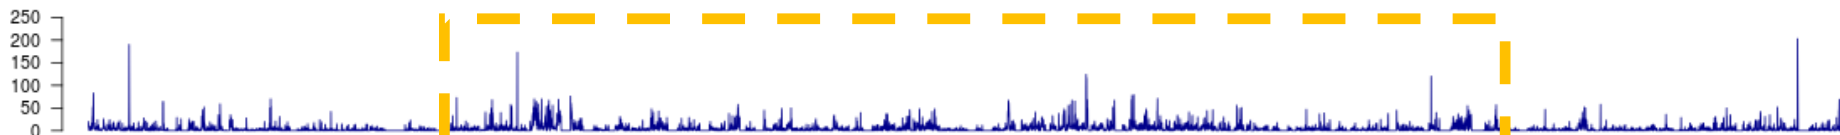

ASI-S-1

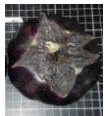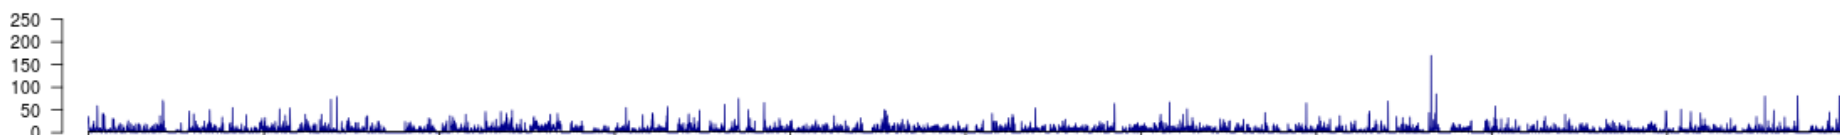

0 10 20 30 40 50 60 70 80 90 100
