# Supplementary material for: Whole-Genome Resequencing of Seven Eggplant (Solanum melongena) and One Wild Relative (S. incanum) Accessions Provides New Insights and Breeding Tools for Eggplant Enhancement
Source: Front Plant Sci. 2019 Oct 8;10:1220. doi: 10.3389/fpls.2019.01220 (PMC6791922; doi:10.3389/fpls.2019.01220)
Supplement: Supplementary file 1 [file DataSheet_1.xlsx]

## Sheet: Supplementary data S1
Supplementary data S1. Statistics of mapping coverage for the accessions and along the chromosomes using the S. melongena accession '67/3' as a reference genome (Barchi et al., 2019a). The percentages were calculated removing from the whole length of reference genome the assembled unknown nucleotides (N's).
	Chr.	Eggplant reference genome '67/3' size	Eggplant reference genome '67/3' size without N's	MM1597	% mapping coverage of MM577 onto the reference genome '67/3'	DH_ECAVI	% mapping coverage of DH_ECAVI onto the reference genome '67/3'	AN-S-26	% mapping coverage of AN-S-26 onto the reference genome '67/3'	H15	% mapping coverage of H15 onto the reference genome '67/3'	A0416	% mapping coverage of A0416 onto the reference genome '67/3'	IVIA-371	% mapping coverage of IVIA-371 onto the reference genome '67/3'	ASI-S-1	% mapping coverage of ASI-S-1 onto the reference genome '67/3'	MM577	% mapping coverage of MM577 onto the reference genome '67/3'
	1	136534347	102614198	103248609	100.6	103218612	100.6	103120506	100.5	103035647	100.4	102458813	99.8	103197501	100.6	103517928	100.9	98249527	95.7
	2	83340400	58001731	58357371	100.6	58469562	100.8	58652524	101.1	58542307	100.9	58644795	101.1	58395380	100.7	58654829	101.1	55029656	94.9
	3	97014425	69033053	69543096	100.7	69497762	100.7	69393233	100.5	69377457	100.5	69437676	100.6	69522659	100.7	69509637	100.7	66834301	96.8
	4	105671276	73114965	73755710	100.9	73656373	100.7	73579963	100.6	73730831	100.8	73981756	101.2	73779086	100.9	73904831	101.1	69654203	95.3
	5	43853053	33457432	33595729	100.4	33542813	100.3	33515422	100.2	33598393	100.4	33569095	100.3	33505804	100.1	33700419	100.7	32127012	96
	6	108971373	78167775	78231321	100.1	78821334	100.8	78291303	100.2	78131386	100	78301976	100.2	78779322	100.8	78525369	100.5	74556753	95.4
	7	142259855	98233470	98649926	100.4	98996853	100.8	99265079	101.1	98971134	100.8	99010426	100.8	99010426	100.8	99250128	101	92863967	94.5
	8	109575448	75724261	76239873	100.7	76313064	100.8	76237061	100.7	76192269	100.6	76326688	100.8	76326688	100.8	76451558	101	71688755	94.7
	9	36100499	27925522	27965579	100.1	28003480	100.3	27871576	99.8	27928265	100	27982117	100.2	27982117	100.2	28045233	100.4	26741007	95.8
	10	106644908	75987091	75986601	100	76666052	100.9	76341616	100.5	76512760	100.7	76139099	100.2	76139099	100.2	76680756	100.9	72098706	94.9
	11	72290491	48863562	49158540	100.6	49161767	100.6	49228032	100.7	49080247	100.4	48796336	99.9	48921451	100.1	49269757	100.8	46677652	95.5
	12	100421161	72849587	73350352	100.7	72482470	99.5	72357466	99.3	72125735	99	72225400	99.1	72225400	99.1	73613953	101	69629272	95.6
	Mean				100.5		100.6		100.4		100.4		100.4		100.4		100.8		95.4
