# Supplementary material for: Whole-Genome Resequencing of Seven Eggplant (Solanum melongena) and One Wild Relative (S. incanum) Accessions Provides New Insights and Breeding Tools for Eggplant Enhancement
Source: Front Plant Sci. 2019 Oct 8;10:1220. doi: 10.3389/fpls.2019.01220 (PMC6791922; doi:10.3389/fpls.2019.01220)
Supplement: Supplementary file 6 [file DataSheet_6.xlsx]

## Sheet: Supplementary data S6-1
Supplementary data S6-1: Biological Processes (BP) GO Term Enrichment analysis on the genes that present a high impact variant from the SNPeff analysis. P-values are sorted by "weight" algorithm column. In gray significant terms.
S. incanum MM577	GO.ID	BP Term	Annotated	Significant	Expected	Rank in classic	classic	weight	elim
1	GO:0000723	telomere maintenance	58	25	7.63	1	1.7e-08	1.7e-08	1.7e-08
2	GO:0015977	carbon fixation	17	8	2.24	5	0.00071	0.00071	0.00071
3	GO:0009772	photosynthetic electron transport in pho...	36	12	4.73	7	0.00152	0.00152	0.00152
4	GO:0006383	transcription by RNA polymerase III	8	5	1.05	8	0.00155	0.00155	0.13124
5	GO:0006281	DNA repair	195	41	25.64	6	0.00136	0.00202	0.00136
6	GO:0009298	GDP-mannose biosynthetic process	4	3	0.53	16	0.00818	0.00818	0.00818
7	GO:0055114	oxidation-reduction process	1389	214	182.63	14	0.00462	0.01727	0.01737
8	GO:0043549	regulation of kinase activity	17	4	2.24	150	0.17594	0.01727	0.17594
9	GO:0006379	mRNA cleavage	2	2	0.26	21	0.01728	0.01728	0.01728
10	GO:0000154	rRNA modification	5	3	0.66	25	0.01845	0.01845	0.01845
11	GO:0034470	ncRNA processing	80	20	10.52	13	0.00294	0.02831	0.00294
12	GO:0001510	RNA methylation	15	5	1.97	36	0.03763	0.03763	0.03763
13	GO:0015991	ATP hydrolysis coupled proton transport	65	14	8.55	37	0.04049	0.04049	0.04049
14	GO:0006511	ubiquitin-dependent protein catabolic pr...	84	17	11.04	42	0.04425	0.04425	0.04425
15	GO:0006433	prolyl-tRNA aminoacylation	3	2	0.39	46	0.04729	0.04729	0.04729
16	GO:0031123	RNA 3'-end processing	18	6	2.37	31	0.02328	0.04888	0.02328
17	GO:0009308	amine metabolic process	41	9	5.39	67	0.08124	0.04888	0.08124
18	GO:0009084	glutamine family amino acid biosynthetic...	16	5	2.1	49	0.04898	0.04898	0.04898
19	GO:0006536	glutamate metabolic process	7	3	0.92	54	0.05271	0.05271	0.05271
20	GO:0015936	coenzyme A metabolic process	8	3	1.05	63	0.07628	0.07628	0.07628
S. melongena MM1597	GO.ID	BP Term	Annotated	Significant	Expected	Rank in classic	classic	weight	elim
1	GO:0015991	ATP hydrolysis coupled proton transport	65	11	2.57	3	4.1e-05	4.1e-05	4.1e-05
2	GO:0009772	photosynthetic electron transport in pho...	36	8	1.42	8	6.3e-05	6.3e-05	6.3e-05
3	GO:0015986	ATP synthesis coupled proton transport	62	9	2.45	13	0.00067	0.00067	0.00067
4	GO:0015979	photosynthesis	183	23	7.22	1	8e-07	0.00145	0.00057
5	GO:0055114	oxidation-reduction process	1389	78	54.82	12	0.00062	0.01337	0.00627
6	GO:0015977	carbon fixation	17	3	0.67	40	0.02748	0.02748	0.02748
7	GO:0006075	(1->3)-beta-D-glucan biosynthetic proces...	7	2	0.28	44	0.0286	0.0286	0.0286
8	GO:0006044	N-acetylglucosamine metabolic process	1	1	0.04	58	0.03946	0.03946	0.03946
9	GO:0006269	DNA replication, synthesis of RNA primer	1	1	0.04	59	0.03946	0.03946	0.03946
10	GO:0006336	DNA replication-independent nucleosome a...	1	1	0.04	60	0.03946	0.03946	0.03946
11	GO:0006491	N-glycan processing	1	1	0.04	61	0.03946	0.03946	0.03946
12	GO:0010167	response to nitrate	1	1	0.04	62	0.03946	0.03946	0.03946
13	GO:0015706	nitrate transport	1	1	0.04	63	0.03946	0.03946	0.03946
14	GO:0005985	sucrose metabolic process	11	2	0.43	68	0.06752	0.06752	0.06752
15	GO:0006282	regulation of DNA repair	2	1	0.08	70	0.07738	0.07738	0.07738
16	GO:0006285	base-excision repair, AP site formation	2	1	0.08	71	0.07738	0.07738	0.07738
17	GO:0042549	photosystem II stabilization	2	1	0.08	72	0.07738	0.07738	0.07738
18	GO:0006396	RNA processing	234	14	9.23	77	0.07959	0.07959	0.07959
19	GO:0015693	magnesium ion transport	13	2	0.51	80	0.09096	0.09096	0.09096
20	GO:0006384	transcription initiation from RNA polyme...	3	1	0.12	81	0.11379	0.11379	0.11379
S. melongena DH_ECAVI	GO.ID	BP Term	Annotated	Significant	Expected	Rank in classic	classic	weight	elim
1	GO:0009772	photosynthetic electron transport in pho...	36	9	1.4	2	7e-06	7e-06	7e-06
2	GO:0015986	ATP synthesis coupled proton transport	62	10	2.42	8	0.00013	0.00013	0.00013
3	GO:0015979	photosynthesis	183	26	7.13	1	9.1e-09	0.00021	4.3e-05
4	GO:0015991	ATP hydrolysis coupled proton transport	65	9	2.53	21	0.00087	0.00087	0.00087
5	GO:0000724	double-strand break repair via homologou...	8	3	0.31	34	0.00284	0.00284	0.00284
6	GO:0031929	TOR signaling	4	2	0.16	48	0.00862	0.00862	0.00862
7	GO:0009060	aerobic respiration	17	3	0.66	62	0.02657	0.02657	0.02657
8	GO:0015977	carbon fixation	17	3	0.66	63	0.02657	0.02657	0.02657
9	GO:1901264	carbohydrate derivative transport	8	2	0.31	66	0.03627	0.03627	0.03627
10	GO:0006269	DNA replication, synthesis of RNA primer	1	1	0.04	67	0.03896	0.03896	0.03896
11	GO:0006336	DNA replication-independent nucleosome a...	1	1	0.04	68	0.03896	0.03896	0.03896
12	GO:0042276	error-prone translesion synthesis	1	1	0.04	69	0.03896	0.03896	0.03896
13	GO:0016573	histone acetylation	10	2	0.39	75	0.05538	0.05538	0.05538
14	GO:0006468	protein phosphorylation	1023	49	39.85	82	0.07292	0.07292	0.07292
15	GO:0006285	base-excision repair, AP site formation	2	1	0.08	83	0.0764	0.0764	0.0764
16	GO:0042372	phylloquinone biosynthetic process	2	1	0.08	84	0.0764	0.0764	0.0764
17	GO:0042549	photosystem II stabilization	2	1	0.08	85	0.0764	0.0764	0.0764
18	GO:0044070	regulation of anion transport	2	1	0.08	86	0.0764	0.0764	0.0764
19	GO:0016070	RNA metabolic process	1358	50	52.9	451	0.692	0.07943	0.692
20	GO:0006367	transcription initiation from RNA polyme...	13	2	0.51	95	0.08896	0.08896	0.08896
S. melongena AN-S-26	GO.ID	BP Term	Annotated	Significant	Expected	Rank in classic	classic	weight	elim
1	GO:0009772	photosynthetic electron transport in pho...	36	11	1.4	2	6.8e-08	6.8e-08	6.8e-08
2	GO:0015986	ATP synthesis coupled proton transport	62	11	2.42	6	2.3e-05	2.3e-05	2.3e-05
3	GO:0015991	ATP hydrolysis coupled proton transport	65	10	2.53	11	0.00019	0.00019	0.00019
4	GO:0015979	photosynthesis	183	29	7.13	1	8.6e-11	0.00028	1.1e-05
5	GO:0000184	nuclear-transcribed mRNA catabolic proce...	4	2	0.16	43	0.00862	0.00862	0.00862
6	GO:0016070	RNA metabolic process	1358	59	52.9	199	0.19761	0.01865	0.26837
7	GO:0034654	nucleobase-containing compound biosynthe...	1203	56	46.87	94	0.08713	0.01986	0.42403
8	GO:0015977	carbon fixation	17	3	0.66	57	0.02657	0.02657	0.02657
9	GO:0006075	(1->3)-beta-D-glucan biosynthetic proces...	7	2	0.27	58	0.02791	0.02791	0.02791
10	GO:0006336	DNA replication-independent nucleosome a...	1	1	0.04	62	0.03896	0.03896	0.03896
11	GO:0048280	vesicle fusion with Golgi apparatus	1	1	0.04	63	0.03896	0.03896	0.03896
12	GO:0045333	cellular respiration	49	5	1.91	68	0.041	0.041	0.041
13	GO:0050821	protein stabilization	9	2	0.35	70	0.04546	0.04546	0.04546
14	GO:0009767	photosynthetic electron transport chain	72	15	2.8	3	8.3e-08	0.05045	0.04634
15	GO:0042254	ribosome biogenesis	58	5	2.26	82	0.07456	0.07456	0.07456
16	GO:0007064	mitotic sister chromatid cohesion	2	1	0.08	84	0.0764	0.0764	0.0764
17	GO:0016973	poly(A)+ mRNA export from nucleus	2	1	0.08	85	0.0764	0.0764	0.0764
18	GO:0042549	photosystem II stabilization	2	1	0.08	86	0.0764	0.0764	0.0764
19	GO:0044070	regulation of anion transport	2	1	0.08	87	0.0764	0.0764	0.0764
20	GO:0005986	sucrose biosynthetic process	3	1	0.12	99	0.11239	0.11239	0.11239
S. melongena H15	GO.ID	BP Term	Annotated	Significant	Expected	Rank in classic	classic	weight	elim
1	GO:0015979	photosynthesis	183	25	8.04	1	4e-07	1.1e-06	0.0046
2	GO:0015991	ATP hydrolysis coupled proton transport	65	12	2.86	4	2.1e-05	2.1e-05	2.1e-05
3	GO:0015986	ATP synthesis coupled proton transport	62	8	2.72	21	0.0055	0.0055	0.0055
4	GO:0009584	detection of visible light	4	2	0.18	28	0.0109	0.0109	0.0109
5	GO:0046373	L-arabinose metabolic process	4	2	0.18	29	0.0109	0.0109	0.0109
6	GO:0034654	nucleobase-containing compound biosynthe...	1203	64	52.85	84	0.0576	0.0259	0.1764
7	GO:0051274	beta-glucan biosynthetic process	39	5	1.71	48	0.0269	0.0269	0.0269
8	GO:0006366	transcription by RNA polymerase II	42	5	1.84	60	0.0357	0.0357	0.0357
9	GO:0015977	carbon fixation	17	3	0.75	61	0.0362	0.0362	0.0362
10	GO:0000027	ribosomal large subunit assembly	1	1	0.04	69	0.0439	0.0439	0.0439
11	GO:0006336	DNA replication-independent nucleosome a...	1	1	0.04	70	0.0439	0.0439	0.0439
12	GO:0010338	leaf formation	1	1	0.04	71	0.0439	0.0439	0.0439
13	GO:0035194	posttranscriptional gene silencing by RN...	1	1	0.04	72	0.0439	0.0439	0.0439
14	GO:0009141	nucleoside triphosphate metabolic proces...	149	14	6.55	24	0.0058	0.0534	0.1759
15	GO:0009123	nucleoside monophosphate metabolic proce...	159	13	6.98	46	0.0227	0.0539	0.4129
16	GO:0045333	cellular respiration	49	5	2.15	88	0.0627	0.0627	0.0627
17	GO:0048856	anatomical structure development	90	8	3.95	68	0.0437	0.081	0.0437
18	GO:0043269	regulation of ion transport	4	2	0.18	30	0.0109	0.0858	0.0109
19	GO:0006285	base-excision repair, AP site formation	2	1	0.09	94	0.0859	0.0859	0.0859
20	GO:0007064	mitotic sister chromatid cohesion	2	1	0.09	95	0.0859	0.0859	0.0859
S. melongena A0416	GO.ID	BP Term	Annotated	Significant	Expected	Rank in classic	classic	weight	elim
1	GO:0009767	photosynthetic electron transport chain	72	14	2.81	2	5.7e-07	5.7e-07	0.0114
2	GO:0015991	ATP hydrolysis coupled proton transport	65	12	2.54	3	6.6e-06	6.6e-06	6.6e-06
3	GO:0015979	photosynthesis	183	26	7.15	1	9.6e-09	0.00099	4.5e-05
4	GO:0015986	ATP synthesis coupled proton transport	62	8	2.42	17	0.0027	0.00269	0.0027
5	GO:0015977	carbon fixation	17	4	0.66	19	0.0036	0.00364	0.0036
6	GO:0048544	recognition of pollen	54	7	2.11	20	0.0048	0.00477	0.0048
7	GO:0032774	RNA biosynthetic process	1020	43	39.84	194	0.319	0.00833	0.319
8	GO:0050821	protein stabilization	9	2	0.35	35	0.0457	0.04567	0.0457
9	GO:0006631	fatty acid metabolic process	93	8	3.63	31	0.0286	0.05275	0.0286
10	GO:0005985	sucrose metabolic process	11	2	0.43	38	0.0663	0.06629	0.0663
11	GO:0000723	telomere maintenance	58	5	2.27	39	0.0752	0.07522	0.0752
12	GO:0006285	base-excision repair, AP site formation	2	1	0.08	42	0.0766	0.0766	0.0766
13	GO:0006788	heme oxidation	2	1	0.08	43	0.0766	0.0766	0.0766
14	GO:0010155	regulation of proton transport	2	1	0.08	44	0.0766	0.0766	0.0766
15	GO:0006541	glutamine metabolic process	12	2	0.47	48	0.0776	0.07755	0.0776
16	GO:0006366	transcription by RNA polymerase II	42	4	1.64	50	0.0802	0.08017	0.0802
17	GO:0016998	cell wall macromolecule catabolic proces...	13	2	0.51	57	0.0894	0.08936	0.0894
18	GO:0000245	spliceosomal complex assembly	3	1	0.12	66	0.1127	0.11267	0.1127
19	GO:0006434	seryl-tRNA aminoacylation	3	1	0.12	67	0.1127	0.11267	0.1127
20	GO:0009813	flavonoid biosynthetic process	3	1	0.12	68	0.1127	0.11267	0.1127
S. melongena IVIA-371	GO.ID	BP Term	Annotated	Significant	Expected	Rank in classic	classic	weight	elim
1	GO:0009772	photosynthetic electron transport in pho...	36	10	1.59	2	2.2e-06	2.2e-06	2.2e-06
2	GO:0015991	ATP hydrolysis coupled proton transport	65	10	2.86	7	0.0005	0.0005	0.0005
3	GO:0015977	carbon fixation	17	4	0.75	15	0.0056	0.0056	0.0056
4	GO:0045292	mRNA cis splicing, via spliceosome	3	2	0.13	16	0.0056	0.0056	0.0056
5	GO:0015979	photosynthesis	183	25	8.06	1	4.2e-07	0.0061	0.0017
6	GO:0009065	glutamine family amino acid catabolic pr...	4	2	0.18	19	0.0109	0.0109	0.0109
7	GO:0007018	microtubule-based movement	62	7	2.73	21	0.0186	0.0186	0.0186
8	GO:0006269	DNA replication, synthesis of RNA primer	1	1	0.04	27	0.044	0.044	0.044
9	GO:0006336	DNA replication-independent nucleosome a...	1	1	0.04	28	0.044	0.044	0.044
10	GO:0034551	mitochondrial respiratory chain complex ...	1	1	0.04	29	0.044	0.044	0.044
11	GO:0046938	phytochelatin biosynthetic process	1	1	0.04	30	0.044	0.044	0.044
12	GO:0000724	double-strand break repair via homologou...	8	2	0.35	36	0.0454	0.0454	0.0454
13	GO:0015986	ATP synthesis coupled proton transport	62	6	2.73	40	0.0544	0.0544	0.0544
14	GO:0006563	L-serine metabolic process	20	3	0.88	45	0.0554	0.0554	0.0554
15	GO:0055085	transmembrane transport	650	43	28.62	14	0.0046	0.0614	0.0705
16	GO:0006544	glycine metabolic process	10	2	0.44	52	0.0689	0.0689	0.0689
17	GO:0006511	ubiquitin-dependent protein catabolic pr...	84	7	3.7	54	0.0762	0.0762	0.0762
18	GO:0006596	polyamine biosynthetic process	11	2	0.48	59	0.0818	0.0818	0.0818
19	GO:0006285	base-excision repair, AP site formation	2	1	0.09	63	0.0861	0.0861	0.0861
20	GO:0010038	response to metal ion	2	1	0.09	64	0.0861	0.0861	0.0861
S. melongena ASI-S-1	GO.ID	BP Term	Annotated	Significant	Expected	Rank in classic	classic	weight	elim
1	GO:0009767	photosynthetic electron transport chain	72	17	2.38	2	1.2e-10	1.2e-10	0.0009
2	GO:0015991	ATP hydrolysis coupled proton transport	65	16	2.15	3	2.1e-10	2.1e-10	2.1e-10
3	GO:0015986	ATP synthesis coupled proton transport	62	12	2.05	29	6.8e-07	6.8e-07	6.8e-07
4	GO:0009144	purine nucleoside triphosphate metabolic...	145	20	4.8	16	5.6e-08	0.00034	1
5	GO:0009199	ribonucleoside triphosphate metabolic pr...	145	20	4.8	17	5.6e-08	0.00034	1
6	GO:0009126	purine nucleoside monophosphate metaboli...	150	20	4.96	21	1e-07	0.00068	1
7	GO:0015979	photosynthesis	183	28	6.05	1	9e-12	0.00074	0.00074
8	GO:0015977	carbon fixation	17	3	0.56	66	0.017	0.01727	0.01727
9	GO:0006884	cell volume homeostasis	1	1	0.03	69	0.033	0.03307	0.03307
10	GO:0010508	positive regulation of autophagy	1	1	0.03	70	0.033	0.03307	0.03307
11	GO:0035194	posttranscriptional gene silencing by RN...	1	1	0.03	71	0.033	0.03307	0.03307
12	GO:0050821	protein stabilization	9	2	0.3	77	0.034	0.03366	0.03366
13	GO:0006468	protein phosphorylation	1023	44	33.83	84	0.041	0.04076	0.04076
14	GO:0006821	chloride transport	11	2	0.36	87	0.049	0.04924	0.04924
15	GO:0007064	mitotic sister chromatid cohesion	2	1	0.07	93	0.065	0.06506	0.06506
16	GO:0010038	response to metal ion	2	1	0.07	94	0.065	0.06506	0.06506
17	GO:0010224	response to UV-B	2	1	0.07	95	0.065	0.06506	0.06506
18	GO:0042256	mature ribosome assembly	2	1	0.07	96	0.065	0.06506	0.06506
19	GO:0044070	regulation of anion transport	2	1	0.07	97	0.065	0.06506	0.06506
20	GO:0006412	translation	538	25	17.79	90	0.053	0.07699	0.05339

## Sheet: Supplementary data S6-2
Supplementary data S6-2: Celullar Component (CC) GO Term Enrichment analysis on the genes that present a high impact variant from the SNPeff analysis. P-values are sorted by "weight" algorithm column. In gray significant terms.
S. incanum MM577	GO.ID	CC Term	Annotated	Significant	Expected	Rank in classic	classic	weight	elim
1	GO:0009507	chloroplast	74	22	9.05	1	4.1e-05	4.1e-05	4.1e-05
2	GO:0033178	proton-transporting two-sector ATPase co...	47	15	5.75	5	0.0003	0.0003	0.0003
3	GO:0000126	transcription factor TFIIIB complex	3	3	0.37	6	0.0018	0.0018	0.0018
4	GO:0090575	RNA polymerase II transcription factor c...	20	7	2.45	13	0.0073	0.0073	0.0073
5	GO:0070772	PAS complex	2	2	0.24	14	0.0149	0.0149	0.0149
6	GO:0005666	RNA polymerase III complex	3	2	0.37	22	0.0412	0.0412	0.0412
7	GO:0005849	mRNA cleavage factor complex	8	3	0.98	27	0.0636	0.0636	0.0636
8	GO:0009522	photosystem I	51	10	6.24	29	0.086	0.086	0.086
9	GO:0019773	proteasome core complex, alpha-subunit c...	10	3	1.22	34	0.1134	0.1134	0.1134
10	GO:0000172	ribonuclease MRP complex	1	1	0.12	36	0.1223	0.1223	0.1223
11	GO:0001527	microfibril	1	1	0.12	37	0.1223	0.1223	0.1223
12	GO:0030677	ribonuclease P complex	1	1	0.12	38	0.1223	0.1223	0.1223
13	GO:0044599	AP-5 adaptor complex	1	1	0.12	39	0.1223	0.1223	0.1223
14	GO:0046658	anchored component of plasma membrane	1	1	0.12	40	0.1223	0.1223	0.1223
15	GO:0048476	Holliday junction resolvase complex	1	1	0.12	41	0.1223	0.1223	0.1223
16	GO:0009317	acetyl-CoA carboxylase complex	11	3	1.35	50	0.1424	0.1424	0.1424
17	GO:0009654	photosystem II oxygen evolving complex	19	4	2.32	59	0.1955	0.1955	0.1955
18	GO:0016459	myosin complex	13	3	1.59	61	0.2063	0.2063	0.2063
19	GO:0000148	1,3-beta-D-glucan synthase complex	7	2	0.86	64	0.2073	0.2073	0.2073
20	GO:0005801	cis-Golgi network	7	2	0.86	65	0.2073	0.2073	0.2073
S. melongena MM1597	GO.ID	CC Term	Annotated	Significant	Expected	Rank in classic	classic	weight	elim
1	GO:0009507	chloroplast	74	25	3.2	1	8.2e-17	8.2e-17	8.2e-17
2	GO:0033178	proton-transporting two-sector ATPase co...	47	10	2.03	3	2.3e-05	2.3e-05	2.3e-05
3	GO:0009521	photosystem	128	17	5.54	4	2.8e-05	2.8e-05	0.014
4	GO:0000148	1,3-beta-D-glucan synthase complex	7	2	0.3	19	0.034	0.034	0.034
5	GO:0033063	Rad51B-Rad51C-Rad51D-XRCC2 complex	1	1	0.04	22	0.043	0.043	0.043
6	GO:0009317	acetyl-CoA carboxylase complex	11	2	0.48	28	0.079	0.079	0.079
7	GO:0015935	small ribosomal subunit	55	5	2.38	29	0.088	0.088	0.088
8	GO:0000126	transcription factor TFIIIB complex	3	1	0.13	31	0.124	0.124	0.124
9	GO:0005674	transcription factor TFIIF complex	3	1	0.13	32	0.124	0.124	0.124
10	GO:0000178	exosome (RNase complex)	4	1	0.17	35	0.162	0.162	0.162
11	GO:0019898	extrinsic component of membrane	20	2	0.87	40	0.214	0.214	0.214
12	GO:0000922	spindle pole	6	1	0.26	42	0.233	0.233	0.233
13	GO:0030126	COPI vesicle coat	6	1	0.26	43	0.233	0.233	0.233
14	GO:0005839	proteasome core complex	23	2	1	48	0.263	0.263	0.263
15	GO:0031361	integral component of thylakoid membrane	7	1	0.3	49	0.267	0.267	0.267
16	GO:0048046	apoplast	46	3	1.99	52	0.321	0.321	0.321
17	GO:0048500	signal recognition particle	10	1	0.43	53	0.358	0.358	0.358
18	GO:0005840	ribosome	414	22	17.92	37	0.179	0.36	0.179
19	GO:0000775	chromosome, centromeric region	11	1	0.48	57	0.386	0.386	0.386
20	GO:0005643	nuclear pore	12	1	0.52	62	0.412	0.412	0.412
S. melongena DH_ECAVI	GO.ID	CC Term	Annotated	Significant	Expected	Rank in classic	classic	weight	elim
1	GO:0009507	chloroplast	74	24	3.17	1	7.9e-16	7.9e-16	7.9e-16
2	GO:0009521	photosystem	128	19	5.48	3	1.4e-06	1.2e-05	0.00372
3	GO:0033178	proton-transporting two-sector ATPase co...	47	9	2.01	10	0.00013	0.00013	0.00013
4	GO:0031931	TORC1 complex	4	2	0.17	18	0.01032	0.01032	0.01032
5	GO:0001527	microfibril	1	1	0.04	23	0.04279	0.04279	0.04279
6	GO:0044599	AP-5 adaptor complex	1	1	0.04	24	0.04279	0.04279	0.04279
7	GO:0009654	photosystem II oxygen evolving complex	19	3	0.81	27	0.04505	0.04505	0.04505
8	GO:0019898	extrinsic component of membrane	20	3	0.86	28	0.05138	0.05138	0.05138
9	GO:0005777	peroxisome	22	3	0.94	32	0.06526	0.06526	0.06526
10	GO:0009317	acetyl-CoA carboxylase complex	11	2	0.47	35	0.07768	0.07768	0.07768
11	GO:0045252	oxoglutarate dehydrogenase complex	2	1	0.09	36	0.08376	0.08376	0.08376
12	GO:0005674	transcription factor TFIIF complex	3	1	0.13	40	0.12298	0.12298	0.12298
13	GO:0005730	nucleolus	16	2	0.68	42	0.14774	0.14774	0.14774
14	GO:0017053	transcriptional repressor complex	4	1	0.17	44	0.16054	0.16054	0.16054
15	GO:0017119	Golgi transport complex	5	1	0.21	46	0.19649	0.19649	0.19649
16	GO:0015935	small ribosomal subunit	55	4	2.35	48	0.20759	0.20759	0.20759
17	GO:0030136	clathrin-coated vesicle	21	2	0.9	49	0.22596	0.22596	0.22596
18	GO:0000015	phosphopyruvate hydratase complex	6	1	0.26	50	0.23092	0.23092	0.23092
19	GO:0005839	proteasome core complex	23	2	0.98	51	0.25815	0.25815	0.25815
20	GO:0000148	1,3-beta-D-glucan synthase complex	7	1	0.3	52	0.26387	0.26387	0.26387
S. melongena AN-S-26	GO.ID	CC Term	Annotated	Significant	Expected	Rank in classic	classic	weight	elim
1	GO:0009507	chloroplast	74	22	3.35	1	3.6e-13	3.6e-13	3.6e-13
2	GO:0009521	photosystem	128	21	5.8	7	1.7e-07	1.7e-07	0.00041
3	GO:0033178	proton-transporting two-sector ATPase co...	47	9	2.13	11	0.0002	0.0002	0.0002
4	GO:0031361	integral component of thylakoid membrane	7	3	0.32	18	0.0028	0.0028	0.0028
5	GO:0098797	plasma membrane protein complex	16	3	0.72	22	0.0331	0.0331	0.03313
6	GO:0045259	proton-transporting ATP synthase complex	43	5	1.95	24	0.0431	0.0431	0.04311
7	GO:0044599	AP-5 adaptor complex	1	1	0.05	25	0.0453	0.0453	0.04531
8	GO:0009317	acetyl-CoA carboxylase complex	11	2	0.5	33	0.0858	0.0858	0.08582
9	GO:0009512	cytochrome b6f complex	2	1	0.09	34	0.0886	0.0886	0.08857
10	GO:0000126	transcription factor TFIIIB complex	3	1	0.14	35	0.1299	0.1299	0.12988
11	GO:0005674	transcription factor TFIIF complex	3	1	0.14	36	0.1299	0.1299	0.12988
12	GO:0009331	glycerol-3-phosphate dehydrogenase compl...	3	1	0.14	37	0.1299	0.1299	0.12988
13	GO:0005730	nucleolus	16	2	0.72	39	0.1619	0.1619	0.16192
14	GO:0031931	TORC1 complex	4	1	0.18	40	0.1693	0.1693	0.16933
15	GO:0015935	small ribosomal subunit	55	4	2.49	45	0.2372	0.2372	0.23725
16	GO:0000015	phosphopyruvate hydratase complex	6	1	0.27	46	0.243	0.243	0.24298
17	GO:0030130	clathrin coat of trans-Golgi network ves...	6	1	0.27	47	0.243	0.243	0.24298
18	GO:0005840	ribosome	414	23	18.76	42	0.1738	0.2541	0.17376
19	GO:0005777	peroxisome	22	2	1	58	0.2629	0.2629	0.26289
20	GO:0070652	HAUS complex	7	1	0.32	62	0.2773	0.2773	0.27733
S. melongena DH15	GO.ID	CC Term	Annotated	Significant	Expected	Rank in classic	classic	weight	elim
1	GO:0009507	chloroplast	74	18	3.54	1	5.3e-09	5.3e-09	5.3e-09
2	GO:0009521	photosystem	128	19	6.12	4	7.4e-06	7.4e-06	0.008
3	GO:0033178	proton-transporting two-sector ATPase co...	47	11	2.25	5	8.6e-06	8.6e-06	8.6e-06
4	GO:0005730	nucleolus	16	3	0.77	19	0.038	0.038	0.038
5	GO:0000148	1,3-beta-D-glucan synthase complex	7	2	0.33	20	0.041	0.041	0.041
6	GO:0046658	anchored component of plasma membrane	1	1	0.05	21	0.048	0.048	0.048
7	GO:0032040	small-subunit processome	9	2	0.43	23	0.066	0.066	0.066
8	GO:0005664	nuclear origin of replication recognitio...	2	1	0.1	27	0.093	0.093	0.093
9	GO:0009360	DNA polymerase III complex	2	1	0.1	28	0.093	0.093	0.093
10	GO:0009317	acetyl-CoA carboxylase complex	11	2	0.53	29	0.094	0.094	0.094
11	GO:0005839	proteasome core complex	23	3	1.1	31	0.094	0.094	0.094
12	GO:0000126	transcription factor TFIIIB complex	3	1	0.14	35	0.137	0.137	0.137
13	GO:0005674	transcription factor TFIIF complex	3	1	0.14	36	0.137	0.137	0.137
14	GO:0033588	Elongator holoenzyme complex	3	1	0.14	37	0.137	0.137	0.137
15	GO:0016602	CCAAT-binding factor complex	4	1	0.19	46	0.178	0.178	0.178
16	GO:0031931	TORC1 complex	4	1	0.19	47	0.178	0.178	0.178
17	GO:0016592	mediator complex	17	2	0.81	51	0.194	0.194	0.194
18	GO:0030123	AP-3 adaptor complex	17	2	0.81	52	0.194	0.194	0.194
19	GO:0000015	phosphopyruvate hydratase complex	6	1	0.29	58	0.255	0.255	0.255
20	GO:0000922	spindle pole	6	1	0.29	59	0.255	0.255	0.255
S. melongena A0416	GO.ID	CC Term	Annotated	Significant	Expected	Rank in classic	classic	weight	elim
1	GO:0009507	chloroplast	74	20	3.11	1	7.9e-12	7.9e-12	7.9e-12
2	GO:0009521	photosystem	128	20	5.38	6	2.2e-07	2.2e-07	0.00086
3	GO:0033178	proton-transporting two-sector ATPase co...	47	12	1.98	7	3e-07	3e-07	3e-07
4	GO:0009317	acetyl-CoA carboxylase complex	11	5	0.46	10	4.7e-05	4.7e-05	4.7e-05
5	GO:0031361	integral component of thylakoid membrane	7	2	0.29	19	0.032	0.032	0.03209
6	GO:0046658	anchored component of plasma membrane	1	1	0.04	22	0.042	0.042	0.04203
7	GO:0005777	peroxisome	22	3	0.92	25	0.063	0.063	0.06251
8	GO:0005874	microtubule	41	4	1.72	29	0.091	0.091	0.09146
9	GO:0005674	transcription factor TFIIF complex	3	1	0.13	38	0.121	0.121	0.1209
10	GO:0098797	plasma membrane protein complex	16	2	0.67	39	0.144	0.144	0.14354
11	GO:0016592	mediator complex	17	2	0.71	42	0.158	0.158	0.15839
12	GO:0005669	transcription factor TFIID complex	6	1	0.25	50	0.227	0.227	0.22727
13	GO:0030130	clathrin coat of trans-Golgi network ves...	6	1	0.25	51	0.227	0.227	0.22727
14	GO:0005839	proteasome core complex	23	2	0.97	61	0.252	0.252	0.25161
15	GO:0005885	Arp2/3 protein complex	8	1	0.34	65	0.291	0.291	0.29097
16	GO:0000775	chromosome, centromeric region	11	1	0.46	72	0.377	0.377	0.37686
17	GO:0016459	myosin complex	13	1	0.55	78	0.428	0.428	0.42829
18	GO:0005681	spliceosomal complex	14	1	0.59	82	0.452	0.452	0.4524
19	GO:0005840	ribosome	414	18	17.4	84	0.477	0.48	0.47735
20	GO:0005730	nucleolus	16	1	0.67	88	0.498	0.498	0.49763
S. melongena IVIA-371	GO.ID	CC Term	Annotated	Significant	Expected	Rank in classic	classic	weight	elim
1	GO:0009507	chloroplast	74	22	3.5	1	9e-13	9e-13	9e-13
2	GO:0009521	photosystem	128	17	6.06	5	8.7e-05	8.7e-05	0.00803
3	GO:0033178	proton-transporting two-sector ATPase co...	47	9	2.22	8	0.00028	0.00028	0.00028
4	GO:0005846	nuclear cap binding complex	3	2	0.14	12	0.00647	0.00647	0.00647
5	GO:0009317	acetyl-CoA carboxylase complex	11	3	0.52	15	0.01298	0.01298	0.01298
6	GO:0005839	proteasome core complex	23	4	1.09	18	0.02121	0.02121	0.02121
7	GO:0005730	nucleolus	16	3	0.76	21	0.03704	0.03704	0.03704
8	GO:0098797	plasma membrane protein complex	16	3	0.76	22	0.03704	0.03704	0.03704
9	GO:0031361	integral component of thylakoid membrane	7	2	0.33	23	0.03997	0.03997	0.03997
10	GO:0015935	small ribosomal subunit	55	6	2.6	25	0.04378	0.04378	0.04378
11	GO:0000126	transcription factor TFIIIB complex	3	1	0.14	48	0.13538	0.13538	0.13538
12	GO:0005674	transcription factor TFIIF complex	3	1	0.14	49	0.13538	0.13538	0.13538
13	GO:0005887	integral component of plasma membrane	3	1	0.14	50	0.13538	0.13538	0.13538
14	GO:0016602	CCAAT-binding factor complex	4	1	0.19	53	0.17632	0.17632	0.17632
15	GO:0031931	TORC1 complex	4	1	0.19	54	0.17632	0.17632	0.17632
16	GO:0019898	extrinsic component of membrane	20	3	0.95	32	0.06572	0.20682	0.06572
17	GO:0000015	phosphopyruvate hydratase complex	6	1	0.28	63	0.25252	0.25252	0.25252
18	GO:0030130	clathrin coat of trans-Golgi network ves...	6	1	0.28	64	0.25252	0.25252	0.25252
19	GO:0005777	peroxisome	22	2	1.04	72	0.27962	0.27962	0.27962
20	GO:0070652	HAUS complex	7	1	0.33	74	0.28794	0.28794	0.28794
S. melongena ASI-S-1	GO.ID	CC Term	Annotated	Significant	Expected	Rank in classic	classic	weight	elim
1	GO:0033178	proton-transporting two-sector ATPase co...	47	15	2.01	1	3.6e-10	3.6e-10	3.7e-08
2	GO:0009507	chloroplast	74	18	3.17	3	8.5e-10	8.5e-10	8.5e-10
3	GO:0009521	photosystem	128	22	5.48	7	1.2e-08	1.2e-08	0.00023
4	GO:0009317	acetyl-CoA carboxylase complex	11	3	0.47	16	0.0099	0.0099	0.00985
5	GO:0015935	small ribosomal subunit	55	6	2.35	19	0.0287	0.0287	0.02868
6	GO:0031361	integral component of thylakoid membrane	7	2	0.3	20	0.0332	0.0332	0.03317
7	GO:0034709	methylosome	1	1	0.04	23	0.0428	0.0428	0.04279
8	GO:0034715	pICln-Sm protein complex	1	1	0.04	24	0.0428	0.0428	0.04279
9	GO:0000775	chromosome, centromeric region	11	2	0.47	26	0.0777	0.0777	0.07768
10	GO:0072546	ER membrane protein complex	2	1	0.09	27	0.0838	0.0838	0.08376
11	GO:0000145	exocyst	28	3	1.2	31	0.1156	0.1156	0.11557
12	GO:0000126	transcription factor TFIIIB complex	3	1	0.13	37	0.123	0.123	0.12298
13	GO:0005674	transcription factor TFIIF complex	3	1	0.13	38	0.123	0.123	0.12298
14	GO:0000015	phosphopyruvate hydratase complex	6	1	0.26	45	0.2309	0.2309	0.23092
15	GO:0000922	spindle pole	6	1	0.26	46	0.2309	0.2309	0.23092
16	GO:0045263	proton-transporting ATP synthase complex...	24	2	1.03	50	0.2743	0.2743	0.27429
17	GO:0019773	proteasome core complex, alpha-subunit c...	10	1	0.43	54	0.3546	0.3546	0.35456
18	GO:0031011	Ino80 complex	11	1	0.47	55	0.3822	0.3822	0.38225
19	GO:0005829	cytosol	17	2	0.73	41	0.1629	0.4073	0.16295
20	GO:0005643	nuclear pore	12	1	0.51	59	0.4088	0.4088	0.40875

## Sheet: Supplementary data S6-3
Supplementary data S6-3: Molecular Function (MF) GO Term Enrichment analysis on the genes that present a high impact variant from the SNPeff analysis. P-values are sorted by "weight" algorithm column. In gray significant terms.
S. incanum MM577	GO.ID	MF Term	Annotated	Significant	Expected	Rank in classic	classic	weight	elim
1	GO:0043531	ADP binding	243	89	33.55	1	2.2e-19	2.2e-19	2.2e-19
2	GO:0003678	DNA helicase activity	75	27	10.35	9	1.1e-06	1.6e-06	1.1e-06
3	GO:0016984	ribulose-bisphosphate carboxylase activi...	12	8	1.66	14	3.8e-05	3.8e-05	3.8e-05
4	GO:0016893	endonuclease activity, active with eithe...	56	18	7.73	19	0.00035	0.00035	0.1015
5	GO:0030554	adenyl nucleotide binding	2157	393	297.8	2	2.8e-10	0.00049	0.6733
6	GO:0045156	electron transporter, transferring elect...	37	12	5.11	32	0.00303	0.00303	0.003
7	GO:0016758	transferase activity, transferring hexos...	364	70	50.25	28	0.00222	0.00312	0.0022
8	GO:0034062	5'-3' RNA polymerase activity	107	25	14.77	37	0.00509	0.00509	0.0051
9	GO:0008234	cysteine-type peptidase activity	93	23	12.84	33	0.00334	0.0059	0.0033
10	GO:0046906	tetrapyrrole binding	492	86	67.93	42	0.01139	0.01139	0.0114
11	GO:0000287	magnesium ion binding	128	27	17.67	43	0.01501	0.01501	0.015
12	GO:0016868	intramolecular transferase activity, pho...	12	5	1.66	45	0.01702	0.01702	0.017
13	GO:0003913	DNA photolyase activity	2	2	0.28	46	0.01905	0.01905	0.0191
14	GO:0010333	terpene synthase activity	42	11	5.8	50	0.02417	0.02417	0.0242
15	GO:0016705	oxidoreductase activity, acting on paire...	383	67	52.88	49	0.02294	0.02724	0.0229
16	GO:0010181	FMN binding	39	10	5.38	53	0.03538	0.03538	0.0354
17	GO:0004356	glutamate-ammonia ligase activity	6	3	0.83	55	0.03799	0.03799	0.038
18	GO:0003849	3-deoxy-7-phosphoheptulonate synthase ac...	3	2	0.41	62	0.0519	0.0519	0.0519
19	GO:0004140	dephospho-CoA kinase activity	3	2	0.41	63	0.0519	0.0519	0.0519
20	GO:0004514	nicotinate-nucleotide diphosphorylase (c...	3	2	0.41	64	0.0519	0.0519	0.0519
21	GO:0004827	proline-tRNA ligase activity	3	2	0.41	65	0.0519	0.0519	0.0519
22	GO:0046961	proton-transporting ATPase activity, rot...	26	7	3.59	68	0.05759	0.05759	0.0576
23	GO:0030246	carbohydrate binding	115	23	15.88	61	0.04104	0.06327	0.041
24	GO:0016782	transferase activity, transferring sulfu...	32	8	4.42	72	0.0647	0.0647	0.0647
25	GO:0008131	primary amine oxidase activity	12	4	1.66	74	0.07177	0.07177	0.0718
26	GO:0003774	motor activity	75	15	10.35	77	0.08658	0.08658	0.0866
27	GO:0008649	rRNA methyltransferase activity	6	3	0.83	56	0.03799	0.09432	0.038
28	GO:0005506	iron ion binding	410	66	56.6	79	0.09995	0.09995	0.1
29	GO:0016702	oxidoreductase activity, acting on singl...	41	9	5.66	81	0.10334	0.10334	0.1033
30	GO:0004970	ionotropic glutamate receptor activity	9	3	1.24	84	0.11625	0.11625	0.1163
31	GO:0018024	histone-lysine N-methyltransferase activ...	20	5	2.76	98	0.13139	0.13139	0.1314
32	GO:0003923	GPI-anchor transamidase activity	1	1	0.14	103	0.13806	0.13806	0.1381
33	GO:0004108	citrate (Si)-synthase activity	1	1	0.14	104	0.13806	0.13806	0.1381
34	GO:0004150	dihydroneopterin aldolase activity	1	1	0.14	105	0.13806	0.13806	0.1381
35	GO:0004360	glutamine-fructose-6-phosphate transamin...	1	1	0.14	106	0.13806	0.13806	0.1381
36	GO:0004516	nicotinate phosphoribosyltransferase act...	1	1	0.14	107	0.13806	0.13806	0.1381
37	GO:0004815	aspartate-tRNA ligase activity	1	1	0.14	108	0.13806	0.13806	0.1381
38	GO:0008381	mechanosensitive ion channel activity	1	1	0.14	109	0.13806	0.13806	0.1381
39	GO:0008762	UDP-N-acetylmuramate dehydrogenase activ...	1	1	0.14	110	0.13806	0.13806	0.1381
40	GO:0008821	crossover junction endodeoxyribonuclease...	1	1	0.14	111	0.13806	0.13806	0.1381
S. melongena MM1597	GO.ID	MF Term	Annotated	Significant	Expected	Rank in classic	classic	weight	elim
1	GO:0032559	adenyl ribonucleotide binding	2153	139	84.03	3	4.3e-10	4.3e-10	1
2	GO:0008144	drug binding	2015	118	78.64	15	2.5e-06	2.4e-06	0.20071
3	GO:0046906	tetrapyrrole binding	492	41	19.2	16	4e-06	4e-06	0.01078
4	GO:0016705	oxidoreductase activity, acting on paire...	383	32	14.95	19	4.4e-05	4.4e-05	4.4e-05
5	GO:0045156	electron transporter, transferring elect...	37	8	1.44	21	7.3e-05	7.3e-05	7.3e-05
6	GO:0004525	ribonuclease III activity	21	6	0.82	22	0.00011	0.00011	0.00011
7	GO:0005506	iron ion binding	410	32	16	24	0.00016	0.00016	0.00016
8	GO:0034062	5'-3' RNA polymerase activity	107	13	4.18	26	0.00027	0.00027	0.057
9	GO:0046933	proton-transporting ATP synthase activit...	29	6	1.13	33	0.00076	0.00076	0.00076
10	GO:0036094	small molecule binding	3082	184	120.28	2	1.5e-10	0.00416	0.01453
11	GO:0097367	carbohydrate derivative binding	2475	156	96.59	1	1.4e-10	0.00739	0.06127
12	GO:0003989	acetyl-CoA carboxylase activity	12	3	0.47	45	0.00999	0.00999	0.00999
13	GO:0016868	intramolecular transferase activity, pho...	12	3	0.47	46	0.00999	0.00999	0.00999
14	GO:0016984	ribulose-bisphosphate carboxylase activi...	12	3	0.47	47	0.00999	0.00999	0.00999
15	GO:0042626	ATPase activity, coupled to transmembran...	89	12	3.47	25	0.00017	0.02222	0.02799
16	GO:0003843	1,3-beta-D-glucan synthase activity	7	2	0.27	54	0.02803	0.02803	0.02803
17	GO:0019843	rRNA binding	31	4	1.21	56	0.03134	0.03134	0.03134
18	GO:0003980	UDP-glucose:glycoprotein glucosyltransfe...	1	1	0.04	62	0.03903	0.03903	0.03903
19	GO:0004019	adenylosuccinate synthase activity	1	1	0.04	63	0.03903	0.03903	0.03903
20	GO:0004108	citrate (Si)-synthase activity	1	1	0.04	64	0.03903	0.03903	0.03903
21	GO:0004342	glucosamine-6-phosphate deaminase activi...	1	1	0.04	65	0.03903	0.03903	0.03903
22	GO:0004641	phosphoribosylformylglycinamidine cyclo-...	1	1	0.04	66	0.03903	0.03903	0.03903
23	GO:0008430	selenium binding	1	1	0.04	67	0.03903	0.03903	0.03903
24	GO:0008863	formate dehydrogenase (NAD+) activity	1	1	0.04	68	0.03903	0.03903	0.03903
25	GO:0009378	four-way junction helicase activity	1	1	0.04	69	0.03903	0.03903	0.03903
26	GO:0046524	sucrose-phosphate synthase activity	1	1	0.04	70	0.03903	0.03903	0.03903
27	GO:0003995	acyl-CoA dehydrogenase activity	10	2	0.39	80	0.05559	0.05559	0.05559
28	GO:0000287	magnesium ion binding	128	9	5	84	0.06308	0.06308	0.06308
29	GO:0003713	transcription coactivator activity	2	1	0.08	85	0.07653	0.07653	0.07653
30	GO:0036361	racemase activity, acting on amino acids...	2	1	0.08	86	0.07653	0.07653	0.07653
31	GO:0052866	phosphatidylinositol phosphate phosphata...	2	1	0.08	87	0.07653	0.07653	0.07653
32	GO:0046961	proton-transporting ATPase activity, rot...	26	3	1.01	91	0.07914	0.07914	0.07914
33	GO:0015095	magnesium ion transmembrane transporter ...	13	2	0.51	96	0.08927	0.08927	0.08927
34	GO:0003735	structural constituent of ribosome	415	22	16.2	97	0.09045	0.09045	0.09045
35	GO:0005544	calcium-dependent phospholipid binding	14	2	0.55	102	0.10155	0.10155	0.10155
36	GO:0019904	protein domain specific binding	14	2	0.55	103	0.10155	0.10155	0.10155
37	GO:0008137	NADH dehydrogenase (ubiquinone) activity	29	3	1.13	104	0.10225	0.10225	0.10225
38	GO:0003871	5-methyltetrahydropteroyltriglutamate-ho...	3	1	0.12	108	0.11258	0.11258	0.11258
39	GO:0003906	DNA-(apurinic or apyrimidinic site) endo...	3	1	0.12	109	0.11258	0.11258	0.11258
40	GO:0004045	aminoacyl-tRNA hydrolase activity	3	1	0.12	110	0.11258	0.11258	0.11258
S. melongena DH_ECAVI	GO.ID	MF Term	Annotated	Significant	Expected	Rank in classic	classic	weight	elim
1	GO:0034062	5'-3' RNA polymerase activity	107	20	4.32	3	8.7e-09	8.7e-09	1
2	GO:0032559	adenyl ribonucleotide binding	2153	132	86.96	6	2.9e-07	2.9e-07	0.13951
3	GO:0097367	carbohydrate derivative binding	2475	154	99.96	2	6.9e-09	5.3e-06	0.00223
4	GO:0045156	electron transporter, transferring elect...	37	9	1.49	17	1.2e-05	1.2e-05	1.2e-05
5	GO:0008144	drug binding	2015	112	81.39	21	0.00021	0.00068	0.0241
6	GO:0046933	proton-transporting ATP synthase activit...	29	6	1.17	23	0.00091	0.00091	0.00091
7	GO:0016168	chlorophyll binding	38	6	1.53	29	0.00388	0.00388	0.00388
8	GO:0004525	ribonuclease III activity	21	4	0.85	34	0.00911	0.00911	0.00911
9	GO:0016984	ribulose-bisphosphate carboxylase activi...	12	3	0.48	37	0.01098	0.01098	0.01098
10	GO:0000287	magnesium ion binding	128	11	5.17	40	0.01457	0.01457	0.01457
11	GO:0016833	oxo-acid-lyase activity	5	2	0.2	45	0.01501	0.01501	0.01501
12	GO:0004019	adenylosuccinate synthase activity	1	1	0.04	52	0.04039	0.04039	0.04039
13	GO:0004108	citrate (Si)-synthase activity	1	1	0.04	53	0.04039	0.04039	0.04039
14	GO:0009378	four-way junction helicase activity	1	1	0.04	54	0.04039	0.04039	0.04039
15	GO:0008235	metalloexopeptidase activity	10	2	0.4	63	0.05911	0.05911	0.05911
16	GO:0030145	manganese ion binding	38	4	1.53	64	0.06589	0.06589	0.06589
17	GO:0030170	pyridoxal phosphate binding	89	7	3.59	65	0.06816	0.06816	0.06816
18	GO:0003868	4-hydroxyphenylpyruvate dioxygenase acti...	2	1	0.08	71	0.07915	0.07915	0.07915
19	GO:0004149	dihydrolipoyllysine-residue succinyltran...	2	1	0.08	72	0.07915	0.07915	0.07915
20	GO:0004615	phosphomannomutase activity	2	1	0.08	73	0.07915	0.07915	0.07915
21	GO:0004806	triglyceride lipase activity	2	1	0.08	74	0.07915	0.07915	0.07915
22	GO:0008441	3'(2'),5'-bisphosphate nucleotidase acti...	2	1	0.08	75	0.07915	0.07915	0.07915
23	GO:0036361	racemase activity, acting on amino acids...	2	1	0.08	76	0.07915	0.07915	0.07915
24	GO:0052866	phosphatidylinositol phosphate phosphata...	2	1	0.08	77	0.07915	0.07915	0.07915
25	GO:0003989	acetyl-CoA carboxylase activity	12	2	0.48	82	0.08224	0.08224	0.08224
26	GO:0004177	aminopeptidase activity	12	2	0.48	83	0.08224	0.08224	0.08224
27	GO:0046961	proton-transporting ATPase activity, rot...	26	3	1.05	87	0.08574	0.08574	0.08574
28	GO:0036094	small molecule binding	3082	184	124.48	1	3.2e-09	0.08997	0.00103
29	GO:0009678	hydrogen-translocating pyrophosphatase a...	14	2	0.57	92	0.1076	0.1076	0.1076
30	GO:0003871	5-methyltetrahydropteroyltriglutamate-ho...	3	1	0.12	94	0.11635	0.11635	0.11635
31	GO:0003906	DNA-(apurinic or apyrimidinic site) endo...	3	1	0.12	95	0.11635	0.11635	0.11635
32	GO:0003997	acyl-CoA oxidase activity	3	1	0.12	96	0.11635	0.11635	0.11635
33	GO:0004140	dephospho-CoA kinase activity	3	1	0.12	97	0.11635	0.11635	0.11635
34	GO:0004618	phosphoglycerate kinase activity	3	1	0.12	98	0.11635	0.11635	0.11635
35	GO:0005338	nucleotide-sugar transmembrane transport...	3	1	0.12	99	0.11635	0.11635	0.11635
36	GO:0017089	glycolipid transporter activity	3	1	0.12	100	0.11635	0.11635	0.11635
37	GO:0043141	ATP-dependent 5'-3' DNA helicase activit...	3	1	0.12	101	0.11635	0.11635	0.11635
38	GO:0050307	sucrose-phosphate phosphatase activity	3	1	0.12	102	0.11635	0.11635	0.11635
39	GO:0051920	peroxiredoxin activity	3	1	0.12	103	0.11635	0.11635	0.11635
40	GO:0004499	N,N-dimethylaniline monooxygenase activi...	15	2	0.61	107	0.12097	0.12097	0.12097
S. melongena AN-S-26	GO.ID	MF Term	Annotated	Significant	Expected	Rank in classic	classic	weight	elim
1	GO:0003899	DNA-directed 5'-3' RNA polymerase activi...	84	17	3.26	3	1.8e-08	1.8e-08	1.8e-08
2	GO:0043531	ADP binding	243	30	9.42	4	2e-08	2e-08	2e-08
3	GO:0045156	electron transporter, transferring elect...	37	11	1.43	7	9.2e-08	9.2e-08	9.2e-08
4	GO:0016168	chlorophyll binding	38	9	1.47	19	1.1e-05	1.1e-05	1.1e-05
5	GO:0097367	carbohydrate derivative binding	2475	151	95.92	1	2e-09	2.7e-05	0.0026
6	GO:0046933	proton-transporting ATP synthase activit...	29	7	1.12	21	9.4e-05	9.4e-05	9.4e-05
7	GO:0032559	adenyl ribonucleotide binding	2153	129	83.44	10	1.4e-07	0.00037	1
8	GO:0008144	drug binding	2015	105	78.09	28	0.00078	0.00063	0.2128
9	GO:0004525	ribonuclease III activity	21	5	0.81	29	0.00104	0.00104	0.001
10	GO:0000287	magnesium ion binding	128	13	4.96	32	0.00139	0.00139	0.0014
11	GO:0080019	fatty-acyl-CoA reductase (alcohol-formin...	14	4	0.54	33	0.00164	0.00164	0.0016
12	GO:0005506	iron ion binding	410	26	15.89	45	0.00965	0.00965	0.0097
13	GO:0016868	intramolecular transferase activity, pho...	12	3	0.47	46	0.0098	0.0098	0.0098
14	GO:0016984	ribulose-bisphosphate carboxylase activi...	12	3	0.47	47	0.0098	0.0098	0.0098
15	GO:0045158	electron transporter, transferring elect...	5	2	0.19	56	0.01387	0.01387	0.0139
16	GO:0020037	heme binding	456	27	17.67	59	0.01929	0.01929	0.0193
17	GO:0010333	terpene synthase activity	42	5	1.63	62	0.0224	0.0224	0.0224
18	GO:0003843	1,3-beta-D-glucan synthase activity	7	2	0.27	66	0.02766	0.02766	0.0277
19	GO:0016872	intramolecular lyase activity	7	2	0.27	67	0.02766	0.02766	0.0277
20	GO:0051287	NAD binding	61	6	2.36	70	0.03027	0.03027	0.0303
21	GO:0019843	rRNA binding	31	4	1.2	71	0.03065	0.03065	0.0307
22	GO:0003735	structural constituent of ribosome	415	24	16.08	72	0.03342	0.03342	0.0334
23	GO:0048038	quinone binding	33	4	1.28	73	0.03754	0.03754	0.0375
24	GO:0004108	citrate (Si)-synthase activity	1	1	0.04	74	0.03875	0.03875	0.0388
25	GO:0008676	3-deoxy-8-phosphooctulonate synthase act...	1	1	0.04	75	0.03875	0.03875	0.0388
26	GO:0017070	U6 snRNA binding	1	1	0.04	76	0.03875	0.03875	0.0388
27	GO:0030623	U5 snRNA binding	1	1	0.04	77	0.03875	0.03875	0.0388
28	GO:0046406	magnesium protoporphyrin IX methyltransf...	1	1	0.04	78	0.03875	0.03875	0.0388
29	GO:0016651	oxidoreductase activity, acting on NAD(P...	62	7	2.4	48	0.00984	0.04086	0.0098
30	GO:0015405	P-P-bond-hydrolysis-driven transmembrane...	110	13	4.26	22	0.00033	0.04324	0.0905
31	GO:0004970	ionotropic glutamate receptor activity	9	2	0.35	81	0.04505	0.04505	0.0451
32	GO:0042301	phosphate ion binding	9	2	0.35	82	0.04505	0.04505	0.0451
33	GO:0010181	FMN binding	39	4	1.51	95	0.06308	0.06308	0.0631
34	GO:0004418	hydroxymethylbilane synthase activity	2	1	0.08	98	0.07601	0.07601	0.076
35	GO:0004844	uracil DNA N-glycosylase activity	2	1	0.08	99	0.07601	0.07601	0.076
36	GO:0004930	G protein-coupled receptor activity	2	1	0.08	100	0.07601	0.07601	0.076
37	GO:0010285	L,L-diaminopimelate aminotransferase act...	2	1	0.08	101	0.07601	0.07601	0.076
38	GO:0016428	tRNA (cytosine-5-)-methyltransferase act...	2	1	0.08	102	0.07601	0.07601	0.076
39	GO:0036361	racemase activity, acting on amino acids...	2	1	0.08	103	0.07601	0.07601	0.076
40	GO:0003989	acetyl-CoA carboxylase activity	12	2	0.47	108	0.07654	0.07654	0.0765
S. melongena DH15	GO.ID	MF Term	Annotated	Significant	Expected	Rank in classic	classic	weight	elim
1	GO:0032559	adenyl ribonucleotide binding	2153	146	93.85	2	1.3e-08	1.3e-08	1
2	GO:0034062	5'-3' RNA polymerase activity	107	17	4.66	14	3.6e-06	3.6e-06	0.07355
3	GO:0016168	chlorophyll binding	38	8	1.66	20	0.00019	0.00019	0.00019
4	GO:0097367	carbohydrate derivative binding	2475	165	107.89	1	3.5e-09	0.00032	0.05772
5	GO:0044769	ATPase activity, coupled to transmembran...	35	6	1.53	28	0.00369	0.00369	0.23346
6	GO:0045156	electron transporter, transferring elect...	37	6	1.61	29	0.00491	0.00491	0.00491
7	GO:0003871	5-methyltetrahydropteroyltriglutamate-ho...	3	2	0.13	30	0.00553	0.00553	0.00553
8	GO:0046556	alpha-L-arabinofuranosidase activity	4	2	0.17	40	0.01073	0.01073	0.01073
9	GO:0016868	intramolecular transferase activity, pho...	12	3	0.52	41	0.01351	0.01351	0.01351
10	GO:0016984	ribulose-bisphosphate carboxylase activi...	12	3	0.52	42	0.01351	0.01351	0.01351
11	GO:0080019	fatty-acyl-CoA reductase (alcohol-formin...	14	3	0.61	46	0.02094	0.02094	0.02094
12	GO:0000287	magnesium ion binding	128	11	5.58	47	0.02412	0.02412	0.02412
13	GO:0004356	glutamate-ammonia ligase activity	6	2	0.26	49	0.02532	0.02532	0.02532
14	GO:0008889	glycerophosphodiester phosphodiesterase ...	6	2	0.26	50	0.02532	0.02532	0.02532
15	GO:0003843	1,3-beta-D-glucan synthase activity	7	2	0.31	58	0.03443	0.03443	0.03443
16	GO:0008536	Ran GTPase binding	7	2	0.31	59	0.03443	0.03443	0.03443
17	GO:0008137	NADH dehydrogenase (ubiquinone) activity	29	4	1.26	62	0.03577	0.03577	0.03577
18	GO:0004004	ATP-dependent RNA helicase activity	1	1	0.04	66	0.04359	0.04359	0.04359
19	GO:0004019	adenylosuccinate synthase activity	1	1	0.04	67	0.04359	0.04359	0.04359
20	GO:0004108	citrate (Si)-synthase activity	1	1	0.04	68	0.04359	0.04359	0.04359
21	GO:0009378	four-way junction helicase activity	1	1	0.04	69	0.04359	0.04359	0.04359
22	GO:0046554	malate dehydrogenase (NADP+) activity	1	1	0.04	70	0.04359	0.04359	0.04359
23	GO:0019843	rRNA binding	31	4	1.35	75	0.04428	0.04428	0.04428
24	GO:0004525	ribonuclease III activity	21	3	0.92	80	0.06117	0.06117	0.06117
25	GO:0003995	acyl-CoA dehydrogenase activity	10	2	0.44	82	0.06769	0.06769	0.06769
26	GO:0004298	threonine-type endopeptidase activity	22	3	0.96	83	0.06862	0.06862	0.06862
27	GO:0000049	tRNA binding	11	2	0.48	86	0.08041	0.08041	0.08041
28	GO:0015631	tubulin binding	86	7	3.75	87	0.08101	0.08101	0.08101
29	GO:0008168	methyltransferase activity	218	16	9.5	55	0.02934	0.08326	0.08628
30	GO:0004418	hydroxymethylbilane synthase activity	2	1	0.09	88	0.08528	0.08528	0.08528
31	GO:0036361	racemase activity, acting on amino acids...	2	1	0.09	89	0.08528	0.08528	0.08528
32	GO:0003989	acetyl-CoA carboxylase activity	12	2	0.52	94	0.09379	0.09379	0.09379
33	GO:0016884	carbon-nitrogen ligase activity, with gl...	26	3	1.13	99	0.10215	0.10215	0.10215
34	GO:0042626	ATPase activity, coupled to transmembran...	89	11	3.88	25	0.00165	0.10679	0.04481
35	GO:0003774	motor activity	75	6	3.27	102	0.10832	0.10832	0.10832
36	GO:0010333	terpene synthase activity	42	4	1.83	103	0.10909	0.10909	0.10909
37	GO:0003714	transcription corepressor activity	3	1	0.13	107	0.12516	0.12516	0.12516
38	GO:0003906	DNA-(apurinic or apyrimidinic site) endo...	3	1	0.13	108	0.12516	0.12516	0.12516
39	GO:0003997	acyl-CoA oxidase activity	3	1	0.13	109	0.12516	0.12516	0.12516
40	GO:0004140	dephospho-CoA kinase activity	3	1	0.13	110	0.12516	0.12516	0.12516
S. melongena A0416	GO.ID	MF Term	Annotated	Significant	Expected	Rank in classic	classic	weight	elim
1	GO:0034062	5'-3' RNA polymerase activity	107	23	4.01	1	7.5e-12	7.5e-12	1
2	GO:0043531	ADP binding	243	28	9.1	10	1.3e-07	1.3e-07	1.3e-07
3	GO:0045156	electron transporter, transferring elect...	37	9	1.39	19	6.6e-06	6.6e-06	6.6e-06
4	GO:0016168	chlorophyll binding	38	9	1.42	20	8.4e-06	8.4e-06	8.4e-06
5	GO:0003989	acetyl-CoA carboxylase activity	12	5	0.45	21	4.6e-05	4.6e-05	4.6e-05
6	GO:0001882	nucleoside binding	268	20	10.04	36	0.00272	0.00011	1
7	GO:0046933	proton-transporting ATP synthase activit...	29	6	1.09	29	0.00061	0.00061	0.00061
8	GO:0016984	ribulose-bisphosphate carboxylase activi...	12	4	0.45	30	0.00076	0.00076	0.00076
9	GO:0032559	adenyl ribonucleotide binding	2153	122	80.65	16	1e-06	0.00099	1
10	GO:0043168	anion binding	2762	152	103.47	11	1.7e-07	0.00126	0.37467
11	GO:0008144	drug binding	2015	100	75.48	31	0.00168	0.00143	0.19413
12	GO:0051287	NAD binding	61	8	2.29	34	0.00189	0.00189	0.00189
13	GO:0005506	iron ion binding	410	27	15.36	40	0.00331	0.00331	0.00331
14	GO:0005200	structural constituent of cytoskeleton	21	4	0.79	43	0.00702	0.00702	0.00702
15	GO:0020037	heme binding	456	28	17.08	44	0.00726	0.00726	0.00726
16	GO:0015405	P-P-bond-hydrolysis-driven transmembrane...	110	13	4.12	25	0.00024	0.01193	0.03063
17	GO:0046961	proton-transporting ATPase activity, rot...	26	4	0.97	51	0.01512	0.01512	0.01512
18	GO:0016891	endoribonuclease activity, producing 5'-...	54	6	2.02	53	0.01514	0.01514	0.01514
19	GO:0004356	glutamate-ammonia ligase activity	6	2	0.22	55	0.01901	0.01901	0.01901
20	GO:0008889	glycerophosphodiester phosphodiesterase ...	6	2	0.22	56	0.01901	0.01901	0.01901
21	GO:0000287	magnesium ion binding	128	10	4.79	61	0.02206	0.02206	0.02206
22	GO:0016705	oxidoreductase activity, acting on paire...	383	24	14.35	46	0.00981	0.02238	0.00981
23	GO:0048038	quinone binding	33	4	1.24	66	0.03375	0.03375	0.03375
24	GO:0016651	oxidoreductase activity, acting on NAD(P...	62	6	2.32	63	0.02812	0.03695	0.02812
25	GO:0005267	potassium channel activity	20	3	0.75	68	0.0371	0.0371	0.0371
26	GO:0004108	citrate (Si)-synthase activity	1	1	0.04	70	0.03746	0.03746	0.03746
27	GO:0004360	glutamine-fructose-6-phosphate transamin...	1	1	0.04	71	0.03746	0.03746	0.03746
28	GO:0004610	phosphoacetylglucosamine mutase activity	1	1	0.04	72	0.03746	0.03746	0.03746
29	GO:0045145	single-stranded DNA 5'-3' exodeoxyribonu...	1	1	0.04	73	0.03746	0.03746	0.03746
30	GO:0003995	acyl-CoA dehydrogenase activity	10	2	0.37	88	0.05165	0.05165	0.05165
31	GO:0010333	terpene synthase activity	42	4	1.57	95	0.07121	0.07121	0.07121
32	GO:0004674	protein serine/threonine kinase activity	78	6	2.92	96	0.07193	0.07193	0.07193
33	GO:0003868	4-hydroxyphenylpyruvate dioxygenase acti...	2	1	0.07	100	0.07352	0.07352	0.07352
34	GO:0004844	uracil DNA N-glycosylase activity	2	1	0.07	101	0.07352	0.07352	0.07352
35	GO:0010285	L,L-diaminopimelate aminotransferase act...	2	1	0.07	102	0.07352	0.07352	0.07352
36	GO:0036361	racemase activity, acting on amino acids...	2	1	0.07	103	0.07352	0.07352	0.07352
37	GO:0052866	phosphatidylinositol phosphate phosphata...	2	1	0.07	104	0.07352	0.07352	0.07352
38	GO:0003871	5-methyltetrahydropteroyltriglutamate-ho...	3	1	0.11	118	0.10823	0.10823	0.10823
39	GO:0003906	DNA-(apurinic or apyrimidinic site) endo...	3	1	0.11	119	0.10823	0.10823	0.10823
40	GO:0003997	acyl-CoA oxidase activity	3	1	0.11	120	0.10823	0.10823	0.10823
S. melongena IVIA-371	GO.ID	MF Term	Annotated	Significant	Expected	Rank in classic	classic	weight	elim
1	GO:0032559	adenyl ribonucleotide binding	2153	153	92.38	3	5e-11	5e-11	1
2	GO:0034062	5'-3' RNA polymerase activity	107	19	4.59	12	1.3e-07	1.3e-07	0.01459
3	GO:0045156	electron transporter, transferring elect...	37	10	1.59	14	2.4e-06	2.4e-06	2.4e-06
4	GO:0008144	drug binding	2015	126	86.46	16	5.5e-06	9e-06	0.1464
5	GO:0097367	carbohydrate derivative binding	2475	173	106.2	1	6.2e-12	4.2e-05	0.0245
6	GO:0000287	magnesium ion binding	128	15	5.49	24	0.00039	0.00039	0.00039
7	GO:0016168	chlorophyll binding	38	7	1.63	26	0.00102	0.00102	0.00102
8	GO:0016984	ribulose-bisphosphate carboxylase activi...	12	4	0.51	27	0.00126	0.00126	0.00126
9	GO:0000339	RNA cap binding	3	2	0.13	32	0.00536	0.00536	0.00536
10	GO:0046933	proton-transporting ATP synthase activit...	29	5	1.24	36	0.00723	0.00723	0.00723
11	GO:0010333	terpene synthase activity	42	6	1.8	38	0.00857	0.00857	0.00857
12	GO:0003989	acetyl-CoA carboxylase activity	12	3	0.51	40	0.01294	0.01294	0.01294
13	GO:0042626	ATPase activity, coupled to transmembran...	89	11	3.82	28	0.00145	0.01295	0.04201
14	GO:0004298	threonine-type endopeptidase activity	22	4	0.94	43	0.01326	0.01326	0.01326
15	GO:0003777	microtubule motor activity	62	7	2.66	48	0.01649	0.01649	0.01649
16	GO:0004372	glycine hydroxymethyltransferase activit...	6	2	0.26	51	0.02458	0.02458	0.02458
17	GO:0008017	microtubule binding	75	7	3.22	55	0.04157	0.04157	0.04157
18	GO:0003904	deoxyribodipyrimidine photo-lyase activi...	1	1	0.04	57	0.04291	0.04291	0.04291
19	GO:0003980	UDP-glucose:glycoprotein glucosyltransfe...	1	1	0.04	58	0.04291	0.04291	0.04291
20	GO:0004108	citrate (Si)-synthase activity	1	1	0.04	59	0.04291	0.04291	0.04291
21	GO:0016756	glutathione gamma-glutamylcysteinyltrans...	1	1	0.04	60	0.04291	0.04291	0.04291
22	GO:0034450	ubiquitin-ubiquitin ligase activity	1	1	0.04	61	0.04291	0.04291	0.04291
23	GO:0045145	single-stranded DNA 5'-3' exodeoxyribonu...	1	1	0.04	62	0.04291	0.04291	0.04291
24	GO:0052855	ADP-dependent NAD(P)H-hydrate dehydratas...	1	1	0.04	63	0.04291	0.04291	0.04291
25	GO:0004525	ribonuclease III activity	21	3	0.9	72	0.05887	0.05887	0.05887
26	GO:0003995	acyl-CoA dehydrogenase activity	10	2	0.43	77	0.06583	0.06583	0.06583
27	GO:0016903	oxidoreductase activity, acting on the a...	54	5	2.32	84	0.081	0.081	0.081
28	GO:0004672	protein kinase activity	1031	54	44.24	81	0.07295	0.08271	0.07295
29	GO:0004134	4-alpha-glucanotransferase activity	2	1	0.09	86	0.08398	0.08398	0.08398
30	GO:0004148	dihydrolipoyl dehydrogenase activity	2	1	0.09	87	0.08398	0.08398	0.08398
31	GO:0004615	phosphomannomutase activity	2	1	0.09	88	0.08398	0.08398	0.08398
32	GO:0004657	proline dehydrogenase activity	2	1	0.09	89	0.08398	0.08398	0.08398
33	GO:0008792	arginine decarboxylase activity	2	1	0.09	90	0.08398	0.08398	0.08398
34	GO:0036361	racemase activity, acting on amino acids...	2	1	0.09	91	0.08398	0.08398	0.08398
35	GO:0016757	transferase activity, transferring glyco...	431	28	18.49	50	0.01931	0.09689	0.01931
36	GO:0046961	proton-transporting ATPase activity, rot...	26	3	1.12	100	0.09855	0.09855	0.09855
37	GO:0030246	carbohydrate binding	115	8	4.93	108	0.12115	0.12115	0.12115
38	GO:0003830	beta-1,4-mannosylglycoprotein 4-beta-N-a...	3	1	0.13	109	0.12329	0.12329	0.12329
39	GO:0003906	DNA-(apurinic or apyrimidinic site) endo...	3	1	0.13	110	0.12329	0.12329	0.12329
40	GO:0003997	acyl-CoA oxidase activity	3	1	0.13	111	0.12329	0.12329	0.12329
S. melongena ASI-S-1	GO.ID	MF Term	Annotated	Significant	Expected	Rank in classic	classic	weight	elim
1	GO:0034062	5'-3' RNA polymerase activity	107	20	3.38	3	1.2e-10	1.2e-10	1
2	GO:0032559	adenyl ribonucleotide binding	2153	117	68.04	7	9.6e-10	9.6e-10	0.1547
3	GO:0045156	electron transporter, transferring elect...	37	11	1.17	11	1.1e-08	1.1e-08	1.1e-08
4	GO:0016168	chlorophyll binding	38	11	1.2	13	1.6e-08	1.6e-08	1.6e-08
5	GO:0046933	proton-transporting ATP synthase activit...	29	8	0.92	26	2.2e-06	2.2e-06	2.2e-06
6	GO:0097367	carbohydrate derivative binding	2475	134	78.22	2	4.1e-11	6.1e-05	0.00512
7	GO:0036094	small molecule binding	3082	159	97.4	1	1.2e-11	0.00022	0.00518
8	GO:0046961	proton-transporting ATPase activity, rot...	26	5	0.82	47	0.00117	0.00117	0.00117
9	GO:0019843	rRNA binding	31	5	0.98	52	0.00266	0.00266	0.00266
10	GO:0003995	acyl-CoA dehydrogenase activity	10	3	0.32	53	0.00319	0.00319	0.00319
11	GO:0016651	oxidoreductase activity, acting on NAD(P...	62	9	1.96	37	0.00013	0.00342	0.00013
12	GO:0003989	acetyl-CoA carboxylase activity	12	3	0.38	54	0.00558	0.00558	0.00558
13	GO:0016984	ribulose-bisphosphate carboxylase activi...	12	3	0.38	55	0.00558	0.00558	0.00558
14	GO:0042626	ATPase activity, coupled to transmembran...	89	15	2.81	18	1.1e-07	0.00679	0.00135
15	GO:0008137	NADH dehydrogenase (ubiquinone) activity	29	4	0.92	60	0.0125	0.0125	0.0125
16	GO:0003735	structural constituent of ribosome	415	22	13.12	63	0.01274	0.01274	0.01274
17	GO:0048038	quinone binding	33	4	1.04	72	0.01952	0.01952	0.01952
18	GO:0000287	magnesium ion binding	128	9	4.05	73	0.02029	0.02029	0.02029
19	GO:0004672	protein kinase activity	1031	45	32.58	67	0.01704	0.02102	0.01704
20	GO:0018024	histone-lysine N-methyltransferase activ...	20	3	0.63	75	0.02397	0.02397	0.02397
21	GO:0042301	phosphate ion binding	9	2	0.28	79	0.03097	0.03097	0.03097
22	GO:0036361	racemase activity, acting on amino acids...	2	2	0.06	45	0.001	0.03154	0.001
23	GO:0008381	mechanosensitive ion channel activity	1	1	0.03	81	0.0316	0.0316	0.0316
24	GO:0008762	UDP-N-acetylmuramate dehydrogenase activ...	1	1	0.03	82	0.0316	0.0316	0.0316
25	GO:0008837	diaminopimelate epimerase activity	1	1	0.03	83	0.0316	0.0316	0.0316
26	GO:0003935	GTP cyclohydrolase II activity	2	1	0.06	93	0.06221	0.06221	0.06221
27	GO:0004349	glutamate 5-kinase activity	2	1	0.06	94	0.06221	0.06221	0.06221
28	GO:0004623	phospholipase A2 activity	2	1	0.06	95	0.06221	0.06221	0.06221
29	GO:0017056	structural constituent of nuclear pore	2	1	0.06	96	0.06221	0.06221	0.06221
30	GO:0017176	phosphatidylinositol N-acetylglucosaminy...	2	1	0.06	97	0.06221	0.06221	0.06221
31	GO:0031177	phosphopantetheine binding	2	1	0.06	98	0.06221	0.06221	0.06221
32	GO:0019829	cation-transporting ATPase activity	50	10	1.58	27	3e-06	0.07774	0.07774
33	GO:0008308	voltage-gated anion channel activity	15	2	0.47	103	0.07979	0.07979	0.07979
34	GO:0051539	4 iron, 4 sulfur cluster binding	33	3	1.04	106	0.08516	0.08516	0.08516
35	GO:0003997	acyl-CoA oxidase activity	3	1	0.09	111	0.09185	0.09185	0.09185
36	GO:0004140	dephospho-CoA kinase activity	3	1	0.09	112	0.09185	0.09185	0.09185
37	GO:0004334	fumarylacetoacetase activity	3	1	0.09	113	0.09185	0.09185	0.09185
38	GO:0004556	alpha-amylase activity	3	1	0.09	114	0.09185	0.09185	0.09185
39	GO:0004824	lysine-tRNA ligase activity	3	1	0.09	115	0.09185	0.09185	0.09185
40	GO:0008686	3,4-dihydroxy-2-butanone-4-phosphate syn...	3	1	0.09	116	0.09185	0.09185	0.09185
