# Supplementary material for: Whole-Genome Resequencing of Seven Eggplant (Solanum melongena) and One Wild Relative (S. incanum) Accessions Provides New Insights and Breeding Tools for Eggplant Enhancement
Source: Front Plant Sci. 2019 Oct 8;10:1220. doi: 10.3389/fpls.2019.01220 (PMC6791922; doi:10.3389/fpls.2019.01220)
Supplement: Supplementary file 7 [file DataSheet_7.xlsx]

## Sheet: Supplementary data S7
Supplementary data S7: List of genes with "high" impact variations associated to enriched GO terms. For genes with several terms asssociated (e.g. "DNA repair" and "telomere mainteinance" the most representative term was selected.
SampleName	GeneID	GeneFunction	GOClass	Enriched_GOID	Enriched_GOTerm
S. incanum MM577	SMEL_001g146060.1	Ribulose bisphosphate carboxylase large chain	BP	GO:0015977	carbon fixation
S. incanum MM577	SMEL_002g155400.1	Ribulose bisphosphate carboxylase large chain	BP	GO:0015977	carbon fixation
S. incanum MM577	SMEL_002g162000.1	Ribulose bisphosphate carboxylase large chain	BP	GO:0015977	carbon fixation
S. incanum MM577	SMEL_004g204910.1	Acetyl-coenzyme A carboxylase carboxyl transferase subunit beta, chloroplastic	BP	GO:0015977	carbon fixation
S. incanum MM577	SMEL_005g233370.1	Ribulose bisphosphate carboxylase large chain	BP	GO:0015977	carbon fixation
S. incanum MM577	SMEL_011g378920.1	Ribulose bisphosphate carboxylase large chain	BP	GO:0015977	carbon fixation
S. incanum MM577	SMEL_012g386960.1	Ribulose bisphosphate carboxylase large chain	BP	GO:0015977	carbon fixation
S. incanum MM577	SMEL_012g390480.1	Ribulose bisphosphate carboxylase large chain	BP	GO:0015977	carbon fixation
S. incanum MM577	SMEL_001g140940.1	Photosystem II CP43 reaction center protein	BP	GO:0009772	photosynthetic electron transport in pho...
S. incanum MM577	SMEL_001g144540.1	Photosystem Q(B) protein	BP	GO:0009772	photosynthetic electron transport in pho...
S. incanum MM577	SMEL_002g158360.1	Photosystem II D2 protein	BP	GO:0009772	photosynthetic electron transport in pho...
S. incanum MM577	SMEL_002g159210.1	Ycf2	BP	GO:0009772	photosynthetic electron transport in pho...
S. incanum MM577	SMEL_003g176070.1	Protein VAC14 homolog	BP	GO:0009772	photosynthetic electron transport in pho...
S. incanum MM577	SMEL_003g176830.1	Photosystem II D2 protein	BP	GO:0009772	photosynthetic electron transport in pho...
S. incanum MM577	SMEL_003g177370.1	Photosystem II D2 protein	BP	GO:0009772	photosynthetic electron transport in pho...
S. incanum MM577	SMEL_005g233410.1	Photosystem II D2 protein	BP	GO:0009772	photosynthetic electron transport in pho...
S. incanum MM577	SMEL_007g283120.1	Photosystem II D2 protein	BP	GO:0009772	photosynthetic electron transport in pho...
S. incanum MM577	SMEL_007g284980.1	Photosystem II D2 protein	BP	GO:0009772	photosynthetic electron transport in pho...
S. incanum MM577	SMEL_012g383090.1	Photosystem II D2 protein	BP	GO:0009772	photosynthetic electron transport in pho...
S. incanum MM577	SMEL_012g387760.1	Photosystem Q(B) protein	BP	GO:0009772	photosynthetic electron transport in pho...
S. incanum MM577	SMEL_001g132850.1	Transcription factor IIIB 70 kDa subunit	BP	GO:0006383	transcription by RNA polymerase III
S. incanum MM577	SMEL_001g152330.1	No annotation	BP	GO:0006383	transcription by RNA polymerase III
S. incanum MM577	SMEL_005g226240.1	DNA-directed RNA polymerase III subunit RPC4	BP	GO:0006383	transcription by RNA polymerase III
S. incanum MM577	SMEL_006g256260.1	Transcription factor IIIB 70 kDa subunit	BP	GO:0006383	transcription by RNA polymerase III
S. incanum MM577	SMEL_008g313390.1	DNA-directed RNA polymerase III subunit rpc6	BP	GO:0006383	transcription by RNA polymerase III
S. incanum MM577	SMEL_001g135830.1	Crossover junction endonuclease mus81	BP	GO:0006281	DNA repair
S. incanum MM577	SMEL_001g142370.1	Helitron helicase-like protein	BP	GO:0006281	DNA repair
S. incanum MM577	SMEL_001g143240.1	Helicase-like protein	BP	GO:0006281	DNA repair
S. incanum MM577	SMEL_001g143790.1	Helicase-like protein	BP	GO:0006281	DNA repair
S. incanum MM577	SMEL_001g143840.1	Helicase-like protein	BP	GO:0006281	DNA repair
S. incanum MM577	SMEL_001g145800.1	Unknown protein	BP	GO:0006281	DNA repair
S. incanum MM577	SMEL_001g147730.1	Helicase-like protein	BP	GO:0006281	DNA repair
S. incanum MM577	SMEL_002g154470.1	40S ribosomal protein S19-like	BP	GO:0006281	DNA repair
S. incanum MM577	SMEL_002g158240.1	Helicase-like protein	BP	GO:0006281	DNA repair
S. incanum MM577	SMEL_002g159730.1	UV excision repair protein RAD23	BP	GO:0006281	DNA repair
S. incanum MM577	SMEL_003g171490.1	DNA-(apurinic or apyrimidinic site) lyase 2	BP	GO:0006281	DNA repair
S. incanum MM577	SMEL_003g173980.1	HhH-GPD	BP	GO:0006281	DNA repair
S. incanum MM577	SMEL_003g174670.1	Helicase-like protein	BP	GO:0006281	DNA repair
S. incanum MM577	SMEL_003g174980.1	Helicase-like protein	BP	GO:0006281	DNA repair
S. incanum MM577	SMEL_003g176790.1	Helicase-like protein	BP	GO:0006281	DNA repair
S. incanum MM577	SMEL_003g176970.1	Helicase-like protein	BP	GO:0006281	DNA repair
S. incanum MM577	SMEL_003g177870.1	Helicase-like protein	BP	GO:0006281	DNA repair
S. incanum MM577	SMEL_003g178100.1	Helicase-like protein	BP	GO:0006281	DNA repair
S. incanum MM577	SMEL_003g185440.1	Endonuclease MutS2	BP	GO:0006281	DNA repair
S. incanum MM577	SMEL_003g192340.1	Replication protein A 70 kDa DNA-binding subunit B	BP	GO:0006281	DNA repair
S. incanum MM577	SMEL_004g200320.1	General transcription factor IIH subunit 1	BP	GO:0006281	DNA repair
S. incanum MM577	SMEL_004g205510.1	DNA mismatch repair protein MutS	BP	GO:0006281	DNA repair
S. incanum MM577	SMEL_004g210650.1	Helicase-like protein	BP	GO:0006281	DNA repair
S. incanum MM577	SMEL_004g211440.1	Helicase-like protein	BP	GO:0006281	DNA repair
S. incanum MM577	SMEL_004g213180.1	Helicase-like protein	BP	GO:0006281	DNA repair
S. incanum MM577	SMEL_005g232570.1	Helicase-like protein	BP	GO:0006281	DNA repair
S. incanum MM577	SMEL_006g250240.1	Helicase-like protein	BP	GO:0006281	DNA repair
S. incanum MM577	SMEL_006g265790.1	Structural maintenance of chromosomes protein 3	BP	GO:0006281	DNA repair
S. incanum MM577	SMEL_007g279560.1	Endonuclease III-like protein 1	BP	GO:0006281	DNA repair
S. incanum MM577	SMEL_007g281650.1	Helicase-like protein	BP	GO:0006281	DNA repair
S. incanum MM577	SMEL_007g296460.1	Regulatory protein RecX	BP	GO:0006281	DNA repair
S. incanum MM577	SMEL_007g296940.1	Protein recA	BP	GO:0006281	DNA repair
S. incanum MM577	SMEL_008g312020.1	Cryptochrome 3	BP	GO:0006281	DNA repair
S. incanum MM577	SMEL_008g317550.1	Deoxyribodipyrimidine photo-lyase	BP	GO:0006281	DNA repair
S. incanum MM577	SMEL_009g323520.1	HhH-GPD	BP	GO:0006281	DNA repair
S. incanum MM577	SMEL_009g325630.1	Helicase-like protein	BP	GO:0006281	DNA repair
S. incanum MM577	SMEL_009g325760.1	Helicase-like protein	BP	GO:0006281	DNA repair
S. incanum MM577	SMEL_009g327290.1	Helicase-like protein	BP	GO:0006281	DNA repair
S. incanum MM577	SMEL_010g347280.1	Helicase-like protein	BP	GO:0006281	DNA repair
S. incanum MM577	SMEL_011g372230.1	Helicase-like protein	BP	GO:0006281	DNA repair
S. incanum MM577	SMEL_011g374800.1	Helicase-like protein	BP	GO:0006281	DNA repair
S. incanum MM577	SMEL_005g224440.1	Phosphomannomutase 2	BP	GO:0009298	GDP-mannose biosynthetic process
S. incanum MM577	SMEL_006g255960.1	Mannose-6-phosphate isomerase 1.2	BP	GO:0009298	GDP-mannose biosynthetic process
S. incanum MM577	SMEL_008g303460.1	No annotation	BP	GO:0009298	GDP-mannose biosynthetic process
S. incanum MM577	SMEL_001g115210.1	Dimethylaniline monooxygenase 5	BP	GO:0055114	oxidation-reduction process
S. incanum MM577	SMEL_001g122850.1	No annotation	BP	GO:0055114	oxidation-reduction process
S. incanum MM577	SMEL_001g126390.1	Lipoxygenase	BP	GO:0055114	oxidation-reduction process
S. incanum MM577	SMEL_001g129000.1	No annotation	BP	GO:0055114	oxidation-reduction process
S. incanum MM577	SMEL_001g130360.1	Cytochrome P450	BP	GO:0055114	oxidation-reduction process
S. incanum MM577	SMEL_001g133220.1	CER1	BP	GO:0055114	oxidation-reduction process
S. incanum MM577	SMEL_001g134630.1	Citrate synthase	BP	GO:0055114	oxidation-reduction process
S. incanum MM577	SMEL_001g134870.1	PHD zinc finger-containing protein	BP	GO:0055114	oxidation-reduction process
S. incanum MM577	SMEL_001g134980.1	Carotenoid cleavage dioxygenase 1B	BP	GO:0055114	oxidation-reduction process
S. incanum MM577	SMEL_001g135580.1	Aldehyde oxidase	BP	GO:0055114	oxidation-reduction process
S. incanum MM577	SMEL_001g135800.1	tRNA uridine 5-carboxymethylaminomethyl modification enzyme mnmG	BP	GO:0055114	oxidation-reduction process
S. incanum MM577	SMEL_001g137820.1	Cinnamoyl CoA reductase-like protein-binding domain	BP	GO:0055114	oxidation-reduction process
S. incanum MM577	SMEL_001g140930.1	Peroxisomal fatty acid beta-oxidation multifunctional protein	BP	GO:0055114	oxidation-reduction process
S. incanum MM577	SMEL_001g140940.1	Photosystem II CP43 reaction center protein	BP	GO:0055114	oxidation-reduction process
S. incanum MM577	SMEL_001g143660.1	Aldehyde dehydrogenase-dependent	BP	GO:0055114	oxidation-reduction process
S. incanum MM577	SMEL_001g144540.1	Photosystem Q(B) protein	BP	GO:0055114	oxidation-reduction process
S. incanum MM577	SMEL_001g145450.1	Photosystem II CP43 reaction center protein	BP	GO:0055114	oxidation-reduction process
S. incanum MM577	SMEL_001g145670.1	NADH-ubiquinone oxidoreductase chain 1	BP	GO:0055114	oxidation-reduction process
S. incanum MM577	SMEL_001g146000.1	NAD(P)H-quinone oxidoreductase subunit 1, chloroplastic	BP	GO:0055114	oxidation-reduction process
S. incanum MM577	SMEL_001g146720.1	Cytochrome P450	BP	GO:0055114	oxidation-reduction process
S. incanum MM577	SMEL_001g146910.1	Photosystem II CP47 reaction center protein	BP	GO:0055114	oxidation-reduction process
S. incanum MM577	SMEL_001g148030.1	Cytochrome P450	BP	GO:0055114	oxidation-reduction process
S. incanum MM577	SMEL_001g148430.1	Cytochrome P450	BP	GO:0055114	oxidation-reduction process
S. incanum MM577	SMEL_001g148440.1	Stearoyl-acyl carrier protein desaturase	BP	GO:0055114	oxidation-reduction process
S. incanum MM577	SMEL_001g148750.1	7-dehydrocholesterol reductase	BP	GO:0055114	oxidation-reduction process
S. incanum MM577	SMEL_001g150090.1	Cytochrome P450	BP	GO:0055114	oxidation-reduction process
S. incanum MM577	SMEL_001g150110.1	Cytochrome P450	BP	GO:0055114	oxidation-reduction process
S. incanum MM577	SMEL_001g150140.1	Cytochrome P450	BP	GO:0055114	oxidation-reduction process
S. incanum MM577	SMEL_001g152710.1	Peroxidase	BP	GO:0055114	oxidation-reduction process
S. incanum MM577	SMEL_001g152720.1	Peroxidase	BP	GO:0055114	oxidation-reduction process
S. incanum MM577	SMEL_002g153730.1	3-hydroxy-3-methylglutaryl coenzyme A reductase	BP	GO:0055114	oxidation-reduction process
S. incanum MM577	SMEL_002g154840.1	Cytochrome c oxidase subunit 2	BP	GO:0055114	oxidation-reduction process
S. incanum MM577	SMEL_002g157160.1	Phosphoadenosine phosphosulfate reductase	BP	GO:0055114	oxidation-reduction process
S. incanum MM577	SMEL_002g158360.1	Photosystem II D2 protein	BP	GO:0055114	oxidation-reduction process
S. incanum MM577	SMEL_002g158600.1	Ferredoxin--NADP reductase	BP	GO:0055114	oxidation-reduction process
S. incanum MM577	SMEL_002g159210.1	Ycf2	BP	GO:0055114	oxidation-reduction process
S. incanum MM577	SMEL_002g159820.1	UDP-N-acetylenolpyruvoylglucosamine reductase	BP	GO:0055114	oxidation-reduction process
S. incanum MM577	SMEL_002g161780.1	Cytochrome P450	BP	GO:0055114	oxidation-reduction process
S. incanum MM577	SMEL_002g162230.1	Photosystem II CP47 reaction center protein	BP	GO:0055114	oxidation-reduction process
S. incanum MM577	SMEL_002g163450.1	Pyridine nucleotide-disulfide oxidoreductase	BP	GO:0055114	oxidation-reduction process
S. incanum MM577	SMEL_002g164080.1	Aldehyde dehydrogenase 1	BP	GO:0055114	oxidation-reduction process
S. incanum MM577	SMEL_002g164540.1	Prolyl 4-hydroxylase alpha subunit-like protein	BP	GO:0055114	oxidation-reduction process
S. incanum MM577	SMEL_002g165330.1	Saccharopine dehydrogenase-like oxidoreductase	BP	GO:0055114	oxidation-reduction process
S. incanum MM577	SMEL_002g167370.1	Zeaxanthin epoxidase, chloroplastic	BP	GO:0055114	oxidation-reduction process
S. incanum MM577	SMEL_003g169460.1	Primary amine oxidase	BP	GO:0055114	oxidation-reduction process
S. incanum MM577	SMEL_003g170760.1	FAD-binding domain-containing protein	BP	GO:0055114	oxidation-reduction process
S. incanum MM577	SMEL_003g171370.1	Cytochrome P450	BP	GO:0055114	oxidation-reduction process
S. incanum MM577	SMEL_003g172190.1	Peroxidase	BP	GO:0055114	oxidation-reduction process
S. incanum MM577	SMEL_003g176070.1	Protein VAC14 homolog	BP	GO:0055114	oxidation-reduction process
S. incanum MM577	SMEL_003g176830.1	Photosystem II D2 protein	BP	GO:0055114	oxidation-reduction process
S. incanum MM577	SMEL_003g176960.1	Lipoxygenase	BP	GO:0055114	oxidation-reduction process
S. incanum MM577	SMEL_003g177000.1	9-cis-epoxycarotenoid dioxygenase	BP	GO:0055114	oxidation-reduction process
S. incanum MM577	SMEL_003g177370.1	Photosystem II D2 protein	BP	GO:0055114	oxidation-reduction process
S. incanum MM577	SMEL_003g177970.1	Cytochrome P450	BP	GO:0055114	oxidation-reduction process
S. incanum MM577	SMEL_003g180480.1	Monocopper oxidase-like protein SKU5	BP	GO:0055114	oxidation-reduction process
S. incanum MM577	SMEL_003g183980.1	Glutamate synthase	BP	GO:0055114	oxidation-reduction process
S. incanum MM577	SMEL_003g188860.1	No annotation	BP	GO:0055114	oxidation-reduction process
S. incanum MM577	SMEL_003g189220.1	Cytochrome P450	BP	GO:0055114	oxidation-reduction process
S. incanum MM577	SMEL_003g189270.1	Cytochrome P450 pseudogene	BP	GO:0055114	oxidation-reduction process
S. incanum MM577	SMEL_003g189310.1	Cytochrome P450	BP	GO:0055114	oxidation-reduction process
S. incanum MM577	SMEL_003g194440.1	unknown protein	BP	GO:0055114	oxidation-reduction process
S. incanum MM577	SMEL_003g195990.1	Alpha-dioxygenase 2	BP	GO:0055114	oxidation-reduction process
S. incanum MM577	SMEL_003g196400.1	Cytochrome P450	BP	GO:0055114	oxidation-reduction process
S. incanum MM577	SMEL_003g196410.1	Cytochrome P450	BP	GO:0055114	oxidation-reduction process
S. incanum MM577	SMEL_003g197530.1	Peroxisomal (S)-2-hydroxy-acid oxidase GLO4	BP	GO:0055114	oxidation-reduction process
S. incanum MM577	SMEL_003g197540.1	Peroxisomal (S)-2-hydroxy-acid oxidase GLO4	BP	GO:0055114	oxidation-reduction process
S. incanum MM577	SMEL_003g197550.1	Peroxisomal (S)-2-hydroxy-acid oxidase GLO4	BP	GO:0055114	oxidation-reduction process
S. incanum MM577	SMEL_004g200780.1	No annotation	BP	GO:0055114	oxidation-reduction process
S. incanum MM577	SMEL_004g202790.1	Peroxisomal (S)-2-hydroxy-acid oxidase	BP	GO:0055114	oxidation-reduction process
S. incanum MM577	SMEL_004g203250.1	Cytochrome P450	BP	GO:0055114	oxidation-reduction process
S. incanum MM577	SMEL_004g203380.1	9-divinyl ether synthase	BP	GO:0055114	oxidation-reduction process
S. incanum MM577	SMEL_004g203530.1	Acyl-CoA oxidase 6	BP	GO:0055114	oxidation-reduction process
S. incanum MM577	SMEL_004g209140.1	No annotation	BP	GO:0055114	oxidation-reduction process
S. incanum MM577	SMEL_004g209280.1	NADH dehydrogenase [ubiquinone] iron-sulfur protein 3	BP	GO:0055114	oxidation-reduction process
S. incanum MM577	SMEL_004g211830.1	Cytochrome P450	BP	GO:0055114	oxidation-reduction process
S. incanum MM577	SMEL_004g213210.1	Laccase-13	BP	GO:0055114	oxidation-reduction process
S. incanum MM577	SMEL_004g219020.1	Cytochrome P450	BP	GO:0055114	oxidation-reduction process
S. incanum MM577	SMEL_004g220320.1	Cytochrome P450	BP	GO:0055114	oxidation-reduction process
S. incanum MM577	SMEL_004g220340.1	Cytochrome P450	BP	GO:0055114	oxidation-reduction process
S. incanum MM577	SMEL_004g222230.1	Monocopper oxidase-like protein SKU5	BP	GO:0055114	oxidation-reduction process
S. incanum MM577	SMEL_004g223080.1	Catalase	BP	GO:0055114	oxidation-reduction process
S. incanum MM577	SMEL_005g225210.1	Flavin-monooxygenase	BP	GO:0055114	oxidation-reduction process
S. incanum MM577	SMEL_005g225230.1	Peroxidase	BP	GO:0055114	oxidation-reduction process
S. incanum MM577	SMEL_005g227580.1	Gibberellin 2-oxidase	BP	GO:0055114	oxidation-reduction process
S. incanum MM577	SMEL_005g227970.1	Cytochrome P450	BP	GO:0055114	oxidation-reduction process
S. incanum MM577	SMEL_005g228920.1	Acyl-CoA dehydrogenase	BP	GO:0055114	oxidation-reduction process
S. incanum MM577	SMEL_005g230310.1	Lysine-specific histone demethylase 1	BP	GO:0055114	oxidation-reduction process
S. incanum MM577	SMEL_005g230320.1	Lysine-specific histone demethylase 1	BP	GO:0055114	oxidation-reduction process
S. incanum MM577	SMEL_005g231430.1	Monocopper oxidase-like protein SKU5	BP	GO:0055114	oxidation-reduction process
S. incanum MM577	SMEL_005g231440.1	No annotation	BP	GO:0055114	oxidation-reduction process
S. incanum MM577	SMEL_005g233040.1	Lysine-specific histone demethylase 1	BP	GO:0055114	oxidation-reduction process
S. incanum MM577	SMEL_005g233210.1	No annotation	BP	GO:0055114	oxidation-reduction process
S. incanum MM577	SMEL_005g233240.1	Cytochrome P450	BP	GO:0055114	oxidation-reduction process
S. incanum MM577	SMEL_005g233410.1	Photosystem II D2 protein	BP	GO:0055114	oxidation-reduction process
S. incanum MM577	SMEL_005g234910.1	Cytochrome P450	BP	GO:0055114	oxidation-reduction process
S. incanum MM577	SMEL_005g235170.1	Laccase	BP	GO:0055114	oxidation-reduction process
S. incanum MM577	SMEL_005g236570.1	Cytochrome P450	BP	GO:0055114	oxidation-reduction process
S. incanum MM577	SMEL_005g238070.1	Monocopper oxidase-like protein SKU5	BP	GO:0055114	oxidation-reduction process
S. incanum MM577	SMEL_005g240570.1	No annotation	BP	GO:0055114	oxidation-reduction process
S. incanum MM577	SMEL_005g241870.1	2-oxoglutarate-dependent dioxygenase	BP	GO:0055114	oxidation-reduction process
S. incanum MM577	SMEL_006g242670.1	Peroxisomal fatty acid beta-oxidation multifunctional protein	BP	GO:0055114	oxidation-reduction process
S. incanum MM577	SMEL_006g248260.1	2-oxoglutarate-dependent dioxygenase	BP	GO:0055114	oxidation-reduction process
S. incanum MM577	SMEL_006g251790.1	Cytochrome P450	BP	GO:0055114	oxidation-reduction process
S. incanum MM577	SMEL_006g258510.1	NAD(P)H-quinone oxidoreductase subunit H, chloroplastic	BP	GO:0055114	oxidation-reduction process
S. incanum MM577	SMEL_006g259050.1	Cytochrome P450	BP	GO:0055114	oxidation-reduction process
S. incanum MM577	SMEL_006g259060.1	Cytochrome P450	BP	GO:0055114	oxidation-reduction process
S. incanum MM577	SMEL_006g263020.1	Aldehyde dehydrogenase	BP	GO:0055114	oxidation-reduction process
S. incanum MM577	SMEL_006g265960.1	NAD(P)H-quinone oxidoreductase subunit I chloroplastic	BP	GO:0055114	oxidation-reduction process
S. incanum MM577	SMEL_006g267880.1	Cytochrome P450	BP	GO:0055114	oxidation-reduction process
S. incanum MM577	SMEL_006g268950.1	Peroxidase 3	BP	GO:0055114	oxidation-reduction process
S. incanum MM577	SMEL_006g269680.1	Cytochrome P450	BP	GO:0055114	oxidation-reduction process
S. incanum MM577	SMEL_006g269690.1	Cytochrome P450	BP	GO:0055114	oxidation-reduction process
S. incanum MM577	SMEL_006g270300.1	No annotation	BP	GO:0055114	oxidation-reduction process
S. incanum MM577	SMEL_007g277510.1	Cytochrome P450 NADPH-reductase	BP	GO:0055114	oxidation-reduction process
S. incanum MM577	SMEL_007g278740.1	Cytochrome P450	BP	GO:0055114	oxidation-reduction process
S. incanum MM577	SMEL_007g279450.1	cytochrome P450	BP	GO:0055114	oxidation-reduction process
S. incanum MM577	SMEL_007g281380.1	NADH-ubiquinone oxidoreductase chain 1	BP	GO:0055114	oxidation-reduction process
S. incanum MM577	SMEL_007g281500.1	Polyamine oxidase	BP	GO:0055114	oxidation-reduction process
S. incanum MM577	SMEL_007g283120.1	Photosystem II D2 protein	BP	GO:0055114	oxidation-reduction process
S. incanum MM577	SMEL_007g283690.1	Cytochrome c oxidase subunit 1	BP	GO:0055114	oxidation-reduction process
S. incanum MM577	SMEL_007g284980.1	Photosystem II D2 protein	BP	GO:0055114	oxidation-reduction process
S. incanum MM577	SMEL_007g285330.1	No annotation	BP	GO:0055114	oxidation-reduction process
S. incanum MM577	SMEL_007g285410.1	No annotation	BP	GO:0055114	oxidation-reduction process
S. incanum MM577	SMEL_007g285960.1	4-hydroxyphenylpyruvate dioxygenase	BP	GO:0055114	oxidation-reduction process
S. incanum MM577	SMEL_007g286030.1	No annotation	BP	GO:0055114	oxidation-reduction process
S. incanum MM577	SMEL_007g287930.1	Lysine-specific histone demethylase	BP	GO:0055114	oxidation-reduction process
S. incanum MM577	SMEL_007g291440.1	Cytochrome P450	BP	GO:0055114	oxidation-reduction process
S. incanum MM577	SMEL_007g291630.1	Cytochrome P450	BP	GO:0055114	oxidation-reduction process
S. incanum MM577	SMEL_007g293240.1	Cytochrome c-type biogenesis ccda-like chloroplastic protein 2	BP	GO:0055114	oxidation-reduction process
S. incanum MM577	SMEL_007g293320.1	Lysine-specific histone demethylase	BP	GO:0055114	oxidation-reduction process
S. incanum MM577	SMEL_007g294370.1	Cytochrome P450	BP	GO:0055114	oxidation-reduction process
S. incanum MM577	SMEL_008g297560.1	Cytochrome P450	BP	GO:0055114	oxidation-reduction process
S. incanum MM577	SMEL_008g299650.1	Alternative oxidase	BP	GO:0055114	oxidation-reduction process
S. incanum MM577	SMEL_008g301690.1	NAD-dependent malic enzyme 2	BP	GO:0055114	oxidation-reduction process
S. incanum MM577	SMEL_008g301780.1	Peroxidase family protein	BP	GO:0055114	oxidation-reduction process
S. incanum MM577	SMEL_008g302640.1	Cytochrome P450 ent-kaurenoic acid oxidase	BP	GO:0055114	oxidation-reduction process
S. incanum MM577	SMEL_008g304370.1	Peroxisomal (S)-2-hydroxy-acid oxidase	BP	GO:0055114	oxidation-reduction process
S. incanum MM577	SMEL_008g304650.1	No annotation	BP	GO:0055114	oxidation-reduction process
S. incanum MM577	SMEL_008g305560.1	Cytochrome P450	BP	GO:0055114	oxidation-reduction process
S. incanum MM577	SMEL_008g306170.1	No annotation	BP	GO:0055114	oxidation-reduction process
S. incanum MM577	SMEL_008g308280.1	9-cis-epoxycarotenoid dioxygenase 5	BP	GO:0055114	oxidation-reduction process
S. incanum MM577	SMEL_008g311200.1	No annotation	BP	GO:0055114	oxidation-reduction process
S. incanum MM577	SMEL_008g312430.1	Polyphenol oxidase	BP	GO:0055114	oxidation-reduction process
S. incanum MM577	SMEL_008g313820.1	Primary amine oxidase	BP	GO:0055114	oxidation-reduction process
S. incanum MM577	SMEL_008g315450.1	Delta(24)-sterol reductase	BP	GO:0055114	oxidation-reduction process
S. incanum MM577	SMEL_008g315610.1	No annotation	BP	GO:0055114	oxidation-reduction process
S. incanum MM577	SMEL_008g317370.1	Cytochrome P450	BP	GO:0055114	oxidation-reduction process
S. incanum MM577	SMEL_008g317380.1	Cytochrome P450	BP	GO:0055114	oxidation-reduction process
S. incanum MM577	SMEL_008g317390.1	cytochrome P450	BP	GO:0055114	oxidation-reduction process
S. incanum MM577	SMEL_008g318020.1	No annotation	BP	GO:0055114	oxidation-reduction process
S. incanum MM577	SMEL_008g318480.1	Cytochrome P450	BP	GO:0055114	oxidation-reduction process
S. incanum MM577	SMEL_009g320240.1	Delta(14)-sterol reductase	BP	GO:0055114	oxidation-reduction process
S. incanum MM577	SMEL_009g321610.1	No annotation	BP	GO:0055114	oxidation-reduction process
S. incanum MM577	SMEL_009g322240.1	Ascorbate peroxidase	BP	GO:0055114	oxidation-reduction process
S. incanum MM577	SMEL_009g325570.1	Photosystem II CP43 reaction center protein	BP	GO:0055114	oxidation-reduction process
S. incanum MM577	SMEL_009g330770.1	Lipoxygenase	BP	GO:0055114	oxidation-reduction process
S. incanum MM577	SMEL_009g332800.1	Primary amine oxidase	BP	GO:0055114	oxidation-reduction process
S. incanum MM577	SMEL_009g332840.1	Alpha-dioxygenase	BP	GO:0055114	oxidation-reduction process
S. incanum MM577	SMEL_009g332870.1	Cyclopropane-fatty-acyl-phospholipid synthase	BP	GO:0055114	oxidation-reduction process
S. incanum MM577	SMEL_009g333780.1	7-hydroxymethyl chlorophyll a reductase, chloroplastic	BP	GO:0055114	oxidation-reduction process
S. incanum MM577	SMEL_009g333830.1	Ubiquinone biosynthesis monooxygenase COQ6, mitochondrial	BP	GO:0055114	oxidation-reduction process
S. incanum MM577	SMEL_009g334730.1	Cytochrome P450	BP	GO:0055114	oxidation-reduction process
S. incanum MM577	SMEL_009g335090.1	Cytochrome P450	BP	GO:0055114	oxidation-reduction process
S. incanum MM577	SMEL_009g335100.1	Cytochrome P450	BP	GO:0055114	oxidation-reduction process
S. incanum MM577	SMEL_009g335120.1	Cytochrome P450	BP	GO:0055114	oxidation-reduction process
S. incanum MM577	SMEL_009g335460.1	No annotation	BP	GO:0055114	oxidation-reduction process
S. incanum MM577	SMEL_009g335800.1	Cytochrome P450	BP	GO:0055114	oxidation-reduction process
S. incanum MM577	SMEL_010g338150.1	Gibberellin 20-oxidase-like protein	BP	GO:0055114	oxidation-reduction process
S. incanum MM577	SMEL_010g339320.1	Peroxidase 27	BP	GO:0055114	oxidation-reduction process
S. incanum MM577	SMEL_010g339330.1	Peroxidase 27	BP	GO:0055114	oxidation-reduction process
S. incanum MM577	SMEL_010g340120.1	No annotation	BP	GO:0055114	oxidation-reduction process
S. incanum MM577	SMEL_010g341010.1	Peroxidase 27	BP	GO:0055114	oxidation-reduction process
S. incanum MM577	SMEL_010g343610.1	NAD(P)H-quinone oxidoreductase subunit 5, chloroplastic	BP	GO:0055114	oxidation-reduction process
S. incanum MM577	SMEL_010g344510.1	3-beta-hydroxysteroid dehydrogenase-like	BP	GO:0055114	oxidation-reduction process
S. incanum MM577	SMEL_010g344710.1	Cytochrome P450	BP	GO:0055114	oxidation-reduction process
S. incanum MM577	SMEL_010g345370.1	Pyridine nucleotide-disulfide oxidoreductase family protein	BP	GO:0055114	oxidation-reduction process
S. incanum MM577	SMEL_010g345500.1	Photosystem II CP43 reaction center protein	BP	GO:0055114	oxidation-reduction process
S. incanum MM577	SMEL_010g348830.1	No annotation	BP	GO:0055114	oxidation-reduction process
S. incanum MM577	SMEL_010g352320.1	No annotation	BP	GO:0055114	oxidation-reduction process
S. incanum MM577	SMEL_010g352640.1	Acyl-CoA dehydrogenase	BP	GO:0055114	oxidation-reduction process
S. incanum MM577	SMEL_010g356990.1	2-oxoglutarate-dependent dioxygenase	BP	GO:0055114	oxidation-reduction process
S. incanum MM577	SMEL_010g357980.1	2-Cys peroxiredoxin BAS1-like, chloroplastic	BP	GO:0055114	oxidation-reduction process
S. incanum MM577	SMEL_010g358560.1	Cytochrome P450	BP	GO:0055114	oxidation-reduction process
S. incanum MM577	SMEL_010g359140.1	Peroxidase	BP	GO:0055114	oxidation-reduction process
S. incanum MM577	SMEL_010g360200.1	Cytokinin dehydrogenase 1	BP	GO:0055114	oxidation-reduction process
S. incanum MM577	SMEL_010g361080.1	cytochrome P450	BP	GO:0055114	oxidation-reduction process
S. incanum MM577	SMEL_010g361100.1	Cytochrome P450	BP	GO:0055114	oxidation-reduction process
S. incanum MM577	SMEL_011g362270.1	Isocitrate dehydrogenase	BP	GO:0055114	oxidation-reduction process
S. incanum MM577	SMEL_011g363910.1	Alcohol dehydrogenase	BP	GO:0055114	oxidation-reduction process
S. incanum MM577	SMEL_011g365580.1	Lysine-specific histone demethylase 1	BP	GO:0055114	oxidation-reduction process
S. incanum MM577	SMEL_011g365870.1	Cytochrome P450	BP	GO:0055114	oxidation-reduction process
S. incanum MM577	SMEL_011g366360.1	Cytochrome P450	BP	GO:0055114	oxidation-reduction process
S. incanum MM577	SMEL_011g368510.1	Cytochrome P450	BP	GO:0055114	oxidation-reduction process
S. incanum MM577	SMEL_011g368540.1	Cytochrome P450	BP	GO:0055114	oxidation-reduction process
S. incanum MM577	SMEL_011g368970.1	Cytochrome P450	BP	GO:0055114	oxidation-reduction process
S. incanum MM577	SMEL_011g369490.1	Lipoxygenase	BP	GO:0055114	oxidation-reduction process
S. incanum MM577	SMEL_011g373970.1	Reductase 2	BP	GO:0055114	oxidation-reduction process
S. incanum MM577	SMEL_011g375060.1	Peroxidase 2	BP	GO:0055114	oxidation-reduction process
S. incanum MM577	SMEL_011g377810.1	Pheophorbide a oxygenase	BP	GO:0055114	oxidation-reduction process
S. incanum MM577	SMEL_012g380230.1	Lycopene epsilon cyclase, chloroplastic	BP	GO:0055114	oxidation-reduction process
S. incanum MM577	SMEL_012g383090.1	Photosystem II D2 protein	BP	GO:0055114	oxidation-reduction process
S. incanum MM577	SMEL_012g384820.1	NAD(P)H-quinone oxidoreductase subunit J, chloroplastic	BP	GO:0055114	oxidation-reduction process
S. incanum MM577	SMEL_012g385590.1	Primary amine oxidase	BP	GO:0055114	oxidation-reduction process
S. incanum MM577	SMEL_012g386810.1	Prolycopene isomerase, chloroplastic	BP	GO:0055114	oxidation-reduction process
S. incanum MM577	SMEL_012g387760.1	Photosystem Q(B) protein	BP	GO:0055114	oxidation-reduction process
S. incanum MM577	SMEL_012g387820.1	No annotation	BP	GO:0055114	oxidation-reduction process
S. incanum MM577	SMEL_012g389660.1	No annotation	BP	GO:0055114	oxidation-reduction process
S. incanum MM577	SMEL_012g389830.1	No annotation	BP	GO:0055114	oxidation-reduction process
S. incanum MM577	SMEL_012g391170.1	Cytochrome P450	BP	GO:0055114	oxidation-reduction process
S. incanum MM577	SMEL_012g392500.1	Cytochrome P450	BP	GO:0055114	oxidation-reduction process
S. incanum MM577	SMEL_012g394820.1	No annotation	BP	GO:0055114	oxidation-reduction process
S. incanum MM577	SMEL_012g395730.1	Aldehyde oxidase	BP	GO:0055114	oxidation-reduction process
S. incanum MM577	SMEL_012g398680.1	Carotenoid cleavage dioxygenase	BP	GO:0055114	oxidation-reduction process
S. incanum MM577	SMEL_012g398740.1	Alcohol dehydrogenase	BP	GO:0055114	oxidation-reduction process
S. incanum MM577	SMEL_003g176070.1	Protein VAC14 homolog	BP	GO:0043549	regulation of kinase activity
S. incanum MM577	SMEL_004g203630.1	Targeting protein for Xklp2 containing protein expressed	BP	GO:0043549	regulation of kinase activity
S. incanum MM577	SMEL_009g326680.1	Cyclin-dependent kinase	BP	GO:0043549	regulation of kinase activity
S. incanum MM577	SMEL_011g374590.1	Protein VAC14 homolog	BP	GO:0043549	regulation of kinase activity
S. incanum MM577	SMEL_003g181680.1	Cleavage and polyadenylation specificity factor subunit 2	BP	GO:0006379	mRNA cleavage
S. incanum MM577	SMEL_009g322130.1	Ribonuclease P protein subunit p29	BP	GO:0006379	mRNA cleavage
S. incanum MM577	SMEL_001g124650.1	Ribosomal RNA small subunit methyltransferase A	BP	GO:0000154	rRNA modification
S. incanum MM577	SMEL_008g300480.1	Ribosomal RNA large subunit methyltransferase J family protein	BP	GO:0000154	rRNA modification
S. incanum MM577	SMEL_011g363850.1	Ribosomal RNA large subunit methyltransferase J family protein	BP	GO:0000154	rRNA modification
S. incanum MM577	SMEL_001g116630.1	Ribosome-binding factor A	BP	GO:0034470	ncRNA processing
S. incanum MM577	SMEL_001g122450.1	Ribosome biogenesis protein BOP1 homolog	BP	GO:0034470	ncRNA processing
S. incanum MM577	SMEL_001g124650.1	Ribosomal RNA small subunit methyltransferase A	BP	GO:0034470	ncRNA processing
S. incanum MM577	SMEL_001g134870.1	PHD zinc finger-containing protein	BP	GO:0034470	ncRNA processing
S. incanum MM577	SMEL_001g135800.1	tRNA uridine 5-carboxymethylaminomethyl modification enzyme mnmG	BP	GO:0034470	ncRNA processing
S. incanum MM577	SMEL_001g136690.1	tRNA:m(4)X modification enzyme TRM13 homolog	BP	GO:0034470	ncRNA processing
S. incanum MM577	SMEL_002g161100.1	Integrator complex subunit 7	BP	GO:0034470	ncRNA processing
S. incanum MM577	SMEL_003g180090.1	UPF0406 protein C16orf57 homolog	BP	GO:0034470	ncRNA processing
S. incanum MM577	SMEL_003g182890.1	rRNA 2'-O-methyltransferase fibrillarin	BP	GO:0034470	ncRNA processing
S. incanum MM577	SMEL_004g211840.1	tRNA (Adenine-N(1)-)-methyltransferase non-catalytic subunit trm6	BP	GO:0034470	ncRNA processing
S. incanum MM577	SMEL_004g215550.1	tRNA modification GTPase mnmE	BP	GO:0034470	ncRNA processing
S. incanum MM577	SMEL_005g234350.1	RNA cytidine acetyltransferase 1	BP	GO:0034470	ncRNA processing
S. incanum MM577	SMEL_006g270090.1	tRNA (Guanine-N(1)-)-methyltransferase	BP	GO:0034470	ncRNA processing
S. incanum MM577	SMEL_008g300480.1	Ribosomal RNA large subunit methyltransferase J family protein	BP	GO:0034470	ncRNA processing
S. incanum MM577	SMEL_008g308000.1	tRNA-specific adenosine deaminase	BP	GO:0034470	ncRNA processing
S. incanum MM577	SMEL_009g322130.1	Ribonuclease P protein subunit p29	BP	GO:0034470	ncRNA processing
S. incanum MM577	SMEL_009g331990.1	Genomic DNA chromosome 5 P1 clone MQD19	BP	GO:0034470	ncRNA processing
S. incanum MM577	SMEL_011g363850.1	Ribosomal RNA large subunit methyltransferase J family protein	BP	GO:0034470	ncRNA processing
S. incanum MM577	SMEL_011g370870.1	No annotation	BP	GO:0034470	ncRNA processing
S. incanum MM577	SMEL_012g397160.1	tRNA(Ile)-lysidine synthase	BP	GO:0034470	ncRNA processing
S. incanum MM577	SMEL_004g211840.1	tRNA (Adenine-N(1)-)-methyltransferase non-catalytic subunit trm6	BP	GO:0001510	RNA methylation
S. incanum MM577	SMEL_006g244290.1	tRNA (guanine-N(7)-)-methyltransferase non-catalytic subunit wdr4	BP	GO:0001510	RNA methylation
S. incanum MM577	SMEL_006g270090.1	tRNA (Guanine-N(1)-)-methyltransferase	BP	GO:0001510	RNA methylation
S. incanum MM577	SMEL_008g300480.1	Ribosomal RNA large subunit methyltransferase J family protein	BP	GO:0001510	RNA methylation
S. incanum MM577	SMEL_011g363850.1	Ribosomal RNA large subunit methyltransferase J family protein	BP	GO:0001510	RNA methylation
S. incanum MM577	SMEL_002g155410.1	ATP synthase subunit beta chloroplastic	BP	GO:0015991	ATP hydrolysis coupled proton transport
S. incanum MM577	SMEL_002g157390.1	ATP synthase subunit alpha, chloroplastic	BP	GO:0015991	ATP hydrolysis coupled proton transport
S. incanum MM577	SMEL_003g187100.1	ATP synthase subunit beta chloroplastic	BP	GO:0015991	ATP hydrolysis coupled proton transport
S. incanum MM577	SMEL_004g208990.1	ATP synthase subunit alpha, chloroplastic	BP	GO:0015991	ATP hydrolysis coupled proton transport
S. incanum MM577	SMEL_004g221660.1	ATP synthase subunit alpha, chloroplastic	BP	GO:0015991	ATP hydrolysis coupled proton transport
S. incanum MM577	SMEL_005g231290.1	ATP synthase subunit alpha, chloroplastic	BP	GO:0015991	ATP hydrolysis coupled proton transport
S. incanum MM577	SMEL_005g234630.1	V-type proton ATPase catalytic subunit A	BP	GO:0015991	ATP hydrolysis coupled proton transport
S. incanum MM577	SMEL_007g271760.1	V-type proton ATPase subunit H	BP	GO:0015991	ATP hydrolysis coupled proton transport
S. incanum MM577	SMEL_007g275800.1	ATP synthase subunit beta chloroplastic	BP	GO:0015991	ATP hydrolysis coupled proton transport
S. incanum MM577	SMEL_007g289680.1	ATP synthase subunit beta chloroplastic	BP	GO:0015991	ATP hydrolysis coupled proton transport
S. incanum MM577	SMEL_008g302960.1	ATP synthase subunit alpha, mitochondrial	BP	GO:0015991	ATP hydrolysis coupled proton transport
S. incanum MM577	SMEL_010g343050.1	ATP synthase subunit beta chloroplastic	BP	GO:0015991	ATP hydrolysis coupled proton transport
S. incanum MM577	SMEL_011g369640.1	ATP synthase subunit alpha, chloroplastic	BP	GO:0015991	ATP hydrolysis coupled proton transport
S. incanum MM577	SMEL_011g372120.1	ATP synthase subunit beta chloroplastic	BP	GO:0015991	ATP hydrolysis coupled proton transport
S. incanum MM577	SMEL_001g115890.1	Proteasome subunit alpha type	BP	GO:0006511	ubiquitin-dependent protein catabolic pr...
S. incanum MM577	SMEL_002g159730.1	UV excision repair protein RAD23	BP	GO:0006511	ubiquitin-dependent protein catabolic pr...
S. incanum MM577	SMEL_003g172870.1	E3 ubiquitin-protein ligase sina	BP	GO:0006511	ubiquitin-dependent protein catabolic pr...
S. incanum MM577	SMEL_003g181120.1	SKP1-like protein 4	BP	GO:0006511	ubiquitin-dependent protein catabolic pr...
S. incanum MM577	SMEL_004g208570.1	No annotation	BP	GO:0006511	ubiquitin-dependent protein catabolic pr...
S. incanum MM577	SMEL_004g217010.1	Ubiquitin carboxyl-terminal hydrolase family protein	BP	GO:0006511	ubiquitin-dependent protein catabolic pr...
S. incanum MM577	SMEL_005g224870.1	E3 ubiquitin-protein ligase sina	BP	GO:0006511	ubiquitin-dependent protein catabolic pr...
S. incanum MM577	SMEL_005g228160.1	Ubiquitin carboxyl-terminal hydrolase	BP	GO:0006511	ubiquitin-dependent protein catabolic pr...
S. incanum MM577	SMEL_005g232820.1	Proteasome subunit alpha type	BP	GO:0006511	ubiquitin-dependent protein catabolic pr...
S. incanum MM577	SMEL_005g239830.1	Ubiquitin carboxyl-terminal hydrolase family protein	BP	GO:0006511	ubiquitin-dependent protein catabolic pr...
S. incanum MM577	SMEL_006g250990.1	E3 ubiquitin-protein ligase sina	BP	GO:0006511	ubiquitin-dependent protein catabolic pr...
S. incanum MM577	SMEL_007g291130.1	Proteasome subunit alpha type	BP	GO:0006511	ubiquitin-dependent protein catabolic pr...
S. incanum MM577	SMEL_008g301980.1	Ubiquitin carboxyl-terminal hydrolase	BP	GO:0006511	ubiquitin-dependent protein catabolic pr...
S. incanum MM577	SMEL_008g315540.1	Ubiquitin carboxyl-terminal hydrolase isozyme L3	BP	GO:0006511	ubiquitin-dependent protein catabolic pr...
S. incanum MM577	SMEL_010g345650.1	SKP1	BP	GO:0006511	ubiquitin-dependent protein catabolic pr...
S. incanum MM577	SMEL_010g361860.1	Ubiquitin carboxyl-terminal hydrolase family protein expressed	BP	GO:0006511	ubiquitin-dependent protein catabolic pr...
S. incanum MM577	SMEL_012g395630.1	Ubiquitin carboxyl-terminal hydrolase family protein expressed	BP	GO:0006511	ubiquitin-dependent protein catabolic pr...
S. incanum MM577	SMEL_006g261320.1	Proline--tRNA ligase	BP	GO:0006433	prolyl-tRNA aminoacylation
S. incanum MM577	SMEL_006g261380.1	Proline--tRNA ligase	BP	GO:0006433	prolyl-tRNA aminoacylation
S. incanum MM577	SMEL_001g143490.1	No annotation	BP	GO:0031123	RNA 3'-end processing
S. incanum MM577	SMEL_001g148710.1	No annotation	BP	GO:0031123	RNA 3'-end processing
S. incanum MM577	SMEL_003g180090.1	UPF0406 protein C16orf57 homolog	BP	GO:0031123	RNA 3'-end processing
S. incanum MM577	SMEL_003g181680.1	Cleavage and polyadenylation specificity factor subunit 2	BP	GO:0031123	RNA 3'-end processing
S. incanum MM577	SMEL_003g182010.1	Cleavage and polyadenylation specificity factor subunit 5	BP	GO:0031123	RNA 3'-end processing
S. incanum MM577	SMEL_006g259790.1	Poly(A) polymerase polymerase	BP	GO:0031123	RNA 3'-end processing
S. incanum MM577	SMEL_001g119160.1	Kynurenine formamidase	BP	GO:0009308	amine metabolic process
S. incanum MM577	SMEL_001g148370.1	S-adenosylmethionine decarboxylase proenzyme	BP	GO:0009308	amine metabolic process
S. incanum MM577	SMEL_003g169460.1	Primary amine oxidase	BP	GO:0009308	amine metabolic process
S. incanum MM577	SMEL_004g205610.1	Tryptophan synthase beta chain 1	BP	GO:0009308	amine metabolic process
S. incanum MM577	SMEL_008g313820.1	Primary amine oxidase	BP	GO:0009308	amine metabolic process
S. incanum MM577	SMEL_009g332800.1	Primary amine oxidase	BP	GO:0009308	amine metabolic process
S. incanum MM577	SMEL_010g360200.1	Cytokinin dehydrogenase 1	BP	GO:0009308	amine metabolic process
S. incanum MM577	SMEL_012g383800.1	Arginine decarboxylase	BP	GO:0009308	amine metabolic process
S. incanum MM577	SMEL_012g385590.1	Primary amine oxidase	BP	GO:0009308	amine metabolic process
S. incanum MM577	SMEL_003g183980.1	Glutamate synthase	BP	GO:0009084	glutamine family amino acid biosynthetic...
S. incanum MM577	SMEL_010g357130.1	Glutamine synthetase I	BP	GO:0009084	glutamine family amino acid biosynthetic...
S. incanum MM577	SMEL_011g378860.1	Glutamine synthetase	BP	GO:0009084	glutamine family amino acid biosynthetic...
S. incanum MM577	SMEL_012g389650.1	No annotation	BP	GO:0009084	glutamine family amino acid biosynthetic...
S. incanum MM577	SMEL_012g389660.1	No annotation	BP	GO:0009084	glutamine family amino acid biosynthetic...
S. incanum MM577	SMEL_002g155410.1	ATP synthase subunit beta chloroplastic	CC	GO:0033178	proton-transporting two-sector ATPase co...
S. incanum MM577	SMEL_002g157390.1	ATP synthase subunit alpha, chloroplastic	CC	GO:0033178	proton-transporting two-sector ATPase co...
S. incanum MM577	SMEL_003g187100.1	ATP synthase subunit beta chloroplastic	CC	GO:0033178	proton-transporting two-sector ATPase co...
S. incanum MM577	SMEL_003g192390.1	No annotation	CC	GO:0033178	proton-transporting two-sector ATPase co...
S. incanum MM577	SMEL_004g208990.1	ATP synthase subunit alpha, chloroplastic	CC	GO:0033178	proton-transporting two-sector ATPase co...
S. incanum MM577	SMEL_004g221660.1	ATP synthase subunit alpha, chloroplastic	CC	GO:0033178	proton-transporting two-sector ATPase co...
S. incanum MM577	SMEL_005g231290.1	ATP synthase subunit alpha, chloroplastic	CC	GO:0033178	proton-transporting two-sector ATPase co...
S. incanum MM577	SMEL_005g234630.1	V-type proton ATPase catalytic subunit A	CC	GO:0033178	proton-transporting two-sector ATPase co...
S. incanum MM577	SMEL_007g271760.1	V-type proton ATPase subunit H	CC	GO:0033178	proton-transporting two-sector ATPase co...
S. incanum MM577	SMEL_007g275800.1	ATP synthase subunit beta chloroplastic	CC	GO:0033178	proton-transporting two-sector ATPase co...
S. incanum MM577	SMEL_007g289680.1	ATP synthase subunit beta chloroplastic	CC	GO:0033178	proton-transporting two-sector ATPase co...
S. incanum MM577	SMEL_008g302960.1	ATP synthase subunit alpha, mitochondrial	CC	GO:0033178	proton-transporting two-sector ATPase co...
S. incanum MM577	SMEL_010g343050.1	ATP synthase subunit beta chloroplastic	CC	GO:0033178	proton-transporting two-sector ATPase co...
S. incanum MM577	SMEL_011g369640.1	ATP synthase subunit alpha, chloroplastic	CC	GO:0033178	proton-transporting two-sector ATPase co...
S. incanum MM577	SMEL_011g372120.1	ATP synthase subunit beta chloroplastic	CC	GO:0033178	proton-transporting two-sector ATPase co...
S. incanum MM577	SMEL_001g132850.1	Transcription factor IIIB 70 kDa subunit	CC	GO:0000126	transcription factor TFIIIB complex
S. incanum MM577	SMEL_001g152330.1	No annotation	CC	GO:0000126	transcription factor TFIIIB complex
S. incanum MM577	SMEL_006g256260.1	Transcription factor IIIB 70 kDa subunit	CC	GO:0000126	transcription factor TFIIIB complex
S. incanum MM577	SMEL_001g135000.1	Nuclear transcription factor Y subunit A-1	CC	GO:0090575	RNA polymerase II transcription factor c...
S. incanum MM577	SMEL_004g200320.1	General transcription factor IIH subunit 1	CC	GO:0090575	RNA polymerase II transcription factor c...
S. incanum MM577	SMEL_004g217420.1	Transcription initiation factor TFIID subunit 7	CC	GO:0090575	RNA polymerase II transcription factor c...
S. incanum MM577	SMEL_006g260370.1	Transcription initiation factor TFIID subunit 12	CC	GO:0090575	RNA polymerase II transcription factor c...
S. incanum MM577	SMEL_006g260380.1	Transcription initiation factor TFIID subunit 12	CC	GO:0090575	RNA polymerase II transcription factor c...
S. incanum MM577	SMEL_006g268080.1	No annotation	CC	GO:0090575	RNA polymerase II transcription factor c...
S. incanum MM577	SMEL_007g284420.1	DNA-directed RNA polymerase subunit beta	CC	GO:0090575	RNA polymerase II transcription factor c...
S. incanum MM577	SMEL_003g176070.1	Protein VAC14 homolog	CC	GO:0070772	PAS complex
S. incanum MM577	SMEL_011g374590.1	Protein VAC14 homolog	CC	GO:0070772	PAS complex
S. incanum MM577	SMEL_005g226240.1	DNA-directed RNA polymerase III subunit RPC4	CC	GO:0005666	RNA polymerase III complex
S. incanum MM577	SMEL_008g313390.1	DNA-directed RNA polymerase III subunit rpc6	CC	GO:0005666	RNA polymerase III complex
S. incanum MM577	SMEL_001g139450.1	Ribonuclease H	MF	GO:0016893	endonuclease activity, active with eithe...
S. incanum MM577	SMEL_001g147540.1	Endoribonuclease Dicer homolog 2	MF	GO:0016893	endonuclease activity, active with eithe...
S. incanum MM577	SMEL_002g156030.1	Ribonuclease H	MF	GO:0016893	endonuclease activity, active with eithe...
S. incanum MM577	SMEL_002g160240.1	Ribonuclease H	MF	GO:0016893	endonuclease activity, active with eithe...
S. incanum MM577	SMEL_004g208450.1	Ribonuclease H	MF	GO:0016893	endonuclease activity, active with eithe...
S. incanum MM577	SMEL_005g225600.1	Ribonuclease 3-like protein 3	MF	GO:0016893	endonuclease activity, active with eithe...
S. incanum MM577	SMEL_006g248020.1	Ribonuclease H	MF	GO:0016893	endonuclease activity, active with eithe...
S. incanum MM577	SMEL_006g252400.1	Ribonuclease H	MF	GO:0016893	endonuclease activity, active with eithe...
S. incanum MM577	SMEL_007g278760.1	Endoribonuclease Dicer homolog 2	MF	GO:0016893	endonuclease activity, active with eithe...
S. incanum MM577	SMEL_008g303010.1	Ribonuclease H	MF	GO:0016893	endonuclease activity, active with eithe...
S. incanum MM577	SMEL_008g309410.1	Ribonuclease H	MF	GO:0016893	endonuclease activity, active with eithe...
S. incanum MM577	SMEL_008g313020.1	Replication-associated protein	MF	GO:0016893	endonuclease activity, active with eithe...
S. incanum MM577	SMEL_009g328980.1	Ribonuclease H	MF	GO:0016893	endonuclease activity, active with eithe...
S. incanum MM577	SMEL_010g360340.1	Ribonuclease III domain-containing protein RNC1, chloroplastic	MF	GO:0016893	endonuclease activity, active with eithe...
S. incanum MM577	SMEL_011g365390.1	Endoribonuclease Dicer homolog 2	MF	GO:0016893	endonuclease activity, active with eithe...
S. incanum MM577	SMEL_011g370450.1	Ribonuclease H	MF	GO:0016893	endonuclease activity, active with eithe...
S. incanum MM577	SMEL_011g370910.1	Phosphoglycerate mutase	MF	GO:0016893	endonuclease activity, active with eithe...
S. incanum MM577	SMEL_012g386250.1	Ribonuclease H	MF	GO:0016893	endonuclease activity, active with eithe...
S. incanum MM577	SMEL_001g115040.1	Glutamate--tRNA ligase	MF	GO:0030554	adenyl nucleotide binding
S. incanum MM577	SMEL_001g115800.1	Receptor-like kinase	MF	GO:0030554	adenyl nucleotide binding
S. incanum MM577	SMEL_001g116340.1	ATP-dependent RNA helicase	MF	GO:0030554	adenyl nucleotide binding
S. incanum MM577	SMEL_001g117140.1	SNF2 domain-containing protein CLASSY 3	MF	GO:0030554	adenyl nucleotide binding
S. incanum MM577	SMEL_001g117170.1	26S protease regulatory subunit	MF	GO:0030554	adenyl nucleotide binding
S. incanum MM577	SMEL_001g117510.1	No annotation	MF	GO:0030554	adenyl nucleotide binding
S. incanum MM577	SMEL_001g120230.1	Tir-nbs-lrr, resistance protein	MF	GO:0030554	adenyl nucleotide binding
S. incanum MM577	SMEL_001g120710.1	Phospho-2-dehydro-3-deoxyheptonate aldolase 2, chloroplastic	MF	GO:0030554	adenyl nucleotide binding
S. incanum MM577	SMEL_001g122780.1	Bifunctional folylpolyglutamate synthase + dihydrofolate synthase folC	MF	GO:0030554	adenyl nucleotide binding
S. incanum MM577	SMEL_001g123490.1	Receptor like kinase, RLK	MF	GO:0030554	adenyl nucleotide binding
S. incanum MM577	SMEL_001g123500.1	No annotation	MF	GO:0030554	adenyl nucleotide binding
S. incanum MM577	SMEL_001g124520.1	NBS-LRR resistance protein	MF	GO:0030554	adenyl nucleotide binding
S. incanum MM577	SMEL_001g125670.1	Receptor-like kinase	MF	GO:0030554	adenyl nucleotide binding
S. incanum MM577	SMEL_001g125700.1	No annotation	MF	GO:0030554	adenyl nucleotide binding
S. incanum MM577	SMEL_001g126960.1	Serine_threonine protein kinase	MF	GO:0030554	adenyl nucleotide binding
S. incanum MM577	SMEL_001g127660.1	Phospholipid-transporting ATPase	MF	GO:0030554	adenyl nucleotide binding
S. incanum MM577	SMEL_001g130020.1	Katanin p60 ATPase-containing subunit	MF	GO:0030554	adenyl nucleotide binding
S. incanum MM577	SMEL_001g132090.1	Cc-nbs-lrr, resistance protein	MF	GO:0030554	adenyl nucleotide binding
S. incanum MM577	SMEL_001g133720.1	Cc-nbs-lrr, resistance protein	MF	GO:0030554	adenyl nucleotide binding
S. incanum MM577	SMEL_001g134090.1	Myosin XI-F	MF	GO:0030554	adenyl nucleotide binding
S. incanum MM577	SMEL_001g135740.1	Receptor-like kinase	MF	GO:0030554	adenyl nucleotide binding
S. incanum MM577	SMEL_001g137400.1	ATP-dependent RNA helicase	MF	GO:0030554	adenyl nucleotide binding
S. incanum MM577	SMEL_001g139180.1	Ycf2	MF	GO:0030554	adenyl nucleotide binding
S. incanum MM577	SMEL_001g139230.1	Cc-nbs-lrr, resistance protein	MF	GO:0030554	adenyl nucleotide binding
S. incanum MM577	SMEL_001g139400.1	Isoleucine--tRNA ligase	MF	GO:0030554	adenyl nucleotide binding
S. incanum MM577	SMEL_001g140450.1	Receptor like kinase, RLK	MF	GO:0030554	adenyl nucleotide binding
S. incanum MM577	SMEL_001g144070.1	Cc-nbs-lrr, resistance protein	MF	GO:0030554	adenyl nucleotide binding
S. incanum MM577	SMEL_001g144260.1	No annotation	MF	GO:0030554	adenyl nucleotide binding
S. incanum MM577	SMEL_001g144730.1	Cc-nbs-lrr, resistance protein	MF	GO:0030554	adenyl nucleotide binding
S. incanum MM577	SMEL_001g145530.1	Cc-nbs, resistance protein fragment	MF	GO:0030554	adenyl nucleotide binding
S. incanum MM577	SMEL_001g146330.1	Cc-nbs-lrr, resistance protein with an R1 specific domain	MF	GO:0030554	adenyl nucleotide binding
S. incanum MM577	SMEL_001g146650.1	Kinesin	MF	GO:0030554	adenyl nucleotide binding
S. incanum MM577	SMEL_001g147070.1	Cc-nbs-lrr, resistance protein	MF	GO:0030554	adenyl nucleotide binding
S. incanum MM577	SMEL_001g148260.1	Tir-nbs-lrr, resistance protein	MF	GO:0030554	adenyl nucleotide binding
S. incanum MM577	SMEL_001g149240.1	Cc-nbs-lrr, resistance protein	MF	GO:0030554	adenyl nucleotide binding
S. incanum MM577	SMEL_001g149810.1	No annotation	MF	GO:0030554	adenyl nucleotide binding
S. incanum MM577	SMEL_001g150420.1	Calcium-dependent protein kinase 8	MF	GO:0030554	adenyl nucleotide binding
S. incanum MM577	SMEL_001g150550.1	No annotation	MF	GO:0030554	adenyl nucleotide binding
S. incanum MM577	SMEL_001g150590.1	No annotation	MF	GO:0030554	adenyl nucleotide binding
S. incanum MM577	SMEL_002g153930.1	Ycf2	MF	GO:0030554	adenyl nucleotide binding
S. incanum MM577	SMEL_002g154680.1	Cc-nbs-lrr, resistance protein	MF	GO:0030554	adenyl nucleotide binding
S. incanum MM577	SMEL_002g155410.1	ATP synthase subunit beta chloroplastic	MF	GO:0030554	adenyl nucleotide binding
S. incanum MM577	SMEL_002g156450.1	Ycf2	MF	GO:0030554	adenyl nucleotide binding
S. incanum MM577	SMEL_002g157030.1	Ycf2	MF	GO:0030554	adenyl nucleotide binding
S. incanum MM577	SMEL_002g157040.1	Ycf2	MF	GO:0030554	adenyl nucleotide binding
S. incanum MM577	SMEL_002g157390.1	ATP synthase subunit alpha, chloroplastic	MF	GO:0030554	adenyl nucleotide binding
S. incanum MM577	SMEL_002g159210.1	Ycf2	MF	GO:0030554	adenyl nucleotide binding
S. incanum MM577	SMEL_002g159820.1	UDP-N-acetylenolpyruvoylglucosamine reductase	MF	GO:0030554	adenyl nucleotide binding
S. incanum MM577	SMEL_002g160360.1	No annotation	MF	GO:0030554	adenyl nucleotide binding
S. incanum MM577	SMEL_002g161130.1	Adenylyl-sulfate kinase	MF	GO:0030554	adenyl nucleotide binding
S. incanum MM577	SMEL_002g161730.1	Lipid A export ATP-binding_permease protein msbA	MF	GO:0030554	adenyl nucleotide binding
S. incanum MM577	SMEL_002g163820.1	DEAD-box ATP-dependent RNA helicase 46	MF	GO:0030554	adenyl nucleotide binding
S. incanum MM577	SMEL_002g164570.1	AAA-ATPase	MF	GO:0030554	adenyl nucleotide binding
S. incanum MM577	SMEL_002g166650.1	Serine_threonine-protein kinase bud32 (EC 2.7.11.1)	MF	GO:0030554	adenyl nucleotide binding
S. incanum MM577	SMEL_002g166920.1	Serine-threonine protein kinase	MF	GO:0030554	adenyl nucleotide binding
S. incanum MM577	SMEL_002g168180.1	Katanin p60 ATPase-containing subunit	MF	GO:0030554	adenyl nucleotide binding
S. incanum MM577	SMEL_002g169040.1	Katanin p60 ATPase-containing subunit	MF	GO:0030554	adenyl nucleotide binding
S. incanum MM577	SMEL_003g169740.1	Receptor like kinase, RLK	MF	GO:0030554	adenyl nucleotide binding
S. incanum MM577	SMEL_003g170040.1	Receptor like kinase, RLK	MF	GO:0030554	adenyl nucleotide binding
S. incanum MM577	SMEL_003g170130.1	Receptor like kinase, RLK	MF	GO:0030554	adenyl nucleotide binding
S. incanum MM577	SMEL_003g170850.1	Ycf2	MF	GO:0030554	adenyl nucleotide binding
S. incanum MM577	SMEL_003g170910.1	No annotation	MF	GO:0030554	adenyl nucleotide binding
S. incanum MM577	SMEL_003g172000.1	cyclin-dependent kinase B1	MF	GO:0030554	adenyl nucleotide binding
S. incanum MM577	SMEL_003g172100.1	No annotation	MF	GO:0030554	adenyl nucleotide binding
S. incanum MM577	SMEL_003g173040.1	Receptor protein kinase-like protein	MF	GO:0030554	adenyl nucleotide binding
S. incanum MM577	SMEL_003g173270.1	Receptor like kinase, RLK	MF	GO:0030554	adenyl nucleotide binding
S. incanum MM577	SMEL_003g173550.1	Receptor protein kinase	MF	GO:0030554	adenyl nucleotide binding
S. incanum MM577	SMEL_003g173800.1	CBL-interacting protein kinase 16	MF	GO:0030554	adenyl nucleotide binding
S. incanum MM577	SMEL_003g173820.1	Receptor like kinase, RLK	MF	GO:0030554	adenyl nucleotide binding
S. incanum MM577	SMEL_003g173830.1	Receptor like kinase, RLK	MF	GO:0030554	adenyl nucleotide binding
S. incanum MM577	SMEL_003g174390.1	No annotation	MF	GO:0030554	adenyl nucleotide binding
S. incanum MM577	SMEL_003g175020.1	Disease resistance protein	MF	GO:0030554	adenyl nucleotide binding
S. incanum MM577	SMEL_003g175350.1	Ycf2	MF	GO:0030554	adenyl nucleotide binding
S. incanum MM577	SMEL_003g176730.1	ATP-citrate synthase alpha chain protein 2	MF	GO:0030554	adenyl nucleotide binding
S. incanum MM577	SMEL_003g177520.1	Receptor-like protein kinase	MF	GO:0030554	adenyl nucleotide binding
S. incanum MM577	SMEL_003g177710.1	Ycf2	MF	GO:0030554	adenyl nucleotide binding
S. incanum MM577	SMEL_003g177770.1	Ycf2	MF	GO:0030554	adenyl nucleotide binding
S. incanum MM577	SMEL_003g177910.1	Receptor like kinase, RLK	MF	GO:0030554	adenyl nucleotide binding
S. incanum MM577	SMEL_003g178410.1	Alpha-glucan water dikinase, chloroplastic	MF	GO:0030554	adenyl nucleotide binding
S. incanum MM577	SMEL_003g179100.1	Cc-nbs-lrr, resistance protein with an R1 specific domain	MF	GO:0030554	adenyl nucleotide binding
S. incanum MM577	SMEL_003g179520.1	Receptor like kinase, RLK	MF	GO:0030554	adenyl nucleotide binding
S. incanum MM577	SMEL_003g179540.1	Receptor like kinase, RLK	MF	GO:0030554	adenyl nucleotide binding
S. incanum MM577	SMEL_003g179990.1	No annotation	MF	GO:0030554	adenyl nucleotide binding
S. incanum MM577	SMEL_003g181610.1	Kinesin-like protein	MF	GO:0030554	adenyl nucleotide binding
S. incanum MM577	SMEL_003g182610.1	ABC transporter B family member 28	MF	GO:0030554	adenyl nucleotide binding
S. incanum MM577	SMEL_003g183630.1	Multidrug resistance protein ABC transporter family	MF	GO:0030554	adenyl nucleotide binding
S. incanum MM577	SMEL_003g183950.1	Receptor kinase	MF	GO:0030554	adenyl nucleotide binding
S. incanum MM577	SMEL_003g184730.1	ATPase AAA family protein expressed	MF	GO:0030554	adenyl nucleotide binding
S. incanum MM577	SMEL_003g184740.1	ATPase family AAA domain-containing protein 1-B	MF	GO:0030554	adenyl nucleotide binding
S. incanum MM577	SMEL_003g185440.1	Endonuclease MutS2	MF	GO:0030554	adenyl nucleotide binding
S. incanum MM577	SMEL_003g185820.1	Growth-regulating factor 4	MF	GO:0030554	adenyl nucleotide binding
S. incanum MM577	SMEL_003g187100.1	ATP synthase subunit beta chloroplastic	MF	GO:0030554	adenyl nucleotide binding
S. incanum MM577	SMEL_003g187750.1	No annotation	MF	GO:0030554	adenyl nucleotide binding
S. incanum MM577	SMEL_003g188130.1	No annotation	MF	GO:0030554	adenyl nucleotide binding
S. incanum MM577	SMEL_003g188600.1	Receptor-like kinase	MF	GO:0030554	adenyl nucleotide binding
S. incanum MM577	SMEL_003g188620.1	Ycf2	MF	GO:0030554	adenyl nucleotide binding
S. incanum MM577	SMEL_003g189030.1	DNA polymerase III gamma_tau subunit	MF	GO:0030554	adenyl nucleotide binding
S. incanum MM577	SMEL_003g189130.1	Receptor like kinase, RLK	MF	GO:0030554	adenyl nucleotide binding
S. incanum MM577	SMEL_003g189930.1	No annotation	MF	GO:0030554	adenyl nucleotide binding
S. incanum MM577	SMEL_003g191260.1	Ycf2	MF	GO:0030554	adenyl nucleotide binding
S. incanum MM577	SMEL_003g194630.1	Multidrug resistance protein ABC transporter family	MF	GO:0030554	adenyl nucleotide binding
S. incanum MM577	SMEL_003g195210.1	ATP-dependent clp protease ATP-binding subunit	MF	GO:0030554	adenyl nucleotide binding
S. incanum MM577	SMEL_003g196470.1	Chaperone protein dnaJ	MF	GO:0030554	adenyl nucleotide binding
S. incanum MM577	SMEL_003g198560.1	Hexokinase	MF	GO:0030554	adenyl nucleotide binding
S. incanum MM577	SMEL_003g198800.1	Chaperonin 60 subunit beta 1, chloroplastic	MF	GO:0030554	adenyl nucleotide binding
S. incanum MM577	SMEL_003g198830.1	No annotation	MF	GO:0030554	adenyl nucleotide binding
S. incanum MM577	SMEL_003g199240.1	Ycf2	MF	GO:0030554	adenyl nucleotide binding
S. incanum MM577	SMEL_003g199490.1	No annotation	MF	GO:0030554	adenyl nucleotide binding
S. incanum MM577	SMEL_004g202040.1	No annotation	MF	GO:0030554	adenyl nucleotide binding
S. incanum MM577	SMEL_004g203730.1	No annotation	MF	GO:0030554	adenyl nucleotide binding
S. incanum MM577	SMEL_004g204750.1	DEAD-box ATP-dependent RNA helicase 35	MF	GO:0030554	adenyl nucleotide binding
S. incanum MM577	SMEL_004g205440.1	Phosphatidylinositol-4-phosphate 5-kinase family protein	MF	GO:0030554	adenyl nucleotide binding
S. incanum MM577	SMEL_004g205510.1	DNA mismatch repair protein MutS	MF	GO:0030554	adenyl nucleotide binding
S. incanum MM577	SMEL_004g205900.1	Cc-nbs-lrr, resistance protein	MF	GO:0030554	adenyl nucleotide binding
S. incanum MM577	SMEL_004g207680.1	No annotation	MF	GO:0030554	adenyl nucleotide binding
S. incanum MM577	SMEL_004g208990.1	ATP synthase subunit alpha, chloroplastic	MF	GO:0030554	adenyl nucleotide binding
S. incanum MM577	SMEL_004g209060.1	No annotation	MF	GO:0030554	adenyl nucleotide binding
S. incanum MM577	SMEL_004g209790.1	Dephospho-CoA kinase	MF	GO:0030554	adenyl nucleotide binding
S. incanum MM577	SMEL_004g209820.1	Dephospho-CoA kinase	MF	GO:0030554	adenyl nucleotide binding
S. incanum MM577	SMEL_004g210440.1	No annotation	MF	GO:0030554	adenyl nucleotide binding
S. incanum MM577	SMEL_004g210490.1	Cc-nbs-lrr, resistance protein	MF	GO:0030554	adenyl nucleotide binding
S. incanum MM577	SMEL_004g211190.1	Receptor-like kinase	MF	GO:0030554	adenyl nucleotide binding
S. incanum MM577	SMEL_004g211680.1	Receptor like kinase, RLK	MF	GO:0030554	adenyl nucleotide binding
S. incanum MM577	SMEL_004g211720.1	Receptor serine_threonine kinase	MF	GO:0030554	adenyl nucleotide binding
S. incanum MM577	SMEL_004g212310.1	No annotation	MF	GO:0030554	adenyl nucleotide binding
S. incanum MM577	SMEL_004g215020.1	No annotation	MF	GO:0030554	adenyl nucleotide binding
S. incanum MM577	SMEL_004g215800.1	Receptor like kinase, RLK	MF	GO:0030554	adenyl nucleotide binding
S. incanum MM577	SMEL_004g216010.1	Receptor like kinase, RLK	MF	GO:0030554	adenyl nucleotide binding
S. incanum MM577	SMEL_004g218130.1	Serine_threonine-protein kinase receptor	MF	GO:0030554	adenyl nucleotide binding
S. incanum MM577	SMEL_004g218160.1	Serine_threonine-protein kinase receptor	MF	GO:0030554	adenyl nucleotide binding
S. incanum MM577	SMEL_004g218510.1	No annotation	MF	GO:0030554	adenyl nucleotide binding
S. incanum MM577	SMEL_004g219410.1	No annotation	MF	GO:0030554	adenyl nucleotide binding
S. incanum MM577	SMEL_004g220040.1	Cc-nbs-lrr, resistance protein with an R1 specific domain	MF	GO:0030554	adenyl nucleotide binding
S. incanum MM577	SMEL_004g220370.1	Receptor-like protein kinase 2	MF	GO:0030554	adenyl nucleotide binding
S. incanum MM577	SMEL_004g221410.1	Inositol pentakisphosphate 2-kinase	MF	GO:0030554	adenyl nucleotide binding
S. incanum MM577	SMEL_004g221420.1	No annotation	MF	GO:0030554	adenyl nucleotide binding
S. incanum MM577	SMEL_004g221660.1	ATP synthase subunit alpha, chloroplastic	MF	GO:0030554	adenyl nucleotide binding
S. incanum MM577	SMEL_004g221810.1	Receptor like kinase, RLK	MF	GO:0030554	adenyl nucleotide binding
S. incanum MM577	SMEL_004g223500.1	Protein FAR1-RELATED SEQUENCE 5	MF	GO:0030554	adenyl nucleotide binding
S. incanum MM577	SMEL_005g226260.1	No annotation	MF	GO:0030554	adenyl nucleotide binding
S. incanum MM577	SMEL_005g227010.1	Serine_threonine kinase receptor	MF	GO:0030554	adenyl nucleotide binding
S. incanum MM577	SMEL_005g227290.1	Folylpolyglutamate synthase	MF	GO:0030554	adenyl nucleotide binding
S. incanum MM577	SMEL_005g227380.1	Receptor like protein kinase	MF	GO:0030554	adenyl nucleotide binding
S. incanum MM577	SMEL_005g228020.1	No annotation	MF	GO:0030554	adenyl nucleotide binding
S. incanum MM577	SMEL_005g228040.1	No annotation	MF	GO:0030554	adenyl nucleotide binding
S. incanum MM577	SMEL_005g230780.1	Aspartate--tRNA ligase 2, cytoplasmic	MF	GO:0030554	adenyl nucleotide binding
S. incanum MM577	SMEL_005g230920.1	Receptor like kinase, RLK	MF	GO:0030554	adenyl nucleotide binding
S. incanum MM577	SMEL_005g231080.1	ABC transporter G family member 5	MF	GO:0030554	adenyl nucleotide binding
S. incanum MM577	SMEL_005g231290.1	ATP synthase subunit alpha, chloroplastic	MF	GO:0030554	adenyl nucleotide binding
S. incanum MM577	SMEL_005g232130.1	Cc-nbs-lrr, resistance protein	MF	GO:0030554	adenyl nucleotide binding
S. incanum MM577	SMEL_005g232160.1	Ycf2	MF	GO:0030554	adenyl nucleotide binding
S. incanum MM577	SMEL_005g232190.1	Chromodomain-helicase-DNA-binding protein 3	MF	GO:0030554	adenyl nucleotide binding
S. incanum MM577	SMEL_005g232760.1	Ycf2	MF	GO:0030554	adenyl nucleotide binding
S. incanum MM577	SMEL_005g234350.1	RNA cytidine acetyltransferase 1	MF	GO:0030554	adenyl nucleotide binding
S. incanum MM577	SMEL_005g234630.1	V-type proton ATPase catalytic subunit A	MF	GO:0030554	adenyl nucleotide binding
S. incanum MM577	SMEL_005g234730.1	Tir-nbs-lrr, resistance protein	MF	GO:0030554	adenyl nucleotide binding
S. incanum MM577	SMEL_005g236820.1	Serine_threonine-protein kinase 38	MF	GO:0030554	adenyl nucleotide binding
S. incanum MM577	SMEL_005g237070.1	Pre-mRNA splicing factor ATP-dependent RNA helicase-like protein	MF	GO:0030554	adenyl nucleotide binding
S. incanum MM577	SMEL_005g238900.1	ATP-dependent RNA helicase eIF4A	MF	GO:0030554	adenyl nucleotide binding
S. incanum MM577	SMEL_005g240050.1	Tir-nbs-lrr, resistance protein	MF	GO:0030554	adenyl nucleotide binding
S. incanum MM577	SMEL_005g240070.1	No annotation	MF	GO:0030554	adenyl nucleotide binding
S. incanum MM577	SMEL_005g240080.1	No annotation	MF	GO:0030554	adenyl nucleotide binding
S. incanum MM577	SMEL_005g240170.1	Cc-nbs-lrr, resistance protein	MF	GO:0030554	adenyl nucleotide binding
S. incanum MM577	SMEL_005g241130.1	No annotation	MF	GO:0030554	adenyl nucleotide binding
S. incanum MM577	SMEL_005g238790.1	Tir-nbs-lrr, resistance protein	MF	GO:0030554	adenyl nucleotide binding
S. incanum MM577	SMEL_005g239090.1	CBL-interacting protein kinase 1	MF	GO:0030554	adenyl nucleotide binding
S. incanum MM577	SMEL_005g240330.1	Kinesin like protein	MF	GO:0030554	adenyl nucleotide binding
S. incanum MM577	SMEL_006g242520.1	TFIIH basal transcription factor complex helicase XPD subunit	MF	GO:0030554	adenyl nucleotide binding
S. incanum MM577	SMEL_006g243400.1	Receptor like kinase, RLK	MF	GO:0030554	adenyl nucleotide binding
S. incanum MM577	SMEL_006g243420.1	Protein kinase-like protein	MF	GO:0030554	adenyl nucleotide binding
S. incanum MM577	SMEL_006g243760.1	Myosin XI-2	MF	GO:0030554	adenyl nucleotide binding
S. incanum MM577	SMEL_006g244180.1	Cc-nbs-lrr, resistance protein	MF	GO:0030554	adenyl nucleotide binding
S. incanum MM577	SMEL_006g244940.1	Kinesin	MF	GO:0030554	adenyl nucleotide binding
S. incanum MM577	SMEL_006g246280.1	Cc-nbs-lrr, resistance protein	MF	GO:0030554	adenyl nucleotide binding
S. incanum MM577	SMEL_006g247010.1	Folylpolyglutamate synthase	MF	GO:0030554	adenyl nucleotide binding
S. incanum MM577	SMEL_006g247250.1	Receptor like kinase, RLK	MF	GO:0030554	adenyl nucleotide binding
S. incanum MM577	SMEL_006g247310.1	Receptor like kinase, RLK	MF	GO:0030554	adenyl nucleotide binding
S. incanum MM577	SMEL_006g247350.1	Receptor like kinase, RLK	MF	GO:0030554	adenyl nucleotide binding
S. incanum MM577	SMEL_006g247360.1	Receptor like kinase, RLK	MF	GO:0030554	adenyl nucleotide binding
S. incanum MM577	SMEL_006g247840.1	No annotation	MF	GO:0030554	adenyl nucleotide binding
S. incanum MM577	SMEL_006g248250.1	Cc-nbs-lrr, resistance protein	MF	GO:0030554	adenyl nucleotide binding
S. incanum MM577	SMEL_006g248280.1	Cc-nbs-lrr, resistance protein	MF	GO:0030554	adenyl nucleotide binding
S. incanum MM577	SMEL_006g248300.1	Cc-nbs-lrr, resistance protein	MF	GO:0030554	adenyl nucleotide binding
S. incanum MM577	SMEL_006g250300.1	Receptor like kinase, RLK	MF	GO:0030554	adenyl nucleotide binding
S. incanum MM577	SMEL_006g250350.1	Cc-nbs-lrr, resistance protein	MF	GO:0030554	adenyl nucleotide binding
S. incanum MM577	SMEL_006g250640.1	Ycf2	MF	GO:0030554	adenyl nucleotide binding
S. incanum MM577	SMEL_006g251200.1	Cc-nbs-lrr, resistance protein	MF	GO:0030554	adenyl nucleotide binding
S. incanum MM577	SMEL_006g251220.1	Multidrug resistance protein ABC transporter family	MF	GO:0030554	adenyl nucleotide binding
S. incanum MM577	SMEL_006g251470.1	No annotation	MF	GO:0030554	adenyl nucleotide binding
S. incanum MM577	SMEL_006g252340.1	Serine_threonine-protein kinase-like protein	MF	GO:0030554	adenyl nucleotide binding
S. incanum MM577	SMEL_006g252510.1	Receptor like kinase, RLK	MF	GO:0030554	adenyl nucleotide binding
S. incanum MM577	SMEL_006g253040.1	Cc-nbs-lrr, resistance protein	MF	GO:0030554	adenyl nucleotide binding
S. incanum MM577	SMEL_006g253610.1	Receptor-like protein kinase	MF	GO:0030554	adenyl nucleotide binding
S. incanum MM577	SMEL_006g253620.1	No annotation	MF	GO:0030554	adenyl nucleotide binding
S. incanum MM577	SMEL_006g253710.1	No annotation	MF	GO:0030554	adenyl nucleotide binding
S. incanum MM577	SMEL_006g256020.1	Kinesin like protein	MF	GO:0030554	adenyl nucleotide binding
S. incanum MM577	SMEL_006g256730.1	Receptor-like protein kinase	MF	GO:0030554	adenyl nucleotide binding
S. incanum MM577	SMEL_006g258740.1	No annotation	MF	GO:0030554	adenyl nucleotide binding
S. incanum MM577	SMEL_006g258930.1	T-complex protein eta subunit	MF	GO:0030554	adenyl nucleotide binding
S. incanum MM577	SMEL_006g259650.1	CBL-interacting protein kinase 18	MF	GO:0030554	adenyl nucleotide binding
S. incanum MM577	SMEL_006g259660.1	Cc-nbs, resistance protein fragment	MF	GO:0030554	adenyl nucleotide binding
S. incanum MM577	SMEL_006g259910.1	Cc-nbs-lrr, resistance protein	MF	GO:0030554	adenyl nucleotide binding
S. incanum MM577	SMEL_006g261320.1	Proline--tRNA ligase	MF	GO:0030554	adenyl nucleotide binding
S. incanum MM577	SMEL_006g261380.1	Proline--tRNA ligase	MF	GO:0030554	adenyl nucleotide binding
S. incanum MM577	SMEL_006g261580.1	No annotation	MF	GO:0030554	adenyl nucleotide binding
S. incanum MM577	SMEL_006g262500.1	Related to ATP dependent RNA helicase	MF	GO:0030554	adenyl nucleotide binding
S. incanum MM577	SMEL_006g262730.1	Receptor like kinase, RLK	MF	GO:0030554	adenyl nucleotide binding
S. incanum MM577	SMEL_006g262950.1	ABC transporter A family member 7	MF	GO:0030554	adenyl nucleotide binding
S. incanum MM577	SMEL_006g262970.1	ABC transporter A family member 7	MF	GO:0030554	adenyl nucleotide binding
S. incanum MM577	SMEL_006g263700.1	Related to ATP dependent RNA helicase	MF	GO:0030554	adenyl nucleotide binding
S. incanum MM577	SMEL_006g264090.1	ABC transporter G family member 11	MF	GO:0030554	adenyl nucleotide binding
S. incanum MM577	SMEL_006g264100.1	ABC transporter G family member 11	MF	GO:0030554	adenyl nucleotide binding
S. incanum MM577	SMEL_006g265790.1	Structural maintenance of chromosomes protein 3	MF	GO:0030554	adenyl nucleotide binding
S. incanum MM577	SMEL_006g266920.1	ABC transporter G family member 3	MF	GO:0030554	adenyl nucleotide binding
S. incanum MM577	SMEL_006g267290.1	Carbamoyl-phosphate synthase large chain	MF	GO:0030554	adenyl nucleotide binding
S. incanum MM577	SMEL_006g269630.1	Protein kinase	MF	GO:0030554	adenyl nucleotide binding
S. incanum MM577	SMEL_006g270960.1	ATPase family AAA domain-containing protein 1	MF	GO:0030554	adenyl nucleotide binding
S. incanum MM577	SMEL_007g271670.1	ATP-dependent RNA helicase	MF	GO:0030554	adenyl nucleotide binding
S. incanum MM577	SMEL_007g272640.1	Receptor like kinase, RLK	MF	GO:0030554	adenyl nucleotide binding
S. incanum MM577	SMEL_007g273220.1	S-receptor kinase-like protein 1	MF	GO:0030554	adenyl nucleotide binding
S. incanum MM577	SMEL_007g273850.1	No annotation	MF	GO:0030554	adenyl nucleotide binding
S. incanum MM577	SMEL_007g274410.1	Receptor-like protein kinase	MF	GO:0030554	adenyl nucleotide binding
S. incanum MM577	SMEL_007g274600.1	T-complex protein 1 subunit epsilon	MF	GO:0030554	adenyl nucleotide binding
S. incanum MM577	SMEL_007g275800.1	ATP synthase subunit beta chloroplastic	MF	GO:0030554	adenyl nucleotide binding
S. incanum MM577	SMEL_007g276320.1	No annotation	MF	GO:0030554	adenyl nucleotide binding
S. incanum MM577	SMEL_007g279890.1	No annotation	MF	GO:0030554	adenyl nucleotide binding
S. incanum MM577	SMEL_007g279910.1	Galactokinase-like protein	MF	GO:0030554	adenyl nucleotide binding
S. incanum MM577	SMEL_007g280070.1	Cc-nbs-lrr, resistance protein	MF	GO:0030554	adenyl nucleotide binding
S. incanum MM577	SMEL_007g280250.1	Ycf2	MF	GO:0030554	adenyl nucleotide binding
S. incanum MM577	SMEL_007g280320.1	Receptor protein kinase	MF	GO:0030554	adenyl nucleotide binding
S. incanum MM577	SMEL_007g280940.1	Chromodomain-helicase-DNA-binding protein 1-like	MF	GO:0030554	adenyl nucleotide binding
S. incanum MM577	SMEL_007g282110.1	ATP synthase subunit beta chloroplastic	MF	GO:0030554	adenyl nucleotide binding
S. incanum MM577	SMEL_007g282150.1	Myosin XI	MF	GO:0030554	adenyl nucleotide binding
S. incanum MM577	SMEL_007g284370.1	DNA repair protein	MF	GO:0030554	adenyl nucleotide binding
S. incanum MM577	SMEL_007g285390.1	Wall-associated receptor kinase 2	MF	GO:0030554	adenyl nucleotide binding
S. incanum MM577	SMEL_007g287220.1	Cc-nbs-lrr, resistance protein	MF	GO:0030554	adenyl nucleotide binding
S. incanum MM577	SMEL_007g288020.1	Cc-nbs-lrr, resistance protein	MF	GO:0030554	adenyl nucleotide binding
S. incanum MM577	SMEL_007g288270.1	Chromodomain-helicase-DNA-binding protein 1-like	MF	GO:0030554	adenyl nucleotide binding
S. incanum MM577	SMEL_007g289100.1	No annotation	MF	GO:0030554	adenyl nucleotide binding
S. incanum MM577	SMEL_007g289170.1	Receptor protein kinase	MF	GO:0030554	adenyl nucleotide binding
S. incanum MM577	SMEL_007g290120.1	Receptor like kinase, RLK	MF	GO:0030554	adenyl nucleotide binding
S. incanum MM577	SMEL_007g290420.1	DNA excision repair protein ERCC-6-like 2	MF	GO:0030554	adenyl nucleotide binding
S. incanum MM577	SMEL_007g290470.1	Mitotic checkpoint serine/threonine-protein kinase BUB1	MF	GO:0030554	adenyl nucleotide binding
S. incanum MM577	SMEL_007g291020.1	ABC transporter G family member 10	MF	GO:0030554	adenyl nucleotide binding
S. incanum MM577	SMEL_007g291550.1	Receptor-like kinase	MF	GO:0030554	adenyl nucleotide binding
S. incanum MM577	SMEL_007g293020.1	Receptor-like kinase	MF	GO:0030554	adenyl nucleotide binding
S. incanum MM577	SMEL_007g293090.1	Serine_threonine-protein kinase receptor	MF	GO:0030554	adenyl nucleotide binding
S. incanum MM577	SMEL_007g293120.1	Serine_threonine kinase receptor	MF	GO:0030554	adenyl nucleotide binding
S. incanum MM577	SMEL_007g295590.1	Protein grpE	MF	GO:0030554	adenyl nucleotide binding
S. incanum MM577	SMEL_007g295890.1	Kinesin-like protein	MF	GO:0030554	adenyl nucleotide binding
S. incanum MM577	SMEL_007g296800.1	No annotation	MF	GO:0030554	adenyl nucleotide binding
S. incanum MM577	SMEL_007g296940.1	Protein recA	MF	GO:0030554	adenyl nucleotide binding
S. incanum MM577	SMEL_007g297250.1	No annotation	MF	GO:0030554	adenyl nucleotide binding
S. incanum MM577	SMEL_007g297260.1	No annotation	MF	GO:0030554	adenyl nucleotide binding
S. incanum MM577	SMEL_008g298140.1	Cc-nbs-lrr, resistance protein	MF	GO:0030554	adenyl nucleotide binding
S. incanum MM577	SMEL_008g298960.1	Kinase family protein	MF	GO:0030554	adenyl nucleotide binding
S. incanum MM577	SMEL_008g299620.1	Tir-nbs-lrr, resistance protein	MF	GO:0030554	adenyl nucleotide binding
S. incanum MM577	SMEL_008g300190.1	Cc-nbs-lrr, resistance protein	MF	GO:0030554	adenyl nucleotide binding
S. incanum MM577	SMEL_008g300390.1	No annotation	MF	GO:0030554	adenyl nucleotide binding
S. incanum MM577	SMEL_008g302960.1	ATP synthase subunit alpha, mitochondrial	MF	GO:0030554	adenyl nucleotide binding
S. incanum MM577	SMEL_008g303240.1	Serine_threonine-protein kinase 38	MF	GO:0030554	adenyl nucleotide binding
S. incanum MM577	SMEL_008g304050.1	ATP synthase subunit alpha chloroplastic	MF	GO:0030554	adenyl nucleotide binding
S. incanum MM577	SMEL_008g308700.1	Ycf2	MF	GO:0030554	adenyl nucleotide binding
S. incanum MM577	SMEL_008g311760.1	No annotation	MF	GO:0030554	adenyl nucleotide binding
S. incanum MM577	SMEL_008g311920.1	No annotation	MF	GO:0030554	adenyl nucleotide binding
S. incanum MM577	SMEL_008g312220.1	Cc-nbs-lrr, resistance protein	MF	GO:0030554	adenyl nucleotide binding
S. incanum MM577	SMEL_008g312400.1	ATP-dependent DNA helicase Q1	MF	GO:0030554	adenyl nucleotide binding
S. incanum MM577	SMEL_008g312720.1	ATP binding _ serine-threonine kinase	MF	GO:0030554	adenyl nucleotide binding
S. incanum MM577	SMEL_008g313150.1	No annotation	MF	GO:0030554	adenyl nucleotide binding
S. incanum MM577	SMEL_008g313410.1	Ycf2	MF	GO:0030554	adenyl nucleotide binding
S. incanum MM577	SMEL_008g315720.1	DNA helicase	MF	GO:0030554	adenyl nucleotide binding
S. incanum MM577	SMEL_008g315730.1	Receptor like kinase, RLK	MF	GO:0030554	adenyl nucleotide binding
S. incanum MM577	SMEL_008g315980.1	No annotation	MF	GO:0030554	adenyl nucleotide binding
S. incanum MM577	SMEL_008g318920.1	Receptor like kinase, RLK	MF	GO:0030554	adenyl nucleotide binding
S. incanum MM577	SMEL_009g321940.1	Valine--tRNA ligase	MF	GO:0030554	adenyl nucleotide binding
S. incanum MM577	SMEL_009g325220.1	Cc-nbs, resistance protein fragment	MF	GO:0030554	adenyl nucleotide binding
S. incanum MM577	SMEL_009g325620.1	Kinase family protein	MF	GO:0030554	adenyl nucleotide binding
S. incanum MM577	SMEL_009g327330.1	Cc-nbs-lrr, resistance protein	MF	GO:0030554	adenyl nucleotide binding
S. incanum MM577	SMEL_009g330330.1	Homoserine kinase	MF	GO:0030554	adenyl nucleotide binding
S. incanum MM577	SMEL_009g331780.1	Ycf2	MF	GO:0030554	adenyl nucleotide binding
S. incanum MM577	SMEL_009g332530.1	No annotation	MF	GO:0030554	adenyl nucleotide binding
S. incanum MM577	SMEL_009g332630.1	Kinesin like protein	MF	GO:0030554	adenyl nucleotide binding
S. incanum MM577	SMEL_009g333840.1	No annotation	MF	GO:0030554	adenyl nucleotide binding
S. incanum MM577	SMEL_009g333880.1	Chromosome transmission fidelity protein 18 homolog	MF	GO:0030554	adenyl nucleotide binding
S. incanum MM577	SMEL_009g334450.1	No annotation	MF	GO:0030554	adenyl nucleotide binding
S. incanum MM577	SMEL_009g334630.1	Cc-nbs-lrr, resistance protein	MF	GO:0030554	adenyl nucleotide binding
S. incanum MM577	SMEL_009g334930.1	Kinesin-like protein	MF	GO:0030554	adenyl nucleotide binding
S. incanum MM577	SMEL_010g337090.1	Receptor-like kinase	MF	GO:0030554	adenyl nucleotide binding
S. incanum MM577	SMEL_010g337120.1	Receptor-like protein kinase	MF	GO:0030554	adenyl nucleotide binding
S. incanum MM577	SMEL_010g337840.1	Receptor-like kinase	MF	GO:0030554	adenyl nucleotide binding
S. incanum MM577	SMEL_010g337860.1	Receptor-like protein kinase	MF	GO:0030554	adenyl nucleotide binding
S. incanum MM577	SMEL_010g337920.1	Receptor-like protein kinase	MF	GO:0030554	adenyl nucleotide binding
S. incanum MM577	SMEL_010g337930.1	Receptor-like protein kinase	MF	GO:0030554	adenyl nucleotide binding
S. incanum MM577	SMEL_010g337950.1	Receptor-like protein kinase	MF	GO:0030554	adenyl nucleotide binding
S. incanum MM577	SMEL_010g338620.1	Nbs-lrr, resistance protein	MF	GO:0030554	adenyl nucleotide binding
S. incanum MM577	SMEL_010g339810.1	Nbs, resistance protein fragment	MF	GO:0030554	adenyl nucleotide binding
S. incanum MM577	SMEL_010g340940.1	Nbs-lrr, resistance protein	MF	GO:0030554	adenyl nucleotide binding
S. incanum MM577	SMEL_010g341030.1	Receptor-like kinase	MF	GO:0030554	adenyl nucleotide binding
S. incanum MM577	SMEL_010g341330.1	Receptor like kinase, RLK	MF	GO:0030554	adenyl nucleotide binding
S. incanum MM577	SMEL_010g342590.1	ATP-dependent zinc metalloprotease FTSH 12, chloroplastic	MF	GO:0030554	adenyl nucleotide binding
S. incanum MM577	SMEL_010g343050.1	ATP synthase subunit beta chloroplastic	MF	GO:0030554	adenyl nucleotide binding
S. incanum MM577	SMEL_010g344350.1	Valine--tRNA ligase	MF	GO:0030554	adenyl nucleotide binding
S. incanum MM577	SMEL_010g344660.1	Cc-nbs-lrr, resistance protein	MF	GO:0030554	adenyl nucleotide binding
S. incanum MM577	SMEL_010g344790.1	DNA gyrase subunit B	MF	GO:0030554	adenyl nucleotide binding
S. incanum MM577	SMEL_010g345550.1	Kinesin like protein	MF	GO:0030554	adenyl nucleotide binding
S. incanum MM577	SMEL_010g346720.1	Protein kinase 2	MF	GO:0030554	adenyl nucleotide binding
S. incanum MM577	SMEL_010g347750.1	Cc-nbs-lrr, resistance protein	MF	GO:0030554	adenyl nucleotide binding
S. incanum MM577	SMEL_010g348930.1	Tir-nbs-lrr, resistance protein	MF	GO:0030554	adenyl nucleotide binding
S. incanum MM577	SMEL_010g349000.1	Phospholipid-transporting ATPase	MF	GO:0030554	adenyl nucleotide binding
S. incanum MM577	SMEL_010g349810.1	DNA helicase	MF	GO:0030554	adenyl nucleotide binding
S. incanum MM577	SMEL_010g351120.1	No annotation	MF	GO:0030554	adenyl nucleotide binding
S. incanum MM577	SMEL_010g351230.1	No annotation	MF	GO:0030554	adenyl nucleotide binding
S. incanum MM577	SMEL_010g351670.1	No annotation	MF	GO:0030554	adenyl nucleotide binding
S. incanum MM577	SMEL_010g351800.1	AAA-ATPase	MF	GO:0030554	adenyl nucleotide binding
S. incanum MM577	SMEL_010g352830.1	Wall-associated receptor kinase 5	MF	GO:0030554	adenyl nucleotide binding
S. incanum MM577	SMEL_010g353560.1	Chaperonin 60 subunit beta 4, chloroplastic	MF	GO:0030554	adenyl nucleotide binding
S. incanum MM577	SMEL_010g354000.1	cyclin-dependent kinase B1	MF	GO:0030554	adenyl nucleotide binding
S. incanum MM577	SMEL_010g354260.1	Phospholipid-transporting ATPase	MF	GO:0030554	adenyl nucleotide binding
S. incanum MM577	SMEL_010g355170.1	Cc-nbs-lrr, resistance protein with an R1 specific domain	MF	GO:0030554	adenyl nucleotide binding
S. incanum MM577	SMEL_010g355360.1	Cc-nbs-lrr, resistance protein	MF	GO:0030554	adenyl nucleotide binding
S. incanum MM577	SMEL_010g359590.1	No annotation	MF	GO:0030554	adenyl nucleotide binding
S. incanum MM577	SMEL_010g360560.1	Serine_threonine protein kinase	MF	GO:0030554	adenyl nucleotide binding
S. incanum MM577	SMEL_011g362340.1	No annotation	MF	GO:0030554	adenyl nucleotide binding
S. incanum MM577	SMEL_011g362400.1	Tir-nbs-lrr, resistance protein	MF	GO:0030554	adenyl nucleotide binding
S. incanum MM577	SMEL_011g362460.1	Tir-nbs-lrr, resistance protein	MF	GO:0030554	adenyl nucleotide binding
S. incanum MM577	SMEL_011g362550.1	Tir-nbs-lrr, resistance protein	MF	GO:0030554	adenyl nucleotide binding
S. incanum MM577	SMEL_011g362870.1	Receptor like kinase, RLK	MF	GO:0030554	adenyl nucleotide binding
S. incanum MM577	SMEL_011g363490.1	Tir-nbs-lrr, resistance protein	MF	GO:0030554	adenyl nucleotide binding
S. incanum MM577	SMEL_011g363540.1	Tir-nbs-lrr, resistance protein	MF	GO:0030554	adenyl nucleotide binding
S. incanum MM577	SMEL_011g364140.1	No annotation	MF	GO:0030554	adenyl nucleotide binding
S. incanum MM577	SMEL_011g364690.1	Cc-nbs-lrr, resistance protein	MF	GO:0030554	adenyl nucleotide binding
S. incanum MM577	SMEL_011g364700.1	Serine-threonine protein kinase	MF	GO:0030554	adenyl nucleotide binding
S. incanum MM577	SMEL_011g366610.1	No annotation	MF	GO:0030554	adenyl nucleotide binding
S. incanum MM577	SMEL_011g366630.1	No annotation	MF	GO:0030554	adenyl nucleotide binding
S. incanum MM577	SMEL_011g366660.1	No annotation	MF	GO:0030554	adenyl nucleotide binding
S. incanum MM577	SMEL_011g367810.1	Cc-nbs-lrr, resistance protein	MF	GO:0030554	adenyl nucleotide binding
S. incanum MM577	SMEL_011g368160.1	Tir-nbs-lrr, resistance protein	MF	GO:0030554	adenyl nucleotide binding
S. incanum MM577	SMEL_011g369640.1	ATP synthase subunit alpha, chloroplastic	MF	GO:0030554	adenyl nucleotide binding
S. incanum MM577	SMEL_011g371310.1	Cc-nbs-lrr, resistance protein	MF	GO:0030554	adenyl nucleotide binding
S. incanum MM577	SMEL_011g371820.1	Cc-nbs-lrr, resistance protein with an R1 specific domain	MF	GO:0030554	adenyl nucleotide binding
S. incanum MM577	SMEL_011g372120.1	ATP synthase subunit beta chloroplastic	MF	GO:0030554	adenyl nucleotide binding
S. incanum MM577	SMEL_011g373210.1	Cc-nbs-lrr, resistance protein	MF	GO:0030554	adenyl nucleotide binding
S. incanum MM577	SMEL_011g373230.1	Cc-nbs-lrr, resistance protein	MF	GO:0030554	adenyl nucleotide binding
S. incanum MM577	SMEL_011g373540.1	Cc-nbs-lrr, resistance protein	MF	GO:0030554	adenyl nucleotide binding
S. incanum MM577	SMEL_011g374240.1	Cc-nbs-lrr, resistance protein	MF	GO:0030554	adenyl nucleotide binding
S. incanum MM577	SMEL_011g374300.1	Cc-nbs-lrr, resistance protein	MF	GO:0030554	adenyl nucleotide binding
S. incanum MM577	SMEL_011g374900.1	Cc-nbs-lrr, resistance protein	MF	GO:0030554	adenyl nucleotide binding
S. incanum MM577	SMEL_011g375310.1	Cc-nbs-lrr, resistance protein	MF	GO:0030554	adenyl nucleotide binding
S. incanum MM577	SMEL_011g375450.1	Receptor like kinase, RLK	MF	GO:0030554	adenyl nucleotide binding
S. incanum MM577	SMEL_011g376310.1	UDP-N-acetylmuramoyl-tripeptide--D-alanyl-D-alanine ligase	MF	GO:0030554	adenyl nucleotide binding
S. incanum MM577	SMEL_011g376390.1	Cc-nbs-lrr, resistance protein	MF	GO:0030554	adenyl nucleotide binding
S. incanum MM577	SMEL_011g376400.1	Nbs-lrr, resistance protein	MF	GO:0030554	adenyl nucleotide binding
S. incanum MM577	SMEL_011g376430.1	No annotation	MF	GO:0030554	adenyl nucleotide binding
S. incanum MM577	SMEL_011g376900.1	Receptor like kinase, RLK	MF	GO:0030554	adenyl nucleotide binding
S. incanum MM577	SMEL_011g378460.1	Cc-nbs-lrr, resistance protein	MF	GO:0030554	adenyl nucleotide binding
S. incanum MM577	SMEL_011g378630.1	Cc-nbs-lrr, resistance protein	MF	GO:0030554	adenyl nucleotide binding
S. incanum MM577	SMEL_011g378690.1	Receptor like kinase, RLK	MF	GO:0030554	adenyl nucleotide binding
S. incanum MM577	SMEL_011g378740.1	Kinase family protein	MF	GO:0030554	adenyl nucleotide binding
S. incanum MM577	SMEL_011g378760.1	Receptor like kinase, RLK	MF	GO:0030554	adenyl nucleotide binding
S. incanum MM577	SMEL_011g378770.1	Receptor like kinase, RLK	MF	GO:0030554	adenyl nucleotide binding
S. incanum MM577	SMEL_011g378890.1	Receptor like kinase, RLK	MF	GO:0030554	adenyl nucleotide binding
S. incanum MM577	SMEL_011g379720.1	Calcium-dependent protein kinase 2	MF	GO:0030554	adenyl nucleotide binding
S. incanum MM577	SMEL_012g380770.1	Receptor like kinase, RLK	MF	GO:0030554	adenyl nucleotide binding
S. incanum MM577	SMEL_012g381110.1	Ankyrin repeat domain-containing protein 1	MF	GO:0030554	adenyl nucleotide binding
S. incanum MM577	SMEL_012g381240.1	No annotation	MF	GO:0030554	adenyl nucleotide binding
S. incanum MM577	SMEL_012g382230.1	Nbs, resistance protein fragment	MF	GO:0030554	adenyl nucleotide binding
S. incanum MM577	SMEL_012g383080.1	ATP synthase subunit alpha, chloroplastic	MF	GO:0030554	adenyl nucleotide binding
S. incanum MM577	SMEL_012g383930.1	Cc-nbs-lrr, resistance protein	MF	GO:0030554	adenyl nucleotide binding
S. incanum MM577	SMEL_012g384040.1	Kinesin like protein	MF	GO:0030554	adenyl nucleotide binding
S. incanum MM577	SMEL_012g385000.1	Receptor like kinase, RLK	MF	GO:0030554	adenyl nucleotide binding
S. incanum MM577	SMEL_012g385590.1	Primary amine oxidase	MF	GO:0030554	adenyl nucleotide binding
S. incanum MM577	SMEL_012g386760.1	Heat shock 70 kDa protein 7, chloroplastic	MF	GO:0030554	adenyl nucleotide binding
S. incanum MM577	SMEL_012g386790.1	Receptor like kinase, RLK	MF	GO:0030554	adenyl nucleotide binding
S. incanum MM577	SMEL_012g387370.1	No annotation	MF	GO:0030554	adenyl nucleotide binding
S. incanum MM577	SMEL_012g387420.1	Ycf2	MF	GO:0030554	adenyl nucleotide binding
S. incanum MM577	SMEL_012g387790.1	Cc-nbs-lrr, resistance protein	MF	GO:0030554	adenyl nucleotide binding
S. incanum MM577	SMEL_012g387810.1	Cc-nbs-lrr, resistance protein	MF	GO:0030554	adenyl nucleotide binding
S. incanum MM577	SMEL_012g388470.1	Ycf2	MF	GO:0030554	adenyl nucleotide binding
S. incanum MM577	SMEL_012g389540.1	No annotation	MF	GO:0030554	adenyl nucleotide binding
S. incanum MM577	SMEL_012g391070.1	Cc-nbs-lrr, resistance protein	MF	GO:0030554	adenyl nucleotide binding
S. incanum MM577	SMEL_012g391660.1	Tir-nbs-lrr, resistance protein	MF	GO:0030554	adenyl nucleotide binding
S. incanum MM577	SMEL_012g391880.1	Multidrug resistance protein ABC transporter family	MF	GO:0030554	adenyl nucleotide binding
S. incanum MM577	SMEL_012g392110.1	Hexokinase 6	MF	GO:0030554	adenyl nucleotide binding
S. incanum MM577	SMEL_012g392220.1	No annotation	MF	GO:0030554	adenyl nucleotide binding
S. incanum MM577	SMEL_012g393210.1	Cc-nbs-lrr, resistance protein	MF	GO:0030554	adenyl nucleotide binding
S. incanum MM577	SMEL_012g395150.1	Cc-nbs-lrr, resistance protein	MF	GO:0030554	adenyl nucleotide binding
S. incanum MM577	SMEL_012g395160.1	Cc-nbs-lrr, resistance protein	MF	GO:0030554	adenyl nucleotide binding
S. incanum MM577	SMEL_012g395490.1	Chaperone protein dnaj	MF	GO:0030554	adenyl nucleotide binding
S. incanum MM577	SMEL_012g395710.1	Cc-nbs-lrr, resistance protein	MF	GO:0030554	adenyl nucleotide binding
S. incanum MM577	SMEL_012g396150.1	Cc-nbs-lrr, resistance protein	MF	GO:0030554	adenyl nucleotide binding
S. incanum MM577	SMEL_012g396930.1	Lipid A export ATP-binding_permease protein msbA	MF	GO:0030554	adenyl nucleotide binding
S. incanum MM577	SMEL_012g397160.1	tRNA(Ile)-lysidine synthase	MF	GO:0030554	adenyl nucleotide binding
S. incanum MM577	SMEL_012g397850.1	Holliday junction ATP-dependent DNA helicase ruvB	MF	GO:0030554	adenyl nucleotide binding
S. incanum MM577	SMEL_001g140940.1	Photosystem II CP43 reaction center protein	MF	GO:0045156	electron transporter, transferring elect...
S. incanum MM577	SMEL_001g144540.1	Photosystem Q(B) protein	MF	GO:0045156	electron transporter, transferring elect...
S. incanum MM577	SMEL_002g158360.1	Photosystem II D2 protein	MF	GO:0045156	electron transporter, transferring elect...
S. incanum MM577	SMEL_002g159210.1	Ycf2	MF	GO:0045156	electron transporter, transferring elect...
S. incanum MM577	SMEL_003g176070.1	Protein VAC14 homolog	MF	GO:0045156	electron transporter, transferring elect...
S. incanum MM577	SMEL_003g176830.1	Photosystem II D2 protein	MF	GO:0045156	electron transporter, transferring elect...
S. incanum MM577	SMEL_003g177370.1	Photosystem II D2 protein	MF	GO:0045156	electron transporter, transferring elect...
S. incanum MM577	SMEL_005g233410.1	Photosystem II D2 protein	MF	GO:0045156	electron transporter, transferring elect...
S. incanum MM577	SMEL_007g283120.1	Photosystem II D2 protein	MF	GO:0045156	electron transporter, transferring elect...
S. incanum MM577	SMEL_007g284980.1	Photosystem II D2 protein	MF	GO:0045156	electron transporter, transferring elect...
S. incanum MM577	SMEL_012g383090.1	Photosystem II D2 protein	MF	GO:0045156	electron transporter, transferring elect...
S. incanum MM577	SMEL_012g387760.1	Photosystem Q(B) protein	MF	GO:0045156	electron transporter, transferring elect...
S. incanum MM577	SMEL_001g120740.1	UDP-glucuronosyltransferase	MF	GO:0016758	transferase activity, transferring hexos...
S. incanum MM577	SMEL_001g123010.1	No annotation	MF	GO:0016758	transferase activity, transferring hexos...
S. incanum MM577	SMEL_001g134500.1	Xyloglucan endotransglucosylase_hydrolase 14	MF	GO:0016758	transferase activity, transferring hexos...
S. incanum MM577	SMEL_001g134620.1	Glucan synthase like 3	MF	GO:0016758	transferase activity, transferring hexos...
S. incanum MM577	SMEL_001g135020.1	Cellulose synthase	MF	GO:0016758	transferase activity, transferring hexos...
S. incanum MM577	SMEL_001g138380.1	No annotation	MF	GO:0016758	transferase activity, transferring hexos...
S. incanum MM577	SMEL_001g140290.1	UDP-glucosyltransferase	MF	GO:0016758	transferase activity, transferring hexos...
S. incanum MM577	SMEL_002g159260.1	No annotation	MF	GO:0016758	transferase activity, transferring hexos...
S. incanum MM577	SMEL_002g159530.1	No annotation	MF	GO:0016758	transferase activity, transferring hexos...
S. incanum MM577	SMEL_002g163270.1	No annotation	MF	GO:0016758	transferase activity, transferring hexos...
S. incanum MM577	SMEL_002g164910.1	Starch synthase 2, chloroplastic/amyloplastic	MF	GO:0016758	transferase activity, transferring hexos...
S. incanum MM577	SMEL_002g166130.1	No annotation	MF	GO:0016758	transferase activity, transferring hexos...
S. incanum MM577	SMEL_003g195760.1	No annotation	MF	GO:0016758	transferase activity, transferring hexos...
S. incanum MM577	SMEL_004g202370.1	No annotation	MF	GO:0016758	transferase activity, transferring hexos...
S. incanum MM577	SMEL_004g204320.1	No annotation	MF	GO:0016758	transferase activity, transferring hexos...
S. incanum MM577	SMEL_004g213720.1	Sterol 3-beta-glucosyltransferase	MF	GO:0016758	transferase activity, transferring hexos...
S. incanum MM577	SMEL_004g215830.1	No annotation	MF	GO:0016758	transferase activity, transferring hexos...
S. incanum MM577	SMEL_004g216290.1	UDP-glucuronosyltransferase	MF	GO:0016758	transferase activity, transferring hexos...
S. incanum MM577	SMEL_004g216310.1	UDP-glucuronosyltransferase	MF	GO:0016758	transferase activity, transferring hexos...
S. incanum MM577	SMEL_004g216320.1	UDP-glucuronosyltransferase	MF	GO:0016758	transferase activity, transferring hexos...
S. incanum MM577	SMEL_004g219690.1	No annotation	MF	GO:0016758	transferase activity, transferring hexos...
S. incanum MM577	SMEL_004g223280.1	Dolichyl-diphosphooligosaccharide--protein glycosyltransferase subunit 1	MF	GO:0016758	transferase activity, transferring hexos...
S. incanum MM577	SMEL_004g223510.1	No annotation	MF	GO:0016758	transferase activity, transferring hexos...
S. incanum MM577	SMEL_005g225570.1	No annotation	MF	GO:0016758	transferase activity, transferring hexos...
S. incanum MM577	SMEL_005g227240.1	UDP-glucosyltransferase family 1 protein	MF	GO:0016758	transferase activity, transferring hexos...
S. incanum MM577	SMEL_005g227520.1	Glucosyltransferase	MF	GO:0016758	transferase activity, transferring hexos...
S. incanum MM577	SMEL_005g228190.1	No annotation	MF	GO:0016758	transferase activity, transferring hexos...
S. incanum MM577	SMEL_005g231660.1	No annotation	MF	GO:0016758	transferase activity, transferring hexos...
S. incanum MM577	SMEL_005g234690.1	Anthocyanidin 3-O-glucosyltransferase	MF	GO:0016758	transferase activity, transferring hexos...
S. incanum MM577	SMEL_005g235690.1	UDP-glucuronosyltransferase	MF	GO:0016758	transferase activity, transferring hexos...
S. incanum MM577	SMEL_005g236720.1	UDP-glucosyltransferase family 1 protein	MF	GO:0016758	transferase activity, transferring hexos...
S. incanum MM577	SMEL_005g240320.1	No annotation	MF	GO:0016758	transferase activity, transferring hexos...
S. incanum MM577	SMEL_006g245400.1	UDP-glucosyltransferase family 1 protein	MF	GO:0016758	transferase activity, transferring hexos...
S. incanum MM577	SMEL_006g247430.1	UDP-glucosyltransferase	MF	GO:0016758	transferase activity, transferring hexos...
S. incanum MM577	SMEL_006g257260.1	Fucosyltransferase 7	MF	GO:0016758	transferase activity, transferring hexos...
S. incanum MM577	SMEL_006g257850.1	UDP-glucosyltransferase	MF	GO:0016758	transferase activity, transferring hexos...
S. incanum MM577	SMEL_006g263190.1	Beta-1 3-galactosyltransferase-like protein	MF	GO:0016758	transferase activity, transferring hexos...
S. incanum MM577	SMEL_007g279790.1	UDP-glucosyltransferase	MF	GO:0016758	transferase activity, transferring hexos...
S. incanum MM577	SMEL_007g285070.1	No annotation	MF	GO:0016758	transferase activity, transferring hexos...
S. incanum MM577	SMEL_007g290290.1	Glucan synthase like 1	MF	GO:0016758	transferase activity, transferring hexos...
S. incanum MM577	SMEL_008g300690.1	No annotation	MF	GO:0016758	transferase activity, transferring hexos...
S. incanum MM577	SMEL_008g302060.1	No annotation	MF	GO:0016758	transferase activity, transferring hexos...
S. incanum MM577	SMEL_008g304320.1	UDP-glucosyltransferase 1	MF	GO:0016758	transferase activity, transferring hexos...
S. incanum MM577	SMEL_008g304820.1	No annotation	MF	GO:0016758	transferase activity, transferring hexos...
S. incanum MM577	SMEL_009g321280.1	Xyloglucan endotransglucosylase_hydrolase 12	MF	GO:0016758	transferase activity, transferring hexos...
S. incanum MM577	SMEL_009g321550.1	No annotation	MF	GO:0016758	transferase activity, transferring hexos...
S. incanum MM577	SMEL_009g322900.1	BED zinc finger	MF	GO:0016758	transferase activity, transferring hexos...
S. incanum MM577	SMEL_009g335870.1	UDP-glucosyltransferase family 1 protein	MF	GO:0016758	transferase activity, transferring hexos...
S. incanum MM577	SMEL_010g336490.1	No annotation	MF	GO:0016758	transferase activity, transferring hexos...
S. incanum MM577	SMEL_010g337170.1	No annotation	MF	GO:0016758	transferase activity, transferring hexos...
S. incanum MM577	SMEL_010g340790.1	UDP-glucosyltransferase	MF	GO:0016758	transferase activity, transferring hexos...
S. incanum MM577	SMEL_010g341490.1	No annotation	MF	GO:0016758	transferase activity, transferring hexos...
S. incanum MM577	SMEL_010g355550.1	No annotation	MF	GO:0016758	transferase activity, transferring hexos...
S. incanum MM577	SMEL_010g356160.1	UDP-glucosyltransferase	MF	GO:0016758	transferase activity, transferring hexos...
S. incanum MM577	SMEL_010g359880.1	UDP-glucosyltransferase HvUGT5876	MF	GO:0016758	transferase activity, transferring hexos...
S. incanum MM577	SMEL_010g359890.1	Glucosyltransferase-5	MF	GO:0016758	transferase activity, transferring hexos...
S. incanum MM577	SMEL_011g362360.1	No annotation	MF	GO:0016758	transferase activity, transferring hexos...
S. incanum MM577	SMEL_011g364060.1	No annotation	MF	GO:0016758	transferase activity, transferring hexos...
S. incanum MM577	SMEL_011g364080.1	No annotation	MF	GO:0016758	transferase activity, transferring hexos...
S. incanum MM577	SMEL_011g364090.1	No annotation	MF	GO:0016758	transferase activity, transferring hexos...
S. incanum MM577	SMEL_011g366440.1	UDP-glucosyltransferase	MF	GO:0016758	transferase activity, transferring hexos...
S. incanum MM577	SMEL_011g366450.1	UDP-glucosyltransferase	MF	GO:0016758	transferase activity, transferring hexos...
S. incanum MM577	SMEL_011g366540.1	UDP-glucosyltransferase	MF	GO:0016758	transferase activity, transferring hexos...
S. incanum MM577	SMEL_011g372420.1	No annotation	MF	GO:0016758	transferase activity, transferring hexos...
S. incanum MM577	SMEL_011g373570.1	UDP-glucosyltransferase	MF	GO:0016758	transferase activity, transferring hexos...
S. incanum MM577	SMEL_011g373720.1	UDP-glucosyltransferase	MF	GO:0016758	transferase activity, transferring hexos...
S. incanum MM577	SMEL_011g374100.1	Glucosyltransferase	MF	GO:0016758	transferase activity, transferring hexos...
S. incanum MM577	SMEL_011g375300.1	N-acetylglucosaminyl transferase component Gpi1	MF	GO:0016758	transferase activity, transferring hexos...
S. incanum MM577	SMEL_012g380890.1	Dolichyl-diphosphooligosaccharide--protein glycosyltransferase subunit STT3A	MF	GO:0016758	transferase activity, transferring hexos...
S. incanum MM577	SMEL_012g397480.1	UDP-glucosyltransferase	MF	GO:0016758	transferase activity, transferring hexos...
S. incanum MM577	SMEL_001g141810.1	RNA-dependent RNA polymerase	MF	GO:0034062	5'-3' RNA polymerase activity
S. incanum MM577	SMEL_001g148340.1	RNA-dependent RNA polymerase	MF	GO:0034062	5'-3' RNA polymerase activity
S. incanum MM577	SMEL_002g160870.1	RNA-dependent RNA polymerase	MF	GO:0034062	5'-3' RNA polymerase activity
S. incanum MM577	SMEL_002g166050.1	DNA-directed RNA polymerase	MF	GO:0034062	5'-3' RNA polymerase activity
S. incanum MM577	SMEL_003g174850.1	RNA-dependent RNA polymerase	MF	GO:0034062	5'-3' RNA polymerase activity
S. incanum MM577	SMEL_004g208680.1	DNA-directed RNA polymerase subunit alpha	MF	GO:0034062	5'-3' RNA polymerase activity
S. incanum MM577	SMEL_004g211450.1	DNA-directed RNA polymerase subunit beta''	MF	GO:0034062	5'-3' RNA polymerase activity
S. incanum MM577	SMEL_005g226240.1	DNA-directed RNA polymerase III subunit RPC4	MF	GO:0034062	5'-3' RNA polymerase activity
S. incanum MM577	SMEL_005g233420.1	DNA-directed RNA polymerase subunit beta''	MF	GO:0034062	5'-3' RNA polymerase activity
S. incanum MM577	SMEL_006g245390.1	DNA-directed RNA polymerase subunit beta''	MF	GO:0034062	5'-3' RNA polymerase activity
S. incanum MM577	SMEL_006g255350.1	DNA-directed RNA polymerase subunit beta''	MF	GO:0034062	5'-3' RNA polymerase activity
S. incanum MM577	SMEL_007g280120.1	Unknown protein	MF	GO:0034062	5'-3' RNA polymerase activity
S. incanum MM577	SMEL_007g284050.1	DNA-directed RNA polymerase subunit beta'	MF	GO:0034062	5'-3' RNA polymerase activity
S. incanum MM577	SMEL_007g284420.1	DNA-directed RNA polymerase subunit beta	MF	GO:0034062	5'-3' RNA polymerase activity
S. incanum MM577	SMEL_007g285060.1	RNA-dependent RNA polymerase	MF	GO:0034062	5'-3' RNA polymerase activity
S. incanum MM577	SMEL_007g295250.1	DNA-directed RNA polymerase subunit beta	MF	GO:0034062	5'-3' RNA polymerase activity
S. incanum MM577	SMEL_008g310810.1	RNA-dependent RNA polymerase	MF	GO:0034062	5'-3' RNA polymerase activity
S. incanum MM577	SMEL_008g313390.1	DNA-directed RNA polymerase III subunit rpc6	MF	GO:0034062	5'-3' RNA polymerase activity
S. incanum MM577	SMEL_008g313580.1	RNA-dependent RNA polymerase	MF	GO:0034062	5'-3' RNA polymerase activity
S. incanum MM577	SMEL_008g313700.1	DNA-directed RNA polymerase	MF	GO:0034062	5'-3' RNA polymerase activity
S. incanum MM577	SMEL_008g315930.1	DNA-directed RNA polymerase subunit beta	MF	GO:0034062	5'-3' RNA polymerase activity
S. incanum MM577	SMEL_011g362820.1	DNA-directed RNA polymerase	MF	GO:0034062	5'-3' RNA polymerase activity
S. incanum MM577	SMEL_011g375960.1	DNA-directed RNA polymerase subunit beta	MF	GO:0034062	5'-3' RNA polymerase activity
S. incanum MM577	SMEL_012g385960.1	DNA-directed RNA polymerase subunit beta	MF	GO:0034062	5'-3' RNA polymerase activity
S. incanum MM577	SMEL_012g387240.1	DNA-directed RNA polymerase subunit beta	MF	GO:0034062	5'-3' RNA polymerase activity
S. incanum MM577	SMEL_001g140100.1	Ulp1 protease family C-terminal catalytic domain containing protein	MF	GO:0008234	cysteine-type peptidase activity
S. incanum MM577	SMEL_001g140910.1	Sentrin-specific protease 2	MF	GO:0008234	cysteine-type peptidase activity
S. incanum MM577	SMEL_002g155380.1	Sentrin-specific protease 7	MF	GO:0008234	cysteine-type peptidase activity
S. incanum MM577	SMEL_003g182310.1	Ulp1 protease family C-terminal catalytic domain containing protein	MF	GO:0008234	cysteine-type peptidase activity
S. incanum MM577	SMEL_004g203480.1	Ulp1 protease family C-terminal catalytic domain containing protein	MF	GO:0008234	cysteine-type peptidase activity
S. incanum MM577	SMEL_004g210260.1	Sentrin specific protease 1b	MF	GO:0008234	cysteine-type peptidase activity
S. incanum MM577	SMEL_004g217010.1	Ubiquitin carboxyl-terminal hydrolase family protein	MF	GO:0008234	cysteine-type peptidase activity
S. incanum MM577	SMEL_005g228160.1	Ubiquitin carboxyl-terminal hydrolase	MF	GO:0008234	cysteine-type peptidase activity
S. incanum MM577	SMEL_005g239830.1	Ubiquitin carboxyl-terminal hydrolase family protein	MF	GO:0008234	cysteine-type peptidase activity
S. incanum MM577	SMEL_006g247080.1	Ulp1 protease family C-terminal catalytic domain containing protein	MF	GO:0008234	cysteine-type peptidase activity
S. incanum MM577	SMEL_007g278070.1	No annotation	MF	GO:0008234	cysteine-type peptidase activity
S. incanum MM577	SMEL_007g279960.1	Ulp1 protease family C-terminal catalytic domain containing protein	MF	GO:0008234	cysteine-type peptidase activity
S. incanum MM577	SMEL_007g283550.1	Ulp1 protease family C-terminal catalytic domain containing protein	MF	GO:0008234	cysteine-type peptidase activity
S. incanum MM577	SMEL_008g301980.1	Ubiquitin carboxyl-terminal hydrolase	MF	GO:0008234	cysteine-type peptidase activity
S. incanum MM577	SMEL_008g315540.1	Ubiquitin carboxyl-terminal hydrolase isozyme L3	MF	GO:0008234	cysteine-type peptidase activity
S. incanum MM577	SMEL_009g326390.1	Ulp1 protease family C-terminal catalytic domain containing protein	MF	GO:0008234	cysteine-type peptidase activity
S. incanum MM577	SMEL_009g326940.1	Ulp1 protease family C-terminal catalytic domain containing protein	MF	GO:0008234	cysteine-type peptidase activity
S. incanum MM577	SMEL_010g361860.1	Ubiquitin carboxyl-terminal hydrolase family protein expressed	MF	GO:0008234	cysteine-type peptidase activity
S. incanum MM577	SMEL_011g368620.1	Ulp1 protease family C-terminal catalytic domain containing protein	MF	GO:0008234	cysteine-type peptidase activity
S. incanum MM577	SMEL_011g371060.1	Ulp1 protease family C-terminal catalytic domain containing protein	MF	GO:0008234	cysteine-type peptidase activity
S. incanum MM577	SMEL_012g383290.1	Ulp1 protease family C-terminal catalytic domain containing protein	MF	GO:0008234	cysteine-type peptidase activity
S. incanum MM577	SMEL_012g386310.1	Ulp1 protease family C-terminal catalytic domain containing protein	MF	GO:0008234	cysteine-type peptidase activity
S. incanum MM577	SMEL_012g395630.1	Ubiquitin carboxyl-terminal hydrolase family protein expressed	MF	GO:0008234	cysteine-type peptidase activity
S. incanum MM577	SMEL_001g130360.1	Cytochrome P450	MF	GO:0046906	tetrapyrrole binding
S. incanum MM577	SMEL_001g140940.1	Photosystem II CP43 reaction center protein	MF	GO:0046906	tetrapyrrole binding
S. incanum MM577	SMEL_001g145450.1	Photosystem II CP43 reaction center protein	MF	GO:0046906	tetrapyrrole binding
S. incanum MM577	SMEL_001g146720.1	Cytochrome P450	MF	GO:0046906	tetrapyrrole binding
S. incanum MM577	SMEL_001g146910.1	Photosystem II CP47 reaction center protein	MF	GO:0046906	tetrapyrrole binding
S. incanum MM577	SMEL_001g148030.1	Cytochrome P450	MF	GO:0046906	tetrapyrrole binding
S. incanum MM577	SMEL_001g148430.1	Cytochrome P450	MF	GO:0046906	tetrapyrrole binding
S. incanum MM577	SMEL_001g150090.1	Cytochrome P450	MF	GO:0046906	tetrapyrrole binding
S. incanum MM577	SMEL_001g150110.1	Cytochrome P450	MF	GO:0046906	tetrapyrrole binding
S. incanum MM577	SMEL_001g150140.1	Cytochrome P450	MF	GO:0046906	tetrapyrrole binding
S. incanum MM577	SMEL_001g152710.1	Peroxidase	MF	GO:0046906	tetrapyrrole binding
S. incanum MM577	SMEL_001g152720.1	Peroxidase	MF	GO:0046906	tetrapyrrole binding
S. incanum MM577	SMEL_002g158360.1	Photosystem II D2 protein	MF	GO:0046906	tetrapyrrole binding
S. incanum MM577	SMEL_002g161780.1	Cytochrome P450	MF	GO:0046906	tetrapyrrole binding
S. incanum MM577	SMEL_002g162230.1	Photosystem II CP47 reaction center protein	MF	GO:0046906	tetrapyrrole binding
S. incanum MM577	SMEL_003g171370.1	Cytochrome P450	MF	GO:0046906	tetrapyrrole binding
S. incanum MM577	SMEL_003g172190.1	Peroxidase	MF	GO:0046906	tetrapyrrole binding
S. incanum MM577	SMEL_003g177970.1	Cytochrome P450	MF	GO:0046906	tetrapyrrole binding
S. incanum MM577	SMEL_003g189220.1	Cytochrome P450	MF	GO:0046906	tetrapyrrole binding
S. incanum MM577	SMEL_003g189270.1	Cytochrome P450 pseudogene	MF	GO:0046906	tetrapyrrole binding
S. incanum MM577	SMEL_003g189310.1	Cytochrome P450	MF	GO:0046906	tetrapyrrole binding
S. incanum MM577	SMEL_003g195990.1	Alpha-dioxygenase 2	MF	GO:0046906	tetrapyrrole binding
S. incanum MM577	SMEL_003g196400.1	Cytochrome P450	MF	GO:0046906	tetrapyrrole binding
S. incanum MM577	SMEL_003g196410.1	Cytochrome P450	MF	GO:0046906	tetrapyrrole binding
S. incanum MM577	SMEL_004g203250.1	Cytochrome P450	MF	GO:0046906	tetrapyrrole binding
S. incanum MM577	SMEL_004g203380.1	9-divinyl ether synthase	MF	GO:0046906	tetrapyrrole binding
S. incanum MM577	SMEL_004g211830.1	Cytochrome P450	MF	GO:0046906	tetrapyrrole binding
S. incanum MM577	SMEL_004g219020.1	Cytochrome P450	MF	GO:0046906	tetrapyrrole binding
S. incanum MM577	SMEL_004g220320.1	Cytochrome P450	MF	GO:0046906	tetrapyrrole binding
S. incanum MM577	SMEL_004g220340.1	Cytochrome P450	MF	GO:0046906	tetrapyrrole binding
S. incanum MM577	SMEL_004g223080.1	Catalase	MF	GO:0046906	tetrapyrrole binding
S. incanum MM577	SMEL_005g225230.1	Peroxidase	MF	GO:0046906	tetrapyrrole binding
S. incanum MM577	SMEL_005g227970.1	Cytochrome P450	MF	GO:0046906	tetrapyrrole binding
S. incanum MM577	SMEL_005g233240.1	Cytochrome P450	MF	GO:0046906	tetrapyrrole binding
S. incanum MM577	SMEL_005g233370.1	Ribulose bisphosphate carboxylase large chain	MF	GO:0046906	tetrapyrrole binding
S. incanum MM577	SMEL_005g233410.1	Photosystem II D2 protein	MF	GO:0046906	tetrapyrrole binding
S. incanum MM577	SMEL_005g234910.1	Cytochrome P450	MF	GO:0046906	tetrapyrrole binding
S. incanum MM577	SMEL_005g236570.1	Cytochrome P450	MF	GO:0046906	tetrapyrrole binding
S. incanum MM577	SMEL_006g251790.1	Cytochrome P450	MF	GO:0046906	tetrapyrrole binding
S. incanum MM577	SMEL_006g259050.1	Cytochrome P450	MF	GO:0046906	tetrapyrrole binding
S. incanum MM577	SMEL_006g259060.1	Cytochrome P450	MF	GO:0046906	tetrapyrrole binding
S. incanum MM577	SMEL_006g267880.1	Cytochrome P450	MF	GO:0046906	tetrapyrrole binding
S. incanum MM577	SMEL_006g268950.1	Peroxidase 3	MF	GO:0046906	tetrapyrrole binding
S. incanum MM577	SMEL_006g269680.1	Cytochrome P450	MF	GO:0046906	tetrapyrrole binding
S. incanum MM577	SMEL_006g269690.1	Cytochrome P450	MF	GO:0046906	tetrapyrrole binding
S. incanum MM577	SMEL_007g278740.1	Cytochrome P450	MF	GO:0046906	tetrapyrrole binding
S. incanum MM577	SMEL_007g279450.1	cytochrome P450	MF	GO:0046906	tetrapyrrole binding
S. incanum MM577	SMEL_007g283690.1	Cytochrome c oxidase subunit 1	MF	GO:0046906	tetrapyrrole binding
S. incanum MM577	SMEL_007g291440.1	Cytochrome P450	MF	GO:0046906	tetrapyrrole binding
S. incanum MM577	SMEL_007g291630.1	Cytochrome P450	MF	GO:0046906	tetrapyrrole binding
S. incanum MM577	SMEL_007g294370.1	Cytochrome P450	MF	GO:0046906	tetrapyrrole binding
S. incanum MM577	SMEL_008g297560.1	Cytochrome P450	MF	GO:0046906	tetrapyrrole binding
S. incanum MM577	SMEL_008g301780.1	Peroxidase family protein	MF	GO:0046906	tetrapyrrole binding
S. incanum MM577	SMEL_008g302640.1	Cytochrome P450 ent-kaurenoic acid oxidase	MF	GO:0046906	tetrapyrrole binding
S. incanum MM577	SMEL_008g304650.1	No annotation	MF	GO:0046906	tetrapyrrole binding
S. incanum MM577	SMEL_008g305560.1	Cytochrome P450	MF	GO:0046906	tetrapyrrole binding
S. incanum MM577	SMEL_008g310440.1	Globin	MF	GO:0046906	tetrapyrrole binding
S. incanum MM577	SMEL_008g317370.1	Cytochrome P450	MF	GO:0046906	tetrapyrrole binding
S. incanum MM577	SMEL_008g317380.1	Cytochrome P450	MF	GO:0046906	tetrapyrrole binding
S. incanum MM577	SMEL_008g317390.1	cytochrome P450	MF	GO:0046906	tetrapyrrole binding
S. incanum MM577	SMEL_008g318480.1	Cytochrome P450	MF	GO:0046906	tetrapyrrole binding
S. incanum MM577	SMEL_009g322240.1	Ascorbate peroxidase	MF	GO:0046906	tetrapyrrole binding
S. incanum MM577	SMEL_009g325570.1	Photosystem II CP43 reaction center protein	MF	GO:0046906	tetrapyrrole binding
S. incanum MM577	SMEL_009g332840.1	Alpha-dioxygenase	MF	GO:0046906	tetrapyrrole binding
S. incanum MM577	SMEL_009g334730.1	Cytochrome P450	MF	GO:0046906	tetrapyrrole binding
S. incanum MM577	SMEL_009g335090.1	Cytochrome P450	MF	GO:0046906	tetrapyrrole binding
S. incanum MM577	SMEL_009g335100.1	Cytochrome P450	MF	GO:0046906	tetrapyrrole binding
S. incanum MM577	SMEL_009g335120.1	Cytochrome P450	MF	GO:0046906	tetrapyrrole binding
S. incanum MM577	SMEL_009g335800.1	Cytochrome P450	MF	GO:0046906	tetrapyrrole binding
S. incanum MM577	SMEL_010g339320.1	Peroxidase 27	MF	GO:0046906	tetrapyrrole binding
S. incanum MM577	SMEL_010g339330.1	Peroxidase 27	MF	GO:0046906	tetrapyrrole binding
S. incanum MM577	SMEL_010g341010.1	Peroxidase 27	MF	GO:0046906	tetrapyrrole binding
S. incanum MM577	SMEL_010g344710.1	Cytochrome P450	MF	GO:0046906	tetrapyrrole binding
S. incanum MM577	SMEL_010g345500.1	Photosystem II CP43 reaction center protein	MF	GO:0046906	tetrapyrrole binding
S. incanum MM577	SMEL_010g358560.1	Cytochrome P450	MF	GO:0046906	tetrapyrrole binding
S. incanum MM577	SMEL_010g359140.1	Peroxidase	MF	GO:0046906	tetrapyrrole binding
S. incanum MM577	SMEL_010g361080.1	cytochrome P450	MF	GO:0046906	tetrapyrrole binding
S. incanum MM577	SMEL_010g361100.1	Cytochrome P450	MF	GO:0046906	tetrapyrrole binding
S. incanum MM577	SMEL_011g365870.1	Cytochrome P450	MF	GO:0046906	tetrapyrrole binding
S. incanum MM577	SMEL_011g366360.1	Cytochrome P450	MF	GO:0046906	tetrapyrrole binding
S. incanum MM577	SMEL_011g368510.1	Cytochrome P450	MF	GO:0046906	tetrapyrrole binding
S. incanum MM577	SMEL_011g368540.1	Cytochrome P450	MF	GO:0046906	tetrapyrrole binding
S. incanum MM577	SMEL_011g368970.1	Cytochrome P450	MF	GO:0046906	tetrapyrrole binding
S. incanum MM577	SMEL_011g375060.1	Peroxidase 2	MF	GO:0046906	tetrapyrrole binding
S. incanum MM577	SMEL_012g391170.1	Cytochrome P450	MF	GO:0046906	tetrapyrrole binding
S. incanum MM577	SMEL_012g392500.1	Cytochrome P450	MF	GO:0046906	tetrapyrrole binding
S. incanum MM577	SMEL_001g121440.1	(E)-beta-ocimene synthase	MF	GO:0000287	magnesium ion binding
S. incanum MM577	SMEL_001g127660.1	Phospholipid-transporting ATPase	MF	GO:0000287	magnesium ion binding
S. incanum MM577	SMEL_001g143080.1	Germacrene-D synthase	MF	GO:0000287	magnesium ion binding
S. incanum MM577	SMEL_001g146060.1	Ribulose bisphosphate carboxylase large chain	MF	GO:0000287	magnesium ion binding
S. incanum MM577	SMEL_002g162000.1	Ribulose bisphosphate carboxylase large chain	MF	GO:0000287	magnesium ion binding
S. incanum MM577	SMEL_003g173850.1	Unknown protein	MF	GO:0000287	magnesium ion binding
S. incanum MM577	SMEL_003g183410.1	Beta-ocimene synthase	MF	GO:0000287	magnesium ion binding
S. incanum MM577	SMEL_004g204560.1	No annotation	MF	GO:0000287	magnesium ion binding
S. incanum MM577	SMEL_004g204910.1	Acetyl-coenzyme A carboxylase carboxyl transferase subunit beta, chloroplastic	MF	GO:0000287	magnesium ion binding
S. incanum MM577	SMEL_004g205520.1	No annotation	MF	GO:0000287	magnesium ion binding
S. incanum MM577	SMEL_005g233370.1	Ribulose bisphosphate carboxylase large chain	MF	GO:0000287	magnesium ion binding
S. incanum MM577	SMEL_006g255660.1	Germacrene-D synthase	MF	GO:0000287	magnesium ion binding
S. incanum MM577	SMEL_007g285290.1	Alpha-humulene_(-)-(E)-beta-caryophyllene synthase	MF	GO:0000287	magnesium ion binding
S. incanum MM577	SMEL_007g288210.1	Germacrene-D synthase	MF	GO:0000287	magnesium ion binding
S. incanum MM577	SMEL_007g289660.1	Ribulose bisphosphate carboxylase large chain	MF	GO:0000287	magnesium ion binding
S. incanum MM577	SMEL_009g335950.1	(-)-germacrene D synthase	MF	GO:0000287	magnesium ion binding
S. incanum MM577	SMEL_010g349000.1	Phospholipid-transporting ATPase	MF	GO:0000287	magnesium ion binding
S. incanum MM577	SMEL_010g354260.1	Phospholipid-transporting ATPase	MF	GO:0000287	magnesium ion binding
S. incanum MM577	SMEL_010g355110.1	Enolase	MF	GO:0000287	magnesium ion binding
S. incanum MM577	SMEL_011g362270.1	Isocitrate dehydrogenase	MF	GO:0000287	magnesium ion binding
S. incanum MM577	SMEL_011g365810.1	Alpha-humulene_(-)-(E)-beta-caryophyllene synthase	MF	GO:0000287	magnesium ion binding
S. incanum MM577	SMEL_011g367720.1	Ribulose bisphosphate carboxylase large chain	MF	GO:0000287	magnesium ion binding
S. incanum MM577	SMEL_011g371070.1	Phosphoglucomutase, cytoplasmic	MF	GO:0000287	magnesium ion binding
S. incanum MM577	SMEL_011g378920.1	Ribulose bisphosphate carboxylase large chain	MF	GO:0000287	magnesium ion binding
S. incanum MM577	SMEL_012g386960.1	Ribulose bisphosphate carboxylase large chain	MF	GO:0000287	magnesium ion binding
S. incanum MM577	SMEL_012g390480.1	Ribulose bisphosphate carboxylase large chain	MF	GO:0000287	magnesium ion binding
S. incanum MM577	SMEL_012g393030.1	No annotation	MF	GO:0000287	magnesium ion binding
S. incanum MM577	SMEL_003g177030.1	No annotation	MF	GO:0016868	intramolecular transferase activity, pho...
S. incanum MM577	SMEL_004g215610.1	2 3-bisphosphoglycerate-dependent phosphoglycerate mutase	MF	GO:0016868	intramolecular transferase activity, pho...
S. incanum MM577	SMEL_005g224440.1	Phosphomannomutase 2	MF	GO:0016868	intramolecular transferase activity, pho...
S. incanum MM577	SMEL_008g303460.1	No annotation	MF	GO:0016868	intramolecular transferase activity, pho...
S. incanum MM577	SMEL_011g371070.1	Phosphoglucomutase, cytoplasmic	MF	GO:0016868	intramolecular transferase activity, pho...
S. incanum MM577	SMEL_008g312020.1	Cryptochrome 3	MF	GO:0003913	DNA photolyase activity
S. incanum MM577	SMEL_008g317550.1	Deoxyribodipyrimidine photo-lyase	MF	GO:0003913	DNA photolyase activity
S. incanum MM577	SMEL_001g121440.1	(E)-beta-ocimene synthase	MF	GO:0010333	terpene synthase activity
S. incanum MM577	SMEL_001g143080.1	Germacrene-D synthase	MF	GO:0010333	terpene synthase activity
S. incanum MM577	SMEL_003g183410.1	Beta-ocimene synthase	MF	GO:0010333	terpene synthase activity
S. incanum MM577	SMEL_004g204560.1	No annotation	MF	GO:0010333	terpene synthase activity
S. incanum MM577	SMEL_004g205520.1	No annotation	MF	GO:0010333	terpene synthase activity
S. incanum MM577	SMEL_006g255660.1	Germacrene-D synthase	MF	GO:0010333	terpene synthase activity
S. incanum MM577	SMEL_007g285290.1	Alpha-humulene_(-)-(E)-beta-caryophyllene synthase	MF	GO:0010333	terpene synthase activity
S. incanum MM577	SMEL_007g288210.1	Germacrene-D synthase	MF	GO:0010333	terpene synthase activity
S. incanum MM577	SMEL_009g335950.1	(-)-germacrene D synthase	MF	GO:0010333	terpene synthase activity
S. incanum MM577	SMEL_011g365810.1	Alpha-humulene_(-)-(E)-beta-caryophyllene synthase	MF	GO:0010333	terpene synthase activity
S. incanum MM577	SMEL_012g393030.1	No annotation	MF	GO:0010333	terpene synthase activity
S. incanum MM577	SMEL_001g115210.1	Dimethylaniline monooxygenase 5	MF	GO:0016705	oxidoreductase activity, acting on paire...
S. incanum MM577	SMEL_001g130360.1	Cytochrome P450	MF	GO:0016705	oxidoreductase activity, acting on paire...
S. incanum MM577	SMEL_001g146720.1	Cytochrome P450	MF	GO:0016705	oxidoreductase activity, acting on paire...
S. incanum MM577	SMEL_001g148030.1	Cytochrome P450	MF	GO:0016705	oxidoreductase activity, acting on paire...
S. incanum MM577	SMEL_001g148430.1	Cytochrome P450	MF	GO:0016705	oxidoreductase activity, acting on paire...
S. incanum MM577	SMEL_001g148440.1	Stearoyl-acyl carrier protein desaturase	MF	GO:0016705	oxidoreductase activity, acting on paire...
S. incanum MM577	SMEL_001g150090.1	Cytochrome P450	MF	GO:0016705	oxidoreductase activity, acting on paire...
S. incanum MM577	SMEL_001g150110.1	Cytochrome P450	MF	GO:0016705	oxidoreductase activity, acting on paire...
S. incanum MM577	SMEL_001g150140.1	Cytochrome P450	MF	GO:0016705	oxidoreductase activity, acting on paire...
S. incanum MM577	SMEL_002g161780.1	Cytochrome P450	MF	GO:0016705	oxidoreductase activity, acting on paire...
S. incanum MM577	SMEL_002g164540.1	Prolyl 4-hydroxylase alpha subunit-like protein	MF	GO:0016705	oxidoreductase activity, acting on paire...
S. incanum MM577	SMEL_003g171370.1	Cytochrome P450	MF	GO:0016705	oxidoreductase activity, acting on paire...
S. incanum MM577	SMEL_003g177970.1	Cytochrome P450	MF	GO:0016705	oxidoreductase activity, acting on paire...
S. incanum MM577	SMEL_003g188860.1	No annotation	MF	GO:0016705	oxidoreductase activity, acting on paire...
S. incanum MM577	SMEL_003g189220.1	Cytochrome P450	MF	GO:0016705	oxidoreductase activity, acting on paire...
S. incanum MM577	SMEL_003g189270.1	Cytochrome P450 pseudogene	MF	GO:0016705	oxidoreductase activity, acting on paire...
S. incanum MM577	SMEL_003g189310.1	Cytochrome P450	MF	GO:0016705	oxidoreductase activity, acting on paire...
S. incanum MM577	SMEL_003g196400.1	Cytochrome P450	MF	GO:0016705	oxidoreductase activity, acting on paire...
S. incanum MM577	SMEL_003g196410.1	Cytochrome P450	MF	GO:0016705	oxidoreductase activity, acting on paire...
S. incanum MM577	SMEL_004g203250.1	Cytochrome P450	MF	GO:0016705	oxidoreductase activity, acting on paire...
S. incanum MM577	SMEL_004g203380.1	9-divinyl ether synthase	MF	GO:0016705	oxidoreductase activity, acting on paire...
S. incanum MM577	SMEL_004g211830.1	Cytochrome P450	MF	GO:0016705	oxidoreductase activity, acting on paire...
S. incanum MM577	SMEL_004g219020.1	Cytochrome P450	MF	GO:0016705	oxidoreductase activity, acting on paire...
S. incanum MM577	SMEL_004g220320.1	Cytochrome P450	MF	GO:0016705	oxidoreductase activity, acting on paire...
S. incanum MM577	SMEL_004g220340.1	Cytochrome P450	MF	GO:0016705	oxidoreductase activity, acting on paire...
S. incanum MM577	SMEL_005g225210.1	Flavin-monooxygenase	MF	GO:0016705	oxidoreductase activity, acting on paire...
S. incanum MM577	SMEL_005g227970.1	Cytochrome P450	MF	GO:0016705	oxidoreductase activity, acting on paire...
S. incanum MM577	SMEL_005g233210.1	No annotation	MF	GO:0016705	oxidoreductase activity, acting on paire...
S. incanum MM577	SMEL_005g233240.1	Cytochrome P450	MF	GO:0016705	oxidoreductase activity, acting on paire...
S. incanum MM577	SMEL_005g234910.1	Cytochrome P450	MF	GO:0016705	oxidoreductase activity, acting on paire...
S. incanum MM577	SMEL_005g236570.1	Cytochrome P450	MF	GO:0016705	oxidoreductase activity, acting on paire...
S. incanum MM577	SMEL_006g251790.1	Cytochrome P450	MF	GO:0016705	oxidoreductase activity, acting on paire...
S. incanum MM577	SMEL_006g259050.1	Cytochrome P450	MF	GO:0016705	oxidoreductase activity, acting on paire...
S. incanum MM577	SMEL_006g259060.1	Cytochrome P450	MF	GO:0016705	oxidoreductase activity, acting on paire...
S. incanum MM577	SMEL_006g267880.1	Cytochrome P450	MF	GO:0016705	oxidoreductase activity, acting on paire...
S. incanum MM577	SMEL_006g269680.1	Cytochrome P450	MF	GO:0016705	oxidoreductase activity, acting on paire...
S. incanum MM577	SMEL_006g269690.1	Cytochrome P450	MF	GO:0016705	oxidoreductase activity, acting on paire...
S. incanum MM577	SMEL_007g278740.1	Cytochrome P450	MF	GO:0016705	oxidoreductase activity, acting on paire...
S. incanum MM577	SMEL_007g279450.1	cytochrome P450	MF	GO:0016705	oxidoreductase activity, acting on paire...
S. incanum MM577	SMEL_007g291440.1	Cytochrome P450	MF	GO:0016705	oxidoreductase activity, acting on paire...
S. incanum MM577	SMEL_007g291630.1	Cytochrome P450	MF	GO:0016705	oxidoreductase activity, acting on paire...
S. incanum MM577	SMEL_007g294370.1	Cytochrome P450	MF	GO:0016705	oxidoreductase activity, acting on paire...
S. incanum MM577	SMEL_008g297560.1	Cytochrome P450	MF	GO:0016705	oxidoreductase activity, acting on paire...
S. incanum MM577	SMEL_008g302640.1	Cytochrome P450 ent-kaurenoic acid oxidase	MF	GO:0016705	oxidoreductase activity, acting on paire...
S. incanum MM577	SMEL_008g305560.1	Cytochrome P450	MF	GO:0016705	oxidoreductase activity, acting on paire...
S. incanum MM577	SMEL_008g317370.1	Cytochrome P450	MF	GO:0016705	oxidoreductase activity, acting on paire...
S. incanum MM577	SMEL_008g317380.1	Cytochrome P450	MF	GO:0016705	oxidoreductase activity, acting on paire...
S. incanum MM577	SMEL_008g317390.1	cytochrome P450	MF	GO:0016705	oxidoreductase activity, acting on paire...
S. incanum MM577	SMEL_008g318480.1	Cytochrome P450	MF	GO:0016705	oxidoreductase activity, acting on paire...
S. incanum MM577	SMEL_009g333830.1	Ubiquinone biosynthesis monooxygenase COQ6, mitochondrial	MF	GO:0016705	oxidoreductase activity, acting on paire...
S. incanum MM577	SMEL_009g334730.1	Cytochrome P450	MF	GO:0016705	oxidoreductase activity, acting on paire...
S. incanum MM577	SMEL_009g335090.1	Cytochrome P450	MF	GO:0016705	oxidoreductase activity, acting on paire...
S. incanum MM577	SMEL_009g335100.1	Cytochrome P450	MF	GO:0016705	oxidoreductase activity, acting on paire...
S. incanum MM577	SMEL_009g335120.1	Cytochrome P450	MF	GO:0016705	oxidoreductase activity, acting on paire...
S. incanum MM577	SMEL_009g335800.1	Cytochrome P450	MF	GO:0016705	oxidoreductase activity, acting on paire...
S. incanum MM577	SMEL_010g344710.1	Cytochrome P450	MF	GO:0016705	oxidoreductase activity, acting on paire...
S. incanum MM577	SMEL_010g358560.1	Cytochrome P450	MF	GO:0016705	oxidoreductase activity, acting on paire...
S. incanum MM577	SMEL_010g361080.1	cytochrome P450	MF	GO:0016705	oxidoreductase activity, acting on paire...
S. incanum MM577	SMEL_010g361100.1	Cytochrome P450	MF	GO:0016705	oxidoreductase activity, acting on paire...
S. incanum MM577	SMEL_011g365870.1	Cytochrome P450	MF	GO:0016705	oxidoreductase activity, acting on paire...
S. incanum MM577	SMEL_011g366360.1	Cytochrome P450	MF	GO:0016705	oxidoreductase activity, acting on paire...
S. incanum MM577	SMEL_011g368510.1	Cytochrome P450	MF	GO:0016705	oxidoreductase activity, acting on paire...
S. incanum MM577	SMEL_011g368540.1	Cytochrome P450	MF	GO:0016705	oxidoreductase activity, acting on paire...
S. incanum MM577	SMEL_011g368970.1	Cytochrome P450	MF	GO:0016705	oxidoreductase activity, acting on paire...
S. incanum MM577	SMEL_012g380230.1	Lycopene epsilon cyclase, chloroplastic	MF	GO:0016705	oxidoreductase activity, acting on paire...
S. incanum MM577	SMEL_012g391170.1	Cytochrome P450	MF	GO:0016705	oxidoreductase activity, acting on paire...
S. incanum MM577	SMEL_012g392500.1	Cytochrome P450	MF	GO:0016705	oxidoreductase activity, acting on paire...
S. incanum MM577	SMEL_001g122850.1	No annotation	MF	GO:0010181	FMN binding
S. incanum MM577	SMEL_003g197530.1	Peroxisomal (S)-2-hydroxy-acid oxidase GLO4	MF	GO:0010181	FMN binding
S. incanum MM577	SMEL_003g197540.1	Peroxisomal (S)-2-hydroxy-acid oxidase GLO4	MF	GO:0010181	FMN binding
S. incanum MM577	SMEL_003g197550.1	Peroxisomal (S)-2-hydroxy-acid oxidase GLO4	MF	GO:0010181	FMN binding
S. incanum MM577	SMEL_004g202790.1	Peroxisomal (S)-2-hydroxy-acid oxidase	MF	GO:0010181	FMN binding
S. incanum MM577	SMEL_004g204590.1	No annotation	MF	GO:0010181	FMN binding
S. incanum MM577	SMEL_004g209140.1	No annotation	MF	GO:0010181	FMN binding
S. incanum MM577	SMEL_007g277510.1	Cytochrome P450 NADPH-reductase	MF	GO:0010181	FMN binding
S. incanum MM577	SMEL_008g304370.1	Peroxisomal (S)-2-hydroxy-acid oxidase	MF	GO:0010181	FMN binding
S. incanum MM577	SMEL_009g335460.1	No annotation	MF	GO:0010181	FMN binding
S. incanum MM577	SMEL_010g357130.1	Glutamine synthetase I	MF	GO:0004356	glutamate-ammonia ligase activity
S. incanum MM577	SMEL_010g357410.1	Glutamine synthetase I	MF	GO:0004356	glutamate-ammonia ligase activity
S. incanum MM577	SMEL_011g378860.1	Glutamine synthetase	MF	GO:0004356	glutamate-ammonia ligase activity
S. melongena MM1597	SMEL_002g157390.1	ATP synthase subunit alpha, chloroplastic	BP	GO:0015986	ATP synthesis coupled proton transport
S. melongena MM1597	SMEL_002g159590.1	ATP synthase subunit a, chloroplastic	BP	GO:0015986	ATP synthesis coupled proton transport
S. melongena MM1597	SMEL_004g221660.1	ATP synthase subunit alpha, chloroplastic	BP	GO:0015986	ATP synthesis coupled proton transport
S. melongena MM1597	SMEL_005g233380.1	ATP synthase subunit beta chloroplastic	BP	GO:0015986	ATP synthesis coupled proton transport
S. melongena MM1597	SMEL_007g282110.1	ATP synthase subunit beta chloroplastic	BP	GO:0015986	ATP synthesis coupled proton transport
S. melongena MM1597	SMEL_007g282910.1	ATP synthase subunit a chloroplastic	BP	GO:0015986	ATP synthesis coupled proton transport
S. melongena MM1597	SMEL_010g343560.1	Photosystem II CP47 reaction center protein	BP	GO:0015986	ATP synthesis coupled proton transport
S. melongena MM1597	SMEL_012g386950.1	ATP synthase subunit beta chloroplastic	BP	GO:0015986	ATP synthesis coupled proton transport
S. melongena MM1597	SMEL_012g387270.1	ATP synthase subunit alpha, mitochondrial	BP	GO:0015986	ATP synthesis coupled proton transport
S. melongena MM1597	SMEL_001g145450.1	Photosystem II CP43 reaction center protein	BP	GO:0015979	photosynthesis
S. melongena MM1597	SMEL_002g158360.1	Photosystem II D2 protein	BP	GO:0015979	photosynthesis
S. melongena MM1597	SMEL_002g159210.1	Ycf2	BP	GO:0015979	photosynthesis
S. melongena MM1597	SMEL_002g159350.1	Photosystem I P700 chlorophyll a apoprotein A1	BP	GO:0015979	photosynthesis
S. melongena MM1597	SMEL_002g162100.1	Oxygen-evolving enhancer protein 1, chloroplastic	BP	GO:0015979	photosynthesis
S. melongena MM1597	SMEL_003g177200.1	Cytochrome b6	BP	GO:0015979	photosynthesis
S. melongena MM1597	SMEL_003g191720.1	No annotation	BP	GO:0015979	photosynthesis
S. melongena MM1597	SMEL_004g204270.1	Photosystem II D2 protein	BP	GO:0015979	photosynthesis
S. melongena MM1597	SMEL_005g233370.1	Ribulose bisphosphate carboxylase large chain	BP	GO:0015979	photosynthesis
S. melongena MM1597	SMEL_005g233400.1	Photosystem I P700 chlorophyll a apoprotein A2	BP	GO:0015979	photosynthesis
S. melongena MM1597	SMEL_005g233410.1	Photosystem II D2 protein	BP	GO:0015979	photosynthesis
S. melongena MM1597	SMEL_006g253240.1	Photosystem I P700 chlorophyll a apoprotein A2	BP	GO:0015979	photosynthesis
S. melongena MM1597	SMEL_007g281980.1	Photosystem I P700 chlorophyll a apoprotein A1	BP	GO:0015979	photosynthesis
S. melongena MM1597	SMEL_007g283120.1	Photosystem II D2 protein	BP	GO:0015979	photosynthesis
S. melongena MM1597	SMEL_007g289740.1	Photosystem I P700 chlorophyll a apoprotein A1	BP	GO:0015979	photosynthesis
S. melongena MM1597	SMEL_010g340380.1	Chlorophyll a-b binding protein 8, chloroplastic	BP	GO:0015979	photosynthesis
S. melongena MM1597	SMEL_010g343560.1	Photosystem II CP47 reaction center protein	BP	GO:0015979	photosynthesis
S. melongena MM1597	SMEL_010g347780.1	Photosystem I P700 chlorophyll a apoprotein	BP	GO:0015979	photosynthesis
S. melongena MM1597	SMEL_010g354200.1	Photosystem II CP43 reaction center protein	BP	GO:0015979	photosynthesis
S. melongena MM1597	SMEL_012g383090.1	Photosystem II D2 protein	BP	GO:0015979	photosynthesis
S. melongena MM1597	SMEL_012g383810.1	Photosystem II oxygen evolving complex protein PsbP	BP	GO:0015979	photosynthesis
S. melongena MM1597	SMEL_012g387760.1	Photosystem Q(B) protein	BP	GO:0015979	photosynthesis
S. melongena MM1597	SMEL_012g389630.1	Photosystem I P700 chlorophyll a apoprotein A1	BP	GO:0015979	photosynthesis
S. melongena MM1597	SMEL_001g130440.1	Cytochrome P450	BP	GO:0055114	oxidation-reduction process
S. melongena MM1597	SMEL_001g134630.1	Citrate synthase	BP	GO:0055114	oxidation-reduction process
S. melongena MM1597	SMEL_001g137820.1	Cinnamoyl CoA reductase-like protein-binding domain	BP	GO:0055114	oxidation-reduction process
S. melongena MM1597	SMEL_001g145450.1	Photosystem II CP43 reaction center protein	BP	GO:0055114	oxidation-reduction process
S. melongena MM1597	SMEL_001g150090.1	Cytochrome P450	BP	GO:0055114	oxidation-reduction process
S. melongena MM1597	SMEL_002g153430.1	No annotation	BP	GO:0055114	oxidation-reduction process
S. melongena MM1597	SMEL_002g158360.1	Photosystem II D2 protein	BP	GO:0055114	oxidation-reduction process
S. melongena MM1597	SMEL_002g159210.1	Ycf2	BP	GO:0055114	oxidation-reduction process
S. melongena MM1597	SMEL_002g162520.1	DNA-directed RNA polymerase subunit beta''	BP	GO:0055114	oxidation-reduction process
S. melongena MM1597	SMEL_002g164000.1	Formate dehydrogenase, mitochondrial	BP	GO:0055114	oxidation-reduction process
S. melongena MM1597	SMEL_003g171370.1	Cytochrome P450	BP	GO:0055114	oxidation-reduction process
S. melongena MM1597	SMEL_003g172190.1	Peroxidase	BP	GO:0055114	oxidation-reduction process
S. melongena MM1597	SMEL_003g177200.1	Cytochrome b6	BP	GO:0055114	oxidation-reduction process
S. melongena MM1597	SMEL_003g179360.1	Glycerol-3-phosphate dehydrogenase	BP	GO:0055114	oxidation-reduction process
S. melongena MM1597	SMEL_003g186890.1	No annotation	BP	GO:0055114	oxidation-reduction process
S. melongena MM1597	SMEL_003g189220.1	Cytochrome P450	BP	GO:0055114	oxidation-reduction process
S. melongena MM1597	SMEL_003g192460.1	Cytochrome P450	BP	GO:0055114	oxidation-reduction process
S. melongena MM1597	SMEL_003g198640.1	No annotation	BP	GO:0055114	oxidation-reduction process
S. melongena MM1597	SMEL_004g201760.1	NAD(P)H-quinone oxidoreductase subunit H, chloroplastic	BP	GO:0055114	oxidation-reduction process
S. melongena MM1597	SMEL_004g203320.1	Cytochrome P450	BP	GO:0055114	oxidation-reduction process
S. melongena MM1597	SMEL_004g204270.1	Photosystem II D2 protein	BP	GO:0055114	oxidation-reduction process
S. melongena MM1597	SMEL_004g209280.1	NADH dehydrogenase [ubiquinone] iron-sulfur protein 3	BP	GO:0055114	oxidation-reduction process
S. melongena MM1597	SMEL_004g218970.1	Cytochrome P450	BP	GO:0055114	oxidation-reduction process
S. melongena MM1597	SMEL_004g220320.1	Cytochrome P450	BP	GO:0055114	oxidation-reduction process
S. melongena MM1597	SMEL_004g220330.1	Cytochrome P450	BP	GO:0055114	oxidation-reduction process
S. melongena MM1597	SMEL_004g220340.1	Cytochrome P450	BP	GO:0055114	oxidation-reduction process
S. melongena MM1597	SMEL_005g228920.1	Acyl-CoA dehydrogenase	BP	GO:0055114	oxidation-reduction process
S. melongena MM1597	SMEL_005g231970.1	No annotation	BP	GO:0055114	oxidation-reduction process
S. melongena MM1597	SMEL_005g233410.1	Photosystem II D2 protein	BP	GO:0055114	oxidation-reduction process
S. melongena MM1597	SMEL_005g241870.1	2-oxoglutarate-dependent dioxygenase	BP	GO:0055114	oxidation-reduction process
S. melongena MM1597	SMEL_006g248260.1	2-oxoglutarate-dependent dioxygenase	BP	GO:0055114	oxidation-reduction process
S. melongena MM1597	SMEL_006g266210.1	Cytochrome P450	BP	GO:0055114	oxidation-reduction process
S. melongena MM1597	SMEL_006g266270.1	Lycopene beta-cyclase 1	BP	GO:0055114	oxidation-reduction process
S. melongena MM1597	SMEL_006g268400.1	Cytochrome P450	BP	GO:0055114	oxidation-reduction process
S. melongena MM1597	SMEL_006g268950.1	Peroxidase 3	BP	GO:0055114	oxidation-reduction process
S. melongena MM1597	SMEL_007g278350.1	NAD(P)H-quinone oxidoreductase subunit H, chloroplastic	BP	GO:0055114	oxidation-reduction process
S. melongena MM1597	SMEL_007g278700.1	Cytochrome P450	BP	GO:0055114	oxidation-reduction process
S. melongena MM1597	SMEL_007g278740.1	Cytochrome P450	BP	GO:0055114	oxidation-reduction process
S. melongena MM1597	SMEL_007g283120.1	Photosystem II D2 protein	BP	GO:0055114	oxidation-reduction process
S. melongena MM1597	SMEL_007g286030.1	No annotation	BP	GO:0055114	oxidation-reduction process
S. melongena MM1597	SMEL_007g291630.1	Cytochrome P450	BP	GO:0055114	oxidation-reduction process
S. melongena MM1597	SMEL_007g291670.1	Cytochrome P450	BP	GO:0055114	oxidation-reduction process
S. melongena MM1597	SMEL_007g293240.1	Cytochrome c-type biogenesis ccda-like chloroplastic protein 2	BP	GO:0055114	oxidation-reduction process
S. melongena MM1597	SMEL_007g294370.1	Cytochrome P450	BP	GO:0055114	oxidation-reduction process
S. melongena MM1597	SMEL_008g317360.1	Cytochrome P450	BP	GO:0055114	oxidation-reduction process
S. melongena MM1597	SMEL_008g317370.1	Cytochrome P450	BP	GO:0055114	oxidation-reduction process
S. melongena MM1597	SMEL_008g317380.1	Cytochrome P450	BP	GO:0055114	oxidation-reduction process
S. melongena MM1597	SMEL_008g317390.1	cytochrome P450	BP	GO:0055114	oxidation-reduction process
S. melongena MM1597	SMEL_008g317400.1	cytochrome P450	BP	GO:0055114	oxidation-reduction process
S. melongena MM1597	SMEL_008g319090.1	Lysine-specific demethylase 5D	BP	GO:0055114	oxidation-reduction process
S. melongena MM1597	SMEL_009g332840.1	Alpha-dioxygenase	BP	GO:0055114	oxidation-reduction process
S. melongena MM1597	SMEL_009g335120.1	Cytochrome P450	BP	GO:0055114	oxidation-reduction process
S. melongena MM1597	SMEL_009g335790.1	Cytochrome P450	BP	GO:0055114	oxidation-reduction process
S. melongena MM1597	SMEL_009g335800.1	Cytochrome P450	BP	GO:0055114	oxidation-reduction process
S. melongena MM1597	SMEL_010g338150.1	Gibberellin 20-oxidase-like protein	BP	GO:0055114	oxidation-reduction process
S. melongena MM1597	SMEL_010g343560.1	Photosystem II CP47 reaction center protein	BP	GO:0055114	oxidation-reduction process
S. melongena MM1597	SMEL_010g343610.1	NAD(P)H-quinone oxidoreductase subunit 5, chloroplastic	BP	GO:0055114	oxidation-reduction process
S. melongena MM1597	SMEL_010g352320.1	No annotation	BP	GO:0055114	oxidation-reduction process
S. melongena MM1597	SMEL_010g352340.1	Laccase 1a	BP	GO:0055114	oxidation-reduction process
S. melongena MM1597	SMEL_010g352640.1	Acyl-CoA dehydrogenase	BP	GO:0055114	oxidation-reduction process
S. melongena MM1597	SMEL_010g353180.1	Peroxidase 1	BP	GO:0055114	oxidation-reduction process
S. melongena MM1597	SMEL_010g354200.1	Photosystem II CP43 reaction center protein	BP	GO:0055114	oxidation-reduction process
S. melongena MM1597	SMEL_010g357980.1	2-Cys peroxiredoxin BAS1-like, chloroplastic	BP	GO:0055114	oxidation-reduction process
S. melongena MM1597	SMEL_011g366360.1	Cytochrome P450	BP	GO:0055114	oxidation-reduction process
S. melongena MM1597	SMEL_011g367700.1	Cytochrome b6	BP	GO:0055114	oxidation-reduction process
S. melongena MM1597	SMEL_011g368540.1	Cytochrome P450	BP	GO:0055114	oxidation-reduction process
S. melongena MM1597	SMEL_011g371320.1	Cytochrome P450	BP	GO:0055114	oxidation-reduction process
S. melongena MM1597	SMEL_011g373970.1	Reductase 2	BP	GO:0055114	oxidation-reduction process
S. melongena MM1597	SMEL_011g376840.1	Alpha-ketoglutarate-dependent dioxygenase alkB homolog 3	BP	GO:0055114	oxidation-reduction process
S. melongena MM1597	SMEL_011g377020.1	Alpha-ketoglutarate-dependent dioxygenase alkB homolog 3	BP	GO:0055114	oxidation-reduction process
S. melongena MM1597	SMEL_011g377830.1	Pentatricopeptide repeat-containing protein	BP	GO:0055114	oxidation-reduction process
S. melongena MM1597	SMEL_012g383090.1	Photosystem II D2 protein	BP	GO:0055114	oxidation-reduction process
S. melongena MM1597	SMEL_012g384820.1	NAD(P)H-quinone oxidoreductase subunit J, chloroplastic	BP	GO:0055114	oxidation-reduction process
S. melongena MM1597	SMEL_012g387760.1	Photosystem Q(B) protein	BP	GO:0055114	oxidation-reduction process
S. melongena MM1597	SMEL_012g390040.1	D-lactate dehydrogenase	BP	GO:0055114	oxidation-reduction process
S. melongena MM1597	SMEL_012g392500.1	Cytochrome P450	BP	GO:0055114	oxidation-reduction process
S. melongena MM1597	SMEL_012g394280.1	Mitochondrial trans-2-enoyl-CoA reductase	BP	GO:0055114	oxidation-reduction process
S. melongena MM1597	SMEL_012g398680.1	Carotenoid cleavage dioxygenase	BP	GO:0055114	oxidation-reduction process
S. melongena MM1597	SMEL_002g162000.1	Ribulose bisphosphate carboxylase large chain	BP	GO:0015977	carbon fixation
S. melongena MM1597	SMEL_005g233370.1	Ribulose bisphosphate carboxylase large chain	BP	GO:0015977	carbon fixation
S. melongena MM1597	SMEL_012g386960.1	Ribulose bisphosphate carboxylase large chain	BP	GO:0015977	carbon fixation
S. melongena MM1597	SMEL_007g291960.1	Glucan synthase like 3	BP	GO:0006075	(1->3)-beta-D-glucan biosynthetic proces...
S. melongena MM1597	SMEL_007g294900.1	Glucan synthase like 3	BP	GO:0006075	(1->3)-beta-D-glucan biosynthetic proces...
S. melongena MM1597	SMEL_001g115990.1	Endo-1 4-beta-xylanase	BP	GO:0006044	N-acetylglucosamine metabolic process
S. melongena MM1597	SMEL_009g320710.1	DNA primase large subunit	BP	GO:0006269	DNA replication, synthesis of RNA primer
S. melongena MM1597	SMEL_008g307010.1	No annotation	BP	GO:0006336	DNA replication-independent nucleosome a...
S. melongena MM1597	SMEL_005g240560.1	Glucosidase 2 subunit beta	BP	GO:0006491	N-glycan processing
S. melongena MM1597	SMEL_003g189360.1	High-affinity nitrate transporter 3.1	BP	GO:0010167	response to nitrate
S. melongena MM1597	SMEL_003g189360.1	High-affinity nitrate transporter 3.1	BP	GO:0015706	nitrate transport
S. melongena MM1597	SMEL_007g291960.1	Glucan synthase like 3	CC	GO:0000148	1,3-beta-D-glucan synthase complex
S. melongena MM1597	SMEL_007g294900.1	Glucan synthase like 3	CC	GO:0000148	1,3-beta-D-glucan synthase complex
S. melongena MM1597	SMEL_012g394190.1	No annotation	CC	GO:0033063	Rad51B-Rad51C-Rad51D-XRCC2 complex
S. melongena MM1597	SMEL_001g147540.1	Endoribonuclease Dicer homolog 2	MF	GO:0004525	ribonuclease III activity
S. melongena MM1597	SMEL_005g225600.1	Ribonuclease 3-like protein 3	MF	GO:0004525	ribonuclease III activity
S. melongena MM1597	SMEL_007g278760.1	Endoribonuclease Dicer homolog 2	MF	GO:0004525	ribonuclease III activity
S. melongena MM1597	SMEL_011g365340.1	Endoribonuclease Dicer homolog 2	MF	GO:0004525	ribonuclease III activity
S. melongena MM1597	SMEL_011g365350.1	Endoribonuclease Dicer homolog 2	MF	GO:0004525	ribonuclease III activity
S. melongena MM1597	SMEL_011g365390.1	Endoribonuclease Dicer homolog 2	MF	GO:0004525	ribonuclease III activity
S. melongena MM1597	SMEL_001g130440.1	Cytochrome P450	MF	GO:0005506	iron ion binding
S. melongena MM1597	SMEL_001g150090.1	Cytochrome P450	MF	GO:0005506	iron ion binding
S. melongena MM1597	SMEL_002g162520.1	DNA-directed RNA polymerase subunit beta''	MF	GO:0005506	iron ion binding
S. melongena MM1597	SMEL_003g171370.1	Cytochrome P450	MF	GO:0005506	iron ion binding
S. melongena MM1597	SMEL_003g177200.1	Cytochrome b6	MF	GO:0005506	iron ion binding
S. melongena MM1597	SMEL_003g189220.1	Cytochrome P450	MF	GO:0005506	iron ion binding
S. melongena MM1597	SMEL_003g192460.1	Cytochrome P450	MF	GO:0005506	iron ion binding
S. melongena MM1597	SMEL_004g203320.1	Cytochrome P450	MF	GO:0005506	iron ion binding
S. melongena MM1597	SMEL_004g218970.1	Cytochrome P450	MF	GO:0005506	iron ion binding
S. melongena MM1597	SMEL_004g220320.1	Cytochrome P450	MF	GO:0005506	iron ion binding
S. melongena MM1597	SMEL_004g220330.1	Cytochrome P450	MF	GO:0005506	iron ion binding
S. melongena MM1597	SMEL_004g220340.1	Cytochrome P450	MF	GO:0005506	iron ion binding
S. melongena MM1597	SMEL_005g233370.1	Ribulose bisphosphate carboxylase large chain	MF	GO:0005506	iron ion binding
S. melongena MM1597	SMEL_006g266210.1	Cytochrome P450	MF	GO:0005506	iron ion binding
S. melongena MM1597	SMEL_006g268400.1	Cytochrome P450	MF	GO:0005506	iron ion binding
S. melongena MM1597	SMEL_007g278700.1	Cytochrome P450	MF	GO:0005506	iron ion binding
S. melongena MM1597	SMEL_007g278740.1	Cytochrome P450	MF	GO:0005506	iron ion binding
S. melongena MM1597	SMEL_007g291630.1	Cytochrome P450	MF	GO:0005506	iron ion binding
S. melongena MM1597	SMEL_007g291670.1	Cytochrome P450	MF	GO:0005506	iron ion binding
S. melongena MM1597	SMEL_007g294370.1	Cytochrome P450	MF	GO:0005506	iron ion binding
S. melongena MM1597	SMEL_008g317360.1	Cytochrome P450	MF	GO:0005506	iron ion binding
S. melongena MM1597	SMEL_008g317370.1	Cytochrome P450	MF	GO:0005506	iron ion binding
S. melongena MM1597	SMEL_008g317380.1	Cytochrome P450	MF	GO:0005506	iron ion binding
S. melongena MM1597	SMEL_008g317390.1	cytochrome P450	MF	GO:0005506	iron ion binding
S. melongena MM1597	SMEL_008g317400.1	cytochrome P450	MF	GO:0005506	iron ion binding
S. melongena MM1597	SMEL_009g335120.1	Cytochrome P450	MF	GO:0005506	iron ion binding
S. melongena MM1597	SMEL_009g335790.1	Cytochrome P450	MF	GO:0005506	iron ion binding
S. melongena MM1597	SMEL_009g335800.1	Cytochrome P450	MF	GO:0005506	iron ion binding
S. melongena MM1597	SMEL_011g366360.1	Cytochrome P450	MF	GO:0005506	iron ion binding
S. melongena MM1597	SMEL_011g368540.1	Cytochrome P450	MF	GO:0005506	iron ion binding
S. melongena MM1597	SMEL_011g371320.1	Cytochrome P450	MF	GO:0005506	iron ion binding
S. melongena MM1597	SMEL_012g392500.1	Cytochrome P450	MF	GO:0005506	iron ion binding
S. melongena MM1597	SMEL_002g157430.1	DNA-directed RNA polymerase subunit beta''	MF	GO:0034062	5'-3' RNA polymerase activity
S. melongena MM1597	SMEL_002g158370.1	DNA-directed RNA polymerase subunit beta	MF	GO:0034062	5'-3' RNA polymerase activity
S. melongena MM1597	SMEL_003g174850.1	RNA-dependent RNA polymerase	MF	GO:0034062	5'-3' RNA polymerase activity
S. melongena MM1597	SMEL_004g208680.1	DNA-directed RNA polymerase subunit alpha	MF	GO:0034062	5'-3' RNA polymerase activity
S. melongena MM1597	SMEL_005g233420.1	DNA-directed RNA polymerase subunit beta''	MF	GO:0034062	5'-3' RNA polymerase activity
S. melongena MM1597	SMEL_006g252870.1	RNA-dependent RNA polymerase	MF	GO:0034062	5'-3' RNA polymerase activity
S. melongena MM1597	SMEL_007g281190.1	DNA-directed RNA polymerase subunit beta	MF	GO:0034062	5'-3' RNA polymerase activity
S. melongena MM1597	SMEL_007g284420.1	DNA-directed RNA polymerase subunit beta	MF	GO:0034062	5'-3' RNA polymerase activity
S. melongena MM1597	SMEL_008g313700.1	DNA-directed RNA polymerase	MF	GO:0034062	5'-3' RNA polymerase activity
S. melongena MM1597	SMEL_009g320710.1	DNA primase large subunit	MF	GO:0034062	5'-3' RNA polymerase activity
S. melongena MM1597	SMEL_010g349790.1	RNA-dependent RNA polymerase	MF	GO:0034062	5'-3' RNA polymerase activity
S. melongena MM1597	SMEL_011g375960.1	DNA-directed RNA polymerase subunit beta	MF	GO:0034062	5'-3' RNA polymerase activity
S. melongena MM1597	SMEL_012g390950.1	DNA-directed RNA polymerase subunit beta	MF	GO:0034062	5'-3' RNA polymerase activity
S. melongena MM1597	SMEL_002g157390.1	ATP synthase subunit alpha, chloroplastic	MF	GO:0046933	proton-transporting ATP synthase activit...
S. melongena MM1597	SMEL_004g221660.1	ATP synthase subunit alpha, chloroplastic	MF	GO:0046933	proton-transporting ATP synthase activit...
S. melongena MM1597	SMEL_005g233380.1	ATP synthase subunit beta chloroplastic	MF	GO:0046933	proton-transporting ATP synthase activit...
S. melongena MM1597	SMEL_007g282110.1	ATP synthase subunit beta chloroplastic	MF	GO:0046933	proton-transporting ATP synthase activit...
S. melongena MM1597	SMEL_012g386950.1	ATP synthase subunit beta chloroplastic	MF	GO:0046933	proton-transporting ATP synthase activit...
S. melongena MM1597	SMEL_012g387270.1	ATP synthase subunit alpha, mitochondrial	MF	GO:0046933	proton-transporting ATP synthase activit...
S. melongena MM1597	SMEL_001g118240.1	Kinesin-like protein	MF	GO:0036094	small molecule binding
S. melongena MM1597	SMEL_001g120460.1	Cc-nbs-lrr, resistance protein with an R1 specific domain	MF	GO:0036094	small molecule binding
S. melongena MM1597	SMEL_001g124000.1	Serine_threonine-protein kinase Haspin	MF	GO:0036094	small molecule binding
S. melongena MM1597	SMEL_001g127240.1	Calcium-transporting ATPase 1	MF	GO:0036094	small molecule binding
S. melongena MM1597	SMEL_001g131880.1	Elongation factor G-2, mitochondrial	MF	GO:0036094	small molecule binding
S. melongena MM1597	SMEL_001g131930.1	Chromodomain-helicase-DNA-binding protein 1-like	MF	GO:0036094	small molecule binding
S. melongena MM1597	SMEL_001g133720.1	Cc-nbs-lrr, resistance protein	MF	GO:0036094	small molecule binding
S. melongena MM1597	SMEL_001g133990.1	Ycf2	MF	GO:0036094	small molecule binding
S. melongena MM1597	SMEL_001g139180.1	Ycf2	MF	GO:0036094	small molecule binding
S. melongena MM1597	SMEL_001g144730.1	Cc-nbs-lrr, resistance protein	MF	GO:0036094	small molecule binding
S. melongena MM1597	SMEL_001g146880.1	Ycf2	MF	GO:0036094	small molecule binding
S. melongena MM1597	SMEL_001g148260.1	Tir-nbs-lrr, resistance protein	MF	GO:0036094	small molecule binding
S. melongena MM1597	SMEL_001g149240.1	Cc-nbs-lrr, resistance protein	MF	GO:0036094	small molecule binding
S. melongena MM1597	SMEL_001g149810.1	No annotation	MF	GO:0036094	small molecule binding
S. melongena MM1597	SMEL_001g149970.1	DNA helicase	MF	GO:0036094	small molecule binding
S. melongena MM1597	SMEL_001g150540.1	No annotation	MF	GO:0036094	small molecule binding
S. melongena MM1597	SMEL_001g150550.1	No annotation	MF	GO:0036094	small molecule binding
S. melongena MM1597	SMEL_001g150590.1	No annotation	MF	GO:0036094	small molecule binding
S. melongena MM1597	SMEL_002g153930.1	Ycf2	MF	GO:0036094	small molecule binding
S. melongena MM1597	SMEL_002g154680.1	Cc-nbs-lrr, resistance protein	MF	GO:0036094	small molecule binding
S. melongena MM1597	SMEL_002g155460.1	Kinase family protein	MF	GO:0036094	small molecule binding
S. melongena MM1597	SMEL_002g155620.1	Cc-nbs-lrr, resistance protein	MF	GO:0036094	small molecule binding
S. melongena MM1597	SMEL_002g156450.1	Ycf2	MF	GO:0036094	small molecule binding
S. melongena MM1597	SMEL_002g157030.1	Ycf2	MF	GO:0036094	small molecule binding
S. melongena MM1597	SMEL_002g157390.1	ATP synthase subunit alpha, chloroplastic	MF	GO:0036094	small molecule binding
S. melongena MM1597	SMEL_002g158370.1	DNA-directed RNA polymerase subunit beta	MF	GO:0036094	small molecule binding
S. melongena MM1597	SMEL_002g159210.1	Ycf2	MF	GO:0036094	small molecule binding
S. melongena MM1597	SMEL_002g161730.1	Lipid A export ATP-binding_permease protein msbA	MF	GO:0036094	small molecule binding
S. melongena MM1597	SMEL_002g161990.1	Ycf2	MF	GO:0036094	small molecule binding
S. melongena MM1597	SMEL_002g162790.1	No annotation	MF	GO:0036094	small molecule binding
S. melongena MM1597	SMEL_002g163820.1	DEAD-box ATP-dependent RNA helicase 46	MF	GO:0036094	small molecule binding
S. melongena MM1597	SMEL_002g164000.1	Formate dehydrogenase, mitochondrial	MF	GO:0036094	small molecule binding
S. melongena MM1597	SMEL_002g167540.1	Structural maintenance of chromosomes protein 4	MF	GO:0036094	small molecule binding
S. melongena MM1597	SMEL_003g170120.1	Receptor like kinase, RLK	MF	GO:0036094	small molecule binding
S. melongena MM1597	SMEL_003g170130.1	Receptor like kinase, RLK	MF	GO:0036094	small molecule binding
S. melongena MM1597	SMEL_003g170850.1	Ycf2	MF	GO:0036094	small molecule binding
S. melongena MM1597	SMEL_003g173270.1	Receptor like kinase, RLK	MF	GO:0036094	small molecule binding
S. melongena MM1597	SMEL_003g175350.1	Ycf2	MF	GO:0036094	small molecule binding
S. melongena MM1597	SMEL_003g177070.1	No annotation	MF	GO:0036094	small molecule binding
S. melongena MM1597	SMEL_003g177710.1	Ycf2	MF	GO:0036094	small molecule binding
S. melongena MM1597	SMEL_003g177770.1	Ycf2	MF	GO:0036094	small molecule binding
S. melongena MM1597	SMEL_003g178530.1	Alanine aminotransferase 2	MF	GO:0036094	small molecule binding
S. melongena MM1597	SMEL_003g179360.1	Glycerol-3-phosphate dehydrogenase	MF	GO:0036094	small molecule binding
S. melongena MM1597	SMEL_003g180010.1	Copper-transporting ATPase	MF	GO:0036094	small molecule binding
S. melongena MM1597	SMEL_003g182610.1	ABC transporter B family member 28	MF	GO:0036094	small molecule binding
S. melongena MM1597	SMEL_003g187100.1	ATP synthase subunit beta chloroplastic	MF	GO:0036094	small molecule binding
S. melongena MM1597	SMEL_003g189130.1	Receptor like kinase, RLK	MF	GO:0036094	small molecule binding
S. melongena MM1597	SMEL_003g191260.1	Ycf2	MF	GO:0036094	small molecule binding
S. melongena MM1597	SMEL_003g198640.1	No annotation	MF	GO:0036094	small molecule binding
S. melongena MM1597	SMEL_003g198830.1	No annotation	MF	GO:0036094	small molecule binding
S. melongena MM1597	SMEL_003g199240.1	Ycf2	MF	GO:0036094	small molecule binding
S. melongena MM1597	SMEL_004g201180.1	No annotation	MF	GO:0036094	small molecule binding
S. melongena MM1597	SMEL_004g201760.1	NAD(P)H-quinone oxidoreductase subunit H, chloroplastic	MF	GO:0036094	small molecule binding
S. melongena MM1597	SMEL_004g203000.1	No annotation	MF	GO:0036094	small molecule binding
S. melongena MM1597	SMEL_004g203730.1	No annotation	MF	GO:0036094	small molecule binding
S. melongena MM1597	SMEL_004g205810.1	No annotation	MF	GO:0036094	small molecule binding
S. melongena MM1597	SMEL_004g208710.1	50S ribosomal protein L2 chloroplastic	MF	GO:0036094	small molecule binding
S. melongena MM1597	SMEL_004g209790.1	Dephospho-CoA kinase	MF	GO:0036094	small molecule binding
S. melongena MM1597	SMEL_004g214390.1	Ycf2	MF	GO:0036094	small molecule binding
S. melongena MM1597	SMEL_004g215460.1	Apoptotic chromatin condensation inducer 1	MF	GO:0036094	small molecule binding
S. melongena MM1597	SMEL_004g218510.1	No annotation	MF	GO:0036094	small molecule binding
S. melongena MM1597	SMEL_004g221660.1	ATP synthase subunit alpha, chloroplastic	MF	GO:0036094	small molecule binding
S. melongena MM1597	SMEL_005g224260.1	1-aminocyclopropane-1-carboxylate synthase	MF	GO:0036094	small molecule binding
S. melongena MM1597	SMEL_005g226250.1	RNA-binding protein 39	MF	GO:0036094	small molecule binding
S. melongena MM1597	SMEL_005g227610.1	Ycf2	MF	GO:0036094	small molecule binding
S. melongena MM1597	SMEL_005g228920.1	Acyl-CoA dehydrogenase	MF	GO:0036094	small molecule binding
S. melongena MM1597	SMEL_005g233380.1	ATP synthase subunit beta chloroplastic	MF	GO:0036094	small molecule binding
S. melongena MM1597	SMEL_005g233420.1	DNA-directed RNA polymerase subunit beta''	MF	GO:0036094	small molecule binding
S. melongena MM1597	SMEL_005g234310.1	No annotation	MF	GO:0036094	small molecule binding
S. melongena MM1597	SMEL_005g234350.1	RNA cytidine acetyltransferase 1	MF	GO:0036094	small molecule binding
S. melongena MM1597	SMEL_005g235520.1	Acetyl-CoA carboxylase	MF	GO:0036094	small molecule binding
S. melongena MM1597	SMEL_005g237920.1	Kinase family protein	MF	GO:0036094	small molecule binding
S. melongena MM1597	SMEL_005g239490.1	No annotation	MF	GO:0036094	small molecule binding
S. melongena MM1597	SMEL_005g240070.1	No annotation	MF	GO:0036094	small molecule binding
S. melongena MM1597	SMEL_005g240080.1	No annotation	MF	GO:0036094	small molecule binding
S. melongena MM1597	SMEL_005g240090.1	Tir-nbs-lrr, resistance protein	MF	GO:0036094	small molecule binding
S. melongena MM1597	SMEL_005g241130.1	No annotation	MF	GO:0036094	small molecule binding
S. melongena MM1597	SMEL_005g238790.1	Tir-nbs-lrr, resistance protein	MF	GO:0036094	small molecule binding
S. melongena MM1597	SMEL_005g240330.1	Kinesin like protein	MF	GO:0036094	small molecule binding
S. melongena MM1597	SMEL_005g240540.1	Unknown protein	MF	GO:0036094	small molecule binding
S. melongena MM1597	SMEL_005g241850.1	No annotation	MF	GO:0036094	small molecule binding
S. melongena MM1597	SMEL_006g243400.1	Receptor like kinase, RLK	MF	GO:0036094	small molecule binding
S. melongena MM1597	SMEL_006g244260.1	26S protease regulatory subunit 7 homolog A	MF	GO:0036094	small molecule binding
S. melongena MM1597	SMEL_006g245800.1	Ycf2	MF	GO:0036094	small molecule binding
S. melongena MM1597	SMEL_006g247340.1	Receptor like kinase, RLK	MF	GO:0036094	small molecule binding
S. melongena MM1597	SMEL_006g247360.1	Receptor like kinase, RLK	MF	GO:0036094	small molecule binding
S. melongena MM1597	SMEL_006g250250.1	Tubulin alpha-7 chain	MF	GO:0036094	small molecule binding
S. melongena MM1597	SMEL_006g250300.1	Receptor like kinase, RLK	MF	GO:0036094	small molecule binding
S. melongena MM1597	SMEL_006g250640.1	Ycf2	MF	GO:0036094	small molecule binding
S. melongena MM1597	SMEL_006g251220.1	Multidrug resistance protein ABC transporter family	MF	GO:0036094	small molecule binding
S. melongena MM1597	SMEL_006g252910.1	Polyadenylate-binding protein	MF	GO:0036094	small molecule binding
S. melongena MM1597	SMEL_006g253040.1	Cc-nbs-lrr, resistance protein	MF	GO:0036094	small molecule binding
S. melongena MM1597	SMEL_006g253610.1	Receptor-like protein kinase	MF	GO:0036094	small molecule binding
S. melongena MM1597	SMEL_006g255320.1	ATP synthase subunit alpha, chloroplastic	MF	GO:0036094	small molecule binding
S. melongena MM1597	SMEL_006g256270.1	DnaJ-like protein	MF	GO:0036094	small molecule binding
S. melongena MM1597	SMEL_006g257430.1	Holliday junction ATP-dependent DNA helicase ruvB	MF	GO:0036094	small molecule binding
S. melongena MM1597	SMEL_006g258050.1	No annotation	MF	GO:0036094	small molecule binding
S. melongena MM1597	SMEL_006g262970.1	ABC transporter A family member 7	MF	GO:0036094	small molecule binding
S. melongena MM1597	SMEL_006g263430.1	Protein kinase	MF	GO:0036094	small molecule binding
S. melongena MM1597	SMEL_006g263700.1	Related to ATP dependent RNA helicase	MF	GO:0036094	small molecule binding
S. melongena MM1597	SMEL_007g274410.1	Receptor-like protein kinase	MF	GO:0036094	small molecule binding
S. melongena MM1597	SMEL_007g274420.1	Wall-associated receptor kinase-like 9	MF	GO:0036094	small molecule binding
S. melongena MM1597	SMEL_007g275800.1	ATP synthase subunit beta chloroplastic	MF	GO:0036094	small molecule binding
S. melongena MM1597	SMEL_007g278350.1	NAD(P)H-quinone oxidoreductase subunit H, chloroplastic	MF	GO:0036094	small molecule binding
S. melongena MM1597	SMEL_007g280250.1	Ycf2	MF	GO:0036094	small molecule binding
S. melongena MM1597	SMEL_007g281830.1	Gamma aminobutyrate transaminase 1, mitochondrial	MF	GO:0036094	small molecule binding
S. melongena MM1597	SMEL_007g282110.1	ATP synthase subunit beta chloroplastic	MF	GO:0036094	small molecule binding
S. melongena MM1597	SMEL_007g283330.1	50S ribosomal protein L23, chloroplastic	MF	GO:0036094	small molecule binding
S. melongena MM1597	SMEL_007g284420.1	DNA-directed RNA polymerase subunit beta	MF	GO:0036094	small molecule binding
S. melongena MM1597	SMEL_007g285740.1	ATP-dependent RNA helicase A	MF	GO:0036094	small molecule binding
S. melongena MM1597	SMEL_007g291650.1	DNA helicase	MF	GO:0036094	small molecule binding
S. melongena MM1597	SMEL_007g291720.1	Receptor-like kinase	MF	GO:0036094	small molecule binding
S. melongena MM1597	SMEL_007g292870.1	Receptor-like kinase	MF	GO:0036094	small molecule binding
S. melongena MM1597	SMEL_007g293020.1	Receptor-like kinase	MF	GO:0036094	small molecule binding
S. melongena MM1597	SMEL_007g294250.1	RNA binding protein	MF	GO:0036094	small molecule binding
S. melongena MM1597	SMEL_008g298140.1	Cc-nbs-lrr, resistance protein	MF	GO:0036094	small molecule binding
S. melongena MM1597	SMEL_008g299290.1	No annotation	MF	GO:0036094	small molecule binding
S. melongena MM1597	SMEL_008g299620.1	Tir-nbs-lrr, resistance protein	MF	GO:0036094	small molecule binding
S. melongena MM1597	SMEL_008g300390.1	No annotation	MF	GO:0036094	small molecule binding
S. melongena MM1597	SMEL_008g307910.1	Polyadenylate-binding protein 1	MF	GO:0036094	small molecule binding
S. melongena MM1597	SMEL_008g313150.1	No annotation	MF	GO:0036094	small molecule binding
S. melongena MM1597	SMEL_008g313700.1	DNA-directed RNA polymerase	MF	GO:0036094	small molecule binding
S. melongena MM1597	SMEL_008g315310.1	UMP-CMP kinase 3	MF	GO:0036094	small molecule binding
S. melongena MM1597	SMEL_008g315720.1	DNA helicase	MF	GO:0036094	small molecule binding
S. melongena MM1597	SMEL_009g323760.1	No annotation	MF	GO:0036094	small molecule binding
S. melongena MM1597	SMEL_009g328460.1	RNA-binding protein-like	MF	GO:0036094	small molecule binding
S. melongena MM1597	SMEL_009g329960.1	Serine/arginine-rich-splicing factor SR34	MF	GO:0036094	small molecule binding
S. melongena MM1597	SMEL_009g331420.1	Kinase-like protein	MF	GO:0036094	small molecule binding
S. melongena MM1597	SMEL_009g331780.1	Ycf2	MF	GO:0036094	small molecule binding
S. melongena MM1597	SMEL_009g333430.1	Myosin XI-F	MF	GO:0036094	small molecule binding
S. melongena MM1597	SMEL_009g335290.1	Ras-related protein Rab-25	MF	GO:0036094	small molecule binding
S. melongena MM1597	SMEL_009g335680.1	No annotation	MF	GO:0036094	small molecule binding
S. melongena MM1597	SMEL_010g337090.1	Receptor-like kinase	MF	GO:0036094	small molecule binding
S. melongena MM1597	SMEL_010g337100.1	Receptor-like protein kinase	MF	GO:0036094	small molecule binding
S. melongena MM1597	SMEL_010g337860.1	Receptor-like protein kinase	MF	GO:0036094	small molecule binding
S. melongena MM1597	SMEL_010g337920.1	Receptor-like protein kinase	MF	GO:0036094	small molecule binding
S. melongena MM1597	SMEL_010g337950.1	Receptor-like protein kinase	MF	GO:0036094	small molecule binding
S. melongena MM1597	SMEL_010g339810.1	Nbs, resistance protein fragment	MF	GO:0036094	small molecule binding
S. melongena MM1597	SMEL_010g340220.1	No annotation	MF	GO:0036094	small molecule binding
S. melongena MM1597	SMEL_010g341300.1	50S ribosomal protein L23, chloroplastic	MF	GO:0036094	small molecule binding
S. melongena MM1597	SMEL_010g341580.1	Ras-related protein Rab-18	MF	GO:0036094	small molecule binding
S. melongena MM1597	SMEL_010g344650.1	Wall-associated receptor kinase 2	MF	GO:0036094	small molecule binding
S. melongena MM1597	SMEL_010g346350.1	No annotation	MF	GO:0036094	small molecule binding
S. melongena MM1597	SMEL_010g347600.1	Ras-related protein Rab-6A	MF	GO:0036094	small molecule binding
S. melongena MM1597	SMEL_010g347860.1	Ycf2	MF	GO:0036094	small molecule binding
S. melongena MM1597	SMEL_010g349790.1	RNA-dependent RNA polymerase	MF	GO:0036094	small molecule binding
S. melongena MM1597	SMEL_010g350600.1	Cc-nbs-lrr, resistance protein with an R1 specific domain	MF	GO:0036094	small molecule binding
S. melongena MM1597	SMEL_010g351230.1	No annotation	MF	GO:0036094	small molecule binding
S. melongena MM1597	SMEL_010g351950.1	THO complex subunit 4	MF	GO:0036094	small molecule binding
S. melongena MM1597	SMEL_010g352640.1	Acyl-CoA dehydrogenase	MF	GO:0036094	small molecule binding
S. melongena MM1597	SMEL_010g352990.1	Kinase family protein	MF	GO:0036094	small molecule binding
S. melongena MM1597	SMEL_010g358310.1	Calcium dependent protein kinase 2	MF	GO:0036094	small molecule binding
S. melongena MM1597	SMEL_010g358710.1	Cc-nbs-lrr, resistance protein	MF	GO:0036094	small molecule binding
S. melongena MM1597	SMEL_010g359700.1	No annotation	MF	GO:0036094	small molecule binding
S. melongena MM1597	SMEL_010g360640.1	Adenylosuccinate synthetase, chloroplastic	MF	GO:0036094	small molecule binding
S. melongena MM1597	SMEL_011g361990.1	Tir-nbs-lrr, resistance protein	MF	GO:0036094	small molecule binding
S. melongena MM1597	SMEL_011g362550.1	Tir-nbs-lrr, resistance protein	MF	GO:0036094	small molecule binding
S. melongena MM1597	SMEL_011g363480.1	Tir-nbs-lrr, resistance protein	MF	GO:0036094	small molecule binding
S. melongena MM1597	SMEL_011g363490.1	Tir-nbs-lrr, resistance protein	MF	GO:0036094	small molecule binding
S. melongena MM1597	SMEL_011g363540.1	Tir-nbs-lrr, resistance protein	MF	GO:0036094	small molecule binding
S. melongena MM1597	SMEL_011g364700.1	Serine-threonine protein kinase	MF	GO:0036094	small molecule binding
S. melongena MM1597	SMEL_011g365340.1	Endoribonuclease Dicer homolog 2	MF	GO:0036094	small molecule binding
S. melongena MM1597	SMEL_011g368170.1	Interferon-induced GTP-binding protein Mx	MF	GO:0036094	small molecule binding
S. melongena MM1597	SMEL_011g370770.1	50S ribosomal protein L23, chloroplastic	MF	GO:0036094	small molecule binding
S. melongena MM1597	SMEL_011g372120.1	ATP synthase subunit beta chloroplastic	MF	GO:0036094	small molecule binding
S. melongena MM1597	SMEL_011g375960.1	DNA-directed RNA polymerase subunit beta	MF	GO:0036094	small molecule binding
S. melongena MM1597	SMEL_011g376400.1	Nbs-lrr, resistance protein	MF	GO:0036094	small molecule binding
S. melongena MM1597	SMEL_011g376820.1	ABC transporter B family member 14	MF	GO:0036094	small molecule binding
S. melongena MM1597	SMEL_011g377830.1	Pentatricopeptide repeat-containing protein	MF	GO:0036094	small molecule binding
S. melongena MM1597	SMEL_012g381110.1	Ankyrin repeat domain-containing protein 1	MF	GO:0036094	small molecule binding
S. melongena MM1597	SMEL_012g382280.1	Ycf2	MF	GO:0036094	small molecule binding
S. melongena MM1597	SMEL_012g383500.1	Cc-nbs-lrr, resistance protein	MF	GO:0036094	small molecule binding
S. melongena MM1597	SMEL_012g385000.1	Receptor like kinase, RLK	MF	GO:0036094	small molecule binding
S. melongena MM1597	SMEL_012g386120.1	Ycf2	MF	GO:0036094	small molecule binding
S. melongena MM1597	SMEL_012g386950.1	ATP synthase subunit beta chloroplastic	MF	GO:0036094	small molecule binding
S. melongena MM1597	SMEL_012g387270.1	ATP synthase subunit alpha, mitochondrial	MF	GO:0036094	small molecule binding
S. melongena MM1597	SMEL_012g387420.1	Ycf2	MF	GO:0036094	small molecule binding
S. melongena MM1597	SMEL_012g388470.1	Ycf2	MF	GO:0036094	small molecule binding
S. melongena MM1597	SMEL_012g390040.1	D-lactate dehydrogenase	MF	GO:0036094	small molecule binding
S. melongena MM1597	SMEL_012g390950.1	DNA-directed RNA polymerase subunit beta	MF	GO:0036094	small molecule binding
S. melongena MM1597	SMEL_012g391880.1	Multidrug resistance protein ABC transporter family	MF	GO:0036094	small molecule binding
S. melongena MM1597	SMEL_012g394190.1	No annotation	MF	GO:0036094	small molecule binding
S. melongena MM1597	SMEL_012g394570.1	Cc-nbs-lrr, resistance protein	MF	GO:0036094	small molecule binding
S. melongena MM1597	SMEL_012g395260.1	Serine_threonine kinase	MF	GO:0036094	small molecule binding
S. melongena MM1597	SMEL_001g118240.1	Kinesin-like protein	MF	GO:0097367	carbohydrate derivative binding
S. melongena MM1597	SMEL_001g120460.1	Cc-nbs-lrr, resistance protein with an R1 specific domain	MF	GO:0097367	carbohydrate derivative binding
S. melongena MM1597	SMEL_001g124000.1	Serine_threonine-protein kinase Haspin	MF	GO:0097367	carbohydrate derivative binding
S. melongena MM1597	SMEL_001g127240.1	Calcium-transporting ATPase 1	MF	GO:0097367	carbohydrate derivative binding
S. melongena MM1597	SMEL_001g131880.1	Elongation factor G-2, mitochondrial	MF	GO:0097367	carbohydrate derivative binding
S. melongena MM1597	SMEL_001g131930.1	Chromodomain-helicase-DNA-binding protein 1-like	MF	GO:0097367	carbohydrate derivative binding
S. melongena MM1597	SMEL_001g133720.1	Cc-nbs-lrr, resistance protein	MF	GO:0097367	carbohydrate derivative binding
S. melongena MM1597	SMEL_001g133990.1	Ycf2	MF	GO:0097367	carbohydrate derivative binding
S. melongena MM1597	SMEL_001g139180.1	Ycf2	MF	GO:0097367	carbohydrate derivative binding
S. melongena MM1597	SMEL_001g144730.1	Cc-nbs-lrr, resistance protein	MF	GO:0097367	carbohydrate derivative binding
S. melongena MM1597	SMEL_001g146880.1	Ycf2	MF	GO:0097367	carbohydrate derivative binding
S. melongena MM1597	SMEL_001g148260.1	Tir-nbs-lrr, resistance protein	MF	GO:0097367	carbohydrate derivative binding
S. melongena MM1597	SMEL_001g149240.1	Cc-nbs-lrr, resistance protein	MF	GO:0097367	carbohydrate derivative binding
S. melongena MM1597	SMEL_001g149810.1	No annotation	MF	GO:0097367	carbohydrate derivative binding
S. melongena MM1597	SMEL_001g149970.1	DNA helicase	MF	GO:0097367	carbohydrate derivative binding
S. melongena MM1597	SMEL_001g150540.1	No annotation	MF	GO:0097367	carbohydrate derivative binding
S. melongena MM1597	SMEL_001g150550.1	No annotation	MF	GO:0097367	carbohydrate derivative binding
S. melongena MM1597	SMEL_001g150590.1	No annotation	MF	GO:0097367	carbohydrate derivative binding
S. melongena MM1597	SMEL_002g153930.1	Ycf2	MF	GO:0097367	carbohydrate derivative binding
S. melongena MM1597	SMEL_002g154680.1	Cc-nbs-lrr, resistance protein	MF	GO:0097367	carbohydrate derivative binding
S. melongena MM1597	SMEL_002g155460.1	Kinase family protein	MF	GO:0097367	carbohydrate derivative binding
S. melongena MM1597	SMEL_002g155620.1	Cc-nbs-lrr, resistance protein	MF	GO:0097367	carbohydrate derivative binding
S. melongena MM1597	SMEL_002g156220.1	Chitin-binding lectin 1	MF	GO:0097367	carbohydrate derivative binding
S. melongena MM1597	SMEL_002g156450.1	Ycf2	MF	GO:0097367	carbohydrate derivative binding
S. melongena MM1597	SMEL_002g157030.1	Ycf2	MF	GO:0097367	carbohydrate derivative binding
S. melongena MM1597	SMEL_002g157390.1	ATP synthase subunit alpha, chloroplastic	MF	GO:0097367	carbohydrate derivative binding
S. melongena MM1597	SMEL_002g158370.1	DNA-directed RNA polymerase subunit beta	MF	GO:0097367	carbohydrate derivative binding
S. melongena MM1597	SMEL_002g159210.1	Ycf2	MF	GO:0097367	carbohydrate derivative binding
S. melongena MM1597	SMEL_002g161730.1	Lipid A export ATP-binding_permease protein msbA	MF	GO:0097367	carbohydrate derivative binding
S. melongena MM1597	SMEL_002g161990.1	Ycf2	MF	GO:0097367	carbohydrate derivative binding
S. melongena MM1597	SMEL_002g162790.1	No annotation	MF	GO:0097367	carbohydrate derivative binding
S. melongena MM1597	SMEL_002g163820.1	DEAD-box ATP-dependent RNA helicase 46	MF	GO:0097367	carbohydrate derivative binding
S. melongena MM1597	SMEL_002g167540.1	Structural maintenance of chromosomes protein 4	MF	GO:0097367	carbohydrate derivative binding
S. melongena MM1597	SMEL_003g170120.1	Receptor like kinase, RLK	MF	GO:0097367	carbohydrate derivative binding
S. melongena MM1597	SMEL_003g170130.1	Receptor like kinase, RLK	MF	GO:0097367	carbohydrate derivative binding
S. melongena MM1597	SMEL_003g170850.1	Ycf2	MF	GO:0097367	carbohydrate derivative binding
S. melongena MM1597	SMEL_003g173270.1	Receptor like kinase, RLK	MF	GO:0097367	carbohydrate derivative binding
S. melongena MM1597	SMEL_003g175350.1	Ycf2	MF	GO:0097367	carbohydrate derivative binding
S. melongena MM1597	SMEL_003g177070.1	No annotation	MF	GO:0097367	carbohydrate derivative binding
S. melongena MM1597	SMEL_003g177710.1	Ycf2	MF	GO:0097367	carbohydrate derivative binding
S. melongena MM1597	SMEL_003g177770.1	Ycf2	MF	GO:0097367	carbohydrate derivative binding
S. melongena MM1597	SMEL_003g180010.1	Copper-transporting ATPase	MF	GO:0097367	carbohydrate derivative binding
S. melongena MM1597	SMEL_003g182610.1	ABC transporter B family member 28	MF	GO:0097367	carbohydrate derivative binding
S. melongena MM1597	SMEL_003g187100.1	ATP synthase subunit beta chloroplastic	MF	GO:0097367	carbohydrate derivative binding
S. melongena MM1597	SMEL_003g189130.1	Receptor like kinase, RLK	MF	GO:0097367	carbohydrate derivative binding
S. melongena MM1597	SMEL_003g191260.1	Ycf2	MF	GO:0097367	carbohydrate derivative binding
S. melongena MM1597	SMEL_003g198830.1	No annotation	MF	GO:0097367	carbohydrate derivative binding
S. melongena MM1597	SMEL_003g199240.1	Ycf2	MF	GO:0097367	carbohydrate derivative binding
S. melongena MM1597	SMEL_004g201180.1	No annotation	MF	GO:0097367	carbohydrate derivative binding
S. melongena MM1597	SMEL_004g203730.1	No annotation	MF	GO:0097367	carbohydrate derivative binding
S. melongena MM1597	SMEL_004g205810.1	No annotation	MF	GO:0097367	carbohydrate derivative binding
S. melongena MM1597	SMEL_004g209790.1	Dephospho-CoA kinase	MF	GO:0097367	carbohydrate derivative binding
S. melongena MM1597	SMEL_004g214390.1	Ycf2	MF	GO:0097367	carbohydrate derivative binding
S. melongena MM1597	SMEL_004g218510.1	No annotation	MF	GO:0097367	carbohydrate derivative binding
S. melongena MM1597	SMEL_004g221660.1	ATP synthase subunit alpha, chloroplastic	MF	GO:0097367	carbohydrate derivative binding
S. melongena MM1597	SMEL_005g227610.1	Ycf2	MF	GO:0097367	carbohydrate derivative binding
S. melongena MM1597	SMEL_005g233380.1	ATP synthase subunit beta chloroplastic	MF	GO:0097367	carbohydrate derivative binding
S. melongena MM1597	SMEL_005g233420.1	DNA-directed RNA polymerase subunit beta''	MF	GO:0097367	carbohydrate derivative binding
S. melongena MM1597	SMEL_005g234350.1	RNA cytidine acetyltransferase 1	MF	GO:0097367	carbohydrate derivative binding
S. melongena MM1597	SMEL_005g235520.1	Acetyl-CoA carboxylase	MF	GO:0097367	carbohydrate derivative binding
S. melongena MM1597	SMEL_005g237920.1	Kinase family protein	MF	GO:0097367	carbohydrate derivative binding
S. melongena MM1597	SMEL_005g239490.1	No annotation	MF	GO:0097367	carbohydrate derivative binding
S. melongena MM1597	SMEL_005g240070.1	No annotation	MF	GO:0097367	carbohydrate derivative binding
S. melongena MM1597	SMEL_005g240080.1	No annotation	MF	GO:0097367	carbohydrate derivative binding
S. melongena MM1597	SMEL_005g240090.1	Tir-nbs-lrr, resistance protein	MF	GO:0097367	carbohydrate derivative binding
S. melongena MM1597	SMEL_005g241130.1	No annotation	MF	GO:0097367	carbohydrate derivative binding
S. melongena MM1597	SMEL_005g238790.1	Tir-nbs-lrr, resistance protein	MF	GO:0097367	carbohydrate derivative binding
S. melongena MM1597	SMEL_005g240330.1	Kinesin like protein	MF	GO:0097367	carbohydrate derivative binding
S. melongena MM1597	SMEL_005g241850.1	No annotation	MF	GO:0097367	carbohydrate derivative binding
S. melongena MM1597	SMEL_006g243400.1	Receptor like kinase, RLK	MF	GO:0097367	carbohydrate derivative binding
S. melongena MM1597	SMEL_006g244260.1	26S protease regulatory subunit 7 homolog A	MF	GO:0097367	carbohydrate derivative binding
S. melongena MM1597	SMEL_006g245800.1	Ycf2	MF	GO:0097367	carbohydrate derivative binding
S. melongena MM1597	SMEL_006g247340.1	Receptor like kinase, RLK	MF	GO:0097367	carbohydrate derivative binding
S. melongena MM1597	SMEL_006g247360.1	Receptor like kinase, RLK	MF	GO:0097367	carbohydrate derivative binding
S. melongena MM1597	SMEL_006g250250.1	Tubulin alpha-7 chain	MF	GO:0097367	carbohydrate derivative binding
S. melongena MM1597	SMEL_006g250300.1	Receptor like kinase, RLK	MF	GO:0097367	carbohydrate derivative binding
S. melongena MM1597	SMEL_006g250640.1	Ycf2	MF	GO:0097367	carbohydrate derivative binding
S. melongena MM1597	SMEL_006g251220.1	Multidrug resistance protein ABC transporter family	MF	GO:0097367	carbohydrate derivative binding
S. melongena MM1597	SMEL_006g253040.1	Cc-nbs-lrr, resistance protein	MF	GO:0097367	carbohydrate derivative binding
S. melongena MM1597	SMEL_006g253610.1	Receptor-like protein kinase	MF	GO:0097367	carbohydrate derivative binding
S. melongena MM1597	SMEL_006g255320.1	ATP synthase subunit alpha, chloroplastic	MF	GO:0097367	carbohydrate derivative binding
S. melongena MM1597	SMEL_006g257430.1	Holliday junction ATP-dependent DNA helicase ruvB	MF	GO:0097367	carbohydrate derivative binding
S. melongena MM1597	SMEL_006g258050.1	No annotation	MF	GO:0097367	carbohydrate derivative binding
S. melongena MM1597	SMEL_006g262970.1	ABC transporter A family member 7	MF	GO:0097367	carbohydrate derivative binding
S. melongena MM1597	SMEL_006g263430.1	Protein kinase	MF	GO:0097367	carbohydrate derivative binding
S. melongena MM1597	SMEL_006g263700.1	Related to ATP dependent RNA helicase	MF	GO:0097367	carbohydrate derivative binding
S. melongena MM1597	SMEL_007g274410.1	Receptor-like protein kinase	MF	GO:0097367	carbohydrate derivative binding
S. melongena MM1597	SMEL_007g274420.1	Wall-associated receptor kinase-like 9	MF	GO:0097367	carbohydrate derivative binding
S. melongena MM1597	SMEL_007g275800.1	ATP synthase subunit beta chloroplastic	MF	GO:0097367	carbohydrate derivative binding
S. melongena MM1597	SMEL_007g280250.1	Ycf2	MF	GO:0097367	carbohydrate derivative binding
S. melongena MM1597	SMEL_007g282110.1	ATP synthase subunit beta chloroplastic	MF	GO:0097367	carbohydrate derivative binding
S. melongena MM1597	SMEL_007g284420.1	DNA-directed RNA polymerase subunit beta	MF	GO:0097367	carbohydrate derivative binding
S. melongena MM1597	SMEL_007g285740.1	ATP-dependent RNA helicase A	MF	GO:0097367	carbohydrate derivative binding
S. melongena MM1597	SMEL_007g291650.1	DNA helicase	MF	GO:0097367	carbohydrate derivative binding
S. melongena MM1597	SMEL_007g291720.1	Receptor-like kinase	MF	GO:0097367	carbohydrate derivative binding
S. melongena MM1597	SMEL_007g292870.1	Receptor-like kinase	MF	GO:0097367	carbohydrate derivative binding
S. melongena MM1597	SMEL_007g293020.1	Receptor-like kinase	MF	GO:0097367	carbohydrate derivative binding
S. melongena MM1597	SMEL_008g298140.1	Cc-nbs-lrr, resistance protein	MF	GO:0097367	carbohydrate derivative binding
S. melongena MM1597	SMEL_008g299290.1	No annotation	MF	GO:0097367	carbohydrate derivative binding
S. melongena MM1597	SMEL_008g299620.1	Tir-nbs-lrr, resistance protein	MF	GO:0097367	carbohydrate derivative binding
S. melongena MM1597	SMEL_008g300390.1	No annotation	MF	GO:0097367	carbohydrate derivative binding
S. melongena MM1597	SMEL_008g313150.1	No annotation	MF	GO:0097367	carbohydrate derivative binding
S. melongena MM1597	SMEL_008g313700.1	DNA-directed RNA polymerase	MF	GO:0097367	carbohydrate derivative binding
S. melongena MM1597	SMEL_008g315310.1	UMP-CMP kinase 3	MF	GO:0097367	carbohydrate derivative binding
S. melongena MM1597	SMEL_008g315720.1	DNA helicase	MF	GO:0097367	carbohydrate derivative binding
S. melongena MM1597	SMEL_009g323760.1	No annotation	MF	GO:0097367	carbohydrate derivative binding
S. melongena MM1597	SMEL_009g331420.1	Kinase-like protein	MF	GO:0097367	carbohydrate derivative binding
S. melongena MM1597	SMEL_009g331780.1	Ycf2	MF	GO:0097367	carbohydrate derivative binding
S. melongena MM1597	SMEL_009g333430.1	Myosin XI-F	MF	GO:0097367	carbohydrate derivative binding
S. melongena MM1597	SMEL_009g335290.1	Ras-related protein Rab-25	MF	GO:0097367	carbohydrate derivative binding
S. melongena MM1597	SMEL_009g335680.1	No annotation	MF	GO:0097367	carbohydrate derivative binding
S. melongena MM1597	SMEL_010g337090.1	Receptor-like kinase	MF	GO:0097367	carbohydrate derivative binding
S. melongena MM1597	SMEL_010g337100.1	Receptor-like protein kinase	MF	GO:0097367	carbohydrate derivative binding
S. melongena MM1597	SMEL_010g337860.1	Receptor-like protein kinase	MF	GO:0097367	carbohydrate derivative binding
S. melongena MM1597	SMEL_010g337920.1	Receptor-like protein kinase	MF	GO:0097367	carbohydrate derivative binding
S. melongena MM1597	SMEL_010g337950.1	Receptor-like protein kinase	MF	GO:0097367	carbohydrate derivative binding
S. melongena MM1597	SMEL_010g339810.1	Nbs, resistance protein fragment	MF	GO:0097367	carbohydrate derivative binding
S. melongena MM1597	SMEL_010g341580.1	Ras-related protein Rab-18	MF	GO:0097367	carbohydrate derivative binding
S. melongena MM1597	SMEL_010g344650.1	Wall-associated receptor kinase 2	MF	GO:0097367	carbohydrate derivative binding
S. melongena MM1597	SMEL_010g347600.1	Ras-related protein Rab-6A	MF	GO:0097367	carbohydrate derivative binding
S. melongena MM1597	SMEL_010g347860.1	Ycf2	MF	GO:0097367	carbohydrate derivative binding
S. melongena MM1597	SMEL_010g350600.1	Cc-nbs-lrr, resistance protein with an R1 specific domain	MF	GO:0097367	carbohydrate derivative binding
S. melongena MM1597	SMEL_010g351230.1	No annotation	MF	GO:0097367	carbohydrate derivative binding
S. melongena MM1597	SMEL_010g352990.1	Kinase family protein	MF	GO:0097367	carbohydrate derivative binding
S. melongena MM1597	SMEL_010g358310.1	Calcium dependent protein kinase 2	MF	GO:0097367	carbohydrate derivative binding
S. melongena MM1597	SMEL_010g358710.1	Cc-nbs-lrr, resistance protein	MF	GO:0097367	carbohydrate derivative binding
S. melongena MM1597	SMEL_010g359700.1	No annotation	MF	GO:0097367	carbohydrate derivative binding
S. melongena MM1597	SMEL_010g360640.1	Adenylosuccinate synthetase, chloroplastic	MF	GO:0097367	carbohydrate derivative binding
S. melongena MM1597	SMEL_011g361990.1	Tir-nbs-lrr, resistance protein	MF	GO:0097367	carbohydrate derivative binding
S. melongena MM1597	SMEL_011g362550.1	Tir-nbs-lrr, resistance protein	MF	GO:0097367	carbohydrate derivative binding
S. melongena MM1597	SMEL_011g363480.1	Tir-nbs-lrr, resistance protein	MF	GO:0097367	carbohydrate derivative binding
S. melongena MM1597	SMEL_011g363490.1	Tir-nbs-lrr, resistance protein	MF	GO:0097367	carbohydrate derivative binding
S. melongena MM1597	SMEL_011g363540.1	Tir-nbs-lrr, resistance protein	MF	GO:0097367	carbohydrate derivative binding
S. melongena MM1597	SMEL_011g364700.1	Serine-threonine protein kinase	MF	GO:0097367	carbohydrate derivative binding
S. melongena MM1597	SMEL_011g365340.1	Endoribonuclease Dicer homolog 2	MF	GO:0097367	carbohydrate derivative binding
S. melongena MM1597	SMEL_011g368170.1	Interferon-induced GTP-binding protein Mx	MF	GO:0097367	carbohydrate derivative binding
S. melongena MM1597	SMEL_011g372120.1	ATP synthase subunit beta chloroplastic	MF	GO:0097367	carbohydrate derivative binding
S. melongena MM1597	SMEL_011g375960.1	DNA-directed RNA polymerase subunit beta	MF	GO:0097367	carbohydrate derivative binding
S. melongena MM1597	SMEL_011g376400.1	Nbs-lrr, resistance protein	MF	GO:0097367	carbohydrate derivative binding
S. melongena MM1597	SMEL_011g376820.1	ABC transporter B family member 14	MF	GO:0097367	carbohydrate derivative binding
S. melongena MM1597	SMEL_011g377830.1	Pentatricopeptide repeat-containing protein	MF	GO:0097367	carbohydrate derivative binding
S. melongena MM1597	SMEL_012g381110.1	Ankyrin repeat domain-containing protein 1	MF	GO:0097367	carbohydrate derivative binding
S. melongena MM1597	SMEL_012g382280.1	Ycf2	MF	GO:0097367	carbohydrate derivative binding
S. melongena MM1597	SMEL_012g383210.1	Endochitinase (Chitinase)	MF	GO:0097367	carbohydrate derivative binding
S. melongena MM1597	SMEL_012g383500.1	Cc-nbs-lrr, resistance protein	MF	GO:0097367	carbohydrate derivative binding
S. melongena MM1597	SMEL_012g385000.1	Receptor like kinase, RLK	MF	GO:0097367	carbohydrate derivative binding
S. melongena MM1597	SMEL_012g386120.1	Ycf2	MF	GO:0097367	carbohydrate derivative binding
S. melongena MM1597	SMEL_012g386950.1	ATP synthase subunit beta chloroplastic	MF	GO:0097367	carbohydrate derivative binding
S. melongena MM1597	SMEL_012g387270.1	ATP synthase subunit alpha, mitochondrial	MF	GO:0097367	carbohydrate derivative binding
S. melongena MM1597	SMEL_012g387420.1	Ycf2	MF	GO:0097367	carbohydrate derivative binding
S. melongena MM1597	SMEL_012g388470.1	Ycf2	MF	GO:0097367	carbohydrate derivative binding
S. melongena MM1597	SMEL_012g390950.1	DNA-directed RNA polymerase subunit beta	MF	GO:0097367	carbohydrate derivative binding
S. melongena MM1597	SMEL_012g391880.1	Multidrug resistance protein ABC transporter family	MF	GO:0097367	carbohydrate derivative binding
S. melongena MM1597	SMEL_012g394190.1	No annotation	MF	GO:0097367	carbohydrate derivative binding
S. melongena MM1597	SMEL_012g394570.1	Cc-nbs-lrr, resistance protein	MF	GO:0097367	carbohydrate derivative binding
S. melongena MM1597	SMEL_012g395260.1	Serine_threonine kinase	MF	GO:0097367	carbohydrate derivative binding
S. melongena MM1597	SMEL_005g233370.1	Ribulose bisphosphate carboxylase large chain	MF	GO:0003989	acetyl-CoA carboxylase activity
S. melongena MM1597	SMEL_005g235520.1	Acetyl-CoA carboxylase	MF	GO:0003989	acetyl-CoA carboxylase activity
S. melongena MM1597	SMEL_012g386970.1	Acetyl-coenzyme A carboxylase carboxyl transferase subunit beta, chloroplastic	MF	GO:0003989	acetyl-CoA carboxylase activity
S. melongena MM1597	SMEL_001g116900.1	Phosphoglucomutase	MF	GO:0016868	intramolecular transferase activity, pho...
S. melongena MM1597	SMEL_005g224440.1	Phosphomannomutase 2	MF	GO:0016868	intramolecular transferase activity, pho...
S. melongena MM1597	SMEL_008g315330.1	Phosphoacetylglucosamine mutase	MF	GO:0016868	intramolecular transferase activity, pho...
S. melongena MM1597	SMEL_002g162000.1	Ribulose bisphosphate carboxylase large chain	MF	GO:0016984	ribulose-bisphosphate carboxylase activi...
S. melongena MM1597	SMEL_005g233370.1	Ribulose bisphosphate carboxylase large chain	MF	GO:0016984	ribulose-bisphosphate carboxylase activi...
S. melongena MM1597	SMEL_012g386960.1	Ribulose bisphosphate carboxylase large chain	MF	GO:0016984	ribulose-bisphosphate carboxylase activi...
S. melongena MM1597	SMEL_001g127240.1	Calcium-transporting ATPase 1	MF	GO:0042626	ATPase activity, coupled to transmembran...
S. melongena MM1597	SMEL_002g157390.1	ATP synthase subunit alpha, chloroplastic	MF	GO:0042626	ATPase activity, coupled to transmembran...
S. melongena MM1597	SMEL_003g182610.1	ABC transporter B family member 28	MF	GO:0042626	ATPase activity, coupled to transmembran...
S. melongena MM1597	SMEL_003g198830.1	No annotation	MF	GO:0042626	ATPase activity, coupled to transmembran...
S. melongena MM1597	SMEL_004g221660.1	ATP synthase subunit alpha, chloroplastic	MF	GO:0042626	ATPase activity, coupled to transmembran...
S. melongena MM1597	SMEL_005g233380.1	ATP synthase subunit beta chloroplastic	MF	GO:0042626	ATPase activity, coupled to transmembran...
S. melongena MM1597	SMEL_006g251220.1	Multidrug resistance protein ABC transporter family	MF	GO:0042626	ATPase activity, coupled to transmembran...
S. melongena MM1597	SMEL_007g282110.1	ATP synthase subunit beta chloroplastic	MF	GO:0042626	ATPase activity, coupled to transmembran...
S. melongena MM1597	SMEL_011g376820.1	ABC transporter B family member 14	MF	GO:0042626	ATPase activity, coupled to transmembran...
S. melongena MM1597	SMEL_012g386950.1	ATP synthase subunit beta chloroplastic	MF	GO:0042626	ATPase activity, coupled to transmembran...
S. melongena MM1597	SMEL_012g387270.1	ATP synthase subunit alpha, mitochondrial	MF	GO:0042626	ATPase activity, coupled to transmembran...
S. melongena MM1597	SMEL_012g391880.1	Multidrug resistance protein ABC transporter family	MF	GO:0042626	ATPase activity, coupled to transmembran...
S. melongena MM1597	SMEL_007g291960.1	Glucan synthase like 3	MF	GO:0003843	1,3-beta-D-glucan synthase activity
S. melongena MM1597	SMEL_007g294900.1	Glucan synthase like 3	MF	GO:0003843	1,3-beta-D-glucan synthase activity
S. melongena MM1597	SMEL_002g162030.1	30S ribosomal protein S4 chloroplastic	MF	GO:0019843	rRNA binding
S. melongena MM1597	SMEL_005g241870.1	2-oxoglutarate-dependent dioxygenase	MF	GO:0019843	rRNA binding
S. melongena MM1597	SMEL_011g367680.1	30S ribosomal protein S3 chloroplastic	MF	GO:0019843	rRNA binding
S. melongena MM1597	SMEL_012g386930.1	30S ribosomal protein S4 chloroplastic	MF	GO:0019843	rRNA binding
S. melongena MM1597	SMEL_001g122140.1	UDP-glucose glycoprotein glucosyltransferase	MF	GO:0003980	UDP-glucose:glycoprotein glucosyltransfe...
S. melongena MM1597	SMEL_010g360640.1	Adenylosuccinate synthetase, chloroplastic	MF	GO:0004019	adenylosuccinate synthase activity
S. melongena MM1597	SMEL_001g134630.1	Citrate synthase	MF	GO:0004108	citrate (Si)-synthase activity
S. melongena MM1597	SMEL_001g115990.1	Endo-1 4-beta-xylanase	MF	GO:0004342	glucosamine-6-phosphate deaminase activi...
S. melongena MM1597	SMEL_004g211570.1	Phosphoribosylformylglycinamidine cyclo-ligase	MF	GO:0004641	phosphoribosylformylglycinamidine cyclo-...
S. melongena MM1597	SMEL_009g335990.1	Selenium binding protein	MF	GO:0008430	selenium binding
S. melongena MM1597	SMEL_002g164000.1	Formate dehydrogenase, mitochondrial	MF	GO:0008863	formate dehydrogenase (NAD+) activity
S. melongena MM1597	SMEL_006g257430.1	Holliday junction ATP-dependent DNA helicase ruvB	MF	GO:0009378	four-way junction helicase activity
S. melongena MM1597	SMEL_007g274390.1	Sucrose phosphate synthase	MF	GO:0046524	sucrose-phosphate synthase activity
S. melongena DH_ECAVI	SMEL_002g157390.1	ATP synthase subunit alpha, chloroplastic	BP	GO:0015986	ATP synthesis coupled proton transport
S. melongena DH_ECAVI	SMEL_002g159590.1	ATP synthase subunit a, chloroplastic	BP	GO:0015986	ATP synthesis coupled proton transport
S. melongena DH_ECAVI	SMEL_004g208990.1	ATP synthase subunit alpha, chloroplastic	BP	GO:0015986	ATP synthesis coupled proton transport
S. melongena DH_ECAVI	SMEL_004g221660.1	ATP synthase subunit alpha, chloroplastic	BP	GO:0015986	ATP synthesis coupled proton transport
S. melongena DH_ECAVI	SMEL_005g233380.1	ATP synthase subunit beta chloroplastic	BP	GO:0015986	ATP synthesis coupled proton transport
S. melongena DH_ECAVI	SMEL_005g236050.1	ATP synthase protein MI25	BP	GO:0015986	ATP synthesis coupled proton transport
S. melongena DH_ECAVI	SMEL_007g282110.1	ATP synthase subunit beta chloroplastic	BP	GO:0015986	ATP synthesis coupled proton transport
S. melongena DH_ECAVI	SMEL_007g282910.1	ATP synthase subunit a chloroplastic	BP	GO:0015986	ATP synthesis coupled proton transport
S. melongena DH_ECAVI	SMEL_007g284770.1	ATP synthase subunit alpha chloroplastic	BP	GO:0015986	ATP synthesis coupled proton transport
S. melongena DH_ECAVI	SMEL_012g386950.1	ATP synthase subunit beta chloroplastic	BP	GO:0015986	ATP synthesis coupled proton transport
S. melongena DH_ECAVI	SMEL_001g145450.1	Photosystem II CP43 reaction center protein	BP	GO:0015979	photosynthesis
S. melongena DH_ECAVI	SMEL_002g158350.1	Photosystem I P700 chlorophyll a apoprotein A2	BP	GO:0015979	photosynthesis
S. melongena DH_ECAVI	SMEL_002g158360.1	Photosystem II D2 protein	BP	GO:0015979	photosynthesis
S. melongena DH_ECAVI	SMEL_002g159210.1	Ycf2	BP	GO:0015979	photosynthesis
S. melongena DH_ECAVI	SMEL_002g159350.1	Photosystem I P700 chlorophyll a apoprotein A1	BP	GO:0015979	photosynthesis
S. melongena DH_ECAVI	SMEL_002g162100.1	Oxygen-evolving enhancer protein 1, chloroplastic	BP	GO:0015979	photosynthesis
S. melongena DH_ECAVI	SMEL_003g177730.1	Photosystem II CP43 reaction center protein	BP	GO:0015979	photosynthesis
S. melongena DH_ECAVI	SMEL_003g191720.1	No annotation	BP	GO:0015979	photosynthesis
S. melongena DH_ECAVI	SMEL_004g204270.1	Photosystem II D2 protein	BP	GO:0015979	photosynthesis
S. melongena DH_ECAVI	SMEL_005g233340.1	Photosystem II CP47 reaction center protein	BP	GO:0015979	photosynthesis
S. melongena DH_ECAVI	SMEL_005g233370.1	Ribulose bisphosphate carboxylase large chain	BP	GO:0015979	photosynthesis
S. melongena DH_ECAVI	SMEL_005g233400.1	Photosystem I P700 chlorophyll a apoprotein A2	BP	GO:0015979	photosynthesis
S. melongena DH_ECAVI	SMEL_005g233410.1	Photosystem II D2 protein	BP	GO:0015979	photosynthesis
S. melongena DH_ECAVI	SMEL_006g253240.1	Photosystem I P700 chlorophyll a apoprotein A2	BP	GO:0015979	photosynthesis
S. melongena DH_ECAVI	SMEL_007g281980.1	Photosystem I P700 chlorophyll a apoprotein A1	BP	GO:0015979	photosynthesis
S. melongena DH_ECAVI	SMEL_007g283120.1	Photosystem II D2 protein	BP	GO:0015979	photosynthesis
S. melongena DH_ECAVI	SMEL_008g308570.1	Photosystem Q(B) protein	BP	GO:0015979	photosynthesis
S. melongena DH_ECAVI	SMEL_009g325570.1	Photosystem II CP43 reaction center protein	BP	GO:0015979	photosynthesis
S. melongena DH_ECAVI	SMEL_009g326170.1	Photosystem I P700 chlorophyll a apoprotein A1	BP	GO:0015979	photosynthesis
S. melongena DH_ECAVI	SMEL_010g340380.1	Chlorophyll a-b binding protein 8, chloroplastic	BP	GO:0015979	photosynthesis
S. melongena DH_ECAVI	SMEL_010g347780.1	Photosystem I P700 chlorophyll a apoprotein	BP	GO:0015979	photosynthesis
S. melongena DH_ECAVI	SMEL_011g365450.1	Photosystem II oxygen evolving complex protein PsbP	BP	GO:0015979	photosynthesis
S. melongena DH_ECAVI	SMEL_012g383090.1	Photosystem II D2 protein	BP	GO:0015979	photosynthesis
S. melongena DH_ECAVI	SMEL_012g383810.1	Photosystem II oxygen evolving complex protein PsbP	BP	GO:0015979	photosynthesis
S. melongena DH_ECAVI	SMEL_012g387760.1	Photosystem Q(B) protein	BP	GO:0015979	photosynthesis
S. melongena DH_ECAVI	SMEL_012g389630.1	Photosystem I P700 chlorophyll a apoprotein A1	BP	GO:0015979	photosynthesis
S. melongena DH_ECAVI	SMEL_002g157390.1	ATP synthase subunit alpha, chloroplastic	BP	GO:0015991	ATP hydrolysis coupled proton transport
S. melongena DH_ECAVI	SMEL_003g187100.1	ATP synthase subunit beta chloroplastic	BP	GO:0015991	ATP hydrolysis coupled proton transport
S. melongena DH_ECAVI	SMEL_004g208990.1	ATP synthase subunit alpha, chloroplastic	BP	GO:0015991	ATP hydrolysis coupled proton transport
S. melongena DH_ECAVI	SMEL_004g221660.1	ATP synthase subunit alpha, chloroplastic	BP	GO:0015991	ATP hydrolysis coupled proton transport
S. melongena DH_ECAVI	SMEL_005g233380.1	ATP synthase subunit beta chloroplastic	BP	GO:0015991	ATP hydrolysis coupled proton transport
S. melongena DH_ECAVI	SMEL_006g255320.1	ATP synthase subunit alpha, chloroplastic	BP	GO:0015991	ATP hydrolysis coupled proton transport
S. melongena DH_ECAVI	SMEL_007g275800.1	ATP synthase subunit beta chloroplastic	BP	GO:0015991	ATP hydrolysis coupled proton transport
S. melongena DH_ECAVI	SMEL_012g386950.1	ATP synthase subunit beta chloroplastic	BP	GO:0015991	ATP hydrolysis coupled proton transport
S. melongena DH_ECAVI	SMEL_012g398340.1	ATP synthase subunit beta chloroplastic	BP	GO:0015991	ATP hydrolysis coupled proton transport
S. melongena DH_ECAVI	SMEL_001g138030.1	Structural maintenance of chromosomes family protein	BP	GO:0000724	double-strand break repair via homologou...
S. melongena DH_ECAVI	SMEL_002g154470.1	40S ribosomal protein S19-like	BP	GO:0000724	double-strand break repair via homologou...
S. melongena DH_ECAVI	SMEL_002g154480.1	Breast cancer susceptibility protein 2b	BP	GO:0000724	double-strand break repair via homologou...
S. melongena DH_ECAVI	SMEL_003g174880.1	Regulatory-associated protein of TOR 1	BP	GO:0031929	TOR signaling
S. melongena DH_ECAVI	SMEL_010g353100.1	Regulatory-associated protein of TOR 1	BP	GO:0031929	TOR signaling
S. melongena DH_ECAVI	SMEL_001g134630.1	Citrate synthase	BP	GO:0009060	aerobic respiration
S. melongena DH_ECAVI	SMEL_007g283690.1	Cytochrome c oxidase subunit 1	BP	GO:0009060	aerobic respiration
S. melongena DH_ECAVI	SMEL_010g341760.1	Dihydrolipoyllysine-residue succinyltransferase component of 2-oxoglutarate dehydrogenase complex 1, mitochondrial	BP	GO:0009060	aerobic respiration
S. melongena DH_ECAVI	SMEL_002g162000.1	Ribulose bisphosphate carboxylase large chain	BP	GO:0015977	carbon fixation
S. melongena DH_ECAVI	SMEL_005g233370.1	Ribulose bisphosphate carboxylase large chain	BP	GO:0015977	carbon fixation
S. melongena DH_ECAVI	SMEL_012g386960.1	Ribulose bisphosphate carboxylase large chain	BP	GO:0015977	carbon fixation
S. melongena DH_ECAVI	SMEL_006g270210.1	No annotation	BP	GO:1901264	carbohydrate derivative transport
S. melongena DH_ECAVI	SMEL_011g367220.1	No annotation	BP	GO:1901264	carbohydrate derivative transport
S. melongena DH_ECAVI	SMEL_009g320710.1	DNA primase large subunit	BP	GO:0006269	DNA replication, synthesis of RNA primer
S. melongena DH_ECAVI	SMEL_008g307010.1	No annotation	BP	GO:0006336	DNA replication-independent nucleosome a...
S. melongena DH_ECAVI	SMEL_001g119350.1	DNA repair protein REV1	BP	GO:0042276	error-prone translesion synthesis
S. melongena DH_ECAVI	SMEL_002g157390.1	ATP synthase subunit alpha, chloroplastic	CC	GO:0033178	proton-transporting two-sector ATPase co...
S. melongena DH_ECAVI	SMEL_003g187100.1	ATP synthase subunit beta chloroplastic	CC	GO:0033178	proton-transporting two-sector ATPase co...
S. melongena DH_ECAVI	SMEL_004g208990.1	ATP synthase subunit alpha, chloroplastic	CC	GO:0033178	proton-transporting two-sector ATPase co...
S. melongena DH_ECAVI	SMEL_004g221660.1	ATP synthase subunit alpha, chloroplastic	CC	GO:0033178	proton-transporting two-sector ATPase co...
S. melongena DH_ECAVI	SMEL_005g233380.1	ATP synthase subunit beta chloroplastic	CC	GO:0033178	proton-transporting two-sector ATPase co...
S. melongena DH_ECAVI	SMEL_006g255320.1	ATP synthase subunit alpha, chloroplastic	CC	GO:0033178	proton-transporting two-sector ATPase co...
S. melongena DH_ECAVI	SMEL_007g275800.1	ATP synthase subunit beta chloroplastic	CC	GO:0033178	proton-transporting two-sector ATPase co...
S. melongena DH_ECAVI	SMEL_012g386950.1	ATP synthase subunit beta chloroplastic	CC	GO:0033178	proton-transporting two-sector ATPase co...
S. melongena DH_ECAVI	SMEL_012g398340.1	ATP synthase subunit beta chloroplastic	CC	GO:0033178	proton-transporting two-sector ATPase co...
S. melongena DH_ECAVI	SMEL_003g174880.1	Regulatory-associated protein of TOR 1	CC	GO:0031931	TORC1 complex
S. melongena DH_ECAVI	SMEL_010g353100.1	Regulatory-associated protein of TOR 1	CC	GO:0031931	TORC1 complex
S. melongena DH_ECAVI	SMEL_001g124570.1	Microfibrillar-associated protein 1	CC	GO:0001527	microfibril
S. melongena DH_ECAVI	SMEL_004g201730.1	unknown protein	CC	GO:0044599	AP-5 adaptor complex
S. melongena DH_ECAVI	SMEL_002g162100.1	Oxygen-evolving enhancer protein 1, chloroplastic	CC	GO:0009654	photosystem II oxygen evolving complex
S. melongena DH_ECAVI	SMEL_011g365450.1	Photosystem II oxygen evolving complex protein PsbP	CC	GO:0009654	photosystem II oxygen evolving complex
S. melongena DH_ECAVI	SMEL_012g383810.1	Photosystem II oxygen evolving complex protein PsbP	CC	GO:0009654	photosystem II oxygen evolving complex
S. melongena DH_ECAVI	SMEL_001g116960.1	Kinesin like protein	MF	GO:0008144	drug binding
S. melongena DH_ECAVI	SMEL_001g122250.1	Serine_threonine protein kinase	MF	GO:0008144	drug binding
S. melongena DH_ECAVI	SMEL_001g133990.1	Ycf2	MF	GO:0008144	drug binding
S. melongena DH_ECAVI	SMEL_001g135540.1	DNA repair protein	MF	GO:0008144	drug binding
S. melongena DH_ECAVI	SMEL_001g135740.1	Receptor-like kinase	MF	GO:0008144	drug binding
S. melongena DH_ECAVI	SMEL_001g139180.1	Ycf2	MF	GO:0008144	drug binding
S. melongena DH_ECAVI	SMEL_001g146420.1	ATP binding _ serine-threonine kinase	MF	GO:0008144	drug binding
S. melongena DH_ECAVI	SMEL_001g146880.1	Ycf2	MF	GO:0008144	drug binding
S. melongena DH_ECAVI	SMEL_001g149970.1	DNA helicase	MF	GO:0008144	drug binding
S. melongena DH_ECAVI	SMEL_001g150540.1	No annotation	MF	GO:0008144	drug binding
S. melongena DH_ECAVI	SMEL_001g150560.1	No annotation	MF	GO:0008144	drug binding
S. melongena DH_ECAVI	SMEL_001g150590.1	No annotation	MF	GO:0008144	drug binding
S. melongena DH_ECAVI	SMEL_001g153160.1	Ycf2	MF	GO:0008144	drug binding
S. melongena DH_ECAVI	SMEL_002g153930.1	Ycf2	MF	GO:0008144	drug binding
S. melongena DH_ECAVI	SMEL_002g155460.1	Kinase family protein	MF	GO:0008144	drug binding
S. melongena DH_ECAVI	SMEL_002g156220.1	Chitin-binding lectin 1	MF	GO:0008144	drug binding
S. melongena DH_ECAVI	SMEL_002g156450.1	Ycf2	MF	GO:0008144	drug binding
S. melongena DH_ECAVI	SMEL_002g156610.1	Ycf2	MF	GO:0008144	drug binding
S. melongena DH_ECAVI	SMEL_002g157030.1	Ycf2	MF	GO:0008144	drug binding
S. melongena DH_ECAVI	SMEL_002g157390.1	ATP synthase subunit alpha, chloroplastic	MF	GO:0008144	drug binding
S. melongena DH_ECAVI	SMEL_002g159210.1	Ycf2	MF	GO:0008144	drug binding
S. melongena DH_ECAVI	SMEL_002g163820.1	DEAD-box ATP-dependent RNA helicase 46	MF	GO:0008144	drug binding
S. melongena DH_ECAVI	SMEL_002g167430.1	ABC transporter B family member 19	MF	GO:0008144	drug binding
S. melongena DH_ECAVI	SMEL_003g169740.1	Receptor like kinase, RLK	MF	GO:0008144	drug binding
S. melongena DH_ECAVI	SMEL_003g170040.1	Receptor like kinase, RLK	MF	GO:0008144	drug binding
S. melongena DH_ECAVI	SMEL_003g170130.1	Receptor like kinase, RLK	MF	GO:0008144	drug binding
S. melongena DH_ECAVI	SMEL_003g170850.1	Ycf2	MF	GO:0008144	drug binding
S. melongena DH_ECAVI	SMEL_003g170910.1	No annotation	MF	GO:0008144	drug binding
S. melongena DH_ECAVI	SMEL_003g175350.1	Ycf2	MF	GO:0008144	drug binding
S. melongena DH_ECAVI	SMEL_003g176760.1	No annotation	MF	GO:0008144	drug binding
S. melongena DH_ECAVI	SMEL_003g177070.1	No annotation	MF	GO:0008144	drug binding
S. melongena DH_ECAVI	SMEL_003g177710.1	Ycf2	MF	GO:0008144	drug binding
S. melongena DH_ECAVI	SMEL_003g177770.1	Ycf2	MF	GO:0008144	drug binding
S. melongena DH_ECAVI	SMEL_003g187100.1	ATP synthase subunit beta chloroplastic	MF	GO:0008144	drug binding
S. melongena DH_ECAVI	SMEL_003g188600.1	Receptor-like kinase	MF	GO:0008144	drug binding
S. melongena DH_ECAVI	SMEL_003g188620.1	Ycf2	MF	GO:0008144	drug binding
S. melongena DH_ECAVI	SMEL_003g198040.1	No annotation	MF	GO:0008144	drug binding
S. melongena DH_ECAVI	SMEL_003g199240.1	Ycf2	MF	GO:0008144	drug binding
S. melongena DH_ECAVI	SMEL_004g203730.1	No annotation	MF	GO:0008144	drug binding
S. melongena DH_ECAVI	SMEL_004g208990.1	ATP synthase subunit alpha, chloroplastic	MF	GO:0008144	drug binding
S. melongena DH_ECAVI	SMEL_004g209790.1	Dephospho-CoA kinase	MF	GO:0008144	drug binding
S. melongena DH_ECAVI	SMEL_004g214390.1	Ycf2	MF	GO:0008144	drug binding
S. melongena DH_ECAVI	SMEL_004g218140.1	Serine_threonine-protein kinase receptor	MF	GO:0008144	drug binding
S. melongena DH_ECAVI	SMEL_004g219300.1	Receptor protein kinase-like	MF	GO:0008144	drug binding
S. melongena DH_ECAVI	SMEL_004g220810.1	No annotation	MF	GO:0008144	drug binding
S. melongena DH_ECAVI	SMEL_004g221660.1	ATP synthase subunit alpha, chloroplastic	MF	GO:0008144	drug binding
S. melongena DH_ECAVI	SMEL_005g224260.1	1-aminocyclopropane-1-carboxylate synthase	MF	GO:0008144	drug binding
S. melongena DH_ECAVI	SMEL_005g229510.1	ABC transporter G family member 1	MF	GO:0008144	drug binding
S. melongena DH_ECAVI	SMEL_005g233380.1	ATP synthase subunit beta chloroplastic	MF	GO:0008144	drug binding
S. melongena DH_ECAVI	SMEL_005g234310.1	No annotation	MF	GO:0008144	drug binding
S. melongena DH_ECAVI	SMEL_005g238820.1	Serine hydroxymethyltransferase	MF	GO:0008144	drug binding
S. melongena DH_ECAVI	SMEL_005g241130.1	No annotation	MF	GO:0008144	drug binding
S. melongena DH_ECAVI	SMEL_005g240330.1	Kinesin like protein	MF	GO:0008144	drug binding
S. melongena DH_ECAVI	SMEL_006g243400.1	Receptor like kinase, RLK	MF	GO:0008144	drug binding
S. melongena DH_ECAVI	SMEL_006g243420.1	Protein kinase-like protein	MF	GO:0008144	drug binding
S. melongena DH_ECAVI	SMEL_006g245800.1	Ycf2	MF	GO:0008144	drug binding
S. melongena DH_ECAVI	SMEL_006g247250.1	Receptor like kinase, RLK	MF	GO:0008144	drug binding
S. melongena DH_ECAVI	SMEL_006g247310.1	Receptor like kinase, RLK	MF	GO:0008144	drug binding
S. melongena DH_ECAVI	SMEL_006g247350.1	Receptor like kinase, RLK	MF	GO:0008144	drug binding
S. melongena DH_ECAVI	SMEL_006g247360.1	Receptor like kinase, RLK	MF	GO:0008144	drug binding
S. melongena DH_ECAVI	SMEL_006g247370.1	Receptor like kinase, RLK	MF	GO:0008144	drug binding
S. melongena DH_ECAVI	SMEL_006g250640.1	Ycf2	MF	GO:0008144	drug binding
S. melongena DH_ECAVI	SMEL_006g251220.1	Multidrug resistance protein ABC transporter family	MF	GO:0008144	drug binding
S. melongena DH_ECAVI	SMEL_006g253610.1	Receptor-like protein kinase	MF	GO:0008144	drug binding
S. melongena DH_ECAVI	SMEL_006g255320.1	ATP synthase subunit alpha, chloroplastic	MF	GO:0008144	drug binding
S. melongena DH_ECAVI	SMEL_006g257430.1	Holliday junction ATP-dependent DNA helicase ruvB	MF	GO:0008144	drug binding
S. melongena DH_ECAVI	SMEL_006g262980.1	ATP-binding cassette (ABC) transporter 17	MF	GO:0008144	drug binding
S. melongena DH_ECAVI	SMEL_006g266510.1	Protein kinase	MF	GO:0008144	drug binding
S. melongena DH_ECAVI	SMEL_007g274410.1	Receptor-like protein kinase	MF	GO:0008144	drug binding
S. melongena DH_ECAVI	SMEL_007g274420.1	Wall-associated receptor kinase-like 9	MF	GO:0008144	drug binding
S. melongena DH_ECAVI	SMEL_007g275800.1	ATP synthase subunit beta chloroplastic	MF	GO:0008144	drug binding
S. melongena DH_ECAVI	SMEL_007g280250.1	Ycf2	MF	GO:0008144	drug binding
S. melongena DH_ECAVI	SMEL_007g280320.1	Receptor protein kinase	MF	GO:0008144	drug binding
S. melongena DH_ECAVI	SMEL_007g281830.1	Gamma aminobutyrate transaminase 1, mitochondrial	MF	GO:0008144	drug binding
S. melongena DH_ECAVI	SMEL_007g282110.1	ATP synthase subunit beta chloroplastic	MF	GO:0008144	drug binding
S. melongena DH_ECAVI	SMEL_007g284020.1	Ycf2	MF	GO:0008144	drug binding
S. melongena DH_ECAVI	SMEL_007g288200.1	No annotation	MF	GO:0008144	drug binding
S. melongena DH_ECAVI	SMEL_007g291650.1	DNA helicase	MF	GO:0008144	drug binding
S. melongena DH_ECAVI	SMEL_007g291720.1	Receptor-like kinase	MF	GO:0008144	drug binding
S. melongena DH_ECAVI	SMEL_007g291760.1	Receptor-like kinase	MF	GO:0008144	drug binding
S. melongena DH_ECAVI	SMEL_007g293310.1	Aluminum resistance protein-like	MF	GO:0008144	drug binding
S. melongena DH_ECAVI	SMEL_007g295460.1	No annotation	MF	GO:0008144	drug binding
S. melongena DH_ECAVI	SMEL_008g307780.1	Kinase family protein	MF	GO:0008144	drug binding
S. melongena DH_ECAVI	SMEL_008g313410.1	Ycf2	MF	GO:0008144	drug binding
S. melongena DH_ECAVI	SMEL_008g315720.1	DNA helicase	MF	GO:0008144	drug binding
S. melongena DH_ECAVI	SMEL_008g317450.1	Receptor like kinase, RLK	MF	GO:0008144	drug binding
S. melongena DH_ECAVI	SMEL_008g319460.1	ATP-dependent DNA helicase	MF	GO:0008144	drug binding
S. melongena DH_ECAVI	SMEL_009g331780.1	Ycf2	MF	GO:0008144	drug binding
S. melongena DH_ECAVI	SMEL_009g333430.1	Myosin XI-F	MF	GO:0008144	drug binding
S. melongena DH_ECAVI	SMEL_009g334450.1	No annotation	MF	GO:0008144	drug binding
S. melongena DH_ECAVI	SMEL_010g337120.1	Receptor-like protein kinase	MF	GO:0008144	drug binding
S. melongena DH_ECAVI	SMEL_010g337950.1	Receptor-like protein kinase	MF	GO:0008144	drug binding
S. melongena DH_ECAVI	SMEL_010g340650.1	No annotation	MF	GO:0008144	drug binding
S. melongena DH_ECAVI	SMEL_010g347190.1	Receptor like kinase, RLK	MF	GO:0008144	drug binding
S. melongena DH_ECAVI	SMEL_010g350300.1	Cystathionine gamma-lyase	MF	GO:0008144	drug binding
S. melongena DH_ECAVI	SMEL_010g352990.1	Kinase family protein	MF	GO:0008144	drug binding
S. melongena DH_ECAVI	SMEL_010g353250.1	Pentatricopeptide repeat-containing protein	MF	GO:0008144	drug binding
S. melongena DH_ECAVI	SMEL_010g358310.1	Calcium dependent protein kinase 2	MF	GO:0008144	drug binding
S. melongena DH_ECAVI	SMEL_011g362340.1	No annotation	MF	GO:0008144	drug binding
S. melongena DH_ECAVI	SMEL_011g373980.1	Receptor-like protein kinase BRI1-like 3	MF	GO:0008144	drug binding
S. melongena DH_ECAVI	SMEL_011g378710.1	Receptor like kinase, RLK	MF	GO:0008144	drug binding
S. melongena DH_ECAVI	SMEL_011g378760.1	Receptor like kinase, RLK	MF	GO:0008144	drug binding
S. melongena DH_ECAVI	SMEL_012g381490.1	Kinase family protein	MF	GO:0008144	drug binding
S. melongena DH_ECAVI	SMEL_012g381720.1	Gamma aminobutyrate transaminase 1, mitochondrial	MF	GO:0008144	drug binding
S. melongena DH_ECAVI	SMEL_012g383210.1	Endochitinase (Chitinase)	MF	GO:0008144	drug binding
S. melongena DH_ECAVI	SMEL_012g385000.1	Receptor like kinase, RLK	MF	GO:0008144	drug binding
S. melongena DH_ECAVI	SMEL_012g386950.1	ATP synthase subunit beta chloroplastic	MF	GO:0008144	drug binding
S. melongena DH_ECAVI	SMEL_012g387420.1	Ycf2	MF	GO:0008144	drug binding
S. melongena DH_ECAVI	SMEL_012g388470.1	Ycf2	MF	GO:0008144	drug binding
S. melongena DH_ECAVI	SMEL_012g389540.1	No annotation	MF	GO:0008144	drug binding
S. melongena DH_ECAVI	SMEL_012g391880.1	Multidrug resistance protein ABC transporter family	MF	GO:0008144	drug binding
S. melongena DH_ECAVI	SMEL_012g398340.1	ATP synthase subunit beta chloroplastic	MF	GO:0008144	drug binding
S. melongena DH_ECAVI	SMEL_002g157390.1	ATP synthase subunit alpha, chloroplastic	MF	GO:0046933	proton-transporting ATP synthase activit...
S. melongena DH_ECAVI	SMEL_004g208990.1	ATP synthase subunit alpha, chloroplastic	MF	GO:0046933	proton-transporting ATP synthase activit...
S. melongena DH_ECAVI	SMEL_004g221660.1	ATP synthase subunit alpha, chloroplastic	MF	GO:0046933	proton-transporting ATP synthase activit...
S. melongena DH_ECAVI	SMEL_005g233380.1	ATP synthase subunit beta chloroplastic	MF	GO:0046933	proton-transporting ATP synthase activit...
S. melongena DH_ECAVI	SMEL_007g282110.1	ATP synthase subunit beta chloroplastic	MF	GO:0046933	proton-transporting ATP synthase activit...
S. melongena DH_ECAVI	SMEL_012g386950.1	ATP synthase subunit beta chloroplastic	MF	GO:0046933	proton-transporting ATP synthase activit...
S. melongena DH_ECAVI	SMEL_001g145450.1	Photosystem II CP43 reaction center protein	MF	GO:0016168	chlorophyll binding
S. melongena DH_ECAVI	SMEL_002g158360.1	Photosystem II D2 protein	MF	GO:0016168	chlorophyll binding
S. melongena DH_ECAVI	SMEL_003g177730.1	Photosystem II CP43 reaction center protein	MF	GO:0016168	chlorophyll binding
S. melongena DH_ECAVI	SMEL_005g233340.1	Photosystem II CP47 reaction center protein	MF	GO:0016168	chlorophyll binding
S. melongena DH_ECAVI	SMEL_005g233410.1	Photosystem II D2 protein	MF	GO:0016168	chlorophyll binding
S. melongena DH_ECAVI	SMEL_009g325570.1	Photosystem II CP43 reaction center protein	MF	GO:0016168	chlorophyll binding
S. melongena DH_ECAVI	SMEL_001g147540.1	Endoribonuclease Dicer homolog 2	MF	GO:0004525	ribonuclease III activity
S. melongena DH_ECAVI	SMEL_005g225600.1	Ribonuclease 3-like protein 3	MF	GO:0004525	ribonuclease III activity
S. melongena DH_ECAVI	SMEL_011g365350.1	Endoribonuclease Dicer homolog 2	MF	GO:0004525	ribonuclease III activity
S. melongena DH_ECAVI	SMEL_011g365390.1	Endoribonuclease Dicer homolog 2	MF	GO:0004525	ribonuclease III activity
S. melongena DH_ECAVI	SMEL_002g162000.1	Ribulose bisphosphate carboxylase large chain	MF	GO:0016984	ribulose-bisphosphate carboxylase activi...
S. melongena DH_ECAVI	SMEL_005g233370.1	Ribulose bisphosphate carboxylase large chain	MF	GO:0016984	ribulose-bisphosphate carboxylase activi...
S. melongena DH_ECAVI	SMEL_012g386960.1	Ribulose bisphosphate carboxylase large chain	MF	GO:0016984	ribulose-bisphosphate carboxylase activi...
S. melongena DH_ECAVI	SMEL_001g116900.1	Phosphoglucomutase	MF	GO:0000287	magnesium ion binding
S. melongena DH_ECAVI	SMEL_002g153620.1	Ribulose bisphosphate carboxylase large chain	MF	GO:0000287	magnesium ion binding
S. melongena DH_ECAVI	SMEL_002g162000.1	Ribulose bisphosphate carboxylase large chain	MF	GO:0000287	magnesium ion binding
S. melongena DH_ECAVI	SMEL_004g205530.1	No annotation	MF	GO:0000287	magnesium ion binding
S. melongena DH_ECAVI	SMEL_005g233370.1	Ribulose bisphosphate carboxylase large chain	MF	GO:0000287	magnesium ion binding
S. melongena DH_ECAVI	SMEL_006g255660.1	Germacrene-D synthase	MF	GO:0000287	magnesium ion binding
S. melongena DH_ECAVI	SMEL_007g285290.1	Alpha-humulene_(-)-(E)-beta-caryophyllene synthase	MF	GO:0000287	magnesium ion binding
S. melongena DH_ECAVI	SMEL_007g289660.1	Ribulose bisphosphate carboxylase large chain	MF	GO:0000287	magnesium ion binding
S. melongena DH_ECAVI	SMEL_010g355110.1	Enolase	MF	GO:0000287	magnesium ion binding
S. melongena DH_ECAVI	SMEL_011g367720.1	Ribulose bisphosphate carboxylase large chain	MF	GO:0000287	magnesium ion binding
S. melongena DH_ECAVI	SMEL_012g386960.1	Ribulose bisphosphate carboxylase large chain	MF	GO:0000287	magnesium ion binding
S. melongena DH_ECAVI	SMEL_006g247180.1	Anthranilate synthase alpha subunit 2, chloroplastic	MF	GO:0016833	oxo-acid-lyase activity
S. melongena DH_ECAVI	SMEL_012g391950.1	Hydroxymethylglutaryl-CoA lyase, mitochondrial	MF	GO:0016833	oxo-acid-lyase activity
S. melongena DH_ECAVI	SMEL_010g360640.1	Adenylosuccinate synthetase, chloroplastic	MF	GO:0004019	adenylosuccinate synthase activity
S. melongena DH_ECAVI	SMEL_001g134630.1	Citrate synthase	MF	GO:0004108	citrate (Si)-synthase activity
S. melongena DH_ECAVI	SMEL_006g257430.1	Holliday junction ATP-dependent DNA helicase ruvB	MF	GO:0009378	four-way junction helicase activity
S. melongena AN-S-26	SMEL_002g157390.1	ATP synthase subunit alpha, chloroplastic	BP	GO:0015991	ATP hydrolysis coupled proton transport
S. melongena AN-S-26	SMEL_002g162010.1	ATP synthase subunit beta chloroplastic	BP	GO:0015991	ATP hydrolysis coupled proton transport
S. melongena AN-S-26	SMEL_003g187100.1	ATP synthase subunit beta chloroplastic	BP	GO:0015991	ATP hydrolysis coupled proton transport
S. melongena AN-S-26	SMEL_004g221660.1	ATP synthase subunit alpha, chloroplastic	BP	GO:0015991	ATP hydrolysis coupled proton transport
S. melongena AN-S-26	SMEL_005g233380.1	ATP synthase subunit beta chloroplastic	BP	GO:0015991	ATP hydrolysis coupled proton transport
S. melongena AN-S-26	SMEL_007g275800.1	ATP synthase subunit beta chloroplastic	BP	GO:0015991	ATP hydrolysis coupled proton transport
S. melongena AN-S-26	SMEL_007g289680.1	ATP synthase subunit beta chloroplastic	BP	GO:0015991	ATP hydrolysis coupled proton transport
S. melongena AN-S-26	SMEL_010g343560.1	Photosystem II CP47 reaction center protein	BP	GO:0015991	ATP hydrolysis coupled proton transport
S. melongena AN-S-26	SMEL_012g386950.1	ATP synthase subunit beta chloroplastic	BP	GO:0015991	ATP hydrolysis coupled proton transport
S. melongena AN-S-26	SMEL_012g387270.1	ATP synthase subunit alpha, mitochondrial	BP	GO:0015991	ATP hydrolysis coupled proton transport
S. melongena AN-S-26	SMEL_001g145450.1	Photosystem II CP43 reaction center protein	BP	GO:0015979	photosynthesis
S. melongena AN-S-26	SMEL_002g155560.1	Cytochrome f	BP	GO:0015979	photosynthesis
S. melongena AN-S-26	SMEL_002g158350.1	Photosystem I P700 chlorophyll a apoprotein A2	BP	GO:0015979	photosynthesis
S. melongena AN-S-26	SMEL_002g158360.1	Photosystem II D2 protein	BP	GO:0015979	photosynthesis
S. melongena AN-S-26	SMEL_002g159210.1	Ycf2	BP	GO:0015979	photosynthesis
S. melongena AN-S-26	SMEL_002g159350.1	Photosystem I P700 chlorophyll a apoprotein A1	BP	GO:0015979	photosynthesis
S. melongena AN-S-26	SMEL_002g162100.1	Oxygen-evolving enhancer protein 1, chloroplastic	BP	GO:0015979	photosynthesis
S. melongena AN-S-26	SMEL_002g162230.1	Photosystem II CP47 reaction center protein	BP	GO:0015979	photosynthesis
S. melongena AN-S-26	SMEL_003g177200.1	Cytochrome b6	BP	GO:0015979	photosynthesis
S. melongena AN-S-26	SMEL_004g204270.1	Photosystem II D2 protein	BP	GO:0015979	photosynthesis
S. melongena AN-S-26	SMEL_004g207140.1	Cytochrome f	BP	GO:0015979	photosynthesis
S. melongena AN-S-26	SMEL_005g233340.1	Photosystem II CP47 reaction center protein	BP	GO:0015979	photosynthesis
S. melongena AN-S-26	SMEL_005g233370.1	Ribulose bisphosphate carboxylase large chain	BP	GO:0015979	photosynthesis
S. melongena AN-S-26	SMEL_005g233400.1	Photosystem I P700 chlorophyll a apoprotein A2	BP	GO:0015979	photosynthesis
S. melongena AN-S-26	SMEL_005g233410.1	Photosystem II D2 protein	BP	GO:0015979	photosynthesis
S. melongena AN-S-26	SMEL_006g253240.1	Photosystem I P700 chlorophyll a apoprotein A2	BP	GO:0015979	photosynthesis
S. melongena AN-S-26	SMEL_006g253990.1	Photosystem I reaction center subunit II, chloroplastic	BP	GO:0015979	photosynthesis
S. melongena AN-S-26	SMEL_007g283120.1	Photosystem II D2 protein	BP	GO:0015979	photosynthesis
S. melongena AN-S-26	SMEL_007g289740.1	Photosystem I P700 chlorophyll a apoprotein A1	BP	GO:0015979	photosynthesis
S. melongena AN-S-26	SMEL_008g308570.1	Photosystem Q(B) protein	BP	GO:0015979	photosynthesis
S. melongena AN-S-26	SMEL_009g325570.1	Photosystem II CP43 reaction center protein	BP	GO:0015979	photosynthesis
S. melongena AN-S-26	SMEL_009g326170.1	Photosystem I P700 chlorophyll a apoprotein A1	BP	GO:0015979	photosynthesis
S. melongena AN-S-26	SMEL_010g343560.1	Photosystem II CP47 reaction center protein	BP	GO:0015979	photosynthesis
S. melongena AN-S-26	SMEL_010g347780.1	Photosystem I P700 chlorophyll a apoprotein	BP	GO:0015979	photosynthesis
S. melongena AN-S-26	SMEL_010g354200.1	Photosystem II CP43 reaction center protein	BP	GO:0015979	photosynthesis
S. melongena AN-S-26	SMEL_011g366140.1	Photosystem II CP47 reaction center protein	BP	GO:0015979	photosynthesis
S. melongena AN-S-26	SMEL_012g383090.1	Photosystem II D2 protein	BP	GO:0015979	photosynthesis
S. melongena AN-S-26	SMEL_012g387760.1	Photosystem Q(B) protein	BP	GO:0015979	photosynthesis
S. melongena AN-S-26	SMEL_012g389630.1	Photosystem I P700 chlorophyll a apoprotein A1	BP	GO:0015979	photosynthesis
S. melongena AN-S-26	SMEL_001g118000.1	Protein kinase	BP	GO:0000184	nuclear-transcribed mRNA catabolic proce...
S. melongena AN-S-26	SMEL_006g266780.1	Protein SMG8	BP	GO:0000184	nuclear-transcribed mRNA catabolic proce...
S. melongena AN-S-26	SMEL_001g115300.1	No annotation	BP	GO:0016070	RNA metabolic process
S. melongena AN-S-26	SMEL_001g118000.1	Protein kinase	BP	GO:0016070	RNA metabolic process
S. melongena AN-S-26	SMEL_001g127300.1	No annotation	BP	GO:0016070	RNA metabolic process
S. melongena AN-S-26	SMEL_001g139890.1	DNA-directed RNA polymerase subunit alpha	BP	GO:0016070	RNA metabolic process
S. melongena AN-S-26	SMEL_001g147540.1	Endoribonuclease Dicer homolog 2	BP	GO:0016070	RNA metabolic process
S. melongena AN-S-26	SMEL_001g149370.1	No annotation	BP	GO:0016070	RNA metabolic process
S. melongena AN-S-26	SMEL_001g150430.1	DNA-directed RNA polymerase subunit beta	BP	GO:0016070	RNA metabolic process
S. melongena AN-S-26	SMEL_001g152330.1	No annotation	BP	GO:0016070	RNA metabolic process
S. melongena AN-S-26	SMEL_002g157430.1	DNA-directed RNA polymerase subunit beta''	BP	GO:0016070	RNA metabolic process
S. melongena AN-S-26	SMEL_002g158370.1	DNA-directed RNA polymerase subunit beta	BP	GO:0016070	RNA metabolic process
S. melongena AN-S-26	SMEL_002g164410.1	Paired amphipathic helix protein SIN3	BP	GO:0016070	RNA metabolic process
S. melongena AN-S-26	SMEL_003g169290.1	No annotation	BP	GO:0016070	RNA metabolic process
S. melongena AN-S-26	SMEL_003g177210.1	DNA-directed RNA polymerase subunit alpha	BP	GO:0016070	RNA metabolic process
S. melongena AN-S-26	SMEL_003g182570.1	Dehydration-responsive element-binding protein 1A	BP	GO:0016070	RNA metabolic process
S. melongena AN-S-26	SMEL_003g184870.1	Transducin beta-like protein 3	BP	GO:0016070	RNA metabolic process
S. melongena AN-S-26	SMEL_003g184910.1	Heat stress transcription factor A3-type, DNA-binding	BP	GO:0016070	RNA metabolic process
S. melongena AN-S-26	SMEL_003g197290.1	AP2-like ethylene-responsive transcription factor	BP	GO:0016070	RNA metabolic process
S. melongena AN-S-26	SMEL_004g208680.1	DNA-directed RNA polymerase subunit alpha	BP	GO:0016070	RNA metabolic process
S. melongena AN-S-26	SMEL_004g211450.1	DNA-directed RNA polymerase subunit beta''	BP	GO:0016070	RNA metabolic process
S. melongena AN-S-26	SMEL_004g212410.1	Lariat debranching enzyme	BP	GO:0016070	RNA metabolic process
S. melongena AN-S-26	SMEL_004g217780.1	BZIP transcription factor	BP	GO:0016070	RNA metabolic process
S. melongena AN-S-26	SMEL_005g225290.1	Ethylene-responsive transcription factor 4	BP	GO:0016070	RNA metabolic process
S. melongena AN-S-26	SMEL_005g225600.1	Ribonuclease 3-like protein 3	BP	GO:0016070	RNA metabolic process
S. melongena AN-S-26	SMEL_005g227520.1	Glucosyltransferase	BP	GO:0016070	RNA metabolic process
S. melongena AN-S-26	SMEL_005g229250.1	unknown protein	BP	GO:0016070	RNA metabolic process
[truncated: 2,108 more rows]
